# Supplementary material for: Probing the ferredoxin:hydrogenase electron transfer complex by infrared difference spectroscopy
Source: Chem Sci. 2025 Apr 30;16(23):10465–75. doi: 10.1039/d5sc00550g (PMC12067460; doi:10.1039/d5sc00550g)
Supplement: SC-016-D5SC00550G-s001 [file SC-016-D5SC00550G-s001.xlsx]

## Sheet: Tabelle1
Fig. 2A			Fig. 2B				Fig. 3A			Fig. 3B					Fig. 4A													Fig. 4B														Fig. 5A				Fig. 5B
nm	CpFd	Y3pCNF-CpFd	E / V vs SHE	CpFd	Y3pCNF-CpFd		cm-1	CpFd	Y3pCNF-CpFd	cm-1	CpFd	cm-1	CpFd:CpI		cm-1	N2	H2	N2	H2	N2	H2	N2	H2	N2	H2	O2	H2	cm-1	N2	H2	N2	H2	N2	H2	N2	H2	N2	H2	O2	H2		cm-1	CpFd:CpI	CpI	CpFd:CpI-O2	cm-1	CpFd:CrHydA1	CrHydA1
700	0.011	0.0089	-0.07364	3.43176	2.60737		999.04	0.25427	0.25311	3998.08961	119	3998.08961	9861		3998.08961	-0.02819	-0.02804	-0.02802	-0.02791	-0.02798	-0.02779	-0.02802	-0.02787	-0.02794	-0.02772	-0.02845	-0.02847	2650.92821	1.5139E-6	1.3946E-6	1.4172E-6	4.705E-7	1.3839E-6	1.0224E-6	8.295E-7	1.472E-6	1.2287E-6	1.5717E-6	7.744E-7	1.4052E-6		2300.87839	-4.7E-5	-1.08E-4	1.34E-4	2230.47598	-3.1E-4	-3.06938E-4
699	0.0111	0.009	-0.07608	3.15752	2.42092		1000	0.24659	0.24755	3997.12529	119	3997.12529	9861		3997.12529	-0.02815	-0.02802	-0.028	-0.02789	-0.02797	-0.02778	-0.028	-0.02784	-0.02792	-0.02771	-0.02845	-0.02846	2649.96388	1.6114E-6	1.2397E-6	1.8368E-6	5.373E-7	8.717E-7	1.0575E-6	5.845E-7	1.5902E-6	1.3207E-6	1.9669E-6	7.443E-7	1.2125E-6		2299.91407	-4.9E-5	-7.7E-5	1.53E-4	2229.51166	-2.86E-4	-3.10201E-4
698	0.0112	0.009	-0.07852	3.01455	2.25579		1000.97	0.23942	0.24243	3996.16096	119	3996.16096	9861		3996.16096	-0.02813	-0.028	-0.02799	-0.02788	-0.02796	-0.02778	-0.02799	-0.02782	-0.02791	-0.02771	-0.02843	-0.02845	2648.99956	1.7883E-6	1.218E-6	2.2441E-6	8.901E-7	4.422E-7	1.178E-6	7.891E-7	1.6422E-6	1.2501E-6	2.0739E-6	9.512E-7	1.1916E-6		2298.94974	-8.2E-5	-5.2E-5	1.8E-4	2228.54734	-2.64E-4	-2.76356E-4
697	0.0113	0.009	-0.08096	2.87409	2.08857		1001.93	0.23283	0.2378	3995.19664	119	3995.19664	9861		3995.19664	-0.02812	-0.02801	-0.028	-0.02789	-0.02795	-0.02778	-0.02799	-0.02781	-0.02791	-0.02771	-0.02842	-0.02845	2648.03523	1.882E-6	1.4404E-6	2.4302E-6	1.4554E-6	1.999E-7	1.5586E-6	1.2641E-6	1.8021E-6	1.0596E-6	2.0398E-6	1.2914E-6	1.1713E-6		2297.98542	-1.05E-4	-5.2E-5	2.13E-4	2227.58302	-2.7E-4	-2.45896E-4
696	0.0114	0.009	-0.0834	2.62368	1.90798		1002.9	0.2268	0.23361	3994.23231	119	3994.23231	9861		3994.23231	-0.02812	-0.02801	-0.02802	-0.02788	-0.02794	-0.02777	-0.02799	-0.0278	-0.02791	-0.02771	-0.02842	-0.02845	2647.07091	1.8789E-6	1.804E-6	2.304E-6	1.9675E-6	3.131E-7	1.9373E-6	1.6685E-6	1.9634E-6	9.759E-7	2.0114E-6	1.6154E-6	1.0605E-6		2297.02109	-1.04E-4	-5.7E-5	2.19E-4	2226.6187	-2.91E-4	-2.46453E-4
695	0.0115	0.009	-0.08584	2.42928	1.92177		1003.86	0.22129	0.22983	3993.26799	119	3993.26799	9861		3993.26799	-0.02812	-0.028	-0.02803	-0.02786	-0.02793	-0.02776	-0.02798	-0.0278	-0.0279	-0.02769	-0.02842	-0.02844	2646.10658	1.8349E-6	2.1904E-6	2.1566E-6	2.1603E-6	8.49E-7	2.0982E-6	1.945E-6	1.8464E-6	1.2924E-6	1.8793E-6	1.9142E-6	1.1064E-6		2296.05677	-1.08E-4	-6.6E-5	1.88E-4	2225.65439	-2.99E-4	-2.513E-4
694	0.0116	0.009	-0.08828	2.34358	1.81141		1004.83	0.21636	0.22654	3992.30366	119	3992.30366	9861		3992.30366	-0.02811	-0.02799	-0.02802	-0.02784	-0.02793	-0.02775	-0.02796	-0.02779	-0.02787	-0.02766	-0.0284	-0.02842	2645.14226	1.5355E-6	2.5346E-6	1.9362E-6	2.1741E-6	1.5569E-6	2.2624E-6	2.0642E-6	1.7021E-6	1.9281E-6	1.6479E-6	2.108E-6	1.3356E-6		2295.09245	-1.18E-4	-7.5E-5	1.53E-4	2224.69007	-2.91E-4	-2.45423E-4
693	0.0117	0.009	-0.09073	2.30345	1.612		1005.79	0.21202	0.22371	3991.33934	119	3991.33934	5039		3991.33934	-0.02808	-0.02797	-0.028	-0.02783	-0.02792	-0.02776	-0.02793	-0.02778	-0.02785	-0.02764	-0.02838	-0.02839	2644.17793	1.0776E-6	2.699E-6	1.5725E-6	2.3505E-6	2.1366E-6	2.4985E-6	1.976E-6	1.8861E-6	2.4279E-6	1.4155E-6	2.1727E-6	1.5758E-6		2294.12812	-1.1E-4	-9E-5	1.33E-4	2223.72575	-2.82E-4	-2.45032E-4
692	0.0117	0.009	-0.09317	2.09108	1.48784		1006.75	0.20818	0.22126	3990.37502	119	3990.37502	-4212		3990.37502	-0.02807	-0.02796	-0.02799	-0.02783	-0.02791	-0.02776	-0.02792	-0.02777	-0.02784	-0.02764	-0.02836	-0.02838	2643.21361	1.0105E-6	2.5223E-6	1.4696E-6	2.6627E-6	2.5141E-6	2.4635E-6	1.8663E-6	2.1123E-6	2.5697E-6	1.218E-6	2.2631E-6	1.9405E-6		2293.1638	-9.3E-5	-1.16E-4	1.36E-4	2222.76143	-2.82E-4	-2.43601E-4
691	0.0118	0.0091	-0.09561	1.96525	1.47195		1007.72	0.20486	0.21922	3989.41069	-2374	3989.41069	-12106		3989.41069	-0.02806	-0.02795	-0.02797	-0.02782	-0.02789	-0.02774	-0.02791	-0.02777	-0.02784	-0.02763	-0.02834	-0.02838	2642.24929	1.5356E-6	2.0941E-6	1.8536E-6	2.7895E-6	2.7432E-6	2.0306E-6	1.9725E-6	2.024E-6	2.5759E-6	1.0776E-6	2.4259E-6	2.4549E-6		2292.19947	-9.7E-5	-1.35E-4	1.49E-4	2221.79711	-2.86E-4	-2.39858E-4
690	0.0119	0.0091	-0.09805	1.8482	1.31435		1008.68	0.20209	0.21762	3988.44637	-4776	3988.44637	-12453		3988.44637	-0.02807	-0.02794	-0.02794	-0.02781	-0.02787	-0.02772	-0.02792	-0.02776	-0.02785	-0.02763	-0.02833	-0.02838	2641.28496	2.2376E-6	1.7002E-6	2.2896E-6	2.603E-6	2.7175E-6	1.5886E-6	2.1693E-6	1.844E-6	2.5515E-6	1.0964E-6	2.4348E-6	2.7631E-6		2291.23515	-1.06E-4	-1.45E-4	1.53E-4	2220.8328	-2.82E-4	-2.51958E-4
689	0.012	0.0091	-0.10049	1.84903	1.21067		1009.65	0.19979	0.21639	3987.48204	-4901	3987.48204	-10352		3987.48204	-0.02807	-0.02793	-0.02793	-0.02781	-0.02786	-0.02771	-0.02794	-0.02776	-0.02785	-0.02763	-0.02833	-0.02839	2640.32064	2.7482E-6	1.3569E-6	2.3227E-6	2.2693E-6	2.3151E-6	1.4475E-6	2.167E-6	1.8116E-6	2.367E-6	1.3149E-6	2.2042E-6	2.6892E-6		2290.27082	-9.3E-5	-1.44E-4	1.61E-4	2219.86848	-2.82E-4	-2.57943E-4
688	0.012	0.0091	-0.10293	1.70313	1.16928		1010.61	0.19791	0.21546	3986.51772	-3203	3986.51772	-10145		3986.51772	-0.02807	-0.02794	-0.02794	-0.02781	-0.02785	-0.02772	-0.02796	-0.02776	-0.02784	-0.02764	-0.02834	-0.02838	2639.35631	3.0944E-6	9.241E-7	2.0049E-6	1.9539E-6	1.8016E-6	1.4683E-6	2.0426E-6	1.7795E-6	2.039E-6	1.5606E-6	2.0375E-6	2.47E-6		2289.3065	-6.8E-5	-1.21E-4	1.72E-4	2218.90416	-2.91E-4	-2.45288E-4
687	0.0121	0.0091	-0.10537	1.5635	1.11828		1011.58	0.19651	0.21486	3985.55339	-384	3985.55339	-7092		3985.55339	-0.02806	-0.02795	-0.02794	-0.02783	-0.02784	-0.02773	-0.02795	-0.02777	-0.02783	-0.02764	-0.02835	-0.02837	2638.39199	3.2107E-6	6.758E-7	1.5537E-6	1.6711E-6	1.5438E-6	1.4676E-6	1.9581E-6	1.6192E-6	1.6334E-6	1.6723E-6	2.0878E-6	2.2585E-6		2288.34217	-5.6E-5	-9.2E-5	1.8E-4	2217.93984	-3E-4	-2.52855E-4
686	0.0122	0.0091	-0.10782	1.46443	1.03384		1012.54	0.19553	0.2146	3984.58907	3278	3984.58907	592		3984.58907	-0.02805	-0.02793	-0.02792	-0.02781	-0.02783	-0.02771	-0.02792	-0.02776	-0.02781	-0.02763	-0.02834	-0.02836	2637.42766	2.8841E-6	1.0106E-6	1.0569E-6	1.4333E-6	1.4379E-6	1.5803E-6	1.7441E-6	1.4611E-6	1.1561E-6	1.7696E-6	2.0578E-6	1.9324E-6		2287.37785	-6.1E-5	-7.8E-5	1.93E-4	2216.97552	-3.15E-4	-2.81036E-4
685	0.0123	0.0091	-0.11026	1.43349	0.9728		1013.51	0.19489	0.21462	3983.62474	7153	3983.62474	9508		3983.62474	-0.02804	-0.02791	-0.02791	-0.02778	-0.02783	-0.02767	-0.02789	-0.02774	-0.02779	-0.02762	-0.02833	-0.02834	2636.46334	2.2816E-6	1.6298E-6	6.853E-7	1.1976E-6	1.2965E-6	1.8377E-6	1.3865E-6	1.3712E-6	7.704E-7	1.974E-6	1.8217E-6	1.406E-6		2286.41352	-7.8E-5	-9.2E-5	1.96E-4	2216.0112	-3.26E-4	-2.74075E-4
684	0.0123	0.0091	-0.1127	1.2462	0.88208		1014.47	0.19462	0.21494	3982.66042	9629	3982.66042	15712		3982.66042	-0.02802	-0.02789	-0.02791	-0.02776	-0.02782	-0.02765	-0.02788	-0.02773	-0.02777	-0.0276	-0.02832	-0.02833	2635.49901	1.6773E-6	2.0264E-6	7.379E-7	9.573E-7	1.3502E-6	1.9621E-6	1.1978E-6	1.2164E-6	7.075E-7	2.1584E-6	1.545E-6	8.792E-7		2285.4492	-8.8E-5	-1.26E-4	1.73E-4	2215.04689	-3.22E-4	-2.37161E-4
683	0.0125	0.0092	-0.11514	1.19311	0.80224		1015.43	0.19474	0.21558	3981.69609	10157	3981.69609	13454		3981.69609	-0.02801	-0.02788	-0.02789	-0.02774	-0.02781	-0.02765	-0.02788	-0.02771	-0.02775	-0.02758	-0.02829	-0.02832	2634.53469	9.286E-7	2.311E-6	1.1205E-6	9.906E-7	1.6777E-6	1.9062E-6	1.2143E-6	1.1462E-6	9.004E-7	2.321E-6	1.1165E-6	5.854E-7		2284.48488	-8.1E-5	-1.44E-4	1.5E-4	2214.08257	-3.2E-4	-2.40639E-4
682	0.0126	0.0092	-0.11758	1.13082	0.76294		1016.4	0.19515	0.21643	3980.73177	10528	3980.73177	2473		3980.73177	-0.028	-0.02787	-0.02787	-0.02773	-0.0278	-0.02764	-0.02788	-0.0277	-0.02774	-0.02757	-0.02827	-0.02832	2633.57036	1.674E-7	2.5438E-6	1.467E-6	1.3602E-6	1.9633E-6	1.8211E-6	1.1996E-6	1.4219E-6	1.1042E-6	2.3427E-6	5.749E-7	5.105E-7		2283.52055	-7E-5	-1.24E-4	1.58E-4	2213.11825	-3.18E-4	-2.85778E-4
681	0.0127	0.0092	-0.12002	1.07313	0.6902		1017.36	0.19585	0.21746	3979.76745	10982	3979.76745	-5825		3979.76745	-0.028	-0.02787	-0.02787	-0.02774	-0.02782	-0.02765	-0.0279	-0.02772	-0.02777	-0.02759	-0.02827	-0.02832	2632.60604	1.262E-7	2.4038E-6	1.7864E-6	1.71E-6	2.1117E-6	1.7034E-6	1.1726E-6	1.8044E-6	1.3858E-6	1.8959E-6	4.835E-7	7.21E-7		2282.55623	-6.4E-5	-9.7E-5	1.71E-4	2212.15393	-3.09E-4	-3.23545E-4
680	0.0128	0.0092	-0.12246	0.97656	0.65007		1018.33	0.19685	0.21872	3978.80312	8981	3978.80312	-5483		3978.80312	-0.028	-0.02789	-0.02788	-0.02775	-0.02782	-0.02767	-0.0279	-0.02774	-0.02779	-0.02759	-0.02829	-0.02832	2631.64172	8.724E-7	1.9668E-6	2.1144E-6	1.8818E-6	2.1869E-6	1.5338E-6	1.2444E-6	1.99E-6	1.7982E-6	1.3155E-6	8.587E-7	1.2314E-6		2281.5919	-7E-5	-8.8E-5	1.61E-4	2211.18961	-3.02E-4	-3.34695E-4
679	0.0129	0.0092	-0.12491	0.84488	0.63		1019.29	0.19812	0.22019	3977.8388	3396	3977.8388	-2335		3977.8388	-0.02798	-0.02789	-0.02787	-0.02773	-0.02781	-0.02767	-0.02789	-0.02773	-0.02778	-0.02757	-0.02829	-0.02831	2630.67739	1.6511E-6	1.6833E-6	2.2204E-6	1.9634E-6	2.122E-6	1.3934E-6	1.3913E-6	2.0909E-6	2.0147E-6	1.2107E-6	1.0707E-6	1.6664E-6		2280.62758	-9.1E-5	-9.1E-5	1.49E-4	2210.22529	-2.99E-4	-3.07722E-4
678	0.0129	0.0093	-0.12735	0.87707	0.53301		1020.26	0.19961	0.22183	3976.87447	-5197	3976.87447	-2340		3976.87447	-0.02798	-0.02788	-0.02786	-0.02772	-0.02779	-0.02765	-0.02787	-0.0277	-0.02775	-0.02755	-0.02828	-0.0283	2629.71307	2.1382E-6	1.5163E-6	2.1096E-6	1.8417E-6	1.9193E-6	1.2221E-6	1.7159E-6	2.1073E-6	1.9709E-6	1.3413E-6	1.0691E-6	1.8154E-6		2279.66325	-1.04E-4	-9.9E-5	1.52E-4	2209.26098	-2.87E-4	-2.68434E-4
677	0.013	0.0093	-0.12979	0.79179	0.57983		1021.22	0.20137	0.22369	3975.91015	-15652	3975.91015	-7237		3975.91015	-0.02798	-0.02785	-0.02785	-0.02771	-0.02779	-0.02763	-0.02786	-0.02768	-0.02774	-0.02754	-0.02826	-0.02829	2628.74874	2.4987E-6	1.1702E-6	2.0782E-6	1.4846E-6	1.6591E-6	9.743E-7	2.2466E-6	1.8198E-6	2.0595E-6	1.2346E-6	1.3302E-6	1.8987E-6		2278.69893	-8.6E-5	-9.8E-5	1.49E-4	2208.29666	-2.78E-4	-2.57405E-4
676	0.0131	0.0093	-0.13223	0.68058	0.4724		1022.18	0.20336	0.22575	3974.94582	-24528	3974.94582	-11996		3974.94582	-0.02797	-0.02783	-0.02783	-0.0277	-0.02778	-0.02761	-0.02785	-0.02768	-0.02773	-0.02752	-0.02825	-0.02827	2627.78442	2.599E-6	8.507E-7	2.0686E-6	1.2459E-6	1.4014E-6	9.135E-7	2.5918E-6	1.3244E-6	2.235E-6	1.0906E-6	1.8606E-6	1.9807E-6		2277.7346	-7.5E-5	-9.2E-5	1.37E-4	2207.33234	-2.8E-4	-2.625E-4
675	0.0132	0.0093	-0.13467	0.65634	0.42307		1023.15	0.20551	0.22793	3973.9815	-27371	3973.9815	-8679		3973.9815	-0.02794	-0.0278	-0.02781	-0.02769	-0.02776	-0.02759	-0.02783	-0.02768	-0.02772	-0.02751	-0.02825	-0.02825	2626.82009	2.2961E-6	8.391E-7	1.806E-6	1.3349E-6	1.2901E-6	1.1834E-6	2.4772E-6	9.008E-7	2.1141E-6	1.157E-6	2.247E-6	1.9676E-6		2276.77028	-8.7E-5	-9.2E-5	1.46E-4	2206.36802	-2.77E-4	-2.72979E-4
674	0.0133	0.0093	-0.13711	0.64756	0.31354		1024.11	0.20782	0.23025	3973.01717	-23306	3973.01717	2284		3973.01717	-0.02794	-0.0278	-0.0278	-0.02769	-0.02776	-0.0276	-0.02783	-0.02768	-0.02771	-0.02751	-0.02825	-0.02825	2625.85577	1.943E-6	9.798E-7	1.493E-6	1.4935E-6	1.3548E-6	1.5976E-6	2.1586E-6	6.851E-7	1.7842E-6	1.2289E-6	2.3398E-6	1.8729E-6		2275.80595	-8.3E-5	-8E-5	1.73E-4	2205.4037	-2.7E-4	-2.82184E-4
673	0.0133	0.0093	-0.13955	0.6091	0.32859		1025.08	0.21034	0.23273	3972.05285	-16031	3972.05285	10634		3972.05285	-0.02795	-0.0278	-0.02781	-0.02769	-0.02776	-0.0276	-0.02783	-0.02768	-0.0277	-0.02751	-0.02825	-0.02825	2624.89144	1.6772E-6	1.1712E-6	1.4306E-6	1.5738E-6	1.4025E-6	2.0147E-6	1.8842E-6	7.639E-7	1.4531E-6	1.2607E-6	2.2707E-6	1.637E-6		2274.84163	-6.9E-5	-5.7E-5	1.77E-4	2204.43938	-2.77E-4	-2.62527E-4
672	0.0134	0.0094	-0.142	0.50291	0.25459		1026.04	0.21304	0.23534	3971.08852	-9647	3971.08852	8037		3971.08852	-0.02795	-0.0278	-0.02781	-0.02769	-0.02776	-0.02761	-0.02783	-0.02768	-0.0277	-0.0275	-0.02825	-0.02825	2623.92712	1.1462E-6	1.5659E-6	1.4706E-6	1.765E-6	1.3212E-6	2.3437E-6	1.5294E-6	1.1516E-6	1.0942E-6	1.5367E-6	2.019E-6	1.2844E-6		2273.87731	-8.6E-5	-4.7E-5	1.57E-4	2203.47507	-2.93E-4	-2.30455E-4
671	0.0135	0.0093	-0.14444	0.42557	0.27257		1027.01	0.21592	0.23807	3970.1242	-6134	3970.1242	862		3970.1242	-0.02793	-0.0278	-0.0278	-0.02769	-0.02776	-0.02761	-0.02782	-0.02767	-0.02771	-0.0275	-0.02824	-0.02825	2622.96279	5.499E-7	2.0306E-6	1.4503E-6	2.0433E-6	1.2341E-6	2.4215E-6	1.0212E-6	1.6942E-6	8.89E-7	2.0213E-6	1.6122E-6	1.1086E-6		2272.91298	-1.12E-4	-4.9E-5	1.35E-4	2202.51075	-3.03E-4	-2.3755E-4
670	0.0135	0.0093	-0.14688	0.4168	0.19439		1027.97	0.21903	0.24094	3969.15988	-5862	3969.15988	1715		3969.15988	-0.0279	-0.0278	-0.0278	-0.0277	-0.02775	-0.02761	-0.02782	-0.02767	-0.02772	-0.0275	-0.02823	-0.02826	2621.99847	6.289E-7	2.1903E-6	1.4449E-6	2.1191E-6	1.3095E-6	2.2237E-6	5.755E-7	2.1343E-6	1.0948E-6	2.2025E-6	1.4122E-6	1.2989E-6		2271.94866	-1.09E-4	-4.6E-5	1.17E-4	2201.54643	-3.09E-4	-2.90035E-4
669	0.0135	0.0094	-0.14932	0.35952	0.16053		1028.93	0.22234	0.24394	3968.19555	-6283	3968.19555	8666		3968.19555	-0.02788	-0.0278	-0.0278	-0.02771	-0.02774	-0.02761	-0.02781	-0.02767	-0.02771	-0.0275	-0.02822	-0.02826	2621.03414	1.277E-6	2.097E-6	1.398E-6	1.9662E-6	1.4405E-6	1.9554E-6	4.218E-7	2.3701E-6	1.4768E-6	2.0211E-6	1.4666E-6	1.6695E-6		2270.98433	-9.9E-5	-3.6E-5	1.07E-4	2200.58211	-3.13E-4	-3.40037E-4
668	0.0136	0.0094	-0.15176	0.30392	0.16095		1029.9	0.22581	0.24698	3967.23123	-4069	3967.23123	8930		3967.23123	-0.02789	-0.0278	-0.02781	-0.02771	-0.02774	-0.0276	-0.0278	-0.02767	-0.02771	-0.02749	-0.02823	-0.02826	2620.06982	1.6285E-6	2.1222E-6	1.2432E-6	1.8106E-6	1.3713E-6	1.7334E-6	5.98E-7	2.5348E-6	1.5536E-6	2.1092E-6	1.3569E-6	1.8986E-6		2270.02001	-9.9E-5	-3.2E-5	1.04E-4	2199.61779	-3.1E-4	-3.55771E-4
667	0.0136	0.0095	-0.1542	0.23871	0.10828		1030.86	0.22945	0.2501	3966.2669	-165	3966.2669	791		3966.2669	-0.02792	-0.02781	-0.02781	-0.0277	-0.02775	-0.0276	-0.0278	-0.02766	-0.02771	-0.02748	-0.02823	-0.02826	2619.1055	1.5837E-6	2.303E-6	1.3177E-6	1.7099E-6	1.2302E-6	1.4979E-6	1.1225E-6	2.6099E-6	1.3801E-6	2.5551E-6	1.1857E-6	1.9436E-6		2269.05568	-8.8E-5	-3.6E-5	1E-4	2198.65348	-2.99E-4	-3.56667E-4
666	0.0136	0.0095	-0.15664	0.22073	-0.01547		1031.83	0.23324	0.25326	3965.30258	2302	3965.30258	-7654		3965.30258	-0.02793	-0.02779	-0.0278	-0.02768	-0.02773	-0.02758	-0.02779	-0.02763	-0.02769	-0.02745	-0.02822	-0.02824	2618.14117	1.719E-6	2.3103E-6	1.7909E-6	1.5551E-6	1.3225E-6	1.2602E-6	1.9581E-6	2.3859E-6	1.4969E-6	2.6835E-6	1.4497E-6	1.968E-6		2268.09136	-7.7E-5	-4.8E-5	1.06E-4	2197.68916	-2.94E-4	-3.49926E-4
665	0.0136	0.0095	-0.15909	0.16011	0.04348		1032.79	0.23713	0.25642	3964.33825	2793	3964.33825	-13066		3964.33825	-0.0279	-0.02777	-0.02778	-0.02766	-0.02771	-0.02756	-0.02777	-0.02761	-0.02767	-0.02745	-0.02821	-0.02823	2617.17685	2.0708E-6	2.0156E-6	2.2022E-6	1.4213E-6	1.5144E-6	1.1865E-6	2.6774E-6	1.9433E-6	2.031E-6	2.255E-6	1.996E-6	1.9647E-6		2267.12703	-8.1E-5	-6.4E-5	1.27E-4	2196.72484	-3.03E-4	-3.23957E-4
664	0.0137	0.0095	-0.16153	0.16137	0		1033.76	0.24116	0.25958	3963.37393	1896	3963.37393	-17155		3963.37393	-0.02787	-0.02775	-0.02776	-0.02764	-0.02769	-0.02753	-0.02776	-0.0276	-0.02766	-0.02745	-0.02819	-0.02821	2616.21252	2.2751E-6	1.6459E-6	2.1956E-6	1.5219E-6	1.5771E-6	1.4105E-6	2.901E-6	1.5815E-6	2.463E-6	1.6676E-6	2.2655E-6	1.8032E-6		2266.16271	-9.3E-5	-6.4E-5	1.42E-4	2195.76052	-3.12E-4	-3.05749E-4
663	0.0137	0.0095	-0.16397	0.18143	-0.07818		1034.72	0.24537	0.26283	3962.4096	-909	3962.4096	-19359		3962.4096	-0.02785	-0.02774	-0.02775	-0.02763	-0.02768	-0.02752	-0.02776	-0.0276	-0.02766	-0.02744	-0.02818	-0.02819	2615.2482	2.2748E-6	1.4094E-6	1.9627E-6	1.8445E-6	1.6871E-6	1.8008E-6	2.8089E-6	1.3746E-6	2.4671E-6	1.127E-6	2.1425E-6	1.5175E-6		2265.19838	-1.01E-4	-3.9E-5	1.35E-4	2194.7962	-3.08E-4	-3.21024E-4
662	0.0137	0.0095	-0.16641	0.07232	-0.01923		1035.68	0.24977	0.26619	3961.44528	-5020	3961.44528	-17212		3961.44528	-0.02784	-0.02775	-0.02775	-0.02761	-0.02768	-0.02753	-0.02776	-0.02759	-0.02766	-0.02744	-0.02817	-0.02818	2614.28387	2.1814E-6	1.3775E-6	1.8048E-6	2.1372E-6	1.9708E-6	2.128E-6	2.5834E-6	1.3241E-6	2.2317E-6	6.792E-7	1.9073E-6	1.241E-6		2264.23406	-9.3E-5	-2.9E-5	1.2E-4	2193.83188	-2.94E-4	-3.48349E-4
661	0.0138	0.0095	-0.16885	0.01003	-0.17809		1036.65	0.25436	0.26965	3960.48095	-6447	3960.48095	-12254		3960.48095	-0.02785	-0.02776	-0.02776	-0.02761	-0.02769	-0.02754	-0.02777	-0.02759	-0.02767	-0.02746	-0.02818	-0.02819	2613.31955	2.0364E-6	1.6011E-6	1.7927E-6	2.3099E-6	2.1692E-6	2.3276E-6	2.1184E-6	1.456E-6	1.9687E-6	6.689E-7	1.7061E-6	1.0801E-6		2263.26973	-7.4E-5	-6.5E-5	1.13E-4	2192.86757	-2.81E-4	-3.50162E-4
660	0.0139	0.0095	-0.17129	-0.09197	-0.0857		1037.61	0.25921	0.27331	3959.51663	-1803	3959.51663	-7006		3959.51663	-0.02785	-0.02775	-0.02775	-0.02762	-0.02769	-0.02754	-0.02777	-0.02759	-0.02767	-0.02748	-0.02819	-0.0282	2612.35522	2.0095E-6	1.9314E-6	1.8496E-6	2.3743E-6	2.1665E-6	2.3623E-6	1.5528E-6	1.6074E-6	1.8312E-6	1.1842E-6	1.5547E-6	1.227E-6		2262.30541	-5.7E-5	-1.15E-4	1.13E-4	2191.90325	-2.76E-4	-3.27435E-4
659	0.014	0.0095	-0.17373	-0.08236	-0.12876		1038.58	0.26434	0.27716	3958.55231	6367	3958.55231	449		3958.55231	-0.02785	-0.02774	-0.02775	-0.02762	-0.02769	-0.02753	-0.02776	-0.02759	-0.02766	-0.02748	-0.02819	-0.02819	2611.3909	2.2845E-6	2.057E-6	1.9134E-6	2.2014E-6	2.2504E-6	2.1326E-6	1.3174E-6	1.6035E-6	1.968E-6	1.747E-6	1.5619E-6	1.7412E-6		2261.34109	-5.4E-5	-1.25E-4	1.23E-4	2190.93893	-2.74E-4	-3.21151E-4
658	0.014	0.0095	-0.17618	-0.08277	-0.25919		1039.54	0.26967	0.28114	3957.58798	12186	3957.58798	9697		3957.58798	-0.02787	-0.02775	-0.02775	-0.02764	-0.02769	-0.02752	-0.02777	-0.02759	-0.02765	-0.02746	-0.02819	-0.02818	2610.42657	2.6467E-6	2.1002E-6	1.9472E-6	1.8967E-6	2.549E-6	1.818E-6	1.5198E-6	1.5597E-6	2.1661E-6	2.1259E-6	1.6801E-6	2.2685E-6		2260.37676	-7.6E-5	-9E-5	1.34E-4	2189.97461	-2.75E-4	-3.42253E-4
657	0.0141	0.0096	-0.17862	-0.12374	-0.21195		1040.51	0.27523	0.28523	3956.62366	12626	3956.62366	15063		3956.62366	-0.02788	-0.02776	-0.02775	-0.02764	-0.02768	-0.02752	-0.02777	-0.02758	-0.02764	-0.02745	-0.02818	-0.02819	2609.46225	2.6357E-6	2.4511E-6	1.9236E-6	1.8041E-6	2.7327E-6	1.843E-6	1.7961E-6	1.7519E-6	2.01E-6	2.6161E-6	1.7308E-6	2.3899E-6		2259.41244	-9.4E-5	-6.9E-5	1.23E-4	2189.01029	-2.93E-4	-3.62793E-4
656	0.0141	0.0096	-0.18106	-0.13336	-0.26713		1041.47	0.28104	0.28947	3955.65933	8942	3955.65933	14696		3955.65933	-0.02786	-0.02776	-0.02774	-0.02762	-0.02768	-0.02752	-0.02776	-0.02757	-0.02763	-0.02743	-0.02816	-0.02818	2608.49793	2.2037E-6	2.9639E-6	1.9722E-6	1.9825E-6	2.5904E-6	2.213E-6	1.9183E-6	2.172E-6	1.6187E-6	3.2909E-6	1.8528E-6	2.1903E-6		2258.44811	-8.4E-5	-9.7E-5	9.7E-5	2188.04597	-3.09E-4	-3.47433E-4
655	0.0142	0.0096	-0.1835	-0.18018	-0.34573		1042.43	0.28706	0.29381	3954.69501	4288	3954.69501	11152		3954.69501	-0.02785	-0.02774	-0.02773	-0.02761	-0.02767	-0.02752	-0.02774	-0.02757	-0.02763	-0.02742	-0.02815	-0.02817	2607.5336	1.8626E-6	3.1893E-6	2.281E-6	2.2015E-6	2.4323E-6	2.5514E-6	2.1023E-6	2.5614E-6	1.4989E-6	3.689E-6	2.3262E-6	2.1465E-6		2257.48379	-8E-5	-1.47E-4	9.3E-5	2187.08166	-3.01E-4	-2.96954E-4
654	0.0143	0.0097	-0.18594	-0.20025	-0.3428		1043.4	0.29324	0.29818	3953.73068	1134	3953.73068	5249		3953.73068	-0.02785	-0.02774	-0.02772	-0.02761	-0.02767	-0.02751	-0.02774	-0.02758	-0.02764	-0.02743	-0.02815	-0.02817	2606.56928	1.9579E-6	3.0918E-6	2.6932E-6	2.4195E-6	2.5153E-6	2.7943E-6	2.4241E-6	2.9387E-6	1.7776E-6	3.5103E-6	2.9236E-6	2.4292E-6		2256.51946	-8.8E-5	-1.75E-4	1.19E-4	2186.11734	-2.8E-4	-2.64376E-4
653	0.0143	0.0097	-0.18838	-0.26672	-0.30518		1044.36	0.29962	0.30261	3952.76636	-550	3952.76636	-2301		3952.76636	-0.02786	-0.02774	-0.02771	-0.0276	-0.02768	-0.02751	-0.02773	-0.02759	-0.02765	-0.02743	-0.02816	-0.02818	2605.60495	2.1974E-6	3.0371E-6	2.9047E-6	2.8381E-6	2.6144E-6	3.1366E-6	2.5475E-6	3.4342E-6	2.2009E-6	3.0587E-6	3.0701E-6	2.7368E-6		2255.55514	-8.4E-5	-1.52E-4	1.43E-4	2185.15302	-2.67E-4	-2.74629E-4
652	0.0144	0.0097	-0.19082	-0.2872	-0.39756		1045.33	0.3062	0.30708	3951.80203	-2118	3951.80203	-10874		3951.80203	-0.02785	-0.02774	-0.02771	-0.02758	-0.02768	-0.02751	-0.02772	-0.02759	-0.02764	-0.02742	-0.02816	-0.02817	2604.64063	2.34E-6	3.218E-6	2.9627E-6	3.3521E-6	2.6579E-6	3.526E-6	2.4522E-6	3.8116E-6	2.5683E-6	2.7787E-6	2.7746E-6	2.8999E-6		2254.59081	-8.3E-5	-1.01E-4	1.4E-4	2184.1887	-2.64E-4	-3.01761E-4
651	0.0144	0.0097	-0.19327	-0.31897	-0.32942		1046.29	0.31294	0.31156	3950.83771	-3254	3950.83771	-18261		3950.83771	-0.02783	-0.02773	-0.02772	-0.02758	-0.02766	-0.0275	-0.02771	-0.02758	-0.02763	-0.02741	-0.02814	-0.02816	2603.6763	2.6294E-6	3.502E-6	3.0531E-6	3.6939E-6	2.9372E-6	3.7876E-6	2.5426E-6	3.9008E-6	2.9061E-6	2.8099E-6	2.6E-6	3.0025E-6		2253.62649	-1E-4	-7.2E-5	1.33E-4	2183.22438	-2.62E-4	-3.22161E-4
650	0.0144	0.0097	-0.19571	-0.30768	-0.39506		1047.26	0.31984	0.31609	3949.87338	-3103	3949.87338	-18629		3949.87338	-0.02784	-0.02772	-0.02773	-0.02758	-0.02765	-0.0275	-0.02771	-0.02758	-0.02762	-0.02742	-0.02814	-0.02815	2602.71198	3.1575E-6	3.7772E-6	3.1881E-6	3.9059E-6	3.4264E-6	3.9253E-6	2.8737E-6	3.981E-6	3.3233E-6	3.05E-6	2.7277E-6	3.0609E-6		2252.66216	-1.21E-4	-8.3E-5	1.57E-4	2182.26006	-2.61E-4	-3.45972E-4
649	0.0145	0.0097	-0.19815	-0.35283	-0.44271		1048.22	0.32692	0.32073	3948.90906	-1364	3948.90906	-9994		3948.90906	-0.02784	-0.02771	-0.02773	-0.02759	-0.02765	-0.0275	-0.02772	-0.02758	-0.02762	-0.02742	-0.02814	-0.02816	2601.74765	3.7436E-6	4.0537E-6	3.362E-6	4.0764E-6	3.7803E-6	4.0005E-6	3.1836E-6	4.172E-6	3.7997E-6	3.3815E-6	2.942E-6	3.18E-6		2251.69784	-1.36E-4	-1.18E-4	1.78E-4	2181.29575	-2.76E-4	-3.74593E-4
648	0.0146	0.0098	-0.20059	-0.43017	-0.47532		1049.19	0.33415	0.32548	3947.94474	1696	3947.94473	1567		3947.94474	-0.02783	-0.02771	-0.02772	-0.0276	-0.02766	-0.02751	-0.02772	-0.02758	-0.02762	-0.02743	-0.02815	-0.02816	2600.78333	4.2442E-6	4.2871E-6	3.5867E-6	4.1196E-6	3.8859E-6	4.0033E-6	3.4199E-6	4.2681E-6	4.1874E-6	3.743E-6	3.2449E-6	3.4668E-6		2250.73352	-1.32E-4	-1.48E-4	1.64E-4	2180.33143	-2.91E-4	-3.64775E-4
647	0.0146	0.0098	-0.20303	-0.4423	-0.53719		1050.15	0.34152	0.33034	3946.98041	4233	3946.98041	9120		3946.98041	-0.02783	-0.02772	-0.02772	-0.0276	-0.02766	-0.02751	-0.02772	-0.02758	-0.02763	-0.02742	-0.02815	-0.02816	2599.819	4.4506E-6	4.3594E-6	3.8047E-6	4.0958E-6	3.8645E-6	3.9514E-6	3.6873E-6	4.2632E-6	4.3391E-6	4.1498E-6	3.7147E-6	3.7085E-6		2249.76919	-1.23E-4	-1.64E-4	1.43E-4	2179.36711	-2.91E-4	-3.17562E-4
646	0.0146	0.0098	-0.20547	-0.47281	-0.54723		1051.11	0.34902	0.33532	3946.01609	4998	3946.01609	12599		3946.01609	-0.02784	-0.02771	-0.02772	-0.02759	-0.02765	-0.0275	-0.02772	-0.02756	-0.02762	-0.02742	-0.02816	-0.02816	2598.85468	4.4115E-6	4.2615E-6	4.0165E-6	4.2284E-6	3.7631E-6	3.9868E-6	4.039E-6	4.2312E-6	4.2401E-6	4.5148E-6	4.1681E-6	3.7581E-6		2248.80487	-1.24E-4	-1.61E-4	1.27E-4	2178.40279	-2.91E-4	-2.82816E-4
645	0.0147	0.0099	-0.20791	-0.47658	-0.54514		1052.08	0.35663	0.3404	3945.05176	3770	3945.05176	15111		3945.05176	-0.02784	-0.0277	-0.02771	-0.02759	-0.02765	-0.02748	-0.02772	-0.02756	-0.02762	-0.02741	-0.02816	-0.02816	2597.89036	4.5234E-6	4.112E-6	4.2889E-6	4.4688E-6	3.6201E-6	4.1632E-6	4.4862E-6	4.1383E-6	4.1052E-6	4.6164E-6	4.5414E-6	3.7877E-6		2247.84054	-1.14E-4	-1.34E-4	1.09E-4	2177.43847	-2.97E-4	-2.7553E-4
644	0.0147	0.0099	-0.21035	-0.5443	-0.54179		1053.04	0.36427	0.34556	3944.08744	215	3944.08744	14267		3944.08744	-0.02782	-0.0277	-0.02771	-0.02758	-0.02765	-0.02747	-0.02772	-0.02756	-0.02761	-0.02742	-0.02816	-0.02815	2596.92603	4.7696E-6	3.9981E-6	4.569E-6	4.5681E-6	3.5709E-6	4.3004E-6	4.9321E-6	4.0363E-6	4.0841E-6	4.5088E-6	4.892E-6	3.9699E-6		2246.87622	-9.7E-5	-1.13E-4	9.2E-5	2176.47415	-2.98E-4	-2.87727E-4
643	0.0148	0.01	-0.2128	-0.54346	-0.61202		1054.01	0.37197	0.35083	3943.12311	-4459	3943.12311	5508		3943.12311	-0.02781	-0.0277	-0.0277	-0.02757	-0.02763	-0.02746	-0.02772	-0.02755	-0.02759	-0.02741	-0.02814	-0.02814	2595.96171	4.812E-6	4.0419E-6	4.7417E-6	4.5357E-6	3.6797E-6	4.3317E-6	5.2049E-6	3.9803E-6	4.0256E-6	4.4676E-6	4.988E-6	4.3433E-6		2245.91189	-9.6E-5	-1.04E-4	8.3E-5	2175.50984	-2.94E-4	-3.23281E-4
642	0.0148	0.01	-0.21524	-0.56562	-0.67724		1054.97	0.37973	0.35619	3942.15879	-8884	3942.15879	-8291		3942.15879	-0.02781	-0.0277	-0.0277	-0.02758	-0.02762	-0.02747	-0.02772	-0.02756	-0.02759	-0.02741	-0.02813	-0.02814	2594.99738	4.6684E-6	4.3207E-6	4.8172E-6	4.5239E-6	3.903E-6	4.3466E-6	5.2155E-6	3.9257E-6	3.9486E-6	4.4743E-6	4.6553E-6	4.802E-6		2244.94757	-1.04E-4	-7.1E-5	9.1E-5	2174.54552	-2.96E-4	-3.69533E-4
641	0.0149	0.01	-0.21768	-0.61537	-0.64965		1055.94	0.38746	0.36154	3941.19446	-11541	3941.19446	-18591		3941.19446	-0.02782	-0.02771	-0.02772	-0.0276	-0.02763	-0.02749	-0.02773	-0.02757	-0.02762	-0.02741	-0.02813	-0.02815	2594.03306	4.5609E-6	4.6634E-6	4.8055E-6	4.4905E-6	4.2225E-6	4.3053E-6	5.0132E-6	3.8371E-6	4.0938E-6	4.3365E-6	4.2076E-6	5.1186E-6		2243.98324	-1.01E-4	-2.7E-5	1.08E-4	2173.5812	-2.99E-4	-3.79155E-4
640	0.0149	0.01	-0.22012	-0.63334	-0.67557		1056.9	0.39513	0.36693	3940.23014	-11195	3940.23014	-20994		3940.23014	-0.02783	-0.02772	-0.02773	-0.0276	-0.02764	-0.0275	-0.02772	-0.02757	-0.02764	-0.02742	-0.02813	-0.02815	2593.06873	4.5793E-6	4.8578E-6	4.5703E-6	4.3744E-6	4.545E-6	4.1961E-6	4.805E-6	3.7905E-6	4.348E-6	4.0854E-6	4.0278E-6	5.1057E-6		2243.01892	-9.8E-5	-1.8E-5	1.1E-4	2172.61688	-3E-4	-3.4909E-4
639	0.015	0.0101	-0.22256	-0.62289	-0.73911		1057.86	0.40278	0.3724	3939.26581	-10655	3939.26581	-15953		3939.26581	-0.02783	-0.02772	-0.02774	-0.02759	-0.02764	-0.02751	-0.02771	-0.02757	-0.02763	-0.02742	-0.02813	-0.02815	2592.10441	4.5882E-6	4.9065E-6	4.1699E-6	4.3181E-6	4.6733E-6	4.1721E-6	4.7035E-6	3.9813E-6	4.4568E-6	3.8327E-6	4.0439E-6	4.6533E-6		2242.05459	-1.13E-4	-4.2E-5	9.7E-5	2171.65256	-3.05E-4	-3.33845E-4
638	0.015	0.0101	-0.225	-0.6509	-0.7876		1058.83	0.41026	0.37785	3938.30149	-12170	3938.30149	-5693		3938.30149	-0.02784	-0.02772	-0.02774	-0.02759	-0.02765	-0.02751	-0.02771	-0.02757	-0.02762	-0.0274	-0.02812	-0.02817	2591.14008	4.3633E-6	4.8606E-6	3.9192E-6	4.3927E-6	4.6425E-6	4.3002E-6	4.491E-6	4.4541E-6	4.3868E-6	3.6427E-6	3.9924E-6	3.8937E-6		2241.09027	-1.42E-4	-7.6E-5	9.6E-5	2170.68825	-3.14E-4	-3.38449E-4
637	0.015	0.0101	-0.22744	-0.77297	-0.8616		1059.79	0.41747	0.38322	3937.33717	-13100	3937.33716	5768		3937.33717	-0.02783	-0.02771	-0.02772	-0.02759	-0.02765	-0.0275	-0.0277	-0.02756	-0.02761	-0.02739	-0.02812	-0.02817	2590.17576	4.0274E-6	4.637E-6	3.9033E-6	4.4192E-6	4.6103E-6	4.4603E-6	4.0503E-6	4.8804E-6	4.1668E-6	3.6134E-6	3.8359E-6	3.2448E-6		2240.12595	-1.66E-4	-1.12E-4	1.25E-4	2169.72393	-3.18E-4	-3.3975E-4
636	0.0151	0.0102	-0.22989	-0.72322	-0.81185		1060.76	0.4245	0.38855	3936.37284	-10219	3936.37284	13940		3936.37284	-0.02782	-0.02771	-0.0277	-0.02759	-0.02765	-0.02749	-0.02769	-0.02757	-0.0276	-0.02739	-0.02813	-0.02816	2589.21143	3.9277E-6	4.1802E-6	3.9985E-6	4.2768E-6	4.4728E-6	4.5058E-6	3.6454E-6	4.9545E-6	3.9235E-6	3.7379E-6	3.717E-6	2.9796E-6		2239.16162	-1.62E-4	-1.4E-4	1.52E-4	2168.75961	-3.1E-4	-3.48714E-4
635	0.0151	0.0102	-0.23233	-0.71779	-0.83359		1061.72	0.43133	0.39385	3935.40852	-3055	3935.40852	16726		3935.40852	-0.02781	-0.0277	-0.0277	-0.0276	-0.02764	-0.02749	-0.02769	-0.02757	-0.02759	-0.02741	-0.02814	-0.02815	2588.24711	4.0699E-6	3.6088E-6	4.1072E-6	4.091E-6	4.1729E-6	4.3232E-6	3.5229E-6	4.7054E-6	3.8549E-6	3.8873E-6	3.758E-6	3.0721E-6		2238.1973	-1.2E-4	-1.57E-4	1.55E-4	2167.79529	-2.94E-4	-3.60585E-4
634	0.0151	0.0102	-0.23477	-0.77883	-0.931		1062.69	0.43776	0.39895	3934.44419	5717	3934.44419	13338		3934.44419	-0.02779	-0.0277	-0.0277	-0.02758	-0.02764	-0.02749	-0.02767	-0.02756	-0.02758	-0.02741	-0.02812	-0.02812	2587.28279	4.2415E-6	3.129E-6	4.1386E-6	3.8726E-6	3.9221E-6	3.8778E-6	3.672E-6	4.2398E-6	4.0441E-6	3.8646E-6	3.8808E-6	3.4438E-6		2237.23297	-5.8E-5	-1.75E-4	1.39E-4	2166.83097	-2.84E-4	-3.52799E-4
633	0.0152	0.0103	-0.23721	-0.85366	-0.92681		1063.65	0.44374	0.40383	3933.47987	12114	3933.47987	2953		3933.47987	-0.02777	-0.02768	-0.02769	-0.02755	-0.02763	-0.02747	-0.02766	-0.02754	-0.02757	-0.02738	-0.02809	-0.02811	2586.31846	4.2974E-6	2.9229E-6	4.0571E-6	3.4735E-6	3.8813E-6	3.3221E-6	3.8505E-6	3.6517E-6	4.2891E-6	3.5897E-6	3.9211E-6	3.9326E-6		2236.26865	-1.8E-5	-1.75E-4	1.22E-4	2165.86665	-2.83E-4	-3.39171E-4
632	0.0152	0.0103	-0.23965	-0.86285	-0.89212		1064.61	0.44938	0.40854	3932.51554	14156	3932.51554	-8560		3932.51554	-0.02777	-0.02767	-0.02767	-0.02753	-0.02762	-0.02746	-0.02765	-0.02752	-0.02758	-0.02736	-0.02807	-0.02811	2585.35414	4.0912E-6	3.0014E-6	3.8208E-6	3.0271E-6	3.8836E-6	2.9054E-6	3.7011E-6	3.034E-6	4.1992E-6	3.278E-6	3.7525E-6	4.1818E-6		2235.30432	-3.1E-5	-1.4E-4	1.14E-4	2164.90234	-2.85E-4	-3.41125E-4
631	0.0152	0.0103	-0.24209	-0.92263	-1.01126		1065.58	0.45456	0.41295	3931.55122	11839	3931.55122	-12979		3931.55122	-0.02777	-0.02767	-0.02766	-0.02753	-0.02761	-0.02746	-0.02765	-0.02752	-0.02759	-0.02736	-0.02808	-0.02811	2584.38981	3.656E-6	3.1748E-6	3.4603E-6	2.7039E-6	3.6237E-6	2.6732E-6	3.2316E-6	2.4148E-6	3.7965E-6	3.0678E-6	3.3117E-6	3.964E-6		2234.34	-7.5E-5	-9.9E-5	1.09E-4	2163.93802	-2.83E-4	-3.54408E-4
630	0.0153	0.0103	-0.24453	-0.97782	-0.98032		1066.54	0.45915	0.41698	3930.58689	5535	3930.58689	-11203		3930.58689	-0.02778	-0.02769	-0.02766	-0.02755	-0.02761	-0.02747	-0.02767	-0.02753	-0.0276	-0.02737	-0.02809	-0.02812	2583.42549	3.2847E-6	3.2988E-6	3.1639E-6	2.4711E-6	3.2014E-6	2.5065E-6	2.7949E-6	1.9469E-6	3.4875E-6	2.8392E-6	2.7851E-6	3.4375E-6		2233.37567	-1.03E-4	-9E-5	1.02E-4	2162.9737	-2.78E-4	-3.7908E-4
629	0.0153	0.0104	-0.24698	-0.931	-1.10281		1067.51	0.4632	0.42067	3929.62257	-1764	3929.62257	-7705		3929.62257	-0.02779	-0.0277	-0.02768	-0.02757	-0.02762	-0.02749	-0.02769	-0.02755	-0.02761	-0.02739	-0.02811	-0.02813	2582.46116	3.1154E-6	3.3952E-6	2.9243E-6	2.4004E-6	2.9603E-6	2.4491E-6	2.5295E-6	1.8494E-6	3.2536E-6	2.5724E-6	2.4537E-6	2.8658E-6		2232.41135	-1.03E-4	-1.04E-4	9.5E-5	2162.00938	-2.68E-4	-4.01623E-4
628	0.0153	0.0104	-0.24942	-0.97322	-1.17681		1068.47	0.4667	0.42402	3928.65824	-4325	3928.65824	-3347		3928.65824	-0.0278	-0.02771	-0.02771	-0.02758	-0.02763	-0.0275	-0.0277	-0.02755	-0.02762	-0.02741	-0.02812	-0.02815	2581.49684	3.0169E-6	3.4409E-6	2.6289E-6	2.534E-6	2.9553E-6	2.6123E-6	2.4184E-6	2.0838E-6	2.8564E-6	2.411E-6	2.3849E-6	2.4018E-6		2231.44702	-9.2E-5	-8.9E-5	7.7E-5	2161.04506	-2.6E-4	-3.93831E-4
627	0.0154	0.0105	-0.25186	-0.92556	-1.17263		1069.44	0.46949	0.4269	3927.69392	-1350	3927.69392	2806		3927.69392	-0.0278	-0.02772	-0.02772	-0.02758	-0.02763	-0.02749	-0.02769	-0.02755	-0.02762	-0.02742	-0.02812	-0.02816	2580.53251	2.851E-6	3.3565E-6	2.4749E-6	2.7133E-6	3.1009E-6	2.9214E-6	2.4443E-6	2.4435E-6	2.4716E-6	2.4421E-6	2.4427E-6	2.1222E-6		2230.4827	-1.01E-4	-6.7E-5	6.1E-5	2160.08074	-2.57E-4	-3.76721E-4
626	0.0154	0.0105	-0.2543	-0.99203	-1.15841		1070.4	0.47165	0.42931	3926.7296	1419	3926.72959	8671		3926.7296	-0.0278	-0.02771	-0.0277	-0.02757	-0.02763	-0.02748	-0.02768	-0.02755	-0.02761	-0.02741	-0.02811	-0.02815	2579.56819	2.6677E-6	3.2009E-6	2.6118E-6	2.8929E-6	3.3318E-6	3.2554E-6	2.55E-6	2.8153E-6	2.2732E-6	2.7023E-6	2.4913E-6	2.1141E-6		2229.51838	-1.31E-4	-9E-5	8.4E-5	2159.11643	-2.53E-4	-3.75918E-4
625	0.0154	0.0105	-0.25674	-1.13333	-1.17723		1071.36	0.47326	0.43128	3925.76527	1336	3925.76527	9517		3925.76527	-0.0278	-0.0277	-0.02769	-0.02758	-0.02763	-0.02747	-0.02769	-0.02754	-0.02759	-0.0274	-0.02809	-0.02813	2578.60386	2.716E-6	3.0907E-6	2.8826E-6	3.1558E-6	3.4639E-6	3.5894E-6	2.7693E-6	3.1701E-6	2.1867E-6	3.1525E-6	2.5618E-6	2.449E-6		2228.55405	-1.41E-4	-1.21E-4	1.29E-4	2158.15211	-2.53E-4	-3.68789E-4
624	0.0154	0.0106	-0.25918	-1.16552	-1.26669		1072.33	0.47418	0.43273	3924.80095	-385	3924.80095	3843		3924.80095	-0.0278	-0.0277	-0.02769	-0.02757	-0.02762	-0.02747	-0.0277	-0.02753	-0.02759	-0.0274	-0.02809	-0.02812	2577.63954	3.0221E-6	3.0025E-6	3.2109E-6	3.408E-6	3.3501E-6	3.7892E-6	3.0545E-6	3.4305E-6	2.2568E-6	3.5598E-6	2.7787E-6	3.0345E-6		2227.58973	-1.24E-4	-1.13E-4	1.55E-4	2157.18779	-2.6E-4	-3.57727E-4
623	0.0154	0.0106	-0.26162	-1.12497	-1.2855		1073.29	0.47434	0.43363	3923.83662	-3551	3923.83662	-5913		3923.83662	-0.02779	-0.0277	-0.02768	-0.02757	-0.02762	-0.02748	-0.02769	-0.02753	-0.02759	-0.02741	-0.02809	-0.02812	2576.67522	3.202E-6	2.7959E-6	3.5127E-6	3.4141E-6	3.1315E-6	3.5065E-6	3.2687E-6	3.4798E-6	2.5996E-6	3.642E-6	3.1305E-6	3.6247E-6		2226.6254	-1.11E-4	-8.6E-5	1.56E-4	2156.22347	-2.73E-4	-3.62567E-4
622	0.0154	0.0107	-0.26407	-1.11661	-1.42262		1074.26	0.47397	0.4341	3922.8723	-6220	3922.8723	-16806		3922.8723	-0.02779	-0.02769	-0.02766	-0.02757	-0.02761	-0.02749	-0.02769	-0.02754	-0.02758	-0.02742	-0.02809	-0.02813	2575.71089	3.0716E-6	2.4988E-6	3.5686E-6	3.1092E-6	2.967E-6	2.7018E-6	3.4005E-6	3.2981E-6	3.0823E-6	3.2636E-6	3.4028E-6	3.9619E-6		2225.66108	-1.1E-4	-7.4E-5	1.42E-4	2155.25915	-2.85E-4	-3.67164E-4
621	0.0155	0.0107	-0.26651	-1.1396	-1.42806		1075.22	0.47311	0.4341	3921.90797	-6053	3921.90797	-21848		3921.90797	-0.0278	-0.02769	-0.02767	-0.02757	-0.02761	-0.0275	-0.02768	-0.02755	-0.02757	-0.02741	-0.0281	-0.02813	2574.74657	2.8436E-6	2.3393E-6	3.3137E-6	2.746E-6	2.6776E-6	1.9507E-6	3.3448E-6	2.9472E-6	3.2451E-6	2.5613E-6	3.3869E-6	3.775E-6		2224.69675	-1.1E-4	-9.1E-5	1.28E-4	2154.29483	-2.94E-4	-3.67079E-4
620	0.0155	0.0108	-0.26895	-1.1651	-1.55472		1076.19	0.4716	0.4335	3920.94365	-3604	3920.94365	-12967		3920.94365	-0.02782	-0.02768	-0.02768	-0.02756	-0.02761	-0.0275	-0.02768	-0.02755	-0.02757	-0.02739	-0.0281	-0.02813	2573.78224	2.6724E-6	2.3611E-6	2.8437E-6	2.5837E-6	2.1441E-6	1.7187E-6	2.9973E-6	2.506E-6	2.8871E-6	1.9413E-6	3.0384E-6	2.9157E-6		2223.73243	-1.09E-4	-1.26E-4	1.21E-4	2153.33052	-2.91E-4	-3.81208E-4
619	0.0155	0.0108	-0.27139	-1.24119	-1.58524		1077.15	0.46949	0.43239	3919.97932	-553	3919.97932	1859		3919.97932	-0.02782	-0.02768	-0.02769	-0.02756	-0.02762	-0.02749	-0.02768	-0.02755	-0.02758	-0.02738	-0.02811	-0.02813	2572.81792	2.5834E-6	2.3782E-6	2.4023E-6	2.4786E-6	1.7526E-6	1.7769E-6	2.6377E-6	2.0545E-6	2.4389E-6	1.6017E-6	2.4723E-6	1.795E-6		2222.7681	-1E-4	-1.39E-4	1.14E-4	2152.3662	-2.81E-4	-3.98622E-4
618	0.0155	0.0108	-0.27383	-1.23952	-1.6191		1078.11	0.46695	0.43088	3919.015	1330	3919.015	8965		3919.015	-0.02781	-0.02768	-0.0277	-0.02757	-0.02763	-0.02749	-0.02768	-0.02755	-0.0276	-0.02738	-0.02811	-0.02814	2571.85359	2.5672E-6	2.3112E-6	2.2091E-6	2.2293E-6	1.8768E-6	1.8075E-6	2.5501E-6	1.6857E-6	2.2074E-6	1.3738E-6	1.994E-6	1.122E-6		2221.80378	-9E-5	-9.8E-5	1.11E-4	2151.40188	-2.82E-4	-3.90282E-4
617	0.0156	0.0108	-0.27627	-1.35908	-1.67805		1079.08	0.46389	0.42894	3918.05067	1361	3918.05067	8325		3918.05067	-0.02781	-0.02768	-0.0277	-0.02755	-0.02762	-0.02748	-0.02768	-0.02754	-0.02759	-0.02738	-0.0281	-0.02813	2570.88927	2.4898E-6	2.134E-6	2.0701E-6	1.8365E-6	2.2081E-6	1.7502E-6	2.5372E-6	1.3951E-6	1.9778E-6	1.1389E-6	1.8643E-6	1.0626E-6		2220.83945	-1.04E-4	-3.6E-5	1.12E-4	2150.43756	-2.88E-4	-3.66253E-4
616	0.0156	0.0109	-0.27871	-1.36827	-1.69644		1080.04	0.46032	0.42657	3917.08635	369	3917.08635	4550		3917.08635	-0.0278	-0.02767	-0.02769	-0.02754	-0.02762	-0.02747	-0.02769	-0.02754	-0.02759	-0.02738	-0.02808	-0.02813	2569.92494	2.3E-6	1.7286E-6	1.7943E-6	1.2753E-6	2.261E-6	1.476E-6	2.3174E-6	1.053E-6	1.7071E-6	8.951E-7	2.0265E-6	1.3439E-6		2219.87513	-1.42E-4	-1.3E-5	1.1E-4	2149.47324	-2.9E-4	-3.52052E-4
615	0.0156	0.011	-0.28116	-1.44185	-1.78298		1081.01	0.45645	0.4239	3916.12203	-684	3916.12202	939		3916.12203	-0.02781	-0.02767	-0.0277	-0.02755	-0.02765	-0.02747	-0.02771	-0.02754	-0.02761	-0.0274	-0.02809	-0.02814	2568.96062	1.9925E-6	1.2525E-6	1.5237E-6	7.319E-7	1.9489E-6	1.0923E-6	1.8757E-6	7.432E-7	1.5637E-6	7.195E-7	2.0885E-6	1.6384E-6		2218.91081	-1.56E-4	-3.6E-5	1.04E-4	2148.50893	-2.9E-4	-3.44397E-4
614	0.0157	0.011	-0.2836	-1.42429	-1.9502		1081.97	0.45225	0.42089	3915.1577	-729	3915.1577	-1906		3915.1577	-0.02782	-0.02769	-0.02772	-0.02758	-0.02767	-0.02747	-0.02773	-0.02755	-0.02763	-0.02742	-0.02812	-0.02815	2567.99629	1.4475E-6	1.036E-6	1.3155E-6	5.48E-7	1.3656E-6	9.728E-7	1.2436E-6	7.214E-7	1.3881E-6	8.052E-7	1.7391E-6	1.6276E-6		2217.94648	-1.25E-4	-4.9E-5	9.6E-5	2147.54461	-2.94E-4	-3.37241E-4
613	0.0157	0.011	-0.28604	-1.40799	-2.00329		1082.94	0.44764	0.41748	3914.19338	1131	3914.19338	-5945		3914.19338	-0.02781	-0.02769	-0.02773	-0.02759	-0.02767	-0.02747	-0.02772	-0.02755	-0.02763	-0.02742	-0.02812	-0.02815	2567.03197	8.666E-7	9.675E-7	1.1962E-6	5.966E-7	8.08E-7	1.0606E-6	5.322E-7	8.828E-7	1.0826E-6	1.092E-6	1.169E-6	1.3732E-6		2216.98216	-9.2E-5	-2.8E-5	9.2E-5	2146.58029	-3.04E-4	-3.39675E-4
612	0.0157	0.0111	-0.28848	-1.53884	-2.09025		1083.9	0.44275	0.41385	3913.22905	2953	3913.22905	-8311		3913.22905	-0.0278	-0.02768	-0.02771	-0.02759	-0.02765	-0.02748	-0.02769	-0.02755	-0.02761	-0.02742	-0.02811	-0.02815	2566.06765	6.201E-7	7.035E-7	1.2834E-6	4.439E-7	6.306E-7	9.472E-7	2.55E-8	8.671E-7	1.0022E-6	1.1761E-6	6.756E-7	1.1921E-6		2216.01783	-8.8E-5	-2.7E-5	1E-4	2145.61597	-3.08E-4	-3.65343E-4
611	0.0158	0.0111	-0.29092	-1.6028	-2.21315		1084.87	0.43765	0.41005	3912.26473	1418	3912.26473	-4480		3912.26473	-0.02779	-0.02768	-0.02768	-0.02758	-0.02763	-0.02749	-0.02768	-0.02754	-0.0276	-0.02742	-0.0281	-0.02814	2565.10332	6.177E-7	3.1E-7	1.4042E-6	1.117E-7	7.631E-7	5.616E-7	-9.62E-8	6.645E-7	1.2927E-6	9.416E-7	2.989E-7	1.0096E-6		2215.05351	-9.8E-5	-6.2E-5	1.15E-4	2144.65165	-2.97E-4	-4.09801E-4
610	0.0158	0.0111	-0.29336	-1.64711	-2.26666		1085.83	0.43223	0.40599	3911.3004	-1819	3911.3004	3797		3911.3004	-0.02779	-0.02768	-0.02767	-0.02757	-0.02761	-0.02749	-0.02768	-0.02753	-0.0276	-0.02741	-0.0281	-0.02814	2564.139	6.431E-7	1.145E-7	1.3047E-6	-1.28E-8	8.799E-7	1.948E-7	2.54E-8	4.905E-7	1.4836E-6	6.558E-7	5.41E-8	5.878E-7		2214.08918	-1.15E-4	-9E-5	1.21E-4	2143.68733	-2.85E-4	-4.31228E-4
609	0.0158	0.0111	-0.2958	-1.70898	-2.36156		1086.79	0.42653	0.40169	3910.33608	-1844	3910.33608	10527		3910.33608	-0.02779	-0.02769	-0.02767	-0.02755	-0.0276	-0.02749	-0.02768	-0.02753	-0.02761	-0.02741	-0.0281	-0.02813	2563.17467	6.993E-7	1.8E-7	1.104E-6	2.719E-7	8.649E-7	1.264E-7	2.254E-7	4.662E-7	1.1678E-6	5.087E-7	-4.16E-8	8.32E-8		2213.12486	-1.4E-4	-1.03E-4	1.13E-4	2142.72302	-2.83E-4	-4.05363E-4
608	0.0159	0.0112	-0.29825	-1.73992	-2.48196		1087.76	0.42068	0.39732	3909.37175	542	3909.37175	12416		3909.37175	-0.02779	-0.02769	-0.02769	-0.02756	-0.02761	-0.0275	-0.02769	-0.02754	-0.02762	-0.02741	-0.02811	-0.02814	2562.21035	7.593E-7	2.486E-7	9.428E-7	7.573E-7	8.716E-7	3.506E-7	5.445E-7	6.058E-7	4.91E-7	4.619E-7	-8.84E-8	-2.493E-7		2212.16053	-1.47E-4	-1.24E-4	1.12E-4	2141.7587	-2.87E-4	-3.76012E-4
607	0.0159	0.0112	-0.30069	-1.74661	-2.61322		1088.72	0.41466	0.39284	3908.40743	870	3908.40743	11390		3908.40743	-0.02781	-0.02769	-0.0277	-0.02757	-0.02763	-0.02749	-0.02771	-0.02756	-0.02762	-0.02741	-0.02811	-0.02814	2561.24602	8.533E-7	2.377E-7	7.901E-7	1.0581E-6	1.0133E-6	6.213E-7	9.445E-7	7.688E-7	-1.48E-7	3.949E-7	-5.6E-8	-2.868E-7		2211.19621	-1.23E-4	-1.36E-4	1.29E-4	2140.79438	-2.9E-4	-3.82189E-4
606	0.0159	0.0112	-0.30313	-1.80305	-2.70352		1089.69	0.40844	0.38819	3907.4431	-76	3907.4431	8719		3907.4431	-0.02782	-0.02769	-0.02769	-0.02756	-0.02764	-0.02748	-0.02771	-0.02756	-0.02761	-0.02741	-0.02811	-0.02812	2560.2817	9.451E-7	2.606E-7	5.913E-7	9.925E-7	1.0009E-6	7.201E-7	1.1699E-6	7.877E-7	-5.498E-7	2.221E-7	1.706E-7	-6.42E-8		2210.23188	-9.5E-5	-1.19E-4	1.36E-4	2139.83006	-2.9E-4	-4.05382E-4
605	0.016	0.0113	-0.30557	-1.95271	-2.90084		1090.65	0.40211	0.38347	3906.47878	1869	3906.47878	2078		3906.47878	-0.02781	-0.02767	-0.02767	-0.02753	-0.02763	-0.02747	-0.0277	-0.02754	-0.02759	-0.0274	-0.0281	-0.02811	2559.31737	8.821E-7	2.46E-7	2.802E-7	6.012E-7	5.945E-7	5.221E-7	1.0798E-6	5.896E-7	-7.403E-7	-5.08E-8	4.884E-7	2.543E-7		2209.26756	-7.9E-5	-9.2E-5	1.2E-4	2138.86574	-2.88E-4	-4.2135E-4
604	0.016	0.0114	-0.30801	-1.92261	-2.93178		1091.62	0.39562	0.37868	3905.51445	6266	3905.51445	-6569		3905.51445	-0.02781	-0.02767	-0.02766	-0.02753	-0.02761	-0.02748	-0.0277	-0.02752	-0.02758	-0.02739	-0.02809	-0.0281	2558.35305	6.368E-7	5.15E-8	-1.243E-7	2.7E-8	5.19E-8	4.13E-8	6.819E-7	1.169E-7	-7.377E-7	-3.776E-7	6.625E-7	5.2E-7		2208.30324	-7.2E-5	-7E-5	1.02E-4	2137.90142	-2.93E-4	-4.33963E-4
603	0.016	0.0114	-0.31045	-2.02545	-3.13871		1092.58	0.38888	0.37374	3904.55013	8489	3904.55013	-12044		3904.55013	-0.0278	-0.02769	-0.02768	-0.02753	-0.0276	-0.02747	-0.0277	-0.02752	-0.02757	-0.02737	-0.02809	-0.02809	2557.38872	1.298E-7	-2.57E-7	-5.41E-7	-4.436E-7	-3.636E-7	-4.642E-7	4.52E-8	-5.236E-7	-5.794E-7	-6.725E-7	5.584E-7	5.305E-7		2207.33891	-6.8E-5	-5.9E-5	9.5E-5	2136.93711	-2.98E-4	-4.57364E-4
602	0.0161	0.0115	-0.31289	-2.07561	-3.26538		1093.54	0.38202	0.36869	3903.58581	7387	3903.58581	-14665		3903.58581	-0.0278	-0.0277	-0.02769	-0.02755	-0.0276	-0.02746	-0.02769	-0.02752	-0.02757	-0.02736	-0.02809	-0.0281	2556.4244	-6.144E-7	-5.24E-7	-8.806E-7	-6.687E-7	-6.567E-7	-7.875E-7	-5.895E-7	-1.0456E-6	-4.023E-7	-8.488E-7	2.442E-7	2.333E-7		2206.37459	-6.7E-5	-6.1E-5	9.4E-5	2135.97279	-2.95E-4	-4.91485E-4
601	0.0161	0.0115	-0.31534	-2.17762	-3.28921		1094.51	0.37512	0.36361	3902.62148	5654	3902.62148	-14094		3902.62148	-0.02779	-0.02769	-0.02768	-0.02755	-0.0276	-0.02746	-0.02767	-0.02751	-0.02757	-0.02735	-0.02808	-0.0281	2555.46008	-1.1507E-6	-7.002E-7	-9.705E-7	-8.589E-7	-8.196E-7	-9.398E-7	-9.358E-7	-1.3066E-6	-2.334E-7	-9.608E-7	-9.72E-8	-7.8E-8		2205.41026	-7.3E-5	-6.3E-5	1.06E-4	2135.00847	-2.88E-4	-5.05715E-4
600	0.0161	0.0115	-0.31778	-2.23238	-3.51537		1095.47	0.36808	0.35842	3901.65716	3364	3901.65716	-8656		3901.65716	-0.02777	-0.02766	-0.02766	-0.02753	-0.02759	-0.02746	-0.02765	-0.02749	-0.02755	-0.02735	-0.02806	-0.02809	2554.49575	-1.1655E-6	-8.448E-7	-7.832E-7	-1.1529E-6	-8.014E-7	-1.0273E-6	-9.338E-7	-1.4318E-6	3.77E-8	-1.0759E-6	-3.964E-7	-2.366E-7		2204.44594	-8.3E-5	-5.9E-5	1.27E-4	2134.04415	-2.86E-4	-4.79093E-4
599	0.0161	0.0115	-0.32022	-2.2721	-3.5785		1096.44	0.36089	0.35308	3900.69283	68	3900.69283	-2367		3900.69283	-0.02775	-0.02764	-0.02764	-0.02751	-0.02758	-0.02745	-0.02764	-0.02749	-0.02754	-0.02735	-0.02805	-0.02808	2553.53143	-9.005E-7	-9.898E-7	-5.461E-7	-1.3749E-6	-6.491E-7	-1.1457E-6	-7.437E-7	-1.5782E-6	3.513E-7	-1.1274E-6	-6.155E-7	-4.095E-7		2203.48161	-9.1E-5	-6.5E-5	1.37E-4	2133.07983	-2.93E-4	-4.28751E-4
598	0.0162	0.0111	-0.32266	-2.39668	-3.76704		1097.4	0.35366	0.34772	3899.72851	-1973	3899.72851	811		3899.72851	-0.02776	-0.02763	-0.02765	-0.02751	-0.02758	-0.02744	-0.02764	-0.0275	-0.02756	-0.02735	-0.02806	-0.02808	2552.5671	-7.134E-7	-1.0721E-6	-4.704E-7	-1.3565E-6	-5.449E-7	-1.2381E-6	-5.809E-7	-1.6327E-6	3.632E-7	-1.0515E-6	-7.225E-7	-7.193E-7		2202.51729	-9.5E-5	-9.3E-5	1.37E-4	2132.11551	-2.96E-4	-3.90339E-4
597	0.0167	0.0114	-0.3251	-2.50453	-4.00742		1098.37	0.34642	0.34236	3898.76418	-2406	3898.76418	3185		3898.76418	-0.02777	-0.02764	-0.02766	-0.02753	-0.02759	-0.02745	-0.02765	-0.02752	-0.02757	-0.02737	-0.02808	-0.0281	2551.60278	-7.318E-7	-1.0595E-6	-6.104E-7	-1.0787E-6	-6.524E-7	-1.1729E-6	-5.67E-7	-1.3317E-6	-1.432E-7	-8.303E-7	-8.917E-7	-1.1606E-6		2201.55296	-9E-5	-1.34E-4	1.38E-4	2131.1512	-2.84E-4	-3.97758E-4
596	0.0168	0.0115	-0.32754	-2.54341	-4.13994		1099.33	0.33908	0.33694	3897.79986	-2281	3897.79986	8412		3897.79986	-0.02778	-0.02765	-0.02768	-0.02756	-0.02761	-0.02747	-0.02767	-0.02753	-0.02758	-0.02739	-0.02809	-0.02812	2550.63845	-8.657E-7	-1.0171E-6	-8.536E-7	-7.223E-7	-8.86E-7	-9.776E-7	-6.915E-7	-8.465E-7	-9.02E-7	-5.902E-7	-1.2035E-6	-1.6578E-6		2200.58864	-8.9E-5	-1.59E-4	1.36E-4	2130.18688	-2.71E-4	-4.46256E-4
595	0.017	0.0118	-0.32998	-2.62995	-4.26326		1100.29	0.33174	0.33149	3896.83553	34	3896.83553	14268		3896.83553	-0.02779	-0.02767	-0.0277	-0.02758	-0.02764	-0.02748	-0.0277	-0.02754	-0.02759	-0.0274	-0.02811	-0.02813	2549.67413	-9.177E-7	-9.075E-7	-1.0071E-6	-4.372E-7	-1.0263E-6	-7.442E-7	-8.684E-7	-5.456E-7	-1.4065E-6	-4.393E-7	-1.4036E-6	-1.9134E-6		2199.62431	-1.03E-4	-1.49E-4	1.25E-4	2129.22256	-2.79E-4	-4.78744E-4
594	0.0169	0.0119	-0.33243	-2.8026	-4.47605		1101.26	0.32445	0.32607	3895.87121	4646	3895.87121	16401		3895.87121	-0.0278	-0.02768	-0.02771	-0.02758	-0.02764	-0.02749	-0.02771	-0.02755	-0.0276	-0.02741	-0.02813	-0.02814	2548.7098	-9.145E-7	-7.29E-7	-1.0535E-6	-1.731E-7	-1.0709E-6	-5.343E-7	-9.987E-7	-4.116E-7	-1.4848E-6	-3.313E-7	-1.454E-6	-1.7576E-6		2198.65999	-1.14E-4	-1.3E-4	1.13E-4	2128.25824	-2.93E-4	-4.53554E-4
593	0.0156	0.0109	-0.33487	-2.90293	-4.59018		1102.22	0.31712	0.32062	3894.90688	7974	3894.90688	16279		3894.90688	-0.02779	-0.02767	-0.02769	-0.02755	-0.02762	-0.02748	-0.0277	-0.02754	-0.0276	-0.0274	-0.02812	-0.02813	2547.74548	-9.249E-7	-6.556E-7	-1.0457E-6	-1.7E-9	-1.0531E-6	-3.945E-7	-9.969E-7	-3.749E-7	-1.3672E-6	-2.966E-7	-1.4697E-6	-1.3264E-6		2197.69567	-1.18E-4	-1.24E-4	1.16E-4	2127.29392	-2.92E-4	-4.13791E-4
592	0.0166	0.0109	-0.33731	-3.00828	-4.71894		1103.19	0.30982	0.31516	3893.94256	8269	3893.94256	14917		3893.94256	-0.02776	-0.02766	-0.02767	-0.02753	-0.0276	-0.02746	-0.02769	-0.02753	-0.02759	-0.02738	-0.0281	-0.02812	2546.78115	-8.63E-7	-7.731E-7	-9.627E-7	-7.6E-8	-8.982E-7	-3.84E-7	-9.478E-7	-5.181E-7	-1.2168E-6	-4.271E-7	-1.2859E-6	-8.38E-7		2196.73134	-1.29E-4	-1.12E-4	1.37E-4	2126.3296	-2.91E-4	-4.23906E-4
591	0.0168	0.0114	-0.33975	-3.13328	-4.91166		1104.15	0.30262	0.30975	3892.97824	8233	3892.97824	10470		3892.97824	-0.02775	-0.02766	-0.02766	-0.02752	-0.0276	-0.02744	-0.02768	-0.02751	-0.02759	-0.02738	-0.02809	-0.02811	2545.81683	-7.867E-7	-8.989E-7	-8.648E-7	-2.449E-7	-7.105E-7	-4.976E-7	-9.55E-7	-6.862E-7	-1.0081E-6	-6.056E-7	-9.156E-7	-4.875E-7		2195.76702	-1.29E-4	-9.3E-5	1.38E-4	2125.36529	-3.05E-4	-4.58771E-4
590	0.0168	0.0117	-0.34219	-3.26413	-5.03456		1105.12	0.29548	0.30435	3892.01391	10232	3892.01391	5194		3892.01391	-0.02774	-0.02764	-0.02764	-0.02752	-0.0276	-0.02742	-0.02767	-0.0275	-0.02759	-0.02738	-0.02807	-0.02809	2544.8525	-8.001E-7	-7.329E-7	-8.368E-7	-3.186E-7	-7.046E-7	-5.202E-7	-9.073E-7	-5.834E-7	-8.09E-7	-5.968E-7	-7.084E-7	-2.38E-7		2194.80269	-1.05E-4	-7.9E-5	9.9E-5	2124.40097	-3.23E-4	-4.52714E-4
589	0.0164	0.0117	-0.34463	-3.3816	-5.30713		1106.08	0.28838	0.29895	3891.04959	12135	3891.04959	2516		3891.04959	-0.02774	-0.02763	-0.02762	-0.02752	-0.0276	-0.02742	-0.02767	-0.0275	-0.02758	-0.02738	-0.02805	-0.02808	2543.88818	-7.315E-7	-2.901E-7	-7.723E-7	-4.347E-7	-7.652E-7	-3.793E-7	-6.983E-7	-3.022E-7	-6.508E-7	-4.604E-7	-7.41E-7	6.58E-8		2193.83837	-9.5E-5	-7.6E-5	6.9E-5	2123.43665	-3.3E-4	-4.26259E-4
588	0.0159	0.0115	-0.34707	-3.52123	-5.40997		1107.04	0.2814	0.29362	3890.08526	10804	3890.08526	1418		3890.08526	-0.02775	-0.02763	-0.02762	-0.02752	-0.0276	-0.02745	-0.02768	-0.02752	-0.02758	-0.02738	-0.02807	-0.02809	2542.92386	-3.371E-7	3.68E-8	-6.078E-7	-7.607E-7	-5.569E-7	-3.686E-7	-3.655E-7	-2.634E-7	-3.86E-7	-4.642E-7	-7.592E-7	3.509E-7		2192.87404	-1.03E-4	-9.6E-5	7.9E-5	2122.47233	-3.14E-4	-4.37187E-4
587	0.0162	0.0116	-0.34952	-3.65082	-5.5404		1108.01	0.27458	0.28833	3889.12094	7200	3889.12094	-64		3889.12094	-0.02776	-0.02764	-0.02764	-0.02753	-0.02759	-0.02747	-0.02767	-0.02753	-0.02757	-0.02737	-0.02809	-0.02811	2541.95953	1.271E-7	1.701E-7	-5.032E-7	-1.1128E-6	-1.872E-7	-4.817E-7	-7.52E-8	-4.412E-7	-8.49E-8	-5.472E-7	-5.909E-7	3.593E-7		2191.90972	-1.02E-4	-1.11E-4	9.3E-5	2121.50801	-2.86E-4	-4.66859E-4
586	0.0165	0.0121	-0.35196	-3.81553	-5.65453		1108.97	0.26784	0.28301	3888.15661	3801	3888.15661	-1316		3888.15661	-0.02776	-0.02764	-0.02764	-0.02752	-0.02758	-0.02746	-0.02765	-0.02751	-0.02756	-0.02736	-0.02808	-0.02811	2540.99521	1.748E-7	3.282E-7	-5.51E-7	-1.1982E-6	-1.448E-7	-4.094E-7	-6.87E-8	-3.898E-7	-9.46E-8	-4.738E-7	-3.707E-7	-6.59E-8		2190.94539	-9.6E-5	-1.09E-4	8.8E-5	2120.5437	-2.76E-4	-4.75709E-4
585	0.0163	0.0122	-0.3544	-3.94011	-5.82969		1109.94	0.26125	0.27777	3887.19229	500	3887.19229	-2062		3887.19229	-0.02774	-0.02762	-0.02761	-0.0275	-0.02756	-0.02742	-0.02762	-0.02747	-0.02754	-0.02733	-0.02803	-0.02806	2540.03088	-2.91E-8	3.697E-7	-5.638E-7	-1.0296E-6	-3.889E-7	-3.111E-7	-2.271E-7	-1.525E-7	-3.837E-7	-3.276E-7	-2.274E-7	-6.201E-7		2189.98107	-8.6E-5	-1.15E-4	6.7E-5	2119.57938	-2.93E-4	-4.77221E-4
584	0.0162	0.0121	-0.35684	-4.11736	-5.92459		1110.9	0.25485	0.27265	3886.22796	-2482	3886.22796	-2870		3886.22796	-0.02771	-0.02758	-0.02758	-0.02746	-0.02753	-0.02738	-0.0276	-0.02743	-0.0275	-0.02729	-0.02798	-0.02801	2539.06656	-3.2E-8	1.382E-7	-3.177E-7	-7.286E-7	-4.02E-7	-4.319E-7	-1.746E-7	-1.455E-7	-5.112E-7	-3.14E-7	4.04E-8	-7.411E-7		2189.01674	-8.6E-5	-1.28E-4	5.2E-5	2118.61506	-3.17E-4	-4.92422E-4
583	0.0164	0.0122	-0.35928	-4.27204	-6.13194		1111.87	0.24858	0.26759	3885.26364	-3010	3885.26364	-2080		3885.26364	-0.0277	-0.02757	-0.02758	-0.02745	-0.02752	-0.02737	-0.0276	-0.02743	-0.0275	-0.02729	-0.02798	-0.028	2538.10223	6.24E-8	-4.99E-8	2.27E-8	-2.242E-7	-2.024E-7	-4.435E-7	5.74E-8	-2.37E-7	-3.894E-7	-3.02E-7	4.239E-7	-4.364E-7		2188.05242	-1.09E-4	-1.28E-4	5.9E-5	2117.65074	-3.31E-4	-5.14172E-4
582	0.0159	0.012	-0.36172	-4.4447	-6.26572		1112.83	0.24246	0.26264	3884.29931	-1830	3884.29931	2146		3884.29931	-0.02771	-0.0276	-0.0276	-0.02746	-0.02755	-0.02739	-0.02761	-0.02746	-0.02752	-0.02731	-0.02801	-0.02804	2537.13791	-6.16E-8	1.7E-8	1.402E-7	3.109E-7	-2.214E-7	-1.414E-7	1.721E-7	-9.38E-8	-2.678E-7	-1.852E-7	5.392E-7	-2.465E-7		2187.08809	-1.25E-4	-1.02E-4	8.1E-5	2116.68642	-3.28E-4	-5.13888E-4
581	0.0159	0.0124	-0.36416	-4.55088	-6.38235		1113.79	0.2366	0.25788	3883.33499	-1955	3883.33499	6299		3883.33499	-0.02772	-0.02762	-0.02763	-0.02747	-0.02757	-0.02741	-0.02762	-0.02748	-0.02753	-0.02733	-0.02804	-0.02806	2536.17358	-2.327E-7	1.453E-7	1.775E-7	5.328E-7	-3.474E-7	1.717E-7	1.628E-7	1.457E-7	-8.41E-8	-1.599E-7	4.502E-7	-2.446E-7		2186.12377	-1.33E-4	-7.8E-5	1.02E-4	2115.7221	-3.16E-4	-4.84119E-4
580	0.0162	0.0125	-0.3666	-4.74945	-6.5015		1114.76	0.23099	0.2533	3882.37067	-2750	3882.37067	4825		3882.37067	-0.02772	-0.02761	-0.02762	-0.02746	-0.02756	-0.0274	-0.0276	-0.02747	-0.02752	-0.02731	-0.02803	-0.02804	2535.20926	-2.036E-7	1.448E-7	2.71E-7	5.312E-7	-2.954E-7	2.949E-7	8.49E-8	2.532E-7	2.805E-7	-2.366E-7	4.196E-7	-1.721E-7		2185.15945	-1.35E-4	-8.9E-5	1.13E-4	2114.75779	-3.06E-4	-4.49897E-4
579	0.0162	0.0125	-0.36905	-4.83097	-6.70007		1115.72	0.22554	0.24883	3881.40634	-2323	3881.40634	1599		3881.40634	-0.02769	-0.02758	-0.02759	-0.02744	-0.02753	-0.02737	-0.02757	-0.02743	-0.02748	-0.02729	-0.02799	-0.02799	2534.24493	-1.91E-7	6.16E-8	1.527E-7	5.449E-7	-2.478E-7	3.469E-7	-1.163E-7	2.54E-7	6.004E-7	-1.495E-7	3.106E-7	-9.01E-8		2184.19512	-1.12E-4	-9.2E-5	1.2E-4	2113.79347	-3.07E-4	-4.17569E-4
578	0.0162	0.0128	-0.37149	-5.0446	-6.73059		1116.69	0.22035	0.24457	3880.44202	-2663	3880.44202	2273		3880.44202	-0.02767	-0.02754	-0.02756	-0.02743	-0.02751	-0.02735	-0.02755	-0.02741	-0.02746	-0.02727	-0.02796	-0.02797	2533.28061	-3.153E-7	2.31E-8	-2.048E-7	5.165E-7	-3.014E-7	4.077E-7	-2.902E-7	2.339E-7	6.8E-7	8.87E-8	1.082E-7	-4.62E-8		2183.2308	-9.1E-5	-6.5E-5	1.27E-4	2112.82915	-3.14E-4	-4.00715E-4
577	0.017	0.0129	-0.37393	-5.19969	-6.85141		1117.65	0.21543	0.24055	3879.47769	-4325	3879.47769	3327		3879.47769	-0.02767	-0.02753	-0.02756	-0.02742	-0.02751	-0.02736	-0.02755	-0.02741	-0.02746	-0.02727	-0.02797	-0.02799	2532.31629	-2.243E-7	9.04E-8	-4.036E-7	4.372E-7	-1.542E-7	3.87E-7	-2.423E-7	3.031E-7	6.485E-7	2.25E-7	3.62E-8	1.168E-7		2182.26647	-1.08E-4	-5.3E-5	1.33E-4	2111.86483	-3.11E-4	-4.20381E-4
576	0.0172	0.0125	-0.37637	-5.39492	-6.94421		1118.62	0.21072	0.23671	3878.51337	-3457	3878.51337	1347		3878.51337	-0.02767	-0.02754	-0.02758	-0.02743	-0.02751	-0.02736	-0.02756	-0.02742	-0.02746	-0.02729	-0.02798	-0.02802	2531.35196	1.684E-7	2.793E-7	-3.179E-7	4.872E-7	2.153E-7	3.426E-7	-1.462E-7	5.67E-7	5.82E-7	3.29E-7	4.3E-8	3.417E-7		2181.30215	-1.29E-4	-7E-5	1.32E-4	2110.90051	-3.06E-4	-4.48859E-4
575	0.0173	0.0127	-0.37881	-5.48689	-6.99354		1119.58	0.20622	0.23305	3877.54904	1136	3877.54904	-2194		3877.54904	-0.02767	-0.02754	-0.02759	-0.02745	-0.0275	-0.02737	-0.02757	-0.02742	-0.02748	-0.02729	-0.02799	-0.02803	2530.38764	5.049E-7	5.969E-7	-1.035E-7	6.524E-7	4.907E-7	4.793E-7	-1.893E-7	9.479E-7	3.943E-7	6.757E-7	7.15E-8	4.594E-7		2180.33782	-1.17E-4	-7.1E-5	1.16E-4	2109.93619	-3.13E-4	-4.73555E-4
574	0.0174	0.013	-0.38125	-5.64742	-7.11561		1120.55	0.20201	0.22963	3876.58472	5642	3876.58472	-4333		3876.58472	-0.02766	-0.02754	-0.02757	-0.02745	-0.0275	-0.02737	-0.02757	-0.02742	-0.02749	-0.02729	-0.02799	-0.02802	2529.42331	7.806E-7	8.68E-7	2.563E-7	6.963E-7	6.217E-7	6.872E-7	-1.408E-7	1.2524E-6	1.802E-7	1.1602E-6	2.648E-7	5.904E-7		2179.3735	-1.06E-4	-6.4E-5	9.1E-5	2108.97188	-3.18E-4	-5.06999E-4
573	0.0175	0.0127	-0.38369	-5.76406	-7.19253		1121.51	0.19799	0.22636	3875.62039	7260	3875.62039	-3513		3875.62039	-0.02766	-0.02753	-0.02755	-0.02744	-0.02749	-0.02736	-0.02756	-0.0274	-0.02748	-0.02728	-0.02799	-0.02799	2528.45899	1.204E-6	9.882E-7	7.512E-7	6.291E-7	8.447E-7	8.115E-7	2.789E-7	1.4607E-6	1.206E-7	1.5363E-6	6.672E-7	9.206E-7		2178.40917	-1.27E-4	-9.7E-5	8.1E-5	2108.00756	-3.16E-4	-5.25076E-4
572	0.0171	0.013	-0.38614	-5.95762	-7.19421		1122.47	0.19414	0.2232	3874.65607	7787	3874.65607	-553		3874.65607	-0.02764	-0.02752	-0.02751	-0.02741	-0.02748	-0.02733	-0.02754	-0.02737	-0.02745	-0.02725	-0.02797	-0.02795	2527.49466	1.5084E-6	1.1727E-6	1.1926E-6	7.092E-7	1.2191E-6	1.0322E-6	8.614E-7	1.5935E-6	1.952E-7	1.7407E-6	1.1537E-6	1.2734E-6		2177.44485	-1.49E-4	-1.33E-4	9.5E-5	2107.04324	-3.15E-4	-5.22035E-4
571	0.0168	0.0132	-0.38858	-6.1031	-7.27531		1123.44	0.19052	0.22022	3873.69174	9445	3873.69174	3314		3873.69174	-0.02762	-0.02751	-0.0275	-0.02739	-0.02746	-0.02732	-0.02752	-0.02735	-0.02743	-0.02723	-0.02795	-0.02793	2526.53034	1.4892E-6	1.4869E-6	1.5107E-6	1.0139E-6	1.5183E-6	1.4453E-6	1.2612E-6	1.5964E-6	3.682E-7	1.7936E-6	1.4907E-6	1.3502E-6		2176.48052	-1.39E-4	-1.23E-4	1.2E-4	2106.07892	-3.16E-4	-5.24805E-4
570	0.017	0.0141	-0.39102	-6.23938	-7.33676		1124.4	0.18712	0.21741	3872.72742	11111	3872.72742	6294		3872.72742	-0.02761	-0.0275	-0.02749	-0.02739	-0.02745	-0.02732	-0.02751	-0.02734	-0.02741	-0.02723	-0.02794	-0.02793	2525.56601	1.4044E-6	1.6831E-6	1.7543E-6	1.3403E-6	1.5566E-6	1.7543E-6	1.4563E-6	1.4772E-6	6.751E-7	1.7617E-6	1.4862E-6	1.1573E-6		2175.5162	-1.07E-4	-9.6E-5	1.31E-4	2105.1146	-3.18E-4	-5.34432E-4
569	0.0174	0.0142	-0.39346	-6.34766	-7.3702		1125.37	0.18388	0.2147	3871.7631	11589	3871.76309	7514		3871.7631	-0.0276	-0.02748	-0.02747	-0.02737	-0.02743	-0.0273	-0.02749	-0.02732	-0.02738	-0.02721	-0.02792	-0.02789	2524.60169	1.4927E-6	1.6243E-6	1.9317E-6	1.5688E-6	1.399E-6	1.7535E-6	1.5761E-6	1.3156E-6	1.0849E-6	1.7387E-6	1.2577E-6	1.0113E-6		2174.55188	-8.3E-5	-8.6E-5	1.07E-4	2104.15028	-3.21E-4	-5.45525E-4
568	0.0178	0.0125	-0.3959	-6.49063	-7.42999		1126.33	0.18082	0.21211	3870.79877	11210	3870.79877	7136		3870.79877	-0.02758	-0.02745	-0.02743	-0.02733	-0.02739	-0.02727	-0.02746	-0.02729	-0.02734	-0.02717	-0.02788	-0.02784	2523.63736	1.6391E-6	1.3037E-6	1.8732E-6	1.6595E-6	1.179E-6	1.5844E-6	1.6251E-6	1.0654E-6	1.44E-6	1.6725E-6	1.0177E-6	1.0865E-6		2173.58755	-8.6E-5	-8.4E-5	7E-5	2103.18597	-3.18E-4	-5.61594E-4
567	0.0173	0.0115	-0.39834	-6.61186	-7.45172		1127.3	0.17796	0.20968	3869.83445	9115	3869.83445	6155		3869.83445	-0.02756	-0.02743	-0.02741	-0.02732	-0.02737	-0.02725	-0.02745	-0.02728	-0.02732	-0.02715	-0.02785	-0.02782	2522.67304	1.5813E-6	8.782E-7	1.5705E-6	1.5451E-6	1.0756E-6	1.3969E-6	1.6181E-6	7.216E-7	1.6893E-6	1.4888E-6	9.043E-7	1.3147E-6		2172.62323	-1.07E-4	-7.4E-5	6.1E-5	2102.22165	-3.11E-4	-5.69729E-4
566	0.0156	0.0124	-0.40078	-6.73644	-7.40532		1128.26	0.17522	0.20735	3868.87012	4897	3868.87012	5701		3868.87012	-0.02756	-0.02744	-0.02742	-0.02734	-0.02738	-0.02725	-0.02746	-0.02729	-0.02735	-0.02715	-0.02786	-0.02785	2521.70872	1.2856E-6	6.92E-7	1.311E-6	1.3984E-6	1.1647E-6	1.2307E-6	1.6322E-6	5.293E-7	1.9238E-6	1.2732E-6	9.204E-7	1.6055E-6		2171.6589	-1.16E-4	-5.7E-5	8.7E-5	2101.25733	-3.04E-4	-5.50783E-4
565	0.0159	0.0115	-0.40323	-6.78034	-7.45758		1129.22	0.17259	0.20512	3867.9058	2157	3867.9058	4765		3867.9058	-0.02756	-0.02745	-0.02744	-0.02735	-0.02738	-0.02725	-0.02747	-0.0273	-0.02737	-0.02716	-0.02786	-0.02788	2520.74439	9.73E-7	9.628E-7	1.1979E-6	1.5301E-6	1.3523E-6	1.1678E-6	1.6171E-6	7.025E-7	2.1403E-6	1.1461E-6	8.96E-7	1.8429E-6		2170.69458	-1.14E-4	-4.5E-5	1.08E-4	2100.29301	-3.02E-4	-5.09659E-4
564	0.0172	0.0125	-0.40567	-6.89614	-7.4187		1130.19	0.17013	0.20304	3866.94147	3304	3866.94147	3101		3866.94147	-0.02754	-0.02745	-0.02743	-0.02733	-0.02737	-0.02724	-0.02746	-0.0273	-0.02736	-0.02715	-0.02784	-0.02786	2519.78007	7.943E-7	1.537E-6	1.0757E-6	1.8041E-6	1.5718E-6	1.2922E-6	1.4882E-6	1.1709E-6	2.2044E-6	1.1546E-6	7.847E-7	1.8822E-6		2169.73025	-1.13E-4	-5.4E-5	1E-4	2099.32869	-3.13E-4	-4.82753E-4
563	0.0176	0.0149	-0.40811	-6.98602	-7.36728		1131.15	0.16785	0.20109	3865.97715	4641	3865.97715	4752		3865.97715	-0.02752	-0.02743	-0.02741	-0.0273	-0.02735	-0.02721	-0.02743	-0.02729	-0.02733	-0.02712	-0.02781	-0.02783	2518.81574	8.505E-7	2.0748E-6	9.438E-7	1.8681E-6	1.7994E-6	1.5936E-6	1.3805E-6	1.7169E-6	2.0723E-6	1.2636E-6	8.292E-7	1.7492E-6		2168.76593	-1.06E-4	-7.6E-5	7.7E-5	2098.36438	-3.37E-4	-4.88833E-4
562	0.0148	0.0139	-0.41055	-7.02782	-7.41619		1132.12	0.16567	0.19921	3865.01282	3815	3865.01282	11943		3865.01282	-0.0275	-0.0274	-0.02738	-0.02727	-0.02732	-0.02719	-0.02741	-0.02726	-0.0273	-0.0271	-0.0278	-0.02782	2517.85142	1.1999E-6	2.3885E-6	9.73E-7	1.7746E-6	1.9666E-6	1.9125E-6	1.4396E-6	2.1864E-6	1.8405E-6	1.3116E-6	1.2404E-6	1.6425E-6		2167.8016	-1.01E-4	-1E-4	6.4E-5	2097.40006	-3.49E-4	-5.07611E-4
561	0.0156	0.0141	-0.41299	-7.09555	-7.3932		1133.08	0.16362	0.19741	3864.0485	4498	3864.0485	17858		3864.0485	-0.02749	-0.02739	-0.02739	-0.02727	-0.0273	-0.0272	-0.0274	-0.02724	-0.0273	-0.0271	-0.02781	-0.02782	2516.88709	1.6113E-6	2.5137E-6	1.2114E-6	1.6936E-6	2.0552E-6	2.1123E-6	1.5848E-6	2.4512E-6	1.5966E-6	1.2274E-6	1.909E-6	1.6338E-6		2166.83728	-1.15E-4	-1.08E-4	7.5E-5	2096.43574	-3.4E-4	-5.33509E-4
560	0.0179	0.0141	-0.41543	-7.15365	-7.36686		1134.05	0.16169	0.19572	3863.08417	8192	3863.08417	16604		3863.08417	-0.02749	-0.02738	-0.02739	-0.02726	-0.02729	-0.0272	-0.0274	-0.02722	-0.0273	-0.0271	-0.02782	-0.02782	2515.92277	1.8378E-6	2.4079E-6	1.5393E-6	1.5964E-6	2.0898E-6	2.1249E-6	1.6452E-6	2.3388E-6	1.3481E-6	1.1228E-6	2.4913E-6	1.5859E-6		2165.87295	-1.32E-4	-8E-5	9.7E-5	2095.47142	-3.42E-4	-5.79618E-4
559	0.018	0.0135	-0.41787	-7.19964	-7.29872		1135.01	0.15987	0.19412	3862.11985	10499	3862.11985	14147		3862.11985	-0.02748	-0.02736	-0.02738	-0.02725	-0.02728	-0.02718	-0.02739	-0.0272	-0.02729	-0.02708	-0.0278	-0.0278	2514.95844	1.9441E-6	1.9782E-6	1.8251E-6	1.5198E-6	2.0559E-6	1.8948E-6	1.6284E-6	1.9296E-6	1.0872E-6	1.2188E-6	2.7521E-6	1.4129E-6		2164.90863	-1.25E-4	-4.8E-5	9.8E-5	2094.5071	-3.72E-4	-6.6172E-4
558	0.0166	0.0124	-0.42032	-7.23308	-7.27991		1135.97	0.15813	0.19263	3861.15553	8015	3861.15552	18316		3861.15553	-0.02746	-0.02735	-0.02735	-0.02723	-0.02728	-0.02716	-0.02737	-0.02719	-0.02727	-0.02707	-0.02778	-0.02779	2513.99412	1.9659E-6	1.4371E-6	1.9789E-6	1.4568E-6	1.9115E-6	1.4969E-6	1.6423E-6	1.5478E-6	8.65E-7	1.6045E-6	2.6527E-6	1.2058E-6		2163.94431	-1.04E-4	-5.9E-5	6.7E-5	2093.54278	-4.4E-4	-8.20223E-4
557	0.0175	0.0117	-0.42276	-7.30624	-7.21511		1136.94	0.15652	0.19128	3860.1912	1759	3860.1912	25212		3860.1912	-0.02743	-0.02733	-0.02734	-0.02722	-0.02727	-0.02714	-0.02735	-0.02718	-0.02725	-0.02705	-0.02777	-0.02778	2513.02979	1.8389E-6	1.0502E-6	2.0073E-6	1.2511E-6	1.6498E-6	1.0592E-6	1.7039E-6	1.2958E-6	8.496E-7	1.9316E-6	2.2972E-6	1.1736E-6		2162.97998	-9.4E-5	-1E-4	4.4E-5	2092.57847	-5.6E-4	-0.00111
556	0.0184	0.0134	-0.4252	-7.29328	-7.16118		1137.9	0.15504	0.19005	3859.22688	-4961	3859.22688	24131		3859.22688	-0.02741	-0.02731	-0.02732	-0.02721	-0.02726	-0.02713	-0.02733	-0.02718	-0.02723	-0.02704	-0.02775	-0.02777	2512.06547	1.5887E-6	8.148E-7	1.9214E-6	9.342E-7	1.3531E-6	6.623E-7	1.714E-6	1.0648E-6	1.1288E-6	1.8706E-6	1.8216E-6	1.3603E-6		2162.01566	-9.9E-5	-1.17E-4	6.5E-5	2091.61415	-7.3E-4	-0.00157
555	0.0171	0.0127	-0.42764	-7.30875	-7.04538		1138.87	0.15366	0.18893	3858.26255	-8395	3858.26255	12805		3858.26255	-0.02741	-0.02729	-0.02731	-0.02718	-0.02724	-0.02711	-0.02732	-0.02718	-0.02722	-0.02701	-0.02773	-0.02774	2511.10115	1.2585E-6	7.006E-7	1.7427E-6	7.656E-7	1.062E-6	4.498E-7	1.5325E-6	8.879E-7	1.5171E-6	1.594E-6	1.2661E-6	1.5093E-6		2161.05133	-1.14E-4	-8.5E-5	1.02E-4	2090.64983	-9.24E-4	-0.00214
554	0.0175	0.0135	-0.43008	-7.40114	-7.0575		1139.83	0.1524	0.18792	3857.29823	-7707	3857.29823	-4647		3857.29823	-0.0274	-0.02728	-0.0273	-0.02716	-0.02723	-0.02709	-0.02731	-0.02718	-0.02722	-0.027	-0.02772	-0.02771	2510.13682	1.0066E-6	7.185E-7	1.6024E-6	8.91E-7	7.377E-7	5.711E-7	1.2308E-6	8.806E-7	1.762E-6	1.3506E-6	7.338E-7	1.4264E-6		2160.08701	-1.31E-4	-4.3E-5	1.14E-4	2089.68551	-0.00111	-0.00268
553	0.0177	0.0154	-0.43252	-7.33969	-7.06795		1140.8	0.15121	0.18704	3856.3339	-5033	3856.3339	-25261		3856.3339	-0.02739	-0.02725	-0.02727	-0.02712	-0.0272	-0.02706	-0.02728	-0.02714	-0.02719	-0.02698	-0.02768	-0.02767	2509.1725	1.0264E-6	8.708E-7	1.5194E-6	1.194E-6	5.003E-7	9.674E-7	1.0294E-6	1.0298E-6	1.7447E-6	1.1826E-6	4.434E-7	1.2556E-6		2159.12268	-1.36E-4	-4.1E-5	1.06E-4	2088.72119	-0.00123	-0.00304
552	0.0156	0.0169	-0.43496	-7.37355	-6.89823		1141.76	0.1501	0.18626	3855.36958	-2979	3855.36958	-41845		3855.36958	-0.02734	-0.02719	-0.02718	-0.02705	-0.02714	-0.02699	-0.0272	-0.02704	-0.0271	-0.0269	-0.02757	-0.02758	2508.20817	1.2127E-6	1.0758E-6	1.3562E-6	1.4122E-6	4.569E-7	1.4029E-6	9.328E-7	1.2089E-6	1.4977E-6	1.1163E-6	4.658E-7	1.2626E-6		2158.15836	-1.31E-4	-6.9E-5	9.8E-5	2087.75687	-0.00126	-0.00309
551	0.0163	0.0172	-0.43741	-7.34554	-6.8397		1142.72	0.14908	0.18556	3854.40525	-2558	3854.40525	-44936		3854.40525	-0.02727	-0.02712	-0.0271	-0.02698	-0.02706	-0.02691	-0.02712	-0.02695	-0.02701	-0.02681	-0.02746	-0.02748	2507.24385	1.37E-6	1.1694E-6	1.1275E-6	1.503E-6	5.274E-7	1.6834E-6	8.872E-7	1.2944E-6	1.2088E-6	1.1725E-6	7.036E-7	1.4688E-6		2157.19403	-1.31E-4	-7.9E-5	9.2E-5	2086.79256	-0.00117	-0.0028
550	0.0164	0.0128	-0.43985	-7.36226	-6.82381		1143.69	0.14816	0.18492	3853.44093	-953	3853.44093	-36950		3853.44093	-0.02723	-0.02711	-0.02709	-0.02698	-0.02704	-0.0269	-0.02711	-0.02694	-0.02701	-0.02681	-0.02744	-0.02747	2506.27952	1.4815E-6	1.1643E-6	9.769E-7	1.6185E-6	6.616E-7	1.7144E-6	9.689E-7	1.2859E-6	1.0461E-6	1.3005E-6	1.0394E-6	1.6871E-6		2156.22971	-1.33E-4	-7E-5	9.4E-5	2085.82824	-9.91E-4	-0.00228
549	0.0156	0.0116	-0.44229	-7.33467	-6.68753		1144.65	0.14727	0.18428	3852.4766	4510	3852.4766	-28313		3852.4766	-0.02723	-0.02713	-0.02711	-0.027	-0.02706	-0.02692	-0.02714	-0.02696	-0.02704	-0.02684	-0.02747	-0.0275	2505.3152	1.5527E-6	1.1344E-6	9.323E-7	1.6154E-6	8.958E-7	1.4729E-6	1.1501E-6	1.1698E-6	9.65E-7	1.3996E-6	1.3514E-6	1.7661E-6		2155.26538	-1.25E-4	-6.7E-5	1.08E-4	2084.86392	-7.87E-4	-0.00169
548	0.0147	0.0139	-0.44473	-7.35306	-6.64447		1145.62	0.14638	0.18366	3851.51228	10225	3851.51228	-18654		3851.51228	-0.02724	-0.02713	-0.02712	-0.02701	-0.02707	-0.02693	-0.02715	-0.02697	-0.02706	-0.02686	-0.0275	-0.02753	2504.35087	1.5106E-6	9.698E-7	8.911E-7	1.3331E-6	1.2697E-6	1.0737E-6	1.2975E-6	9.402E-7	8.526E-7	1.3908E-6	1.5287E-6	1.6129E-6		2154.30106	-1.09E-4	-7.9E-5	1.17E-4	2083.8996	-6.02E-4	-0.00112
547	0.0145	0.0181	-0.44717	-7.21971	-6.56462		1146.58	0.14552	0.18304	3850.54796	11889	3850.54795	907		3850.54796	-0.02724	-0.02713	-0.02712	-0.02702	-0.02708	-0.02694	-0.02716	-0.02698	-0.02707	-0.02686	-0.02752	-0.02754	2503.38655	1.2545E-6	7.005E-7	7.831E-7	1.0262E-6	1.6635E-6	7.779E-7	1.3477E-6	7.906E-7	7.565E-7	1.3671E-6	1.5272E-6	1.2437E-6		2153.33674	-1E-4	-1.07E-4	1.17E-4	2082.93528	-4.55E-4	-6.64132E-4
546	0.0175	0.0154	-0.44961	-7.2983	-6.49899		1147.55	0.14467	0.18237	3849.58363	11675	3849.58363	27554		3849.58363	-0.02724	-0.02713	-0.02712	-0.02701	-0.02708	-0.02693	-0.02715	-0.02698	-0.02706	-0.02686	-0.02755	-0.02755	2502.42222	8.376E-7	5.993E-7	7.097E-7	8.952E-7	1.8358E-6	7.353E-7	1.2782E-6	7.786E-7	8.144E-7	1.3708E-6	1.3226E-6	8.496E-7		2152.37241	-1.04E-4	-1.19E-4	1.09E-4	2081.97096	-3.69E-4	-3.75392E-4
545	0.0188	0.0159	-0.45205	-7.22974	-6.42959		1148.51	0.1438	0.18162	3848.61931	13117	3848.61931	46161		3848.61931	-0.02724	-0.02712	-0.02712	-0.027	-0.02708	-0.02691	-0.02714	-0.02697	-0.02705	-0.02686	-0.02755	-0.02754	2501.4579	5.292E-7	7.175E-7	8.354E-7	7.896E-7	1.7108E-6	7.837E-7	1.1575E-6	6.991E-7	1.009E-6	1.154E-6	9.531E-7	5.996E-7		2151.40809	-1.06E-4	-1.07E-4	8.5E-5	2081.00665	-3.45E-4	-3.25584E-4
544	0.017	0.0155	-0.4545	-7.17289	-6.4066		1149.47	0.14294	0.18086	3847.65498	14776	3847.65498	49612		3847.65498	-0.02723	-0.02709	-0.02711	-0.027	-0.02706	-0.02689	-0.02712	-0.02695	-0.02703	-0.02686	-0.02754	-0.02753	2500.49358	4.567E-7	8.79E-7	1.0671E-6	5.935E-7	1.4601E-6	7.925E-7	1.0671E-6	6.178E-7	1.1814E-6	6.681E-7	6.121E-7	4.883E-7		2150.44376	-1.1E-4	-1E-4	5.5E-5	2080.04233	-3.96E-4	-5.85296E-4
543	0.0157	0.015	-0.45694	-7.18334	-6.31714		1150.44	0.14209	0.18013	3846.69066	13895	3846.69066	43603		3846.69066	-0.0272	-0.02707	-0.0271	-0.02698	-0.02704	-0.02688	-0.0271	-0.02694	-0.02701	-0.02683	-0.02753	-0.02751	2499.52925	4.279E-7	9.896E-7	1.1283E-6	4.633E-7	1.2136E-6	8.837E-7	9.333E-7	7.815E-7	1.169E-6	2.445E-7	4.299E-7	4.2E-7		2149.47944	-1.27E-4	-1.04E-4	4E-5	2079.07801	-5.33E-4	-0.00109
542	0.0165	0.0149	-0.45938	-7.15073	-6.31129		1151.4	0.14122	0.17938	3845.72633	11039	3845.72633	32981		3845.72633	-0.02716	-0.02704	-0.02707	-0.02695	-0.02702	-0.02686	-0.02708	-0.02692	-0.02699	-0.02679	-0.0275	-0.02748	2498.56493	3.569E-7	1.0375E-6	1.0015E-6	5.269E-7	9.459E-7	1.0643E-6	7.953E-7	1.0615E-6	9.692E-7	8.4E-8	4.146E-7	4.014E-7		2148.51511	-1.35E-4	-1.04E-4	3.9E-5	2078.11369	-6.9E-4	-0.0016
541	0.0158	0.0134	-0.46182	-7.15491	-6.18754		1152.37	0.14037	0.17859	3844.76201	8666	3844.76201	20889		3844.76201	-0.02713	-0.02702	-0.02703	-0.02692	-0.027	-0.02684	-0.02706	-0.02689	-0.02696	-0.02676	-0.02747	-0.02745	2497.6006	3.433E-7	1.012E-6	8.638E-7	6.119E-7	6.972E-7	1.0774E-6	7.987E-7	1.1558E-6	8.393E-7	9.29E-8	6.318E-7	5.156E-7		2147.55079	-1.23E-4	-8.8E-5	4.7E-5	2077.14937	-7.29E-4	-0.00177
540	0.0164	0.0146	-0.46426	-7.07799	-6.03579		1153.33	0.13956	0.17777	3843.79768	8471	3843.79768	11082		3843.79768	-0.02712	-0.02699	-0.02701	-0.02691	-0.02697	-0.02682	-0.02705	-0.02686	-0.02693	-0.02674	-0.02745	-0.02744	2496.63628	3.554E-7	9.479E-7	7.415E-7	5.864E-7	5.108E-7	8.794E-7	8.667E-7	1.0668E-6	9.092E-7	2.267E-7	1.0032E-6	6.764E-7		2146.58646	-1.12E-4	-6.6E-5	7.1E-5	2076.18505	-5.6E-4	-0.00137
539	0.0184	0.0151	-0.4667	-7.03869	-6.08888		1154.3	0.13871	0.1769	3842.83336	9891	3842.83336	2664		3842.83336	-0.0271	-0.02698	-0.02699	-0.02689	-0.02693	-0.02679	-0.02703	-0.02684	-0.0269	-0.02671	-0.02742	-0.02742	2495.67195	3.386E-7	8.627E-7	5.558E-7	5.041E-7	3.423E-7	6.658E-7	8.853E-7	8.55E-7	9.14E-7	4.908E-7	1.2307E-6	7.237E-7		2145.62214	-1.06E-4	-6.4E-5	1.02E-4	2075.22074	-2.65E-4	-5.42026E-4
538	0.019	0.015	-0.46914	-7.07882	-5.98228		1155.26	0.13781	0.17596	3841.86903	10007	3841.86903	-7422		3841.86903	-0.02707	-0.02695	-0.02695	-0.02686	-0.0269	-0.02676	-0.027	-0.02682	-0.02687	-0.02667	-0.02738	-0.02739	2494.70763	4.476E-7	6.573E-7	3.761E-7	2.876E-7	2.651E-7	3.997E-7	8.663E-7	4.601E-7	7.552E-7	6.535E-7	1.2487E-6	7.622E-7		2144.65781	-9.9E-5	-8.1E-5	1.16E-4	2074.25642	-4.5E-5	1.48181E-4
537	0.0178	0.0147	-0.47159	-6.97013	-5.97936		1156.23	0.13688	0.17495	3840.90471	7145	3840.90471	-16098		3840.90471	-0.02704	-0.02692	-0.02692	-0.02682	-0.02688	-0.02673	-0.02696	-0.0268	-0.02685	-0.02664	-0.02734	-0.02736	2493.7433	6.809E-7	3.126E-7	2.737E-7	-6.39E-8	3.166E-7	4.27E-8	7.25E-7	-6E-9	5.987E-7	5.209E-7	1.1451E-6	8.625E-7		2143.69349	-9.6E-5	-1.06E-4	1.12E-4	2073.2921	-5.7E-5	1.67742E-4
536	0.0192	0.0142	-0.47403	-7.01194	-6.00569		1157.19	0.13593	0.17387	3839.94039	2518	3839.94038	-16617		3839.94039	-0.02701	-0.0269	-0.02688	-0.02678	-0.02685	-0.0267	-0.02692	-0.02677	-0.02683	-0.0266	-0.0273	-0.02732	2492.77898	6.674E-7	-4.18E-8	1.262E-7	-2.728E-7	2.845E-7	-1.687E-7	4.22E-7	-2.915E-7	4.118E-7	2.922E-7	7.706E-7	8.008E-7		2142.72917	-9.1E-5	-1.2E-4	1.12E-4	2072.32778	-2.73E-4	-4.36314E-4
535	0.0182	0.0182	-0.47647	-6.91202	-5.89073		1158.15	0.13493	0.17267	3838.97606	-1222	3838.97606	-9691		3838.97606	-0.02696	-0.02685	-0.02683	-0.02672	-0.02679	-0.02665	-0.02686	-0.02671	-0.02676	-0.02654	-0.02723	-0.02726	2491.81465	3.283E-7	-3.114E-7	-1.69E-8	-2.072E-7	8.63E-8	-1.889E-7	1.519E-7	-3.946E-7	1.73E-7	1.773E-7	1.853E-7	5.461E-7		2141.76484	-7.3E-5	-1.13E-4	1.18E-4	2071.36346	-4.74E-4	-0.00102
534	0.0185	0.0189	-0.47891	-6.93794	-5.83931		1159.12	0.13388	0.17138	3838.01174	-1927	3838.01174	-4676		3838.01174	-0.02692	-0.02681	-0.02679	-0.02669	-0.02674	-0.0266	-0.02681	-0.02667	-0.02671	-0.02649	-0.02717	-0.02721	2490.85033	1.045E-7	-5.163E-7	1.172E-7	-6.99E-8	-1.16E-8	-2.64E-7	3.92E-8	-5.248E-7	1.93E-8	3.82E-8	-2.01E-7	3.198E-7		2140.80052	-5.9E-5	-9.5E-5	1.15E-4	2070.39915	-4.69E-4	-0.00102
533	0.0187	0.0181	-0.48135	-6.88736	-5.83931		1160.08	0.13281	0.17002	3837.04741	-375	3837.04741	-4942		3837.04741	-0.02692	-0.0268	-0.0268	-0.02669	-0.02674	-0.02659	-0.02681	-0.02668	-0.0267	-0.0265	-0.02719	-0.02722	2489.88601	1.987E-7	-7.661E-7	4.707E-7	-5.84E-8	1.216E-7	-5.093E-7	-1.2E-9	-6.366E-7	-9.13E-8	-3.208E-7	-3.021E-7	1.257E-7		2139.83619	-6.8E-5	-8.5E-5	9.9E-5	2069.43483	-2.93E-4	-4.91616E-4
532	0.0182	0.0174	-0.48379	-6.856	-5.79667		1161.05	0.1317	0.16854	3836.08309	1379	3836.08309	-3041		3836.08309	-0.02691	-0.0268	-0.02681	-0.02669	-0.02674	-0.02659	-0.02682	-0.02669	-0.0267	-0.02651	-0.02721	-0.02724	2488.92168	3.285E-7	-1.0506E-6	6.359E-7	-1.876E-7	2.846E-7	-8.512E-7	-9.45E-8	-5.167E-7	-2.465E-7	-7.906E-7	-3.486E-7	-1.87E-7		2138.87187	-9E-5	-8.5E-5	7.6E-5	2068.47051	-1.1E-4	6.69951E-5
531	0.0186	0.0184	-0.48623	-6.82423	-5.73145		1162.01	0.13053	0.16694	3835.11876	3188	3835.11876	4904		3835.11876	-0.02689	-0.02677	-0.02679	-0.02666	-0.02673	-0.02658	-0.0268	-0.02667	-0.02668	-0.0265	-0.02719	-0.02721	2487.95736	2.141E-7	-1.1748E-6	3.704E-7	-3.827E-7	2.209E-7	-1.1045E-6	-3.359E-7	-2.618E-7	-4.17E-7	-1.0707E-6	-4.608E-7	-6.125E-7		2137.90754	-1.14E-4	-9.1E-5	6.2E-5	2067.50619	-2.7E-5	3.26609E-4
530	0.0156	0.0174	-0.48868	-6.80082	-5.68839		1162.98	0.12934	0.16529	3834.15444	5197	3834.15444	12906		3834.15444	-0.02687	-0.02674	-0.02675	-0.02663	-0.02671	-0.02655	-0.02679	-0.02663	-0.02666	-0.02648	-0.02718	-0.02718	2486.99303	-8.85E-8	-1.1061E-6	-1.738E-7	-6.002E-7	-1.626E-7	-1.1438E-6	-7.277E-7	-1.863E-7	-5.852E-7	-1.15E-6	-5.271E-7	-1.0123E-6		2136.94322	-1.37E-4	-1.05E-4	7.4E-5	2066.54187	-4.6E-5	3.0767E-4
529	0.0161	0.0173	-0.49112	-6.69924	-5.72435		1163.94	0.12815	0.16362	3833.19011	6845	3833.19011	13286		3833.19011	-0.02684	-0.02671	-0.02671	-0.0266	-0.02668	-0.02653	-0.02677	-0.02659	-0.02663	-0.02646	-0.02715	-0.02714	2486.02871	-3.526E-7	-1.0649E-6	-6.548E-7	-8.867E-7	-6.981E-7	-1.1089E-6	-1.0339E-6	-4.073E-7	-7.207E-7	-1.3409E-6	-4.048E-7	-1.2492E-6		2135.97889	-1.44E-4	-1.24E-4	9.5E-5	2065.57755	-1.05E-4	1.73079E-4
528	0.0176	0.0161	-0.49356	-6.72474	-5.67794		1164.9	0.12694	0.16191	3832.22579	8321	3832.22579	4911		3832.22579	-0.0268	-0.02668	-0.02669	-0.02657	-0.02665	-0.0265	-0.02674	-0.02656	-0.0266	-0.02641	-0.02711	-0.02709	2485.06438	-5.764E-7	-1.1058E-6	-9.835E-7	-1.1789E-6	-1.2162E-6	-1.068E-6	-1.0939E-6	-7.711E-7	-8.825E-7	-1.6028E-6	-3.505E-7	-1.3218E-6		2135.01457	-1.32E-4	-1.38E-4	1.02E-4	2064.61324	-1.62E-4	3.27534E-5
527	0.0182	0.0158	-0.496	-6.6984	-5.68505		1165.87	0.12577	0.16021	3831.26146	10108	3831.26146	-4324		3831.26146	-0.02677	-0.02667	-0.02668	-0.02656	-0.02664	-0.02649	-0.02671	-0.02654	-0.0266	-0.02639	-0.02708	-0.02708	2484.10006	-9.185E-7	-1.0777E-6	-1.338E-6	-1.3866E-6	-1.6357E-6	-9.186E-7	-1.1525E-6	-1.0957E-6	-1.1241E-6	-1.5551E-6	-6.975E-7	-1.3386E-6		2134.05024	-1.19E-4	-1.49E-4	1.02E-4	2063.64892	-2.07E-4	-9.2962E-5
526	0.0168	0.0203	-0.49844	-6.67039	-5.67627		1166.83	0.12462	0.15854	3830.29714	12200	3830.29714	-6378		3830.29714	-0.02677	-0.02666	-0.02667	-0.02655	-0.02663	-0.02648	-0.02668	-0.02652	-0.02661	-0.02638	-0.02707	-0.02709	2483.13573	-1.2909E-6	-9.716E-7	-1.6506E-6	-1.5471E-6	-1.8045E-6	-7.226E-7	-1.3134E-6	-1.273E-6	-1.2229E-6	-1.1539E-6	-1.1916E-6	-1.2989E-6		2133.08592	-1.18E-4	-1.53E-4	9.6E-5	2062.6846	-2.36E-4	-2.16131E-4
525	0.0175	0.0179	-0.50088	-6.70634	-5.60855		1167.8	0.12351	0.15692	3829.33281	14686	3829.33281	-1348		3829.33281	-0.02675	-0.02664	-0.02665	-0.02653	-0.0266	-0.02645	-0.02665	-0.0265	-0.0266	-0.02636	-0.02706	-0.02708	2482.17141	-1.5406E-6	-8.648E-7	-1.6821E-6	-1.5533E-6	-1.7242E-6	-5.689E-7	-1.2794E-6	-1.2921E-6	-1.0817E-6	-6.468E-7	-1.4699E-6	-1.1385E-6		2132.1216	-1.25E-4	-1.45E-4	7.9E-5	2061.72028	-2.54E-4	-3.29918E-4
524	0.0193	0.0189	-0.50332	-6.64949	-5.64074		1168.76	0.12243	0.15536	3828.36849	16232	3828.36849	6445		3828.36849	-0.02673	-0.02661	-0.02662	-0.02649	-0.02657	-0.02642	-0.02664	-0.02648	-0.02657	-0.02634	-0.02704	-0.02705	2481.20708	-1.737E-6	-7.524E-7	-1.4516E-6	-1.2702E-6	-1.5357E-6	-4.658E-7	-9.702E-7	-1.2623E-6	-9.167E-7	-1.576E-7	-1.5195E-6	-8.583E-7		2131.15727	-1.25E-4	-1.33E-4	7.7E-5	2060.75596	-2.72E-4	-4.19424E-4
523	0.0178	0.0198	-0.50577	-6.69046	-5.65328		1169.73	0.1214	0.15387	3827.40417	13987	3827.40417	14217		3827.40417	-0.0267	-0.02657	-0.0266	-0.02646	-0.02653	-0.02639	-0.02661	-0.02645	-0.02654	-0.02631	-0.02701	-0.02701	2480.24276	-1.8881E-6	-6.726E-7	-1.1755E-6	-8.298E-7	-1.2127E-6	-4.701E-7	-6.93E-7	-1.2148E-6	-8.431E-7	2.345E-7	-1.301E-6	-5.659E-7		2130.19295	-1.14E-4	-1.17E-4	9.1E-5	2059.79164	-2.94E-4	-4.77316E-4
522	0.016	0.0195	-0.50821	-6.63151	-5.61398		1170.69	0.12041	0.15243	3826.43984	8242	3826.43984	19956		3826.43984	-0.02667	-0.02652	-0.02658	-0.02643	-0.02649	-0.02636	-0.02659	-0.02641	-0.02648	-0.02628	-0.02697	-0.02697	2479.27844	-1.7794E-6	-7.611E-7	-9.931E-7	-5.139E-7	-7.156E-7	-6.309E-7	-6.316E-7	-1.0508E-6	-7.921E-7	3.596E-7	-8.543E-7	-3.943E-7		2129.22862	-1.06E-4	-9.6E-5	8.6E-5	2058.82733	-3.1E-4	-5.02249E-4
521	0.0191	0.019	-0.51065	-6.56212	-5.53246		1171.65	0.11945	0.15103	3825.47552	2357	3825.47552	22316		3825.47552	-0.02662	-0.02648	-0.02654	-0.0264	-0.02647	-0.02633	-0.02656	-0.02638	-0.02643	-0.02627	-0.02694	-0.02694	2478.31411	-1.3064E-6	-9.503E-7	-8.538E-7	-4.703E-7	-2.129E-7	-8.866E-7	-6.62E-7	-8.141E-7	-7.136E-7	1.783E-7	-5.224E-7	-3.234E-7		2128.2643	-1.1E-4	-8.7E-5	7E-5	2057.86301	-3.06E-4	-5.08522E-4
520	0.0199	0.0195	-0.51309	-6.59305	-5.62443		1172.62	0.11854	0.1497	3824.51119	-2202	3824.51119	22589		3824.51119	-0.02658	-0.02645	-0.0265	-0.02637	-0.02645	-0.0263	-0.02652	-0.02635	-0.0264	-0.02623	-0.02691	-0.02691	2477.34979	-7.316E-7	-9.721E-7	-7.37E-7	-6.176E-7	2.09E-8	-1.0751E-6	-6.753E-7	-7.089E-7	-6.42E-7	-1.726E-7	-4.878E-7	-3.074E-7		2127.29997	-1.19E-4	-1.01E-4	7.7E-5	2056.89869	-2.88E-4	-5.2101E-4
519	0.0196	0.0189	-0.51553	-6.53369	-5.58137		1173.58	0.11768	0.14841	3823.54687	-5117	3823.54687	21192		3823.54687	-0.02655	-0.02643	-0.02646	-0.02633	-0.0264	-0.02627	-0.02647	-0.02631	-0.02637	-0.02618	-0.02688	-0.02688	2476.38546	-4.273E-7	-8.087E-7	-7.612E-7	-7.979E-7	-1.298E-7	-1.0653E-6	-7.098E-7	-7.854E-7	-6.569E-7	-6.194E-7	-5.706E-7	-3.489E-7		2126.33565	-1.28E-4	-1.25E-4	1.01E-4	2055.93437	-2.76E-4	-5.38202E-4
518	0.0194	0.0185	-0.51797	-6.54581	-5.66498		1174.55	0.11685	0.14712	3822.58254	-5438	3822.58254	13986		3822.58254	-0.02652	-0.02639	-0.02642	-0.02628	-0.02634	-0.02621	-0.02641	-0.02625	-0.02633	-0.02612	-0.02682	-0.02682	2475.42114	-4.38E-7	-7.236E-7	-8.945E-7	-8.213E-7	-4.752E-7	-9.778E-7	-7.796E-7	-9.258E-7	-8.178E-7	-1.221E-6	-5.807E-7	-4.218E-7		2125.37132	-1.38E-4	-1.39E-4	1.17E-4	2054.97005	-2.75E-4	-5.32829E-4
517	0.0191	0.0183	-0.52041	-6.57048	-5.67627		1175.51	0.1161	0.14589	3821.61822	-2801	3821.61822	-266		3821.61822	-0.02648	-0.02635	-0.02637	-0.02624	-0.02628	-0.02616	-0.02635	-0.02621	-0.02629	-0.02606	-0.02676	-0.02676	2474.45681	-5.982E-7	-8.511E-7	-9.872E-7	-6.184E-7	-8.156E-7	-1.0261E-6	-8.138E-7	-9.778E-7	-1.0536E-6	-1.8664E-6	-6.338E-7	-5.281E-7		2124.407	-1.51E-4	-1.36E-4	1.15E-4	2054.00573	-2.84E-4	-5.07851E-4
516	0.0182	0.018	-0.52285	-6.52073	-5.6654		1176.48	0.11542	0.14474	3820.65389	1983	3820.65389	-11778		3820.65389	-0.02644	-0.02631	-0.02634	-0.02621	-0.02625	-0.02613	-0.02632	-0.02619	-0.02625	-0.02604	-0.02673	-0.02674	2473.49249	-8.952E-7	-1.1114E-6	-1.0665E-6	-4.852E-7	-1.206E-6	-1.2227E-6	-8.989E-7	-8.72E-7	-1.2157E-6	-2.2031E-6	-9.19E-7	-6.806E-7		2123.44267	-1.55E-4	-1.16E-4	1.11E-4	2053.04142	-2.96E-4	-4.82627E-4
515	0.018	0.0183	-0.5253	-6.57257	-5.67209		1177.44	0.11479	0.14368	3819.68957	6283	3819.68957	-13127		3819.68957	-0.02641	-0.02628	-0.02632	-0.0262	-0.02623	-0.02613	-0.02631	-0.02618	-0.02623	-0.02604	-0.02672	-0.02674	2472.52816	-1.2544E-6	-1.3914E-6	-1.0884E-6	-8.08E-7	-1.5722E-6	-1.4251E-6	-1.1355E-6	-8.243E-7	-1.2327E-6	-2.1149E-6	-1.1936E-6	-7.857E-7		2122.47835	-1.44E-4	-9.1E-5	1.21E-4	2052.0771	-3.08E-4	-4.51685E-4
514	0.0187	0.0204	-0.52774	-6.55125	-5.64659		1178.4	0.11421	0.14273	3818.72524	7778	3818.72524	-11623		3818.72524	-0.02639	-0.02626	-0.02631	-0.02617	-0.02622	-0.02611	-0.02631	-0.02615	-0.02622	-0.02603	-0.02671	-0.02673	2471.56384	-1.4764E-6	-1.5612E-6	-9.272E-7	-1.4788E-6	-1.6946E-6	-1.4816E-6	-1.3773E-6	-1.0967E-6	-1.1849E-6	-1.8061E-6	-1.1391E-6	-7.981E-7		2121.51403	-1.22E-4	-8.2E-5	1.32E-4	2051.11278	-3.21E-4	-4.24737E-4
513	0.0174	0.0206	-0.53018	-6.55334	-5.66874		1179.37	0.11373	0.14192	3817.76092	7605	3817.76092	-11603		3817.76092	-0.02635	-0.02623	-0.02626	-0.02611	-0.02618	-0.02604	-0.02627	-0.02609	-0.02617	-0.02599	-0.02665	-0.02667	2470.59951	-1.6246E-6	-1.4901E-6	-7.948E-7	-1.8774E-6	-1.5871E-6	-1.3571E-6	-1.5538E-6	-1.4981E-6	-1.204E-6	-1.3932E-6	-9.296E-7	-8.61E-7		2120.5497	-9.2E-5	-8.9E-5	1.19E-4	2050.14846	-3.23E-4	-4.15597E-4
512	0.0174	0.0202	-0.53262	-6.51153	-5.66749		1180.33	0.1133	0.14122	3816.7966	8340	3816.7966	-6816		3816.7966	-0.02629	-0.02617	-0.02618	-0.02604	-0.02611	-0.02596	-0.02619	-0.02601	-0.02609	-0.02591	-0.02656	-0.02657	2469.63519	-1.8306E-6	-1.2664E-6	-9.579E-7	-1.6975E-6	-1.3516E-6	-1.2114E-6	-1.7379E-6	-1.6105E-6	-1.1918E-6	-9.139E-7	-8.265E-7	-1.0407E-6		2119.58538	-6.3E-5	-1.1E-4	1.04E-4	2049.18414	-3.13E-4	-4.17459E-4
511	0.0207	0.0207	-0.53506	-6.56003	-5.61941		1181.3	0.11288	0.14056	3815.83227	10310	3815.83227	1982		3815.83227	-0.02624	-0.02613	-0.02613	-0.026	-0.02607	-0.02591	-0.02613	-0.02598	-0.02605	-0.02585	-0.02651	-0.02652	2468.67086	-1.8606E-6	-1.1569E-6	-1.3016E-6	-1.3386E-6	-1.0004E-6	-1.1838E-6	-1.7881E-6	-1.3926E-6	-9.316E-7	-5.726E-7	-7.809E-7	-1.2525E-6		2118.62105	-6.7E-5	-1.4E-4	1.08E-4	2048.21983	-3E-4	-4.37551E-4
510	0.0184	0.0214	-0.5375	-6.51947	-5.69466		1182.26	0.11249	0.13996	3814.86795	11785	3814.86795	6904		3814.86795	-0.02622	-0.02611	-0.02612	-0.02599	-0.02607	-0.0259	-0.0261	-0.02598	-0.02606	-0.02584	-0.02652	-0.02653	2467.70654	-1.4413E-6	-1.2001E-6	-1.5014E-6	-1.205E-6	-6.176E-7	-1.2243E-6	-1.5061E-6	-1.1281E-6	-5.444E-7	-5.429E-7	-7.88E-7	-1.4541E-6		2117.65673	-9.7E-5	-1.6E-4	1.06E-4	2047.25551	-2.8E-4	-4.65883E-4
509	0.0187	0.0207	-0.53994	-6.53703	-5.7419		1183.23	0.11215	0.1394	3813.90362	11455	3813.90362	7919		3813.90362	-0.0262	-0.02609	-0.02611	-0.02598	-0.02607	-0.02589	-0.02609	-0.02598	-0.02605	-0.02584	-0.02652	-0.02654	2466.74222	-8.191E-7	-1.2157E-6	-1.4008E-6	-1.2015E-6	-4.367E-7	-1.1842E-6	-1.0383E-6	-1.0024E-6	-3.524E-7	-6.952E-7	-9.896E-7	-1.6224E-6		2116.6924	-1.2E-4	-1.45E-4	9.1E-5	2046.29119	-2.5E-4	-4.48449E-4
508	0.0188	0.0203	-0.54239	-6.49063	-5.7766		1184.19	0.11181	0.13885	3812.9393	8796	3812.9393	9556		3812.9393	-0.02617	-0.02607	-0.02608	-0.02595	-0.02604	-0.02586	-0.02608	-0.02595	-0.02602	-0.02582	-0.02651	-0.02652	2465.77789	-5.173E-7	-1.1971E-6	-1.1798E-6	-1.1442E-6	-5.728E-7	-1.0179E-6	-6.86E-7	-1.0052E-6	-4.341E-7	-8.75E-7	-1.2597E-6	-1.711E-6		2115.72808	-1.22E-4	-1.19E-4	8.8E-5	2045.32687	-2.2E-4	-3.50133E-4
507	0.0187	0.0198	-0.54483	-6.48645	-5.72393		1185.15	0.11147	0.13828	3811.97497	4495	3811.97497	11784		3811.97497	-0.02615	-0.02604	-0.02605	-0.02592	-0.02601	-0.02584	-0.02607	-0.02593	-0.02597	-0.02579	-0.02647	-0.02648	2464.81357	-6.427E-7	-1.1762E-6	-1.0771E-6	-1.0728E-6	-8.256E-7	-8.924E-7	-5.556E-7	-9.929E-7	-7.012E-7	-1.0652E-6	-1.3177E-6	-1.688E-6		2114.76375	-1.09E-4	-1.25E-4	1.04E-4	2044.36255	-1.77E-4	-1.7006E-4
506	0.0189	0.0195	-0.54727	-6.54456	-5.76155		1186.12	0.11111	0.13766	3811.01065	1430	3811.01065	13710		3811.01065	-0.02612	-0.02601	-0.02603	-0.0259	-0.02598	-0.02582	-0.02605	-0.0259	-0.02594	-0.02576	-0.02643	-0.02644	2463.84924	-8.811E-7	-1.0407E-6	-1.1107E-6	-9.582E-7	-1.0453E-6	-8.992E-7	-6.224E-7	-8.481E-7	-1.092E-6	-1.2023E-6	-1.2083E-6	-1.5592E-6		2113.79943	-9E-5	-1.5E-4	1.23E-4	2043.39823	-9.4E-5	1.02326E-4
505	0.0197	0.0231	-0.54971	-6.51947	-5.7164		1187.08	0.1107	0.13696	3810.04632	1598	3810.04632	16401		3810.04632	-0.02609	-0.02598	-0.026	-0.02588	-0.02595	-0.02579	-0.02602	-0.02588	-0.02592	-0.02573	-0.0264	-0.02641	2462.88492	-1.0513E-6	-8.564E-7	-1.2008E-6	-8.211E-7	-1.3215E-6	-9.385E-7	-8.523E-7	-6.745E-7	-1.4259E-6	-1.2439E-6	-1.1302E-6	-1.3463E-6		2112.8351	-8.6E-5	-1.64E-4	1.29E-4	2042.43392	3.7E-5	5.10214E-4
504	0.0204	0.024	-0.55215	-6.57382	-5.76448		1188.05	0.11023	0.13618	3809.082	4226	3809.082	20989		3809.082	-0.02604	-0.02593	-0.02594	-0.02583	-0.02589	-0.02574	-0.02596	-0.02583	-0.02588	-0.02568	-0.02635	-0.02636	2461.92059	-1.1093E-6	-8.214E-7	-1.2358E-6	-9.362E-7	-1.6129E-6	-1.0433E-6	-1.111E-6	-7.595E-7	-1.489E-6	-1.2683E-6	-1.0283E-6	-9.93E-7		2111.87078	-1.08E-4	-1.54E-4	1.26E-4	2041.4696	2.27E-4	0.0011
503	0.0217	0.024	-0.55459	-6.51947	-5.72142		1189.01	0.10974	0.13534	3808.11767	8788	3808.11767	23732		3808.11767	-0.02597	-0.02585	-0.02586	-0.02574	-0.0258	-0.02566	-0.02589	-0.02574	-0.02581	-0.0256	-0.02626	-0.02628	2460.95627	-9.378E-7	-8.359E-7	-1.1216E-6	-1.2471E-6	-1.7412E-6	-1.1304E-6	-1.2196E-6	-1.1296E-6	-1.3476E-6	-1.2714E-6	-8.325E-7	-5.585E-7		2110.90645	-1.21E-4	-1.13E-4	1.22E-4	2040.50528	4.59E-4	0.00185
502	0.0226	0.023	-0.55703	-6.45384	-5.82551		1189.98	0.10921	0.13446	3807.15335	13359	3807.15335	16952		3807.15335	-0.02592	-0.0258	-0.0258	-0.02568	-0.02574	-0.02559	-0.02583	-0.02568	-0.02575	-0.02554	-0.02619	-0.02622	2459.99194	-7.019E-7	-7.461E-7	-9.895E-7	-1.3267E-6	-1.6852E-6	-9.509E-7	-1.2846E-6	-1.4141E-6	-1.246E-6	-1.1016E-6	-7.051E-7	-4.069E-7		2109.94213	-1.01E-4	-6.4E-5	1.22E-4	2039.54096	6.79E-4	0.00259
501	0.0224	0.0218	-0.55948	-6.54121	-5.93086		1190.94	0.10866	0.13354	3806.18903	13749	3806.18903	3837		3806.18903	-0.02589	-0.02577	-0.02578	-0.02567	-0.02572	-0.02557	-0.0258	-0.02566	-0.02573	-0.02552	-0.02618	-0.02621	2459.02762	-7.09E-7	-6.749E-7	-9.382E-7	-1.0305E-6	-1.4313E-6	-6.243E-7	-1.3232E-6	-1.3417E-6	-1.1822E-6	-7.033E-7	-6.599E-7	-5.995E-7		2108.97781	-7.8E-5	-5.2E-5	1.2E-4	2038.57664	8.43E-4	0.00313
500	0.0228	0.0229	-0.56192	-6.52491	-5.91707		1191.91	0.10812	0.13266	3805.2247	9810	3805.2247	-6092		3805.2247	-0.02585	-0.02575	-0.02575	-0.02564	-0.0257	-0.02554	-0.02576	-0.02563	-0.02569	-0.0255	-0.02616	-0.02619	2458.06329	-9.055E-7	-7.897E-7	-8.333E-7	-6.699E-7	-9.988E-7	-4.488E-7	-1.004E-6	-1.0397E-6	-9.507E-7	-2.62E-7	-5.854E-7	-6.956E-7		2108.01348	-7.7E-5	-6.7E-5	1.13E-4	2037.61232	9.51E-4	0.00347
499	0.0227	0.0244	-0.56436	-6.47725	-5.90954		1192.87	0.1076	0.13183	3804.26038	5232	3804.26038	-11750		3804.26038	-0.0258	-0.02571	-0.0257	-0.02558	-0.02565	-0.0255	-0.02572	-0.02558	-0.02564	-0.02546	-0.02612	-0.02615	2457.09897	-1.0725E-6	-9.658E-7	-6.144E-7	-5.19E-7	-6.148E-7	-4.137E-7	-3.93E-7	-6.709E-7	-5.687E-7	5.92E-8	-5.622E-7	-5.601E-7		2107.04916	-9.5E-5	-8.5E-5	1.1E-4	2036.64801	0.00106	0.0038
498	0.0229	0.0249	-0.5668	-6.56295	-5.98186		1193.83	0.10712	0.13105	3803.29605	1390	3803.29605	-11771		3803.29605	-0.02574	-0.02564	-0.02563	-0.02552	-0.02559	-0.02544	-0.02565	-0.02551	-0.02556	-0.02538	-0.02606	-0.02607	2456.13465	-1.1606E-6	-9.667E-7	-4.193E-7	-5.141E-7	-4.963E-7	-3.765E-7	-4.52E-8	-2.761E-7	-3.792E-7	2.298E-7	-7.183E-7	-4.962E-7		2106.08483	-1.12E-4	-1.26E-4	1.16E-4	2035.68369	0.00122	0.0043
497	0.0223	0.0245	-0.56924	-6.61813	-5.95009		1194.8	0.1067	0.13036	3802.33173	-2003	3802.33173	-4424		3802.33173	-0.02566	-0.02555	-0.02555	-0.02544	-0.0255	-0.02536	-0.02556	-0.02541	-0.02547	-0.02528	-0.02596	-0.02596	2455.17032	-1.189E-6	-8.043E-7	-3.455E-7	-5.031E-7	-5.497E-7	-3.011E-7	-1.991E-7	2.6E-8	-4.893E-7	2.248E-7	-9.772E-7	-5.557E-7		2105.12051	-1.08E-4	-1.73E-4	1.17E-4	2034.71937	0.00141	0.00491
496	0.021	0.0237	-0.57168	-6.57131	-5.9873		1195.76	0.10636	0.12976	3801.3674	-4004	3801.3674	2294		3801.3674	-0.02559	-0.02547	-0.02548	-0.02538	-0.02543	-0.0253	-0.02549	-0.02534	-0.02539	-0.02521	-0.02588	-0.02589	2454.206	-1.1193E-6	-5.117E-7	-3.588E-7	-4.35E-7	-5.308E-7	-2.455E-7	-5.643E-7	1.464E-7	-6.146E-7	5.21E-8	-1.1341E-6	-5.09E-7		2104.15618	-9.7E-5	-1.74E-4	1.09E-4	2033.75505	0.00153	0.00528
495	0.0217	0.0238	-0.57412	-6.53327	-5.9317		1196.73	0.10605	0.12925	3800.40308	-3732	3800.40308	3399		3800.40308	-0.02557	-0.02545	-0.02547	-0.02537	-0.02541	-0.02528	-0.02547	-0.02534	-0.02538	-0.0252	-0.02588	-0.02589	2453.24167	-8.64E-7	-4.33E-8	-4.783E-7	-2.432E-7	-4.326E-7	-2.69E-7	-7.944E-7	1.633E-7	-6.109E-7	-2.129E-7	-1.0838E-6	-3.083E-7		2103.19186	-9.3E-5	-1.34E-4	1.04E-4	2032.79073	0.00149	0.0051
494	0.0238	0.0256	-0.57657	-6.6035	-5.91289		1197.69	0.10577	0.1288	3799.43875	-1520	3799.43875	4265		3799.43875	-0.02557	-0.02545	-0.02547	-0.02536	-0.02541	-0.02527	-0.02548	-0.02536	-0.02539	-0.02521	-0.02589	-0.02591	2452.27735	-4.027E-7	3.488E-7	-7.147E-7	1.13E-7	-3.567E-7	-3.272E-7	-7.671E-7	1.219E-7	-4.944E-7	-4.333E-7	-8.507E-7	-9.38E-8		2102.22753	-8.8E-5	-9.5E-5	9.5E-5	2031.82641	0.00127	0.00435
493	0.0233	0.0257	-0.57901	-6.60476	-6.05628		1198.66	0.10552	0.12842	3798.47443	2665	3798.47443	7358		3798.47443	-0.02553	-0.02543	-0.02545	-0.02532	-0.02537	-0.02525	-0.02545	-0.02534	-0.02537	-0.0252	-0.02587	-0.02588	2451.31302	6.55E-8	3.615E-7	-8.62E-7	3.98E-7	-2.159E-7	-3.313E-7	-5.072E-7	-7.2E-9	-2.644E-7	-4.799E-7	-4.74E-7	5.47E-8		2101.26321	-7.8E-5	-8.2E-5	7.3E-5	2030.8621	9.31E-4	0.00331
492	0.0233	0.0261	-0.58145	-6.69129	-6.09181		1199.62	0.1053	0.12808	3797.5101	8807	3797.5101	10484		3797.5101	-0.02548	-0.02538	-0.0254	-0.02527	-0.02532	-0.0252	-0.0254	-0.02528	-0.02533	-0.02516	-0.02581	-0.02583	2450.3487	3.496E-7	1.357E-7	-7.199E-7	3.338E-7	3.28E-8	-2.789E-7	-1.242E-7	-1.663E-7	-1.83E-8	-3.984E-7	-6.58E-8	1.711E-7		2100.29888	-7.8E-5	-9.4E-5	6.3E-5	2029.89778	6.09E-4	0.00228
491	0.024	0.0273	-0.58389	-6.62106	-6.02283		1200.58	0.10508	0.12775	3796.54578	14605	3796.54578	10823		3796.54578	-0.02543	-0.02533	-0.02535	-0.02522	-0.02528	-0.02515	-0.02535	-0.02522	-0.02528	-0.0251	-0.02575	-0.02578	2449.38437	4.949E-7	-7.51E-8	-3.95E-7	8.05E-8	1.815E-7	-1.814E-7	2.061E-7	-2.226E-7	1.116E-7	-3.23E-7	2.205E-7	2.332E-7		2099.33456	-9.7E-5	-1.25E-4	7.3E-5	2028.93346	3.76E-4	0.00147
490	0.0225	0.0281	-0.58633	-6.68962	-6.09557		1201.55	0.10487	0.12742	3795.58146	18240	3795.58145	5236		3795.58146	-0.02538	-0.02528	-0.0253	-0.02518	-0.02525	-0.0251	-0.02531	-0.02517	-0.02523	-0.02505	-0.02571	-0.02573	2448.42005	4.688E-7	-2.818E-7	-7.79E-8	-3.94E-8	1.47E-7	-6.73E-8	3.436E-7	-1.651E-7	2.9E-9	-2.575E-7	4.165E-7	1.45E-7		2098.37024	-1.21E-4	-1.61E-4	7E-5	2027.96914	2.25E-4	9.19456E-4
489	0.0246	0.0266	-0.58877	-6.64029	-6.07467		1202.51	0.10467	0.12709	3794.61713	20598	3794.61713	-3010		3794.61713	-0.02535	-0.02523	-0.02525	-0.02514	-0.0252	-0.02506	-0.02528	-0.02513	-0.0252	-0.02501	-0.02568	-0.02569	2447.45572	1.528E-7	-4.524E-7	1.787E-7	-2.96E-8	1.087E-7	2.13E-8	4.019E-7	-6.36E-8	-2.948E-7	-1.296E-7	5.828E-7	1.72E-8		2097.40591	-1.29E-4	-1.86E-4	5.5E-5	2027.00482	1.17E-4	5.75458E-4
488	0.0245	0.0265	-0.59121	-6.71554	-6.11898		1203.48	0.10446	0.12677	3793.65281	21641	3793.65281	-6298		3793.65281	-0.02531	-0.02518	-0.02521	-0.0251	-0.02516	-0.02502	-0.02524	-0.02509	-0.02517	-0.02496	-0.02564	-0.02566	2446.4914	-2.888E-7	-4.791E-7	3.119E-7	-9.22E-8	1.071E-7	8.96E-8	4.885E-7	4.23E-8	-4.54E-7	1.6E-8	5.717E-7	1.81E-8		2096.44159	-1.05E-4	-1.86E-4	5.8E-5	2026.04051	3.1E-5	3.45378E-4
487	0.0237	0.0285	-0.59366	-6.69715	-6.03705		1204.44	0.10424	0.12646	3792.68848	18941	3792.68848	-751		3792.68848	-0.02526	-0.02514	-0.02518	-0.02506	-0.02512	-0.02497	-0.02519	-0.02505	-0.02514	-0.02492	-0.0256	-0.02563	2445.52708	-5.381E-7	-3.945E-7	3.197E-7	-3.096E-7	4.21E-8	4.04E-8	3.811E-7	1.64E-7	-3.077E-7	6.45E-8	3.963E-7	5.59E-8		2095.47726	-6.8E-5	-1.55E-4	7.8E-5	2025.07619	-4.4E-5	1.50694E-4
486	0.0237	0.0293	-0.5961	-6.69965	-6.10561		1205.41	0.10402	0.12619	3791.72416	11134	3791.72416	12201		3791.72416	-0.02521	-0.02508	-0.02513	-0.025	-0.02507	-0.02493	-0.02514	-0.025	-0.02509	-0.02488	-0.02555	-0.02558	2444.56275	-5.315E-7	-2.864E-7	2.782E-7	-5.762E-7	-7.3E-8	-1.958E-7	-6.63E-8	3.192E-7	-1.061E-7	-3.68E-8	2.334E-7	1.8E-8		2094.51294	-5.7E-5	-1.1E-4	8.7E-5	2024.11187	-1.07E-4	-4.05345E-5
485	0.0249	0.0289	-0.59854	-6.68711	-6.15326		1206.37	0.10382	0.12592	3790.75983	1958	3790.75983	23171		3790.75983	-0.02516	-0.02502	-0.02507	-0.02493	-0.02502	-0.02487	-0.02508	-0.02494	-0.02503	-0.02481	-0.02549	-0.02551	2443.59843	-4.287E-7	-1.819E-7	2.197E-7	-6.609E-7	-1.468E-7	-3.993E-7	-5.553E-7	4.41E-7	-1.9E-8	-2.292E-7	6.32E-8	-4.25E-8		2093.54861	-7.4E-5	-9.5E-5	8.8E-5	2023.14755	-1.47E-4	-1.92743E-4
484	0.0261	0.0293	-0.60098	-6.8096	-6.14407		1207.33	0.1036	0.12565	3789.79551	-2903	3789.79551	22811		3789.79551	-0.02512	-0.02496	-0.02501	-0.02487	-0.02498	-0.02483	-0.02503	-0.02489	-0.02497	-0.02476	-0.02544	-0.02546	2442.6341	-3.208E-7	-4.6E-9	1.436E-7	-4.585E-7	-1.71E-7	-3.655E-7	-6.799E-7	4.616E-7	1.027E-7	-3.032E-7	-1.221E-7	-6.87E-8		2092.58429	-9.9E-5	-1.16E-4	9.2E-5	2022.18323	-1.7E-4	-2.87596E-4
483	0.0261	0.0293	-0.60342	-6.76236	-6.19841		1208.3	0.10341	0.12543	3788.83118	-2703	3788.83118	15365		3788.83118	-0.02506	-0.02491	-0.02495	-0.02483	-0.02494	-0.02479	-0.02498	-0.02483	-0.02492	-0.02472	-0.02539	-0.0254	2441.66978	-1.545E-7	2.432E-7	-5.3E-8	-1.337E-7	-1.555E-7	-1.272E-7	-4.854E-7	4.177E-7	3.133E-7	-5.03E-8	-1.526E-7	-9.21E-8		2091.61996	-1.36E-4	-1.39E-4	8.9E-5	2021.21891	-1.95E-4	-3.6125E-4
482	0.027	0.0294	-0.60586	-6.85935	-6.2143		1209.26	0.10323	0.12525	3787.86686	-643	3787.86686	9555		3787.86686	-0.02499	-0.02486	-0.02491	-0.02479	-0.02487	-0.02473	-0.02493	-0.02478	-0.02486	-0.02467	-0.02534	-0.02533	2440.70545	1.069E-7	4.355E-7	-3.356E-7	1.686E-7	4.85E-8	2.511E-7	-2.513E-7	3.849E-7	5.021E-7	4.637E-7	3.96E-8	-1.373E-7		2090.65564	-1.74E-4	-1.49E-4	8.6E-5	2020.2546	-2.14E-4	-4.32487E-4
481	0.0286	0.0299	-0.6083	-6.82131	-6.26446		1210.23	0.10304	0.1251	3786.90253	1397	3786.90253	6538		3786.90253	-0.02493	-0.02482	-0.02485	-0.02474	-0.0248	-0.02466	-0.02485	-0.02472	-0.02479	-0.0246	-0.02528	-0.02527	2439.74113	3.812E-7	6.041E-7	-3.808E-7	4.695E-7	4.582E-7	6.996E-7	1.3E-8	3.845E-7	6.215E-7	9.477E-7	2.941E-7	-1.055E-7		2089.69131	-1.83E-4	-1.62E-4	8.5E-5	2019.29028	-2.22E-4	-4.84712E-4
480	0.0287	0.031	-0.61075	-6.88778	-6.22809		1211.19	0.10286	0.12498	3785.93821	3563	3785.93821	4325		3785.93821	-0.02487	-0.02477	-0.0248	-0.02466	-0.02473	-0.02459	-0.02479	-0.02466	-0.02472	-0.02452	-0.02521	-0.0252	2438.7768	5.777E-7	7.479E-7	-9.4E-8	7.382E-7	7.776E-7	1.0179E-6	3.123E-7	3.371E-7	7.089E-7	1.1314E-6	4.571E-7	1.624E-7		2088.72699	-1.78E-4	-1.74E-4	7.7E-5	2018.32596	-2.33E-4	-4.98854E-4
479	0.0294	0.0314	-0.61319	-6.8836	-6.21263		1212.16	0.1027	0.1249	3784.97389	6559	3784.97388	1667		3784.97389	-0.0248	-0.0247	-0.02473	-0.02459	-0.02467	-0.02453	-0.02473	-0.0246	-0.02466	-0.02444	-0.02514	-0.02514	2437.81248	7.513E-7	6.77E-7	3.333E-7	9.321E-7	8.874E-7	1.0658E-6	5.645E-7	1.81E-7	7.914E-7	9.912E-7	6.246E-7	6.454E-7		2087.76267	-1.76E-4	-1.66E-4	6.9E-5	2017.36164	-2.46E-4	-4.60204E-4
478	0.0298	0.0312	-0.61563	-6.95174	-6.23855		1213.12	0.10256	0.12484	3784.00956	10415	3784.00956	-1921		3784.00956	-0.02475	-0.02463	-0.02468	-0.02454	-0.02463	-0.02449	-0.02469	-0.02454	-0.02462	-0.02439	-0.02508	-0.0251	2436.84815	8.678E-7	4.295E-7	7.582E-7	1.1407E-6	9.088E-7	9.691E-7	7.652E-7	2.35E-8	7.015E-7	7.789E-7	8.402E-7	1.0438E-6		2086.79834	-1.56E-4	-1.19E-4	7.8E-5	2016.39732	-2.63E-4	-3.27454E-4
477	0.0304	0.0317	-0.61807	-6.89697	-6.23269		1214.08	0.10242	0.1248	3783.04524	13727	3783.04524	-4321		3783.04524	-0.02472	-0.0246	-0.02465	-0.02451	-0.02459	-0.02446	-0.02466	-0.02451	-0.0246	-0.02436	-0.02506	-0.02507	2435.88383	7.066E-7	2.168E-7	1.0173E-6	1.2985E-6	8.282E-7	8.809E-7	8.795E-7	-2.36E-8	3.719E-7	6.261E-7	8.549E-7	1.147E-6		2085.83402	-9E-5	-2.5E-5	9.7E-5	2015.433	-2.9E-4	-7.10544E-5
476	0.031	0.0328	-0.62051	-6.91829	-6.24482		1215.05	0.10231	0.12483	3782.08091	15056	3782.08091	-1454		3782.08091	-0.02467	-0.02456	-0.0246	-0.02447	-0.02455	-0.02441	-0.02462	-0.02447	-0.02456	-0.02434	-0.02503	-0.02503	2434.91951	3.311E-7	7.86E-8	1.0162E-6	1.1361E-6	6.368E-7	7.242E-7	8.837E-7	2.64E-8	1.478E-7	4.348E-7	6.271E-7	1.0696E-6		2084.86969	3.9E-5	1.27E-4	1.06E-4	2014.46869	-3.22E-4	2.28587E-4
475	0.0305	0.0333	-0.62295	-6.98434	-6.34807		1216.01	0.10221	0.12489	3781.11659	14663	3781.11659	7748		3781.11659	-0.02459	-0.02449	-0.02452	-0.02439	-0.02448	-0.02433	-0.02454	-0.0244	-0.02449	-0.02428	-0.02496	-0.02496	2433.95518	3.92E-8	-2.01E-8	8.553E-7	5.954E-7	4.435E-7	3.131E-7	7.839E-7	1.627E-7	1.326E-7	2.43E-7	4.502E-7	9.086E-7		2083.90537	2.18E-4	3.39E-4	9.7E-5	2013.50437	-3.42E-4	4.32619E-4
474	0.0314	0.0337	-0.62539	-7.02072	-6.32466		1216.98	0.1021	0.12498	3780.15226	14985	3780.15226	16729		3780.15226	-0.0245	-0.02441	-0.02443	-0.02431	-0.0244	-0.02425	-0.02445	-0.02432	-0.02439	-0.02419	-0.02487	-0.02487	2432.99086	-1.297E-7	-8.11E-8	6.377E-7	9.3E-9	2.412E-7	-1.859E-7	5.786E-7	3.924E-7	-2.4E-8	2.418E-7	3.682E-7	6.267E-7		2082.94104	3.64E-4	5.15E-4	7.9E-5	2012.54005	-3.48E-4	4.57638E-4
473	0.0321	0.0338	-0.62784	-7.03158	-6.402		1217.94	0.10201	0.1251	3779.18794	17224	3779.18794	17792		3779.18794	-0.02444	-0.02435	-0.02437	-0.02425	-0.02433	-0.0242	-0.02438	-0.02426	-0.02432	-0.02412	-0.0248	-0.02482	2432.02653	-2.545E-7	-7.94E-8	3.539E-7	-2.885E-7	-8.63E-8	-3.475E-7	3.464E-7	6.135E-7	-3.297E-7	4.456E-7	1.481E-7	2.213E-7		2081.97672	3.82E-4	5.19E-4	5.7E-5	2011.57573	-3.46E-4	3.06416E-4
472	0.0327	0.0348	-0.63028	-7.06545	-6.34306		1218.91	0.10197	0.12528	3778.22361	19568	3778.22361	14820		3778.22361	-0.02441	-0.0243	-0.02433	-0.02422	-0.02428	-0.02416	-0.02435	-0.02422	-0.02428	-0.02408	-0.02476	-0.02479	2431.06221	-2.13E-7	6.37E-8	6.9E-9	-3.254E-7	-4.215E-7	-1.562E-7	2.009E-7	6.82E-7	-3.554E-7	6.451E-7	-1.726E-7	-1.635E-7		2081.01239	2.79E-4	3.69E-4	4.5E-5	2010.61141	-3.35E-4	7.05771E-5
471	0.0333	0.0366	-0.63272	-7.0458	-6.38277		1219.87	0.10193	0.12549	3777.25929	20135	3777.25929	16868		3777.25929	-0.02438	-0.02426	-0.02428	-0.02418	-0.02423	-0.02411	-0.02432	-0.02418	-0.02424	-0.02404	-0.02472	-0.02475	2430.09788	5.49E-8	3.273E-7	-3.204E-7	-3.077E-7	-4.47E-7	6.43E-8	1.539E-7	5.496E-7	1.98E-8	6.132E-7	-3.155E-7	-3.349E-7		2080.04807	1.22E-4	1.9E-4	5.6E-5	2009.64709	-3.11E-4	-1.43409E-4
470	0.0335	0.0362	-0.63516	-7.13442	-6.3811		1220.83	0.10191	0.12574	3776.29496	17873	3776.29496	21776		3776.29496	-0.02433	-0.0242	-0.02421	-0.02412	-0.02417	-0.02406	-0.02426	-0.02413	-0.02419	-0.02398	-0.02467	-0.02468	2429.13356	3.871E-7	5.813E-7	-4.698E-7	-2.777E-7	-1.912E-7	2.074E-7	1.436E-7	3.492E-7	5.348E-7	2.936E-7	-2.297E-7	-2.524E-7		2079.08374	-2.4E-5	5.5E-5	8.2E-5	2008.68278	-2.86E-4	-2.88265E-4
469	0.0336	0.0376	-0.6376	-7.11854	-6.40577		1221.8	0.10192	0.12603	3775.33064	14078	3775.33064	21556		3775.33064	-0.02426	-0.02413	-0.02415	-0.02405	-0.02412	-0.02399	-0.0242	-0.02406	-0.02412	-0.02391	-0.0246	-0.02461	2428.16923	5.838E-7	7.35E-7	-3.467E-7	-1.793E-7	-5.06E-8	2.974E-7	8.52E-8	2.197E-7	1.0087E-6	-1.386E-7	-1.446E-7	-1.76E-8		2078.11942	-1.15E-4	-3.1E-5	1.03E-4	2007.71846	-2.79E-4	-3.51588E-4
468	0.0348	0.0376	-0.64004	-7.23141	-6.45384		1222.76	0.10191	0.12633	3774.36632	10882	3774.36631	15653		3774.36632	-0.02418	-0.02406	-0.0241	-0.02399	-0.02405	-0.02391	-0.02412	-0.02398	-0.02406	-0.02384	-0.02452	-0.02455	2427.20491	5.752E-7	7.137E-7	-4.2E-8	-4.63E-8	-9.69E-8	3.036E-7	-2.7E-9	1.083E-7	1.3627E-6	-4.412E-7	-1.325E-7	2.46E-7		2077.1551	-1.55E-4	-9.7E-5	9.9E-5	2006.75414	-2.86E-4	-3.70927E-4
467	0.036	0.038	-0.64248	-7.32547	-6.52031		1223.73	0.10191	0.12662	3773.40199	8298	3773.40199	9582		3773.40199	-0.02409	-0.02399	-0.02403	-0.02393	-0.02398	-0.02383	-0.02405	-0.02389	-0.02399	-0.02377	-0.02445	-0.02449	2426.24058	4.292E-7	5.45E-7	2.76E-7	1.44E-7	-8.51E-8	3.111E-7	5.08E-8	1.21E-8	1.4564E-6	-4.743E-7	1.4E-9	3.646E-7		2076.19077	-1.63E-4	-1.72E-4	8.7E-5	2005.78982	-3E-4	-4.16402E-4
466	0.0368	0.0391	-0.64493	-7.41075	-6.578		1224.69	0.10191	0.12692	3772.43767	7419	3772.43767	5265		3772.43767	-0.024	-0.02391	-0.02395	-0.02386	-0.02391	-0.02375	-0.02397	-0.02381	-0.02391	-0.0237	-0.02438	-0.02441	2425.27626	1.829E-7	4.375E-7	4.327E-7	5.089E-7	8.8E-9	4.696E-7	2.675E-7	8.46E-8	1.1936E-6	-2.511E-7	2.819E-7	2.619E-7		2075.22645	-1.35E-4	-2.23E-4	1E-4	2004.8255	-3.1E-4	-4.98682E-4
465	0.0371	0.0389	-0.64737	-7.30373	-6.54916		1225.66	0.10189	0.1272	3771.47334	10218	3771.47334	39		3771.47334	-0.02393	-0.02383	-0.02386	-0.02378	-0.02384	-0.02369	-0.0239	-0.02375	-0.02382	-0.02363	-0.0243	-0.02433	2424.31194	-1.132E-7	5.175E-7	4.03E-7	9.064E-7	1.663E-7	7.872E-7	4.621E-7	3.5E-7	6.772E-7	4.2E-8	5.314E-7	1.615E-7		2074.26212	-7.4E-5	-1.82E-4	1.23E-4	2003.86118	-3.06E-4	-5.94405E-4
464	0.0382	0.0405	-0.64981	-7.40574	-6.55166		1226.62	0.10185	0.12742	3770.50902	14605	3770.50902	-5113		3770.50902	-0.02387	-0.02375	-0.02378	-0.0237	-0.02376	-0.02362	-0.02383	-0.02369	-0.02373	-0.02358	-0.02423	-0.02426	2423.34761	-1.759E-7	6.088E-7	3.981E-7	9.755E-7	5.026E-7	1.0407E-6	5.961E-7	5.935E-7	1.676E-7	2.545E-7	7.644E-7	2.727E-7		2073.2978	2.2E-5	-1.6E-5	1.14E-4	2002.89687	-2.88E-4	-6.96702E-4
463	0.038	0.0406	-0.65225	-7.46008	-6.61688		1227.59	0.1018	0.12758	3769.54469	16006	3769.54469	-4507		3769.54469	-0.02382	-0.0237	-0.02373	-0.02363	-0.0237	-0.02357	-0.02378	-0.02365	-0.02368	-0.02352	-0.02417	-0.0242	2422.38329	1.939E-7	5.772E-7	5.458E-7	7.407E-7	9.237E-7	9.439E-7	7.407E-7	6.032E-7	-1.767E-7	4.974E-7	1.0859E-6	5.066E-7		2072.33347	1.85E-4	2.5E-4	7.9E-5	2001.93255	-2.73E-4	-7.81615E-4
462	0.0392	0.0407	-0.65469	-7.50064	-6.5964		1228.55	0.1017	0.12769	3768.58037	13437	3768.58037	2138		3768.58037	-0.02376	-0.02365	-0.02367	-0.02358	-0.02364	-0.0235	-0.02371	-0.0236	-0.02364	-0.02346	-0.02411	-0.02415	2421.41896	6.614E-7	5.574E-7	6.99E-7	6.117E-7	1.1419E-6	6.196E-7	8.49E-7	4.777E-7	-3.943E-7	8.912E-7	1.3279E-6	6.604E-7		2071.36915	3.96E-4	5.37E-4	6E-5	2000.96823	-2.64E-4	-8.19215E-4
461	0.0405	0.0418	-0.65713	-7.60013	-6.64113		1229.51	0.10154	0.1277	3767.61604	10598	3767.61604	9586		3767.61604	-0.02368	-0.02359	-0.02361	-0.02351	-0.02357	-0.02342	-0.02364	-0.02352	-0.02357	-0.02338	-0.02402	-0.02407	2420.45464	8.738E-7	5.828E-7	7.078E-7	7.247E-7	1.0954E-6	4.241E-7	8.92E-7	4.643E-7	-3.942E-7	1.2487E-6	1.2521E-6	6.745E-7		2070.40482	5.27E-4	6.91E-4	7.5E-5	2000.00391	-2.63E-4	-8.05505E-4
460	0.0412	0.0431	-0.65957	-7.7059	-6.68502		1230.48	0.10135	0.12762	3766.65172	11157	3766.65172	16705		3766.65172	-0.0236	-0.02353	-0.02353	-0.02342	-0.02349	-0.02334	-0.02357	-0.02343	-0.02348	-0.0233	-0.02394	-0.02399	2419.49031	9.456E-7	4.921E-7	7.222E-7	7.882E-7	9.976E-7	3.059E-7	9.046E-7	4.756E-7	-5.19E-8	1.2191E-6	9.983E-7	6.962E-7		2069.4405	4.71E-4	5.97E-4	1.07E-4	1999.03959	-2.68E-4	-7.67681E-4
459	0.0417	0.0428	-0.66202	-7.75899	-6.73435		1231.44	0.10112	0.12747	3765.68739	14928	3765.68739	22145		3765.68739	-0.02352	-0.02346	-0.02345	-0.02334	-0.02342	-0.02327	-0.0235	-0.02335	-0.0234	-0.02323	-0.02388	-0.02391	2418.52599	9.41E-7	3.479E-7	8.935E-7	6.245E-7	9.246E-7	1.063E-7	8.325E-7	3.702E-7	3.547E-7	8.417E-7	8.311E-7	7.474E-7		2068.47617	2.74E-4	3.2E-4	1.31E-4	1998.07528	-2.72E-4	-7.52084E-4
458	0.0433	0.0437	-0.66446	-7.74227	-6.80249		1232.41	0.10082	0.12722	3764.72307	17983	3764.72307	21253		3764.72307	-0.02345	-0.02338	-0.02338	-0.02328	-0.02336	-0.02322	-0.02344	-0.02328	-0.02334	-0.02316	-0.02383	-0.02385	2417.56166	7.044E-7	3.967E-7	9.798E-7	4.381E-7	7.009E-7	2.71E-8	5.136E-7	3.874E-7	4.998E-7	5.842E-7	6.34E-7	5.971E-7		2067.51185	4.5E-5	9E-6	1.33E-4	1997.11096	-2.7E-4	-7.75087E-4
457	0.0431	0.0448	-0.6669	-7.73014	-6.91286		1233.37	0.10049	0.1269	3763.75875	17417	3763.75874	15447		3763.75875	-0.02338	-0.0233	-0.02331	-0.02321	-0.02331	-0.02316	-0.02338	-0.02322	-0.02329	-0.0231	-0.02377	-0.02379	2416.59734	3.311E-7	6.181E-7	8.051E-7	4.325E-7	3.804E-7	1.999E-7	3.71E-8	6.494E-7	5.291E-7	6.361E-7	2.919E-7	2.578E-7		2066.54753	-1.46E-4	-2.24E-4	1.15E-4	1996.14664	-2.69E-4	-8.04752E-4
456	0.0434	0.0454	-0.66934	-7.90029	-6.97724		1234.34	0.10014	0.12654	3762.79442	14893	3762.79442	9593		3762.79442	-0.02332	-0.02323	-0.02324	-0.02314	-0.02325	-0.02308	-0.0233	-0.02316	-0.02322	-0.02303	-0.02369	-0.02372	2415.63301	1.498E-7	7.414E-7	5.636E-7	5.764E-7	2.711E-7	4.665E-7	-1.838E-7	9.586E-7	6.586E-7	7.913E-7	1.024E-7	5.01E-8		2065.5832	-2.71E-4	-3.48E-4	9.6E-5	1995.18232	-2.76E-4	-7.86477E-4
455	0.0444	0.0456	-0.67178	-7.90865	-6.91369		1235.3	0.09978	0.12617	3761.8301	12086	3761.8301	5470		3761.8301	-0.02325	-0.02314	-0.02317	-0.02307	-0.02317	-0.023	-0.02322	-0.02308	-0.02315	-0.02295	-0.02361	-0.02365	2414.66869	2.01E-7	6.352E-7	4.073E-7	7.78E-7	3.51E-7	7.478E-7	-3.36E-8	1.1696E-6	7.576E-7	8.682E-7	2.697E-7	1.21E-7		2064.61888	-3.23E-4	-4.07E-4	9.7E-5	1994.218	-2.84E-4	-6.98576E-4
454	0.0459	0.046	-0.67422	-7.9793	-7.04538		1236.26	0.0994	0.1258	3760.86577	8892	3760.86577	3388		3760.86577	-0.02316	-0.02304	-0.02308	-0.02298	-0.02306	-0.02291	-0.02312	-0.02299	-0.02307	-0.02285	-0.02352	-0.02354	2413.70437	3.137E-7	4.266E-7	3.865E-7	9.278E-7	4.514E-7	9.904E-7	2.35E-7	1.1777E-6	7.179E-7	7.769E-7	5.708E-7	4.793E-7		2063.65455	-3.08E-4	-4.55E-4	1.14E-4	1993.25368	-2.89E-4	-5.82325E-4
453	0.047	0.047	-0.67666	-8.07127	-6.95675		1237.23	0.09905	0.12548	3759.90145	7882	3759.90145	5266		3759.90145	-0.02307	-0.02295	-0.023	-0.02289	-0.02295	-0.02281	-0.02303	-0.02291	-0.02298	-0.02277	-0.02344	-0.02344	2412.74004	5.091E-7	2.813E-7	5.472E-7	8.684E-7	6.173E-7	1.0278E-6	4.356E-7	9.619E-7	6.561E-7	5.629E-7	7.084E-7	1.0396E-6		2062.69023	-2.61E-4	-4.94E-4	1.23E-4	1992.28937	-2.92E-4	-4.96343E-4
452	0.0479	0.0481	-0.6791	-8.11517	-7.09387		1238.19	0.09873	0.12521	3758.93712	11366	3758.93712	14594		3758.93712	-0.023	-0.02288	-0.02293	-0.02282	-0.02287	-0.02274	-0.02296	-0.02284	-0.0229	-0.02271	-0.02338	-0.02338	2411.77572	8.09E-7	1.981E-7	7.228E-7	5.927E-7	7.051E-7	8.541E-7	5.365E-7	6.784E-7	6.72E-7	4.451E-7	6.229E-7	1.4081E-6		2061.7259	-2.15E-4	-4.8E-4	1.16E-4	1991.32505	-2.83E-4	-4.39538E-4
451	0.0479	0.0481	-0.68155	-8.10095	-7.10349		1239.16	0.09843	0.12498	3757.9728	17727	3757.9728	28694		3757.9728	-0.02294	-0.02282	-0.02288	-0.02275	-0.02282	-0.02268	-0.0229	-0.02277	-0.02283	-0.02265	-0.02331	-0.02333	2410.81139	1.0627E-6	1.826E-7	7.081E-7	3.666E-7	5.025E-7	6.109E-7	5.902E-7	4.412E-7	7.93E-7	5.467E-7	4.853E-7	1.3739E-6		2060.76158	-1.71E-4	-3.88E-4	9.9E-5	1990.36073	-2.63E-4	-3.45653E-4
450	0.0486	0.0482	-0.68399	-8.25647	-7.20967		1240.12	0.09818	0.12481	3757.00847	24970	3757.00847	38025		3757.00847	-0.02286	-0.02274	-0.0228	-0.02268	-0.02276	-0.0226	-0.02282	-0.02268	-0.02275	-0.02256	-0.02323	-0.02325	2409.84707	1.1232E-6	3.234E-7	5.641E-7	4.006E-7	2.554E-7	4.64E-7	6.636E-7	3.509E-7	9.745E-7	7.592E-7	4.38E-7	1.2182E-6		2059.79725	-1.33E-4	-2.8E-4	7.7E-5	1989.39641	-2.44E-4	-1.82174E-4
449	0.0498	0.0488	-0.68643	-8.40697	-7.24437		1241.09	0.09799	0.12469	3756.04415	31394	3756.04415	38629		3756.04415	-0.02277	-0.02266	-0.02271	-0.02259	-0.02267	-0.02252	-0.02274	-0.02259	-0.02266	-0.02247	-0.02314	-0.02317	2408.88274	1.0291E-6	5.507E-7	4.103E-7	6.234E-7	2.622E-7	5.444E-7	7.729E-7	4.92E-7	1.1204E-6	9.267E-7	4.519E-7	1.1583E-6		2058.83293	-1.32E-4	-2.19E-4	5.9E-5	1988.43209	-2.38E-4	2.07817E-5
448	0.051	0.05	-0.68887	-8.51984	-7.37857		1242.05	0.09782	0.12459	3755.07982	33732	3755.07982	32583		3755.07982	-0.02267	-0.02259	-0.02262	-0.0225	-0.02257	-0.02244	-0.02266	-0.02251	-0.02257	-0.02238	-0.02305	-0.02309	2407.91842	8.852E-7	7.593E-7	3.165E-7	8.244E-7	4.281E-7	7.643E-7	8.63E-7	7.021E-7	1.1337E-6	9.636E-7	5.638E-7	1.1929E-6		2057.8686	-1.6E-4	-2.08E-4	6.1E-5	1987.46777	-2.32E-4	2.399E-4
447	0.0513	0.0518	-0.69131	-8.57419	-7.42748		1243.01	0.09765	0.12447	3754.1155	31515	3754.1155	20763		3754.1155	-0.02257	-0.02249	-0.0225	-0.02237	-0.02246	-0.02233	-0.02254	-0.0224	-0.02244	-0.02227	-0.02294	-0.02297	2406.95409	7.485E-7	9.889E-7	3.591E-7	8.678E-7	6.714E-7	9.425E-7	9.258E-7	8.198E-7	1.0034E-6	9.038E-7	8.415E-7	1.2662E-6		2056.90428	-1.95E-4	-2.47E-4	7.1E-5	1986.50346	-2.04E-4	4.6644E-4
446	0.0526	0.0522	-0.69375	-8.67034	-7.50314		1243.98	0.09747	0.1243	3753.15117	29840	3753.15117	5646		3753.15117	-0.02245	-0.02235	-0.02235	-0.02224	-0.02233	-0.02219	-0.0224	-0.02226	-0.0223	-0.02213	-0.02278	-0.02281	2405.98977	7.357E-7	1.2895E-6	5.225E-7	8.553E-7	1.0683E-6	1.1245E-6	9.87E-7	9.993E-7	8.921E-7	9.366E-7	1.1375E-6	1.21E-6		2055.93996	-2.51E-4	-3.3E-4	6.6E-5	1985.53914	-1.33E-4	6.99794E-4
445	0.0531	0.0525	-0.69619	-8.76231	-7.61267		1244.94	0.09728	0.12409	3752.18685	31476	3752.18685	-5844		3752.18685	-0.02235	-0.02224	-0.02223	-0.02214	-0.02223	-0.02208	-0.02229	-0.02216	-0.0222	-0.02202	-0.02266	-0.02269	2405.02544	8.363E-7	1.5822E-6	7.184E-7	8.994E-7	1.4361E-6	1.3862E-6	1.0243E-6	1.3541E-6	8.943E-7	1.1152E-6	1.324E-6	9.734E-7		2054.97563	-3.22E-4	-4.04E-4	6E-5	1984.57482	-1.9E-5	9.49741E-4
444	0.0534	0.0531	-0.69864	-8.74977	-7.713		1245.91	0.09709	0.12383	3751.22253	33154	3751.22253	-7740		3751.22253	-0.02228	-0.02217	-0.02216	-0.02208	-0.02216	-0.022	-0.02222	-0.02209	-0.02214	-0.02195	-0.0226	-0.02263	2404.06112	9.25E-7	1.5845E-6	9.447E-7	9.053E-7	1.5357E-6	1.4952E-6	1.1397E-6	1.6194E-6	9.75E-7	1.1516E-6	1.4736E-6	8.11E-7		2054.01131	-3.66E-4	-4.37E-4	7.1E-5	1983.6105	1.08E-4	0.00121
443	0.0549	0.0543	-0.70108	-8.91699	-7.80205		1246.87	0.09691	0.12355	3750.2582	31764	3750.2582	-2028		3750.2582	-0.02219	-0.02208	-0.02207	-0.02201	-0.02207	-0.02191	-0.02212	-0.022	-0.02206	-0.02186	-0.0225	-0.02254	2403.0968	9.866E-7	1.161E-6	1.2796E-6	8.156E-7	1.4664E-6	1.265E-6	1.4206E-6	1.4997E-6	1.0812E-6	8.696E-7	1.5857E-6	8.763E-7		2053.04698	-3.64E-4	-4.49E-4	9.7E-5	1982.64618	2.02E-4	0.00144
442	0.0552	0.0552	-0.70352	-9.0633	-7.89068		1247.84	0.09674	0.12328	3749.29388	26922	3749.29388	3535		3749.29388	-0.0221	-0.02199	-0.02197	-0.02191	-0.02198	-0.02182	-0.02202	-0.0219	-0.02196	-0.02177	-0.0224	-0.02245	2402.13247	9.289E-7	7.024E-7	1.5184E-6	7.299E-7	1.3082E-6	9.067E-7	1.6287E-6	1.1446E-6	1.0358E-6	6.15E-7	1.4434E-6	9.035E-7		2052.08266	-3.29E-4	-4.28E-4	1.21E-4	1981.68186	2.54E-4	0.00158
441	0.0556	0.056	-0.70596	-9.13019	-7.96049		1248.8	0.09657	0.12302	3748.32955	21830	3748.32955	5169		3748.32955	-0.02202	-0.02192	-0.02192	-0.02184	-0.02191	-0.02177	-0.02197	-0.02184	-0.0219	-0.02171	-0.02236	-0.0224	2401.16815	6.125E-7	6.062E-7	1.2886E-6	7.305E-7	9.441E-7	6.702E-7	1.4625E-6	8.93E-7	7.762E-7	6.908E-7	9.412E-7	5.608E-7		2051.11833	-2.73E-4	-3.67E-4	1.33E-4	1980.71755	2.85E-4	0.00158
440	0.0567	0.0563	-0.7084	-9.33922	-8.02863		1249.76	0.09643	0.12279	3747.36523	20623	3747.36523	5557		3747.36523	-0.02194	-0.02183	-0.02186	-0.02175	-0.02184	-0.0217	-0.02192	-0.02177	-0.02184	-0.02165	-0.02231	-0.02234	2400.20382	1.959E-7	7.156E-7	8.064E-7	8.057E-7	5.022E-7	5.618E-7	1.1225E-6	7.212E-7	6.201E-7	8.521E-7	4.317E-7	-6.6E-9		2050.15401	-2.22E-4	-3.1E-4	1.33E-4	1979.75323	2.93E-4	0.00141
439	0.0577	0.0564	-0.71084	-9.36848	-8.18958		1250.73	0.09632	0.12259	3746.4009	22693	3746.4009	7023		3746.4009	-0.02183	-0.02171	-0.02173	-0.02162	-0.02172	-0.02157	-0.02181	-0.02164	-0.02172	-0.02152	-0.02218	-0.0222	2399.2395	2.16E-8	7.261E-7	5.706E-7	9.04E-7	2.848E-7	4.672E-7	9.847E-7	4.257E-7	7.896E-7	8.188E-7	2.867E-7	-2.871E-7		2049.18968	-1.97E-4	-2.77E-4	1.23E-4	1978.78891	2.48E-4	0.00112
438	0.0581	0.0573	-0.71328	-9.44791	-8.31081		1251.69	0.09624	0.12242	3745.43658	25851	3745.43658	8660		3745.43658	-0.02169	-0.02158	-0.02157	-0.02147	-0.02157	-0.02141	-0.02165	-0.02148	-0.02155	-0.02135	-0.02199	-0.02202	2398.27517	1.532E-7	7.058E-7	5.166E-7	1.0175E-6	2.738E-7	4.078E-7	9.087E-7	1.436E-7	1.0176E-6	7.174E-7	3.237E-7	-1.136E-7		2048.22536	-1.87E-4	-2.36E-4	1.05E-4	1977.82459	1.45E-4	7.90387E-4
437	0.0593	0.0576	-0.71573	-9.60677	-8.48221		1252.66	0.09616	0.12227	3744.47225	29811	3744.47225	10929		3744.47225	-0.02157	-0.02149	-0.02145	-0.02135	-0.02145	-0.02129	-0.02153	-0.02136	-0.02143	-0.02124	-0.02186	-0.0219	2397.31085	4.121E-7	7.445E-7	3.69E-7	1.1369E-6	2.414E-7	4.618E-7	6.316E-7	7.69E-8	9.918E-7	7.289E-7	2.685E-7	2.131E-7		2047.26103	-1.78E-4	-1.84E-4	8.9E-5	1976.86027	1.7E-5	4.87423E-4
436	0.0598	0.0577	-0.71817	-9.74054	-8.60763		1253.62	0.09608	0.12213	3743.50793	34651	3743.50793	16590		3743.50793	-0.02151	-0.02144	-0.02141	-0.02131	-0.0214	-0.02125	-0.02149	-0.02134	-0.0214	-0.02121	-0.02184	-0.02188	2396.34652	7.425E-7	6.781E-7	3.082E-7	1.1682E-6	2.823E-7	5.342E-7	3.101E-7	9.77E-8	7.854E-7	7.727E-7	3.084E-7	5.761E-7		2046.29671	-1.76E-4	-1.51E-4	9E-5	1975.89596	-8.4E-5	2.34442E-4
435	0.0601	0.0588	-0.72061	-9.90776	-8.69124		1254.59	0.09597	0.12201	3742.5436	40687	3742.5436	24919		3742.5436	-0.02145	-0.02138	-0.02136	-0.02128	-0.02135	-0.02122	-0.02143	-0.02131	-0.02136	-0.02118	-0.02182	-0.02187	2395.3822	1.137E-6	5.059E-7	5.876E-7	1.075E-6	6.035E-7	5.277E-7	1.535E-7	1.482E-7	6.157E-7	7.463E-7	5.851E-7	9.969E-7		2045.33239	-1.88E-4	-1.65E-4	1.03E-4	1974.93164	-1.3E-4	7.07516E-5
434	0.0608	0.06	-0.72305	-10.075	-8.62017		1255.55	0.09584	0.12189	3741.57928	46692	3741.57928	31831		3741.57928	-0.02135	-0.02127	-0.02127	-0.02119	-0.02127	-0.02114	-0.02134	-0.02123	-0.02126	-0.0211	-0.02174	-0.02179	2394.41787	1.4086E-6	4.856E-7	9.377E-7	9.621E-7	9.892E-7	5.754E-7	1.02E-7	4.268E-7	5.358E-7	7.653E-7	8.519E-7	1.2529E-6		2044.36806	-2.2E-4	-2.24E-4	1.04E-4	1973.96732	-1.39E-4	5.3793E-6
433	0.0626	0.06	-0.72549	-10.1419	-8.92953		1256.51	0.0957	0.12178	3740.61496	50238	3740.61496	38909		3740.61496	-0.02125	-0.02114	-0.02116	-0.02108	-0.02116	-0.02103	-0.02124	-0.02112	-0.02114	-0.02099	-0.02164	-0.0217	2393.45355	1.3772E-6	5.647E-7	9.94E-7	7.642E-7	1.0942E-6	7.234E-7	1.265E-7	8.294E-7	5.07E-7	8.018E-7	9.742E-7	1.3038E-6		2043.40374	-2.59E-4	-3.13E-4	9.9E-5	1973.003	-1.45E-4	7.211E-7
432	0.0627	0.0609	-0.72793	-10.4011	-8.97969		1257.48	0.09555	0.12165	3739.65063	51191	3739.65063	49128		3739.65063	-0.02114	-0.02101	-0.02105	-0.02096	-0.02102	-0.02091	-0.02114	-0.02101	-0.02102	-0.02088	-0.02153	-0.02158	2392.48923	1.2143E-6	4.432E-7	9.228E-7	3.531E-7	1.0254E-6	7.631E-7	3.826E-7	1.0031E-6	5.425E-7	6.472E-7	1.0845E-6	1.4029E-6		2042.43941	-3.06E-4	-4.03E-4	1.1E-4	1972.03868	-1.68E-4	3.19496E-5
431	0.0629	0.0617	-0.73037	-10.493	-9.26397		1258.44	0.09539	0.12152	3738.68631	51893	3738.68631	52827		3738.68631	-0.02101	-0.02089	-0.02093	-0.02083	-0.02088	-0.02078	-0.02101	-0.02088	-0.0209	-0.02075	-0.0214	-0.02144	2391.5249	1.0821E-6	2.905E-7	8.708E-7	-5.96E-8	1.0084E-6	7.181E-7	6.995E-7	9.474E-7	4.994E-7	4.56E-7	1.0781E-6	1.4173E-6		2041.47509	-3.94E-4	-4.9E-4	1.23E-4	1971.07436	-2.12E-4	1.24776E-4
430	0.0634	0.0623	-0.73282	-10.6226	-9.40192		1259.41	0.0952	0.12139	3737.72198	54174	3737.72198	41396		3737.72198	-0.02087	-0.02077	-0.02079	-0.0207	-0.02075	-0.02063	-0.02087	-0.02073	-0.02077	-0.0206	-0.02126	-0.02128	2390.56058	7.925E-7	4.463E-7	6.14E-7	-1.879E-7	9.259E-7	7.939E-7	6.928E-7	8.403E-7	2.455E-7	4.94E-7	7.518E-7	1.0366E-6		2040.51076	-5.1E-4	-5.82E-4	1.17E-4	1970.11005	-2.77E-4	2.62796E-4
429	0.0642	0.0628	-0.73526	-10.8149	-9.44791		1260.37	0.09499	0.12124	3736.75766	56836	3736.75766	25615		3736.75766	-0.02073	-0.02064	-0.02064	-0.02056	-0.02063	-0.0205	-0.02072	-0.0206	-0.02064	-0.02046	-0.02111	-0.02114	2389.59625	3.202E-7	6.549E-7	2.507E-7	-1.314E-7	7.133E-7	7.861E-7	5.242E-7	6.659E-7	1.367E-7	5.682E-7	3.886E-7	5.47E-7		2039.54644	-5.62E-4	-6.36E-4	1.14E-4	1969.14573	-3.81E-4	2.1865E-4
428	0.065	0.0636	-0.7377	-10.9738	-9.5357		1261.34	0.09475	0.12105	3735.79333	57539	3735.79333	18488		3735.79333	-0.02061	-0.02052	-0.02052	-0.02044	-0.02051	-0.02038	-0.02059	-0.02047	-0.02053	-0.02035	-0.021	-0.02103	2388.63193	-2.01E-8	5.39E-7	2.03E-7	-9.51E-8	5.772E-7	5.097E-7	6.301E-7	4.632E-7	4.866E-7	4.74E-7	4.004E-7	3.972E-7		2038.58211	-5.15E-4	-5.92E-4	1.28E-4	1968.18141	-6.03E-4	-4.79406E-4
427	0.0655	0.0635	-0.74014	-11.187	-9.69874		1262.3	0.09446	0.12079	3734.82901	56700	3734.82901	17486		3734.82901	-0.0205	-0.02041	-0.02043	-0.02034	-0.0204	-0.02028	-0.02049	-0.02035	-0.02042	-0.02025	-0.0209	-0.02093	2387.6676	-8.49E-8	3.234E-7	4.476E-7	3.37E-8	4.85E-7	3.067E-7	7.924E-7	4.509E-7	8.78E-7	4.13E-7	5.608E-7	3.471E-7		2037.61779	-4.24E-4	-4.83E-4	1.4E-4	1967.21709	-0.00111	-0.00239
426	0.0664	0.064	-0.74258	-11.279	-9.86596		1263.27	0.09413	0.12047	3733.86468	57155	3733.86468	17242		3733.86468	-0.02037	-0.02029	-0.02032	-0.02022	-0.02028	-0.02018	-0.02038	-0.02023	-0.02031	-0.02013	-0.02078	-0.02082	2386.70328	-1.33E-8	3.737E-7	6.421E-7	3.513E-7	2.477E-7	3.62E-7	5.567E-7	6.461E-7	8.494E-7	4.902E-7	4.47E-7	6E-8		2036.65346	-3.34E-4	-3.77E-4	1.34E-4	1966.25277	-0.00208	-0.00582
425	0.0669	0.0651	-0.74502	-11.3751	-10.0165		1264.23	0.09378	0.12009	3732.90036	60769	3732.90036	22605		3732.90036	-0.02023	-0.02015	-0.02019	-0.02008	-0.02014	-0.02004	-0.02024	-0.02011	-0.02018	-0.01998	-0.02065	-0.02068	2385.73895	1.905E-7	5.488E-7	7.822E-7	6.9E-7	9.69E-8	4.239E-7	2.541E-7	7.907E-7	6.574E-7	5.077E-7	3.005E-7	-1.026E-7		2035.68914	-2.56E-4	-2.83E-4	1.2E-4	1965.28845	-0.0033	-0.00993
424	0.067	0.0662	-0.74746	-11.5967	-10.1879		1265.19	0.0934	0.11962	3731.93603	66103	3731.93603	36574		3731.93603	-0.02011	-0.02003	-0.02006	-0.01996	-0.02003	-0.01991	-0.02012	-0.02	-0.02007	-0.01986	-0.02052	-0.02056	2384.77463	5.253E-7	5.574E-7	9.826E-7	9.345E-7	3.334E-7	4.334E-7	3.654E-7	7.942E-7	6.697E-7	4.091E-7	4.72E-7	1.737E-7		2034.72482	-1.98E-4	-2.16E-4	1.13E-4	1964.32414	-0.00405	-0.01234
423	0.0683	0.066	-0.74991	-11.8224	-10.4429		1266.16	0.09299	0.11908	3730.97171	69800	3730.97171	48931		3730.97171	-0.01999	-0.01993	-0.01995	-0.01987	-0.01993	-0.01979	-0.02002	-0.0199	-0.01997	-0.01977	-0.02043	-0.02047	2383.8103	6.971E-7	5.338E-7	1.0416E-6	1.1377E-6	6.734E-7	6.011E-7	6.473E-7	8.098E-7	7.594E-7	3.989E-7	7.046E-7	5.734E-7		2033.76049	-1.6E-4	-1.98E-4	1.08E-4	1963.35982	-0.00369	-0.01111
422	0.0683	0.0666	-0.75235	-11.9646	-10.5474		1267.12	0.09256	0.11849	3730.00739	71319	3730.00739	52493		3730.00739	-0.01986	-0.01979	-0.01984	-0.01975	-0.01981	-0.01967	-0.01991	-0.01979	-0.01985	-0.01966	-0.02032	-0.02037	2382.84598	6.203E-7	7.533E-7	8.285E-7	1.326E-6	7.442E-7	9.72E-7	7.82E-7	8.743E-7	7.137E-7	5.766E-7	7.087E-7	7.919E-7		2032.79617	-1.35E-4	-2.04E-4	8.4E-5	1962.3955	-0.00248	-0.00713
421	0.069	0.0671	-0.75479	-12.207	-10.7188		1268.09	0.09211	0.11786	3729.04306	73177	3729.04306	54567		3729.04306	-0.01972	-0.01963	-0.01969	-0.0196	-0.01967	-0.01953	-0.01977	-0.01966	-0.01969	-0.01953	-0.02017	-0.02023	2381.88165	6.061E-7	1.0716E-6	6.175E-7	1.391E-6	6.932E-7	1.2738E-6	8.782E-7	8.609E-7	5.814E-7	7.933E-7	6.758E-7	9.374E-7		2031.83184	-1.29E-4	-1.94E-4	6.3E-5	1961.43118	-0.00127	-0.00318
420	0.0701	0.0674	-0.75723	-12.3199	-10.9487		1269.05	0.09167	0.1172	3728.07874	76229	3728.07874	59443		3728.07874	-0.01957	-0.01947	-0.01953	-0.01945	-0.01952	-0.01938	-0.01962	-0.01951	-0.01954	-0.01938	-0.02002	-0.02008	2380.91733	7.966E-7	1.1308E-6	6.553E-7	1.2512E-6	7.846E-7	1.1883E-6	1.0447E-6	6.761E-7	4.898E-7	9.169E-7	8.699E-7	1.1502E-6		2030.86752	-1.38E-4	-1.74E-4	8.2E-5	1960.46686	-5.77E-4	-9.79124E-4
419	0.0707	0.0676	-0.75967	-12.6125	-11.1201		1270.02	0.09125	0.11657	3727.11441	78148	3727.11441	60970		3727.11441	-0.0194	-0.01932	-0.01936	-0.01929	-0.01937	-0.01923	-0.01947	-0.01933	-0.01939	-0.01921	-0.01986	-0.01993	2379.95301	9.609E-7	9.378E-7	7.805E-7	1.0007E-6	9.616E-7	7.681E-7	1.1511E-6	4.065E-7	4.699E-7	1.0151E-6	1.1111E-6	1.2948E-6		2029.90319	-1.5E-4	-1.55E-4	1.13E-4	1959.50254	-3.28E-4	-3.18368E-4
418	0.0708	0.0686	-0.75723	-10.978	-9.5148		1270.98	0.09085	0.11599	3726.15009	76594	3726.15009	57170		3726.15009	-0.01924	-0.01917	-0.0192	-0.01913	-0.01921	-0.01909	-0.01931	-0.01917	-0.01924	-0.01906	-0.01971	-0.01978	2378.98868	8.446E-7	6.648E-7	7.658E-7	8.217E-7	9.881E-7	3.075E-7	1.0478E-6	2.61E-7	5.013E-7	1.1761E-6	1.1151E-6	1.2576E-6		2028.93887	-1.58E-4	-1.31E-4	1.21E-4	1958.53823	-2.85E-4	-3.2006E-4
417	0.0707	0.0689	-0.75479	-9.97883	-8.65361		1271.94	0.09048	0.11545	3725.18576	73650	3725.18576	53335		3725.18576	-0.01909	-0.01902	-0.01905	-0.01897	-0.01906	-0.01894	-0.01916	-0.01902	-0.01909	-0.01891	-0.01956	-0.01963	2378.02436	5.424E-7	3.673E-7	6.645E-7	7.618E-7	7.87E-7	-3.52E-8	7.93E-7	3.84E-7	6.076E-7	1.3342E-6	1.0171E-6	1.1303E-6		2027.97454	-1.57E-4	-1.08E-4	1.14E-4	1957.57391	-3.03E-4	-4.39691E-4
416	0.0714	0.0691	-0.75235	-9.15109	-7.88858		1272.91	0.09015	0.11501	3724.22144	74686	3724.22144	51105		3724.22144	-0.01894	-0.01886	-0.01891	-0.01882	-0.0189	-0.01879	-0.01902	-0.01886	-0.01894	-0.01875	-0.01941	-0.01948	2377.06003	3.889E-7	2.444E-7	6.377E-7	7.079E-7	5.633E-7	-1.145E-7	5.686E-7	7.419E-7	7.882E-7	1.3214E-6	9.785E-7	9.116E-7		2027.01022	-1.42E-4	-1.03E-4	1.03E-4	1956.60959	-3.19E-4	-5.09667E-4
415	0.072	0.0694	-0.74991	-8.38606	-7.16954		1273.87	0.08989	0.11467	3723.25711	81833	3723.25711	47148		3723.25711	-0.01878	-0.01869	-0.01875	-0.01866	-0.01872	-0.01861	-0.01886	-0.01869	-0.01878	-0.01859	-0.01925	-0.0193	2376.09571	4.932E-7	4.812E-7	7.374E-7	5.744E-7	5.125E-7	1.926E-7	4.688E-7	1.0862E-6	9.502E-7	1.0438E-6	8.372E-7	5.401E-7		2026.04589	-1.11E-4	-1.08E-4	8.6E-5	1955.64527	-3.04E-4	-4.95685E-4
414	0.072	0.0695	-0.74746	-7.85932	-6.74731		1274.84	0.08965	0.1144	3722.29279	92211	3722.29279	42900		3722.29279	-0.01861	-0.01851	-0.01858	-0.01848	-0.01855	-0.01843	-0.01868	-0.01852	-0.01863	-0.01842	-0.01907	-0.01912	2375.13138	7.074E-7	8.786E-7	8.382E-7	3.309E-7	6.022E-7	6.632E-7	5.472E-7	1.1622E-6	1.0738E-6	6.126E-7	5.585E-7	2.692E-7		2025.08157	-7.8E-5	-9.7E-5	8.1E-5	1954.68095	-2.63E-4	-4.16905E-4
413	0.0729	0.0701	-0.74502	-7.34094	-6.16622		1275.8	0.08942	0.11419	3721.32846	102154	3721.32846	43665		3721.32846	-0.01844	-0.01834	-0.0184	-0.01831	-0.01838	-0.01827	-0.0185	-0.01836	-0.01846	-0.01826	-0.01891	-0.01895	2374.16706	9.244E-7	1.1059E-6	8.079E-7	8.65E-8	6.872E-7	9.914E-7	8.112E-7	9.917E-7	1.1907E-6	2.414E-7	3.863E-7	3.432E-7		2024.11724	-6.6E-5	-7.8E-5	9.1E-5	1953.71663	-2.27E-4	-3.13046E-4
412	0.0735	0.0708	-0.74258	-6.8351	-5.77744		1276.77	0.08922	0.11404	3720.36414	111193	3720.36414	49908		3720.36414	-0.01826	-0.01815	-0.01821	-0.01814	-0.01821	-0.0181	-0.01832	-0.0182	-0.01829	-0.0181	-0.01874	-0.01878	2373.20273	1.0134E-6	1.119E-6	6.384E-7	5.56E-8	6.814E-7	1.1762E-6	1.0207E-6	7.998E-7	1.1655E-6	6.92E-8	3.249E-7	4.556E-7		2023.15292	-7.9E-5	-8.5E-5	9.4E-5	1952.75232	-2.2E-4	-2.45035E-4
411	0.074	0.0712	-0.74014	-6.38361	-5.26324		1277.73	0.08906	0.11392	3719.39982	120789	3719.39981	58556		3719.39982	-0.01808	-0.01796	-0.01802	-0.01796	-0.01804	-0.01791	-0.01814	-0.01802	-0.0181	-0.01791	-0.01857	-0.01862	2372.23841	9.085E-7	1.1088E-6	4.045E-7	2.565E-7	5.817E-7	1.3098E-6	9.314E-7	6.901E-7	9E-7	1.477E-7	2.077E-7	3.034E-7		2022.1886	-9.6E-5	-1.1E-4	9E-5	1951.788	-2.37E-4	-2.7823E-4
410	0.0744	0.0715	-0.7377	-5.94048	-5.05839		1278.69	0.08891	0.11381	3718.43549	130402	3718.43549	67301		3718.43549	-0.01789	-0.01777	-0.01786	-0.01778	-0.01785	-0.01772	-0.01796	-0.01783	-0.0179	-0.01771	-0.01839	-0.01844	2371.27408	8.128E-7	1.1131E-6	3.162E-7	5.211E-7	4.672E-7	1.354E-6	6.679E-7	5.619E-7	5.688E-7	3.736E-7	1.549E-7	1.837E-7		2021.22427	-1.02E-4	-1.18E-4	9.4E-5	1950.82368	-2.72E-4	-4.49895E-4
409	0.0744	0.0719	-0.73526	-5.68129	-4.70263		1279.66	0.08878	0.11372	3717.47117	138873	3717.47117	73918		3717.47117	-0.01768	-0.01758	-0.01768	-0.01757	-0.01766	-0.01752	-0.01777	-0.01764	-0.01771	-0.01752	-0.01821	-0.01825	2370.30976	8.123E-7	8.904E-7	4.637E-7	6.75E-7	4.556E-7	1.1811E-6	4.487E-7	3.072E-7	3.621E-7	5.048E-7	4.144E-7	4.392E-7		2020.25995	-9.5E-5	-1.05E-4	1E-4	1949.85936	-3.44E-4	-8.20313E-4
408	0.0741	0.072	-0.73282	-5.28832	-4.37154		1280.62	0.08866	0.11364	3716.50684	146033	3716.50684	78817		3716.50684	-0.01746	-0.01738	-0.01747	-0.01735	-0.01745	-0.01733	-0.01756	-0.01743	-0.01751	-0.01732	-0.01802	-0.01804	2369.34544	7.174E-7	3.823E-7	6.406E-7	6.404E-7	5.583E-7	7.841E-7	3.06E-7	-2.31E-8	2.723E-7	5.188E-7	9.166E-7	8.888E-7		2019.29562	-9.1E-5	-9E-5	9.5E-5	1948.89504	-4.65E-4	-0.00148
407	0.0745	0.0722	-0.73037	-4.91584	-4.07096		1281.59	0.08853	0.11355	3715.54252	150620	3715.54252	85501		3715.54252	-0.01724	-0.01717	-0.01724	-0.01713	-0.01723	-0.01712	-0.01735	-0.01721	-0.0173	-0.01712	-0.0178	-0.01783	2368.38111	4.772E-7	3.69E-8	6.435E-7	5.752E-7	6.476E-7	4.501E-7	1.673E-7	-1.352E-7	1.706E-7	6.984E-7	1.2071E-6	1.12E-6		2018.3313	-9.4E-5	-8.5E-5	9.5E-5	1947.93073	-6.54E-4	-0.0024
406	0.0751	0.0725	-0.72793	-4.73148	-3.87657		1282.55	0.0884	0.11345	3714.57819	152853	3714.57819	91707		3714.57819	-0.01701	-0.01695	-0.01701	-0.01691	-0.01701	-0.0169	-0.01712	-0.01699	-0.01707	-0.01691	-0.01758	-0.01763	2367.41679	2.862E-7	8.82E-8	5.084E-7	6.449E-7	6.25E-7	3.654E-7	-2.47E-8	1.387E-7	1.81E-8	1.0453E-6	1.0804E-6	1.0043E-6		2017.36697	-9.6E-5	-8.1E-5	1.05E-4	1946.96641	-9.31E-4	-0.00348
405	0.0756	0.0729	-0.72549	-4.41961	-3.6433		1283.52	0.08829	0.11335	3713.61387	156412	3713.61387	92655		3713.61387	-0.01677	-0.01672	-0.01677	-0.01668	-0.01676	-0.01665	-0.01688	-0.01675	-0.01682	-0.01665	-0.01733	-0.01738	2366.45246	3.753E-7	2.748E-7	4.916E-7	7.405E-7	6.384E-7	3.811E-7	-5.89E-8	5.225E-7	6.31E-8	1.2132E-6	9.028E-7	8.019E-7		2016.40265	-1.02E-4	-7.7E-5	1.18E-4	1946.00209	-0.0013	-0.00465
404	0.0755	0.0731	-0.72305	-4.10482	-3.39372		1284.48	0.08817	0.11323	3712.64954	162249	3712.64954	90522		3712.64954	-0.01652	-0.01647	-0.0165	-0.01643	-0.0165	-0.01639	-0.01663	-0.01649	-0.01656	-0.01639	-0.01707	-0.01712	2365.48814	6.443E-7	5.342E-7	6.745E-7	7.958E-7	8.702E-7	4.495E-7	2.93E-7	7.786E-7	4.407E-7	1.1703E-6	8.584E-7	8.003E-7		2015.43832	-1.14E-4	-8.9E-5	1.32E-4	1945.03777	-0.0018	-0.00614
403	0.0755	0.0725	-0.72061	-3.95182	-3.19348		1285.44	0.08802	0.11308	3711.68522	167235	3711.68522	89056		3711.68522	-0.01631	-0.01623	-0.01627	-0.01621	-0.01627	-0.01616	-0.0164	-0.01627	-0.01634	-0.01616	-0.01684	-0.0169	2364.52381	7.694E-7	8.722E-7	8.535E-7	8.719E-7	1.1806E-6	6.49E-7	8.112E-7	9.379E-7	8.581E-7	1.1473E-6	7.379E-7	9.525E-7		2014.474	-1.29E-4	-1.13E-4	1.36E-4	1944.07345	-0.00265	-0.00864
402	0.0764	0.0735	-0.71817	-3.62574	-3.02375		1286.41	0.08788	0.11292	3710.72089	171329	3710.72089	90019		3710.72089	-0.01608	-0.01599	-0.01603	-0.01598	-0.01605	-0.01594	-0.01617	-0.01606	-0.01613	-0.01595	-0.01662	-0.0167	2363.55949	8.315E-7	1.035E-6	9.639E-7	9.41E-7	1.3776E-6	8.141E-7	1.1979E-6	9.905E-7	1.1312E-6	1.1202E-6	5.765E-7	1.1055E-6		2013.50967	-1.48E-4	-1.33E-4	1.27E-4	1943.10913	-0.00428	-0.01368
401	0.0762	0.0734	-0.71573	-3.5091	-2.79633		1287.37	0.08773	0.11272	3709.75657	177106	3709.75657	95132		3709.75657	-0.01582	-0.01573	-0.01578	-0.01573	-0.01581	-0.0157	-0.01593	-0.01583	-0.0159	-0.01572	-0.01638	-0.01647	2362.59516	1.0531E-6	9.147E-7	1.0202E-6	9.873E-7	1.3983E-6	7.229E-7	1.3736E-6	9.613E-7	1.3318E-6	9.18E-7	5.66E-7	1.1578E-6		2012.54535	-1.59E-4	-1.46E-4	1.12E-4	1942.14482	-0.00721	-0.02294
400	0.0762	0.0737	-0.71328	-3.3561	-2.59065		1288.34	0.08753	0.11245	3708.79225	183612	3708.79224	104228		3708.79225	-0.01555	-0.01547	-0.01553	-0.01547	-0.01556	-0.01544	-0.01567	-0.01558	-0.01565	-0.01547	-0.01613	-0.01623	2361.63084	1.2417E-6	6.911E-7	8.861E-7	1.0623E-6	1.1554E-6	5.764E-7	1.3077E-6	1.0514E-6	1.4185E-6	6.573E-7	6.194E-7	9.231E-7		2011.58103	-1.48E-4	-1.52E-4	9.3E-5	1941.1805	-0.01115	-0.0354
399	0.0767	0.0743	-0.71084	-3.07224	-2.38413		1289.3	0.08729	0.11212	3707.82792	189003	3707.82792	113570		3707.82792	-0.01527	-0.01523	-0.01528	-0.01522	-0.01531	-0.01519	-0.01543	-0.01533	-0.0154	-0.01522	-0.0159	-0.01598	2360.66651	1.116E-6	5.542E-7	5.582E-7	1.1463E-6	6.357E-7	7.26E-7	1.0439E-6	1.2335E-6	1.2999E-6	5.796E-7	6.069E-7	4.731E-7		2010.6167	-1.31E-4	-1.42E-4	8.5E-5	1940.21618	-0.01419	-0.04502
398	0.0768	0.0745	-0.7084	-2.97024	-2.23782		1290.27	0.08703	0.11175	3706.8636	194516	3706.8636	117350		3706.8636	-0.01499	-0.01496	-0.01503	-0.01495	-0.01504	-0.01492	-0.01517	-0.01507	-0.01514	-0.01495	-0.01564	-0.01571	2359.70219	7.372E-7	6.028E-7	3.155E-7	1.181E-6	1.006E-7	1.1039E-6	7.771E-7	1.2474E-6	1.0773E-6	6.049E-7	6.089E-7	2.759E-7		2009.65238	-1.27E-4	-1.33E-4	9.6E-5	1939.25186	-0.01409	-0.04489
397	0.0769	0.0744	-0.70596	-2.81305	-2.11282		1291.23	0.08674	0.11134	3705.89927	201356	3705.89927	115716		3705.89927	-0.0147	-0.01466	-0.01475	-0.01467	-0.01476	-0.01465	-0.01489	-0.01479	-0.01487	-0.01467	-0.01536	-0.01542	2358.73787	4.109E-7	8.517E-7	3.054E-7	1.1777E-6	-7.16E-8	1.4169E-6	6.842E-7	1.1648E-6	9.031E-7	5.375E-7	7.303E-7	4.656E-7		2008.68805	-1.31E-4	-1.22E-4	1.08E-4	1938.28754	-0.01084	-0.03486
396	0.077	0.0746	-0.70352	-2.55303	-2.00371		1292.19	0.08642	0.11091	3704.93495	209153	3704.93495	116443		3704.93495	-0.01441	-0.01435	-0.01446	-0.01437	-0.01447	-0.01436	-0.0146	-0.0145	-0.01458	-0.01439	-0.01506	-0.01513	2357.77354	3.44E-7	1.2095E-6	4.223E-7	1.1371E-6	1.886E-7	1.5642E-6	7.513E-7	1.2247E-6	7.712E-7	4.687E-7	9.123E-7	6.961E-7		2007.72373	-1.25E-4	-9.2E-5	1.03E-4	1937.32322	-0.00672	-0.02166
395	0.0772	0.0747	-0.70108	-2.42719	-1.88707		1293.16	0.08613	0.11052	3703.97062	216877	3703.97062	122952		3703.97062	-0.0141	-0.01404	-0.01414	-0.01405	-0.01415	-0.01405	-0.01428	-0.01419	-0.01427	-0.01408	-0.01475	-0.01482	2356.80922	5.161E-7	1.5293E-6	6.743E-7	1.0313E-6	6.06E-7	1.5469E-6	8.736E-7	1.3477E-6	6.587E-7	5.08E-7	1.0553E-6	7.919E-7		2006.7594	-1.09E-4	-7.6E-5	8.8E-5	1936.35891	-0.00367	-0.01158
394	0.0772	0.0745	-0.69864	-2.27335	-1.81391		1294.12	0.08587	0.11019	3703.0063	224466	3703.0063	130388		3703.0063	-0.01377	-0.0137	-0.01378	-0.01371	-0.01381	-0.01372	-0.01395	-0.01385	-0.01394	-0.01375	-0.01442	-0.01448	2355.84489	7.822E-7	1.658E-6	1.0912E-6	9.338E-7	9.599E-7	1.3491E-6	1.0173E-6	1.3358E-6	6.361E-7	6.157E-7	1.1879E-6	8.749E-7		2005.79508	-1.09E-4	-8.8E-5	8.3E-5	1935.39459	-0.00198	-0.00593
393	0.0769	0.0746	-0.69619	-2.15128	-1.69268		1295.09	0.08564	0.10988	3702.04197	234616	3702.04197	137025		3702.04197	-0.01343	-0.01335	-0.01342	-0.01337	-0.01346	-0.01337	-0.01362	-0.01352	-0.0136	-0.01341	-0.01409	-0.01414	2354.88057	9.518E-7	1.617E-6	1.4452E-6	9.658E-7	1.2117E-6	1.0749E-6	1.1809E-6	1.2193E-6	7.459E-7	8.956E-7	1.292E-6	1.0321E-6		2004.83075	-1.32E-4	-1.04E-4	9.3E-5	1934.43027	-0.00116	-0.00316
392	0.0774	0.0743	-0.69375	-1.98824	-1.46902		1296.05	0.08544	0.10963	3701.07765	247677	3701.07765	146592		3701.07765	-0.01309	-0.01301	-0.0131	-0.01304	-0.01313	-0.01304	-0.01329	-0.01319	-0.01327	-0.01308	-0.01377	-0.01382	2353.91624	9.323E-7	1.5305E-6	1.5465E-6	1.0867E-6	1.3255E-6	8.67E-7	1.2827E-6	1.1334E-6	9.032E-7	1.3375E-6	1.2788E-6	1.2062E-6		2003.86643	-1.55E-4	-1.16E-4	1.11E-4	1933.46595	-7.44E-4	-0.00175
391	0.077	0.0742	-0.69131	-1.8808	-1.39169		1297.02	0.08527	0.10943	3700.11332	259504	3700.11332	159053		3700.11332	-0.01273	-0.01266	-0.01276	-0.01269	-0.01278	-0.0127	-0.01295	-0.01284	-0.01292	-0.01274	-0.01344	-0.01348	2352.95192	9.04E-7	1.2974E-6	1.5275E-6	1.0676E-6	1.3432E-6	7.192E-7	1.2894E-6	1.0918E-6	1.029E-6	1.6277E-6	1.2152E-6	1.3571E-6		2002.9021	-1.59E-4	-1.23E-4	1.25E-4	1932.50163	-5.19E-4	-9.68679E-4
390	0.0767	0.0744	-0.68887	-1.76751	-1.26418		1297.98	0.08509	0.10924	3699.149	269456	3699.149	170056		3699.149	-0.01235	-0.01231	-0.01239	-0.01232	-0.01242	-0.01233	-0.01259	-0.01246	-0.01256	-0.01239	-0.01308	-0.01314	2351.98759	1.0818E-6	8.589E-7	1.4584E-6	9.033E-7	1.4189E-6	5.465E-7	1.2996E-6	1.0398E-6	1.1517E-6	1.6521E-6	1.1673E-6	1.4872E-6		2001.93778	-1.4E-4	-1.24E-4	1.23E-4	1931.53731	-4.01E-4	-5.89422E-4
389	0.0766	0.0745	-0.68643	-1.62537	-1.21694		1298.95	0.08494	0.10909	3698.18468	281435	3698.18467	178246		3698.18468	-0.01195	-0.01192	-0.01199	-0.01194	-0.01204	-0.01195	-0.01222	-0.01207	-0.01217	-0.01201	-0.01272	-0.01277	2351.02327	1.3319E-6	4.346E-7	1.1816E-6	8.337E-7	1.4738E-6	3.456E-7	1.299E-6	1.0285E-6	1.2099E-6	1.5898E-6	1.0778E-6	1.4465E-6		2000.97346	-1.07E-4	-1.29E-4	1.07E-4	1930.573	-3.39E-4	-4.49429E-4
388	0.0765	0.0741	-0.68399	-1.62537	-1.17973		1299.91	0.08482	0.10901	3697.22035	295567	3697.22035	185374		3697.22035	-0.01154	-0.01151	-0.01159	-0.01154	-0.01166	-0.01154	-0.01182	-0.01169	-0.01176	-0.01161	-0.01232	-0.01238	2350.05894	1.3988E-6	1.872E-7	7.668E-7	8.496E-7	1.2731E-6	2.936E-7	1.1502E-6	1.0928E-6	1.1185E-6	1.5405E-6	9.972E-7	1.1186E-6		2000.00913	-8.2E-5	-1.32E-4	9.1E-5	1929.60868	-3.03E-4	-3.75926E-4
387	0.0764	0.0745	-0.68155	-1.44394	-1.0794		1300.87	0.08472	0.10898	3696.25603	308758	3696.25603	190802		3696.25603	-0.01112	-0.01108	-0.01118	-0.01114	-0.01124	-0.01112	-0.01141	-0.01128	-0.01137	-0.01119	-0.01191	-0.01198	2349.09462	1.2726E-6	2.097E-7	5.518E-7	8.322E-7	9.595E-7	5.604E-7	8.838E-7	1.103E-6	1.0101E-6	1.4482E-6	1.0271E-6	7.401E-7		1999.04481	-7.8E-5	-1.22E-4	8.7E-5	1928.64436	-2.79E-4	-2.78682E-4
386	0.0761	0.0746	-0.6791	-1.40673	-1.07648		1301.84	0.08467	0.10902	3695.2917	319750	3695.2917	194373		3695.2917	-0.01069	-0.01065	-0.01076	-0.0107	-0.01081	-0.01071	-0.01098	-0.01087	-0.01096	-0.01078	-0.01149	-0.01157	2348.1303	1.1277E-6	5.425E-7	6.802E-7	8.115E-7	8.546E-7	9.689E-7	7.151E-7	1.0096E-6	1.038E-6	1.2475E-6	1.0927E-6	6.102E-7		1998.08048	-9.8E-5	-1.08E-4	8.9E-5	1927.68004	-2.49E-4	-1.50955E-4
385	0.0759	0.0748	-0.67666	-1.19269	-0.96026		1302.8	0.08468	0.10913	3694.32738	328049	3694.32738	198330		3694.32738	-0.01023	-0.0102	-0.01031	-0.01025	-0.01037	-0.01026	-0.01053	-0.01044	-0.01052	-0.01035	-0.01105	-0.01113	2347.16597	1.1706E-6	9.742E-7	9.862E-7	8.285E-7	9.542E-7	1.2257E-6	7.758E-7	8.808E-7	1.158E-6	9.653E-7	1.1179E-6	6.69E-7		1997.11616	-1.24E-4	-1.1E-4	8.9E-5	1926.71572	-1.98E-4	2.32752E-5
384	0.0759	0.075	-0.67422	-1.10532	-0.7805		1303.77	0.08473	0.1093	3693.36305	334686	3693.36305	201414		3693.36305	-0.00976	-0.00973	-0.00984	-0.00978	-0.00992	-0.0098	-0.01007	-0.01	-0.01006	-0.00989	-0.01059	-0.01067	2346.20165	1.3348E-6	1.2474E-6	1.2365E-6	8.858E-7	1.05E-6	1.2904E-6	9.163E-7	6.677E-7	1.2094E-6	7.131E-7	1.0859E-6	6.762E-7		1996.15183	-1.34E-4	-1.23E-4	9.3E-5	1925.75141	-1.27E-4	2.45494E-4
383	0.076	0.0751	-0.67178	-1.09278	-0.71236		1304.73	0.08477	0.10947	3692.39873	342710	3692.39873	204313		3692.39873	-0.00926	-0.00924	-0.00935	-0.00929	-0.00944	-0.00931	-0.0096	-0.00952	-0.00958	-0.00941	-0.01011	-0.01019	2345.23732	1.3008E-6	1.2984E-6	1.3202E-6	9.389E-7	1.0104E-6	1.2397E-6	9.343E-7	3.644E-7	1.1125E-6	5.108E-7	9.664E-7	6.229E-7		1995.18751	-1.4E-4	-1.42E-4	1.03E-4	1924.78709	-4.5E-5	4.85806E-4
382	0.0756	0.0745	-0.66934	-1.05432	-0.71779		1305.7	0.08481	0.10964	3691.4344	352029	3691.4344	211738		3691.4344	-0.00875	-0.00873	-0.00884	-0.00879	-0.00893	-0.00882	-0.0091	-0.00901	-0.00909	-0.00892	-0.00961	-0.0097	2344.273	1.0116E-6	1.1718E-6	1.2201E-6	9.732E-7	8.832E-7	1.1903E-6	9.002E-7	1.915E-7	9.844E-7	2.999E-7	8.388E-7	7.173E-7		1994.22318	-1.62E-4	-1.77E-4	1.13E-4	1923.82277	5.2E-5	7.74079E-4
381	0.0751	0.074	-0.6669	-0.90591	-0.59321		1306.66	0.08484	0.10977	3690.47008	359702	3690.47008	222403		3690.47008	-0.00821	-0.00819	-0.0083	-0.00828	-0.0084	-0.0083	-0.00858	-0.00848	-0.00857	-0.00841	-0.0091	-0.00918	2343.30867	6.74E-7	9.921E-7	9.799E-7	1.0505E-6	7.629E-7	1.2274E-6	9.59E-7	3.805E-7	9.575E-7	1.316E-7	7.9E-7	1.0018E-6		1993.25886	-1.97E-4	-2.25E-4	1.13E-4	1922.85845	1.79E-4	0.00118
380	0.0751	0.0742	-0.66446	-0.76879	-0.5443		1307.62	0.08484	0.10982	3689.50575	364959	3689.50575	232137		3689.50575	-0.00764	-0.00764	-0.00774	-0.00772	-0.00785	-0.00775	-0.00802	-0.00792	-0.00802	-0.00786	-0.00856	-0.00864	2342.34435	4.14E-7	8.619E-7	7.346E-7	1.1451E-6	6.461E-7	1.2074E-6	1.0263E-6	8.364E-7	9.994E-7	9.27E-8	7.964E-7	1.2832E-6		1992.29453	-2.33E-4	-2.79E-4	1.04E-4	1921.89413	3.46E-4	0.00173
379	0.0753	0.0746	-0.66202	-0.69271	-0.47574		1308.59	0.08481	0.10978	3688.54143	368745	3688.54143	240836		3688.54143	-0.00708	-0.00708	-0.00717	-0.00716	-0.0073	-0.00719	-0.00747	-0.00737	-0.00747	-0.0073	-0.008	-0.00809	2341.38002	2.662E-7	7.703E-7	6.155E-7	1.1568E-6	6.269E-7	1.0152E-6	9.759E-7	1.2583E-6	1.0511E-6	2.424E-7	8.319E-7	1.4949E-6		1991.33021	-2.82E-4	-3.43E-4	9.2E-5	1920.92981	5.57E-4	0.00246
378	0.0752	0.0744	-0.65957	-0.59739	-0.42307		1309.55	0.08474	0.10971	3687.57711	372589	3687.5771	250736		3687.57711	-0.00652	-0.00652	-0.00662	-0.0066	-0.00676	-0.00665	-0.00692	-0.00684	-0.00694	-0.00677	-0.00748	-0.00756	2340.4157	2.871E-7	7.21E-7	6.124E-7	1.1129E-6	7.768E-7	8.402E-7	8.509E-7	1.5175E-6	1.0862E-6	5.675E-7	8.581E-7	1.6335E-6		1990.36589	-3.35E-4	-4.07E-4	8.5E-5	1919.9655	8.28E-4	0.00341
377	0.0747	0.0742	-0.65713	-0.59823	-0.40509		1310.52	0.08462	0.10958	3686.61278	378574	3686.61278	264294		3686.61278	-0.00592	-0.00594	-0.00605	-0.00603	-0.00619	-0.00609	-0.00636	-0.00629	-0.00638	-0.00622	-0.00694	-0.00702	2339.45137	5.046E-7	7.531E-7	6.639E-7	1.0867E-6	8.96E-7	8.482E-7	7.772E-7	1.6578E-6	9.977E-7	9.296E-7	8.468E-7	1.5409E-6		1989.40156	-3.52E-4	-4.31E-4	8.9E-5	1919.00118	0.00116	0.00457
376	0.0751	0.0742	-0.65469	-0.47407	-0.25376		1311.48	0.08448	0.10941	3685.64846	386435	3685.64846	279877		3685.64846	-0.0053	-0.00532	-0.00544	-0.00541	-0.00558	-0.00548	-0.00576	-0.00569	-0.00578	-0.00562	-0.00635	-0.00643	2338.48705	8.235E-7	8.601E-7	7.97E-7	1.0408E-6	8.988E-7	9.546E-7	7.728E-7	1.7234E-6	7.796E-7	1.2092E-6	8.926E-7	1.2161E-6		1988.43724	-3.27E-4	-4.04E-4	9.5E-5	1918.03686	0.00153	0.00586
375	0.0748	0.0742	-0.65225	-0.38711	-0.22909		1312.45	0.08435	0.10923	3684.68413	394015	3684.68413	290082		3684.68413	-0.00466	-0.00466	-0.0048	-0.00477	-0.00494	-0.00484	-0.00514	-0.00506	-0.00514	-0.00498	-0.00572	-0.00581	2337.52273	1.0789E-6	1.0718E-6	1.0385E-6	1.0205E-6	9.538E-7	1.0522E-6	7.619E-7	1.7033E-6	6.172E-7	1.4024E-6	1.0331E-6	9.258E-7		1987.47291	-2.99E-4	-3.61E-4	9.3E-5	1917.07254	0.00187	0.00705
374	0.0743	0.0741	-0.64981	-0.38962	-0.10535		1313.41	0.08421	0.10902	3683.71981	400977	3683.71981	292113		3683.71981	-0.00398	-0.00397	-0.00414	-0.00411	-0.00429	-0.00418	-0.00449	-0.00441	-0.00448	-0.00433	-0.00508	-0.00517	2336.5584	1.203E-6	1.3672E-6	1.2916E-6	1.1197E-6	1.0562E-6	1.0919E-6	7.802E-7	1.4985E-6	5.836E-7	1.5818E-6	1.1278E-6	8.397E-7		1986.50859	-2.87E-4	-3.19E-4	8.5E-5	1916.10822	0.0021	0.00787
373	0.0741	0.0739	-0.64737	-0.329	-0.0949		1314.37	0.08405	0.10874	3682.75548	407585	3682.75548	289391		3682.75548	-0.00327	-0.00327	-0.00345	-0.00341	-0.0036	-0.00348	-0.0038	-0.00372	-0.00379	-0.00366	-0.0044	-0.0045	2335.59408	1.333E-6	1.5818E-6	1.3987E-6	1.2702E-6	1.1103E-6	1.0842E-6	8.989E-7	1.0859E-6	5.995E-7	1.7852E-6	1.0784E-6	8.631E-7		1985.54426	-2.78E-4	-2.77E-4	8E-5	1915.1439	0.00214	0.00806
372	0.0735	0.0733	-0.64493	-0.22784	-0.00543		1315.34	0.08387	0.1084	3681.79116	412253	3681.79116	282780		3681.79116	-0.00253	-0.00254	-0.00272	-0.00269	-0.00287	-0.00276	-0.00307	-0.003	-0.00308	-0.00296	-0.00368	-0.0038	2334.62975	1.5507E-6	1.516E-6	1.2951E-6	1.2534E-6	1.1653E-6	1.0639E-6	1.0648E-6	6.274E-7	6.638E-7	1.8334E-6	9.11E-7	8.553E-7		1984.57994	-2.59E-4	-2.57E-4	8.1E-5	1914.17959	0.00197	0.00756
371	0.0736	0.0736	-0.64248	-0.13169	-0.03846		1316.3	0.08364	0.10798	3680.82683	413420	3680.82683	274926		3680.82683	-0.00176	-0.00179	-0.00195	-0.00194	-0.0021	-0.00201	-0.00232	-0.00225	-0.00234	-0.00221	-0.00294	-0.00306	2333.66543	1.7243E-6	1.1931E-6	1.1916E-6	9.679E-7	1.2449E-6	1.0521E-6	1.2803E-6	3.51E-7	8.744E-7	1.5654E-6	8.248E-7	8.985E-7		1983.61561	-2.39E-4	-2.61E-4	8.3E-5	1913.21527	0.00167	0.00658
370	0.0737	0.0734	-0.64004	-0.10618	0.02299		1317.27	0.08334	0.10744	3679.86251	411663	3679.86251	269980		3679.86251	-9.63E-4	-0.001	-0.00115	-0.00116	-0.0013	-0.00124	-0.00154	-0.00148	-0.00158	-0.00144	-0.00216	-0.00229	2332.7011	1.7138E-6	8.775E-7	1.2694E-6	6.784E-7	1.2765E-6	1.101E-6	1.4929E-6	3.728E-7	1.1948E-6	1.156E-6	9.331E-7	1.0235E-6		1982.65129	-2.43E-4	-2.59E-4	9.1E-5	1912.25095	0.00132	0.0054
369	0.0737	0.073	-0.6376	-0.13419	0.10368		1318.23	0.083	0.10682	3678.89818	409824	3678.89818	266918		3678.89818	-1.36E-4	-1.69E-4	-3.34E-4	-3.4E-4	-4.93E-4	-4.36E-4	-7.31E-4	-6.79E-4	-7.8E-4	-6.28E-4	-0.00135	-0.0015	2331.73678	1.4869E-6	7.533E-7	1.336E-6	6.964E-7	1.2119E-6	1.176E-6	1.5256E-6	6.087E-7	1.4408E-6	8.751E-7	1.0032E-6	1.0049E-6		1981.68696	-2.72E-4	-2.46E-4	1.03E-4	1911.28663	9.86E-4	0.00419
368	0.0735	0.0734	-0.63516	-0.01045	0.10618		1319.2	0.08263	0.10613	3677.93386	409397	3677.93386	266627		3677.93386	7.22E-4	6.94E-4	5.13E-4	5.12E-4	3.47E-4	4.15E-4	1.12E-4	1.58E-4	6.4E-5	2.14E-4	-5.18E-4	-6.76E-4	2330.77245	1.1289E-6	7.883E-7	1.2346E-6	8.204E-7	1.0825E-6	1.1037E-6	1.3852E-6	7.616E-7	1.5257E-6	7.437E-7	9.184E-7	7.763E-7		1980.72264	-3.03E-4	-2.59E-4	1.12E-4	1910.32231	6.86E-4	0.00309
367	0.0727	0.0726	-0.63272	0.07985	0.15259		1320.16	0.08222	0.10537	3676.96953	407143	3676.96953	273489		3676.96953	0.00161	0.00159	0.0014	0.0014	0.00122	0.00131	9.85E-4	0.00104	9.47E-4	0.00108	3.53E-4	1.92E-4	2329.80813	8.524E-7	9.016E-7	1.0897E-6	7.159E-7	1.0257E-6	9.186E-7	1.181E-6	6.316E-7	1.4688E-6	6.323E-7	8.933E-7	6.241E-7		1979.75832	-3.33E-4	-3.04E-4	1.15E-4	1909.35799	4.39E-4	0.00218
366	0.0724	0.0726	-0.63028	0.06438	0.27926		1321.12	0.08177	0.10458	3676.00521	400688	3676.00521	286616		3676.00521	0.00251	0.00248	0.00231	0.00228	0.00211	0.0022	0.00186	0.00192	0.00182	0.00195	0.00122	0.00107	2328.8438	7.487E-7	1.0202E-6	9.385E-7	5.793E-7	1.0356E-6	9.082E-7	9.049E-7	4.639E-7	1.2369E-6	5.129E-7	9.599E-7	6.927E-7		1978.79399	-3.73E-4	-3.3E-4	1.11E-4	1908.39368	2.37E-4	0.00148
365	0.0723	0.0727	-0.62784	0.13169	0.27842		1322.09	0.08132	0.10382	3675.04089	392734	3675.04089	298597		3675.04089	0.0034	0.00336	0.00319	0.00314	0.00297	0.00305	0.00271	0.00277	0.00267	0.0028	0.00206	0.00191	2327.87948	6.997E-7	1.0578E-6	7.367E-7	6.552E-7	9.422E-7	9.849E-7	6.408E-7	5.887E-7	8.675E-7	4.811E-7	9.656E-7	7.964E-7		1977.82967	-3.91E-4	-3.15E-4	1.14E-4	1907.42936	7.7E-5	9.01485E-4
364	0.0721	0.0726	-0.62539	0.18311	0.32399		1323.05	0.08088	0.10308	3674.07656	386136	3674.07656	303769		3674.07656	0.0043	0.00425	0.00406	0.00401	0.00384	0.0039	0.00357	0.00362	0.00351	0.00365	0.0029	0.00274	2326.91516	6.773E-7	1.0126E-6	6.207E-7	7.783E-7	8.308E-7	7.874E-7	5.256E-7	8.711E-7	5.741E-7	5.856E-7	9.977E-7	8.861E-7		1976.86534	-3.53E-4	-2.94E-4	1.28E-4	1906.46504	-4.1E-5	4.48029E-4
363	0.072	0.0723	-0.62295	0.24414	0.32984		1324.02	0.08044	0.10238	3673.11224	381213	3673.11224	303848		3673.11224	0.00525	0.00519	0.00497	0.00495	0.00477	0.00481	0.00448	0.00453	0.00442	0.00456	0.0038	0.00363	2325.95083	7.05E-7	9.949E-7	6.582E-7	8.777E-7	8.106E-7	4.6E-7	5.166E-7	9.875E-7	4.857E-7	7.497E-7	1.1607E-6	1.0772E-6		1975.90102	-2.83E-4	-2.78E-4	1.38E-4	1905.50072	-1.18E-4	1.80665E-4
362	0.0717	0.0724	-0.62051	0.24163	0.40509		1324.98	0.08003	0.10174	3672.14791	377268	3672.14791	305687		3672.14791	0.00627	0.00621	0.00599	0.00596	0.00578	0.0058	0.00547	0.00553	0.0054	0.00554	0.00479	0.00462	2324.98651	7.07E-7	1.1176E-6	6.957E-7	1.1179E-6	7.566E-7	4.579E-7	5.893E-7	1.0599E-6	5.496E-7	1.006E-6	1.2882E-6	1.3022E-6		1974.93669	-2.15E-4	-2.33E-4	1.31E-4	1904.5364	-1.53E-4	1.12393E-4
361	0.0717	0.0726	-0.61807	0.34196	0.48912		1325.95	0.07967	0.10117	3671.18359	372311	3671.18359	312043		3671.18359	0.00733	0.00727	0.00706	0.00701	0.00683	0.00684	0.00651	0.00657	0.00644	0.00658	0.00583	0.00567	2324.02218	7.485E-7	1.2747E-6	6.342E-7	1.4204E-6	7.118E-7	7.647E-7	7.964E-7	1.3371E-6	7.12E-7	1.3521E-6	1.2023E-6	1.3673E-6		1973.97237	-1.32E-4	-1.11E-4	1.21E-4	1903.57208	-1.46E-4	1.74859E-4
360	0.0715	0.0725	-0.61563	0.3474	0.45693		1326.91	0.07934	0.10067	3670.21926	363436	3670.21926	315078		3670.21926	0.0084	0.00834	0.00812	0.00805	0.00788	0.0079	0.00755	0.0076	0.00748	0.00761	0.00685	0.00669	2323.05786	1.0155E-6	1.1957E-6	6.714E-7	1.5006E-6	8.596E-7	9.735E-7	1.1489E-6	1.6059E-6	1.0452E-6	1.5066E-6	1.0898E-6	1.2993E-6		1973.00804	5.1E-5	1.86E-4	1.2E-4	1902.60777	-1.03E-4	2.89751E-4
359	0.0712	0.0723	-0.61319	0.43101	0.52632		1327.87	0.07905	0.10024	3669.25494	349389	3669.25494	309389		3669.25494	0.00948	0.00942	0.00918	0.00912	0.00893	0.00896	0.0086	0.00865	0.00852	0.00866	0.00787	0.0077	2322.09353	1.3454E-6	9.594E-7	9.987E-7	1.3826E-6	1.1342E-6	1.0189E-6	1.5175E-6	1.6336E-6	1.4751E-6	1.4337E-6	1.1897E-6	1.2408E-6		1972.04372	4.43E-4	7.61E-4	1.17E-4	1901.64345	-4.1E-5	4.13284E-4
358	0.0711	0.0723	-0.61075	0.50333	0.54179		1328.84	0.07882	0.0999	3668.29061	330898	3668.29061	302054		3668.29061	0.01059	0.01053	0.01027	0.01022	0.01001	0.01006	0.00968	0.00973	0.0096	0.00972	0.00893	0.00876	2321.12921	1.323E-6	8.163E-7	1.3063E-6	1.2584E-6	1.3055E-6	1.1249E-6	1.6227E-6	1.4841E-6	1.5925E-6	1.3528E-6	1.253E-6	1.0573E-6		1971.07939	9.68E-4	0.00149	1.04E-4	1900.67913	2.4E-5	5.51171E-4
357	0.0708	0.0721	-0.6083	0.54305	0.63418		1329.8	0.07863	0.09962	3667.32629	309532	3667.32629	301194		3667.32629	0.01175	0.01169	0.01141	0.01136	0.01113	0.0112	0.01082	0.01086	0.01071	0.01083	0.01003	0.00986	2320.16488	1.0034E-6	7.006E-7	1.2765E-6	1.0223E-6	1.3527E-6	1.2024E-6	1.4521E-6	1.1837E-6	1.3222E-6	1.1836E-6	1.1172E-6	6.994E-7		1970.11507	0.00128	0.0019	1E-4	1899.71481	8.7E-5	7.52315E-4
356	0.0708	0.0724	-0.60586	0.54388	0.68978		1330.77	0.07849	0.09939	3666.36196	287420	3666.36196	307230		3666.36196	0.01296	0.01289	0.01259	0.01253	0.0123	0.01237	0.01198	0.01202	0.01186	0.01199	0.01117	0.011	2319.20056	8.117E-7	5.026E-7	1.089E-6	5.25E-7	1.3698E-6	9.825E-7	1.2245E-6	7.063E-7	1.0323E-6	8.041E-7	1.0263E-6	4.535E-7		1969.15075	0.00112	0.00166	1.09E-4	1898.75049	1.62E-4	0.00106
355	0.0708	0.0724	-0.60342	0.59238	0.7596		1331.73	0.07842	0.09924	3665.39764	267230	3665.39764	313899		3665.39764	0.01419	0.01412	0.01381	0.01375	0.01351	0.01357	0.01317	0.01322	0.01306	0.01317	0.01235	0.01219	2318.23623	8.137E-7	3.737E-7	8.96E-7	9.49E-8	1.2645E-6	6.648E-7	9.035E-7	2.705E-7	8.23E-7	4.812E-7	9.657E-7	3.924E-7		1968.18642	6.8E-4	9.93E-4	1.12E-4	1897.78618	2.92E-4	0.00157
354	0.0708	0.0724	-0.60098	0.63836	0.79011		1332.7	0.07841	0.09919	3664.43332	250765	3664.43332	312679		3664.43332	0.01545	0.01538	0.01506	0.015	0.01476	0.01481	0.0144	0.01445	0.01428	0.0144	0.01356	0.01341	2317.27191	7.269E-7	4.402E-7	7.037E-7	1.704E-7	8.851E-7	6.383E-7	4.419E-7	1.533E-7	5.994E-7	4.851E-7	7.179E-7	3.019E-7		1967.2221	2.94E-4	4.15E-4	1.05E-4	1896.82186	5.5E-4	0.00253
353	0.071	0.0726	-0.59854	0.63376	0.72532		1333.66	0.07844	0.09922	3663.46899	236309	3663.46899	302225		3663.46899	0.01674	0.01666	0.01634	0.01628	0.01605	0.01607	0.01568	0.0157	0.01553	0.01566	0.01481	0.01465	2316.30759	5.626E-7	6.344E-7	7.157E-7	6.094E-7	4.015E-7	7.32E-7	2.182E-7	3.136E-7	5.171E-7	7.046E-7	4.47E-7	2.409E-7		1966.25777	7.9E-5	1.14E-4	9.6E-5	1895.85754	0.00107	0.00439
352	0.0706	0.0725	-0.5961	0.67515	0.80558		1334.63	0.07851	0.09931	3662.50467	219842	3662.50467	289196		3662.50467	0.01809	0.01797	0.01766	0.01759	0.01736	0.01736	0.01698	0.01699	0.01682	0.01695	0.0161	0.01593	2315.34326	5.733E-7	9.105E-7	9.855E-7	9.997E-7	1.984E-7	6.624E-7	4.702E-7	5.009E-7	6.86E-7	8.71E-7	4.108E-7	4.092E-7		1965.29345	-6.2E-5	-3.8E-5	8.6E-5	1894.89322	0.00209	0.00792
351	0.0707	0.0728	-0.59366	0.73117	0.87456		1335.59	0.07859	0.09941	3661.54034	201171	3661.54034	277967		3661.54034	0.01946	0.01932	0.019	0.01893	0.01869	0.01869	0.0183	0.01832	0.01813	0.01827	0.01742	0.01724	2314.37894	7.04E-7	1.2877E-6	1.2199E-6	1.2698E-6	3.212E-7	6.593E-7	8.252E-7	6.783E-7	8.94E-7	9.018E-7	5.042E-7	7.098E-7		1964.32912	-2.2E-4	-1.94E-4	8.1E-5	1893.9289	0.0038	0.01386
350	0.0711	0.0732	-0.59121	0.85742	0.94019		1336.55	0.07864	0.09943	3660.57602	183505	3660.57602	267122		3660.57602	0.02086	0.02071	0.02038	0.02031	0.02005	0.02005	0.01965	0.01967	0.01948	0.01962	0.01876	0.01857	2313.41461	7.753E-7	1.6152E-6	1.2321E-6	1.4512E-6	5.415E-7	8.902E-7	9.341E-7	9.572E-7	9.762E-7	9.351E-7	5.458E-7	1.0089E-6		1963.3648	-3.89E-4	-3.71E-4	9.2E-5	1892.96458	0.0061	0.02183
349	0.0713	0.0734	-0.58877	0.88041	0.89922		1337.52	0.07862	0.09935	3659.61169	167534	3659.61169	254597		3659.61169	0.02227	0.02212	0.02178	0.02169	0.02143	0.02145	0.02103	0.02104	0.02087	0.02098	0.02013	0.01993	2312.45029	9.249E-7	1.5636E-6	1.1344E-6	1.4253E-6	8.31E-7	1.0649E-6	9.333E-7	1.1701E-6	1.0082E-6	9.837E-7	6.025E-7	1.3012E-6		1962.40047	-5.03E-4	-5.09E-4	1.12E-4	1892.00027	0.00832	0.02951
348	0.0714	0.0737	-0.58633	0.84948	0.96444		1338.48	0.07854	0.09914	3658.64737	152714	3658.64737	238370		3658.64737	0.02372	0.02358	0.02322	0.02311	0.02285	0.02288	0.02246	0.02245	0.02229	0.02239	0.02153	0.02133	2311.48596	1.2135E-6	1.0925E-6	1.0647E-6	1.2057E-6	1.121E-6	1.0658E-6	1.0203E-6	1.1553E-6	1.039E-6	9.567E-7	7.752E-7	1.5145E-6		1961.43615	-5.24E-4	-5.69E-4	1.26E-4	1891.03595	0.00949	0.03358
347	0.0713	0.0736	-0.58389	0.92013	1.03216		1339.45	0.07839	0.09881	3657.68304	138969	3657.68304	218640		3657.68304	0.02522	0.02507	0.02471	0.0246	0.02432	0.02437	0.02394	0.02393	0.02376	0.02386	0.02299	0.02278	2310.52164	1.3357E-6	6.222E-7	9.034E-7	8.915E-7	1.1772E-6	1.1446E-6	1.0794E-6	1.1128E-6	9.47E-7	9.308E-7	9.441E-7	1.4932E-6		1960.47182	-4.88E-4	-5.6E-4	1.27E-4	1890.07163	0.00907	0.03224
346	0.0719	0.0739	-0.58145	0.92222	1.08149		1340.41	0.07814	0.09833	3656.71872	123417	3656.71872	203580		3656.71872	0.02676	0.02658	0.02624	0.02612	0.02583	0.02588	0.02544	0.02544	0.02526	0.02535	0.02447	0.02428	2309.55731	1.2268E-6	4.326E-7	5.295E-7	5.232E-7	1.0603E-6	1.3099E-6	1.0086E-6	1.1472E-6	6.903E-7	8.171E-7	1.0538E-6	1.2085E-6		1959.5075	-4.34E-4	-5.19E-4	1.17E-4	1889.10731	0.00743	0.02663
345	0.0723	0.0742	-0.57901	0.95399	1.04596		1341.38	0.07783	0.09776	3655.75439	102655	3655.75439	200038		3655.75439	0.02829	0.02811	0.02776	0.02765	0.02735	0.02739	0.02694	0.02694	0.02675	0.02683	0.02595	0.02576	2308.59299	1.1692E-6	4.213E-7	1.787E-7	2.537E-7	1.0394E-6	1.3261E-6	8.993E-7	1.0977E-6	5.43E-7	4.466E-7	1.257E-6	8.944E-7		1958.54318	-3.88E-4	-4.68E-4	1.01E-4	1888.14299	0.00541	0.01959
344	0.0725	0.0744	-0.57657	0.99161	1.0723		1342.34	0.07749	0.09713	3654.79007	77566	3654.79007	198694		3654.79007	0.02983	0.02966	0.02928	0.02917	0.02889	0.0289	0.02845	0.02844	0.02824	0.02833	0.02743	0.02723	2307.62866	1.136E-6	5.285E-7	6.71E-8	3.117E-7	1.0852E-6	1.2493E-6	7.634E-7	9.493E-7	6.544E-7	1.239E-7	1.4373E-6	7.255E-7		1957.57885	-3.58E-4	-4.05E-4	8.8E-5	1887.17867	0.00372	0.01357
343	0.0728	0.0745	-0.57412	0.99872	1.14755		1343.3	0.07712	0.09644	3653.82575	52337	3653.82575	186067		3653.82575	0.03141	0.03124	0.03084	0.03073	0.03044	0.03044	0.02998	0.02998	0.02978	0.02987	0.02897	0.02875	2306.66434	9.039E-7	8.251E-7	1.608E-7	7.208E-7	9.256E-7	1.308E-6	5.822E-7	8.753E-7	7.87E-7	2.331E-7	1.3148E-6	6.362E-7		1956.61453	-3.01E-4	-3.35E-4	8.3E-5	1886.21436	0.00261	0.00952
342	0.0732	0.0749	-0.57168	1.0932	1.17681		1344.27	0.07675	0.09574	3652.86142	30554	3652.86142	164159		3652.86142	0.03304	0.03287	0.03245	0.03233	0.03203	0.03202	0.03157	0.03156	0.03136	0.03146	0.03055	0.03032	2305.70001	6.456E-7	1.2264E-6	5.247E-7	1.246E-6	6.166E-7	1.4196E-6	4.797E-7	9.367E-7	8.291E-7	6.606E-7	1.0091E-6	6.586E-7		1955.6502	-1.97E-4	-2.58E-4	8.8E-5	1885.25004	0.00196	0.00711
341	0.0735	0.0755	-0.56924	1.06603	1.22906		1345.23	0.07637	0.09504	3651.8971	13138	3651.8971	144129		3651.8971	0.03469	0.03453	0.03409	0.03396	0.03366	0.03365	0.0332	0.03318	0.03297	0.03308	0.03216	0.03194	2304.73569	7.101E-7	1.4754E-6	1.1336E-6	1.5778E-6	5.407E-7	1.3133E-6	5.934E-7	1.0648E-6	9.461E-7	1.0923E-6	8.212E-7	8.613E-7		1954.68588	-1E-4	-1.52E-4	9.8E-5	1884.28572	0.00155	0.00563
340	0.074	0.076	-0.5668	1.15005	1.26293		1346.2	0.076	0.09435	3650.93277	-155	3650.93277	130746		3650.93277	0.03637	0.0362	0.03577	0.03563	0.03533	0.0353	0.03486	0.03483	0.03461	0.03473	0.0338	0.03359	2303.77137	1.0193E-6	1.4831E-6	1.6548E-6	1.5557E-6	7.698E-7	1.0318E-6	8.581E-7	1.1683E-6	1.1777E-6	1.3772E-6	7.582E-7	1.1259E-6		1953.72155	-1.7E-5	-8E-6	1.11E-4	1883.3214	0.00125	0.00458
339	0.0745	0.0765	-0.56436	1.1279	1.28048		1347.16	0.07563	0.09368	3649.96845	-8754	3649.96845	121988		3649.96845	0.03807	0.03788	0.03747	0.03731	0.03701	0.03697	0.03652	0.03651	0.03628	0.03639	0.03545	0.03524	2302.80704	1.1967E-6	1.4441E-6	1.8736E-6	1.3507E-6	9.905E-7	8.915E-7	1.0349E-6	1.206E-6	1.3142E-6	1.586E-6	6.974E-7	1.3668E-6		1952.75723	9E-5	1.55E-4	1.15E-4	1882.35708	0.00102	0.00375
338	0.075	0.0772	-0.56192	1.14044	1.38374		1348.13	0.07528	0.09305	3649.00412	-14918	3649.00412	114023		3649.00412	0.03978	0.03958	0.03916	0.03901	0.03869	0.03864	0.03819	0.03819	0.03795	0.03804	0.0371	0.03688	2301.84272	1.1272E-6	1.4433E-6	1.8284E-6	1.2333E-6	1.0619E-6	9.522E-7	1.0421E-6	1.1948E-6	1.216E-6	1.8264E-6	6.853E-7	1.5805E-6		1951.7929	2.27E-4	3.35E-4	1.02E-4	1881.39276	8.23E-4	0.00301
337	0.0757	0.0773	-0.55948	1.24871	1.3365		1349.09	0.07494	0.09246	3648.0398	-23639	3648.0398	105277		3648.0398	0.04148	0.04129	0.04086	0.0407	0.04037	0.04033	0.03987	0.03985	0.03961	0.03971	0.03875	0.03853	2300.87839	1.0649E-6	1.3141E-6	1.6965E-6	1.2059E-6	1.2042E-6	9.755E-7	1.1253E-6	1.1497E-6	1.05E-6	1.9463E-6	8.334E-7	1.6863E-6		1950.82858	4.44E-4	6.39E-4	7.7E-5	1880.42845	6.3E-4	0.00233
336	0.0763	0.0782	-0.55703	1.26962	1.36159		1350.05	0.0746	0.09188	3647.07547	-35648	3647.07547	96317		3647.07547	0.0432	0.04301	0.04256	0.0424	0.04207	0.04203	0.04156	0.04152	0.04128	0.04139	0.04041	0.04018	2299.91407	1.1257E-6	1.0308E-6	1.5872E-6	1.1011E-6	1.4768E-6	8.867E-7	1.4571E-6	1.1019E-6	1.0047E-6	1.7498E-6	1.062E-6	1.587E-6		1949.86425	9.64E-4	0.00133	5.5E-5	1879.46413	4.49E-4	0.00172
335	0.0769	0.0791	-0.55459	1.27129	1.36744		1351.02	0.07427	0.09133	3646.11115	-47123	3646.11115	87300		3646.11115	0.04494	0.04474	0.04428	0.04411	0.04377	0.04375	0.04327	0.04322	0.04298	0.04309	0.0421	0.04184	2298.94974	1.1443E-6	8.468E-7	1.37E-6	9.187E-7	1.636E-6	8.041E-7	1.7992E-6	1.1176E-6	1.047E-6	1.3019E-6	1.2127E-6	1.2713E-6		1948.89993	0.00196	0.00264	3.8E-5	1878.49981	2.97E-4	0.00123
334	0.0776	0.0798	-0.55215	1.26376	1.40757		1351.98	0.07396	0.09083	3645.14682	-56785	3645.14682	80404		3645.14682	0.04671	0.04649	0.04603	0.04585	0.04551	0.04548	0.04499	0.04494	0.04471	0.0448	0.04382	0.04354	2297.98542	1.1054E-6	8.39E-7	1.0363E-6	8.69E-7	1.6145E-6	7.205E-7	1.8638E-6	1.1473E-6	1.0661E-6	7.204E-7	1.2697E-6	8.662E-7		1947.9356	0.00306	0.00416	3.1E-5	1877.53549	1.72E-4	8.5336E-4
333	0.0783	0.0804	-0.54971	1.3294	1.43433		1352.95	0.07367	0.09035	3644.1825	-66051	3644.1825	77146		3644.1825	0.0485	0.04827	0.0478	0.04762	0.04727	0.04725	0.04674	0.0467	0.04646	0.04655	0.04556	0.04528	2297.02109	1.1099E-6	7.757E-7	8.26E-7	9.686E-7	1.5643E-6	5.602E-7	1.6648E-6	1.039E-6	1.0751E-6	1.933E-7	1.2627E-6	5.801E-7		1946.97128	0.00344	0.0048	4.6E-5	1876.57117	7.9E-5	5.92472E-4
332	0.0791	0.081	-0.54727	1.41593	1.5263		1353.91	0.07339	0.0899	3643.21818	-74668	3643.21817	70772		3643.21818	0.05031	0.05006	0.04959	0.04941	0.04904	0.04903	0.04851	0.04847	0.04821	0.04831	0.04731	0.04703	2296.05677	1.0706E-6	6.283E-7	7.74E-7	1.0369E-6	1.4536E-6	4.227E-7	1.2883E-6	8.742E-7	1.089E-6	2.32E-8	1.1402E-6	4.671E-7		1946.00696	0.00274	0.00395	7.5E-5	1875.60686	2.1E-5	4.46484E-4
331	0.0798	0.0818	-0.54483	1.43224	1.50832		1354.88	0.07314	0.08949	3642.25385	-83577	3642.25385	56475		3642.25385	0.05212	0.05186	0.05138	0.05121	0.05082	0.05082	0.05029	0.05025	0.04997	0.05009	0.04905	0.04879	2295.09244	9.068E-7	6.194E-7	6.77E-7	1.0848E-6	1.1044E-6	4.706E-7	7.841E-7	9.059E-7	9.681E-7	2.262E-7	8.39E-7	3.633E-7		1945.04263	0.00155	0.00234	1.07E-4	1874.64254	-1.7E-5	3.68815E-4
330	0.0804	0.0826	-0.54239	1.39545	1.51417		1355.84	0.07291	0.08913	3641.28953	-95967	3641.28953	42438		3641.28953	0.05395	0.05368	0.05318	0.05301	0.05262	0.0526	0.05208	0.05203	0.05175	0.05188	0.05083	0.05055	2294.12812	8.279E-7	6.998E-7	5.309E-7	1.0913E-6	6.636E-7	6.299E-7	3.406E-7	1.0377E-6	7.417E-7	4.559E-7	5.128E-7	2.193E-7		1944.07831	6.3E-4	9.93E-4	1.3E-4	1873.67822	-4.5E-5	2.84816E-4
329	0.0811	0.0833	-0.53994	1.3967	1.70522		1356.8	0.07269	0.08881	3640.3252	-111512	3640.3252	36338		3640.3252	0.05578	0.05551	0.05501	0.05482	0.05444	0.0544	0.05388	0.05383	0.05357	0.05367	0.05263	0.05234	2293.1638	1.0689E-6	6.596E-7	4.733E-7	9.035E-7	4.558E-7	7.623E-7	1.925E-7	9.828E-7	7.243E-7	5.27E-7	4.835E-7	2.076E-7		1943.11398	1.66E-4	2.27E-4	1.34E-4	1872.7139	-6.2E-5	1.9421E-4
328	0.0818	0.0839	-0.5375	1.436	1.65673		1357.77	0.07251	0.08855	3639.36088	-125115	3639.36088	34190		3639.36088	0.05764	0.05736	0.05685	0.05665	0.05629	0.05623	0.05569	0.05566	0.05539	0.05549	0.05445	0.05415	2292.19947	1.3765E-6	6.889E-7	4.001E-7	7.096E-7	3.997E-7	1.012E-6	3.164E-7	8.219E-7	9.164E-7	6.647E-7	7.008E-7	4.252E-7		1942.14966	-4E-5	-1.98E-4	1.23E-4	1871.74958	-6.6E-5	1.45273E-4
327	0.0825	0.0847	-0.53506	1.53549	1.60155		1358.73	0.07236	0.08833	3638.39655	-131074	3638.39655	30052		3638.39655	0.0595	0.05921	0.05871	0.0585	0.05813	0.05807	0.05752	0.0575	0.05722	0.05732	0.05626	0.05597	2291.23515	1.3132E-6	9.982E-7	2.448E-7	7.682E-7	2.684E-7	1.3627E-6	5.006E-7	7.278E-7	9.39E-7	1.0307E-6	8.775E-7	7.772E-7		1941.18533	-1.58E-4	-5.54E-4	1.09E-4	1870.78526	-6.4E-5	1.22399E-4
326	0.083	0.0854	-0.53262	1.49912	1.65088		1359.7	0.07222	0.08816	3637.43223	-129252	3637.43223	24904		3637.43223	0.06137	0.06107	0.06058	0.06036	0.05997	0.05993	0.05937	0.05935	0.05906	0.05916	0.05809	0.05779	2290.27082	1.0085E-6	1.2196E-6	2.945E-7	8.256E-7	2.797E-7	1.3803E-6	7.416E-7	5.553E-7	8.354E-7	1.3404E-6	1.0541E-6	1.1342E-6		1940.22101	-2.44E-4	-9.04E-4	1.03E-4	1869.82095	-5.4E-5	8.68017E-5
325	0.0837	0.0859	-0.53018	1.57605	1.66049		1360.66	0.07212	0.08804	3636.4679	-125368	3636.4679	23054		3636.4679	0.06324	0.06295	0.06246	0.06223	0.06182	0.06179	0.06122	0.06119	0.06091	0.061	0.05992	0.05961	2289.3065	8.46E-7	1.0786E-6	6.789E-7	6.019E-7	6.524E-7	9.928E-7	1.1181E-6	2.988E-7	9.225E-7	1.3508E-6	1.2633E-6	1.3585E-6		1939.25668	-2.86E-4	-0.00112	1.05E-4	1868.85663	-2.4E-5	3.41933E-5
324	0.0843	0.0865	-0.52774	1.57019	1.77629		1361.63	0.07205	0.08797	3635.50358	-122169	3635.50358	21109		3635.50358	0.06512	0.06483	0.06432	0.0641	0.06368	0.06364	0.06308	0.06302	0.06277	0.06287	0.06176	0.06145	2288.34217	6.744E-7	8.811E-7	1.0215E-6	2.922E-7	9.701E-7	6.414E-7	1.3303E-6	2.501E-7	9.925E-7	1.2601E-6	1.1819E-6	1.2946E-6		1938.29236	-2.56E-4	-0.00109	1.06E-4	1867.89231	1.4E-5	4.3617E-6
323	0.0848	0.0873	-0.5253	1.55974	1.77713		1362.59	0.07203	0.08797	3634.53925	-117619	3634.53925	9385		3634.53925	0.06701	0.06671	0.06618	0.06597	0.06556	0.06551	0.06495	0.06487	0.06462	0.06473	0.06362	0.06328	2287.37785	2.623E-7	8.15E-7	1.0952E-6	1.296E-7	9.172E-7	4.588E-7	1.1348E-6	4.084E-7	8.372E-7	1.2269E-6	7.869E-7	1.0126E-6		1937.32803	-1.57E-4	-8.53E-4	9.9E-5	1866.92799	4.4E-5	5.0443E-5
322	0.0852	0.088	-0.52285	1.64502	1.82437		1363.55	0.07205	0.08806	3633.57493	-111900	3633.57493	-11129		3633.57493	0.0689	0.0686	0.06805	0.06784	0.06745	0.06739	0.06682	0.06675	0.06648	0.06657	0.06547	0.06512	2286.41352	-5.71E-8	6.348E-7	1.1792E-6	1.039E-7	8.374E-7	2.028E-7	8.07E-7	4.811E-7	6.945E-7	1.0614E-6	5.291E-7	7.769E-7		1936.36371	-4.9E-5	-5.76E-4	9.7E-5	1865.96367	7.2E-5	1.63909E-4
321	0.0858	0.0885	-0.52041	1.64586	1.76542		1364.52	0.07214	0.08826	3632.61061	-106821	3632.6106	-28439		3632.61061	0.0708	0.07048	0.06992	0.06971	0.06934	0.06926	0.0687	0.06863	0.06834	0.0684	0.06732	0.06696	2285.4492	-6.4E-8	2.803E-7	1.3303E-6	2.189E-7	9.026E-7	-1.62E-8	5.581E-7	5.143E-7	6.182E-7	7.579E-7	5.207E-7	6.196E-7		1935.39939	-2E-6	-3.65E-4	1.09E-4	1864.99935	1.01E-4	3.00225E-4
320	0.0864	0.0892	-0.51797	1.6467	1.82019		1365.48	0.07234	0.0886	3631.64628	-102302	3631.64628	-37684		3631.64628	0.0727	0.07236	0.07181	0.07161	0.07122	0.07112	0.07057	0.07051	0.07021	0.07026	0.06917	0.06883	2284.48487	-2.34E-8	7.59E-8	1.2191E-6	4.635E-7	8.255E-7	1.15E-7	2.623E-7	6.986E-7	4.274E-7	5.584E-7	4.301E-7	4.002E-7		1934.43506	-2.3E-5	-2.36E-4	1.23E-4	1864.03504	1.21E-4	4.29953E-4
319	0.0871	0.0899	-0.51553	1.68474	1.83398		1366.45	0.07263	0.08911	3630.68196	-98239	3630.68196	-41027		3630.68196	0.0746	0.07427	0.07372	0.07351	0.07311	0.073	0.07246	0.07239	0.0721	0.07217	0.07106	0.07073	2283.52055	6.75E-8	1.109E-7	8.492E-7	6.321E-7	6.14E-7	4.416E-7	-1.25E-8	7.649E-7	2.172E-7	3.771E-7	2.174E-7	2.018E-7		1933.47074	-6.9E-5	-1.7E-4	1.21E-4	1863.07072	1.32E-4	5.30147E-4
318	0.0878	0.0905	-0.51309	1.69561	1.84861		1367.41	0.07302	0.08977	3629.71763	-96063	3629.71763	-38389		3629.71763	0.0765	0.0762	0.07565	0.07541	0.07501	0.07491	0.07437	0.07429	0.074	0.0741	0.07296	0.07265	2282.55623	4.648E-7	1.712E-7	5.44E-7	6.568E-7	5.331E-7	6.863E-7	-2.89E-8	5.057E-7	2.348E-7	6.21E-8	2.359E-7	1.935E-7		1932.50641	-1.02E-4	-1.45E-4	1.04E-4	1862.1064	1.31E-4	6.02509E-4
317	0.0881	0.091	-0.51065	1.76877	1.84778		1368.38	0.07346	0.09052	3628.75331	-96347	3628.75331	-34115		3628.75331	0.07839	0.07811	0.07755	0.0773	0.07689	0.0768	0.07626	0.07617	0.07587	0.07598	0.07484	0.07451	2281.5919	9.27E-7	2.644E-7	3.602E-7	7.359E-7	4.758E-7	9.192E-7	1.701E-7	2.909E-7	3.707E-7	-1.335E-7	5.269E-7	2.896E-7		1931.54209	-1.18E-4	-1.37E-4	9.1E-5	1861.14208	1.17E-4	6.64635E-4
316	0.0887	0.0915	-0.50821	1.82228	1.99493		1369.34	0.07392	0.09126	3627.78898	-97122	3627.78898	-35171		3627.78898	0.08027	0.07999	0.07942	0.07917	0.07876	0.07866	0.07811	0.07802	0.07772	0.07783	0.07667	0.07634	2280.62758	1.0102E-6	4.846E-7	2.028E-7	9.21E-7	2.901E-7	1.1524E-6	4.36E-7	3.592E-7	3.301E-7	-6.03E-8	7.108E-7	4.153E-7		1930.57776	-1.18E-4	-1.3E-4	8.7E-5	1860.17776	9.2E-5	6.98823E-4
315	0.0892	0.0923	-0.50577	1.80639	1.88875		1370.31	0.07436	0.09195	3626.82466	-97255	3626.82466	-36183		3626.82466	0.08217	0.08186	0.08128	0.08104	0.08063	0.08052	0.07995	0.07987	0.07957	0.07967	0.0785	0.07816	2279.66325	7.989E-7	6.16E-7	2.108E-7	9.74E-7	1.72E-7	1.0575E-6	8.007E-7	4.266E-7	1.855E-7	-5.7E-9	6.771E-7	6.933E-7		1929.61344	-1.08E-4	-1.34E-4	8.6E-5	1859.21344	6.3E-5	6.90375E-4
314	0.0896	0.0927	-0.50332	1.92177	1.99827		1371.27	0.07479	0.09259	3625.86033	-98247	3625.86033	-27305		3625.86033	0.08408	0.08374	0.08316	0.08291	0.08251	0.0824	0.08181	0.08174	0.08145	0.08153	0.08034	0.07998	2278.69893	6.036E-7	5.263E-7	4.14E-7	7.592E-7	2.133E-7	5.965E-7	1.1502E-6	3.716E-7	2.43E-7	-1.019E-7	5.888E-7	9.972E-7		1928.64911	-1.01E-4	-1.61E-4	8.1E-5	1858.24913	3.6E-5	6.6879E-4
313	0.0899	0.0931	-0.50088	1.88875	2.04426		1372.23	0.07521	0.09322	3624.89601	-100315	3624.89601	-14697		3624.89601	0.08598	0.08563	0.08504	0.08478	0.08439	0.08429	0.08369	0.08361	0.08332	0.08339	0.08217	0.08182	2277.7346	3.988E-7	4.43E-7	4.835E-7	4.528E-7	2.352E-7	2.152E-7	1.0593E-6	4.045E-7	4.449E-7	-9.08E-8	4.08E-7	1.0012E-6		1927.68479	-1.24E-4	-2.02E-4	7.8E-5	1857.28481	1.1E-5	6.54452E-4
312	0.0902	0.0937	-0.49844	1.94978	2.10739		1373.2	0.07562	0.09385	3623.93168	-100050	3623.93168	-13686		3623.93168	0.08788	0.08754	0.08693	0.08666	0.08625	0.08616	0.08556	0.08547	0.08519	0.08526	0.08401	0.08367	2276.77028	9.73E-8	4.163E-7	3.492E-7	1.73E-7	2.203E-7	2.5E-8	4.749E-7	4.5E-7	5.682E-7	1.074E-7	1.966E-7	8.059E-7		1926.72046	-1.88E-4	-2.21E-4	8.4E-5	1856.32049	-1.2E-5	6.35109E-4
311	0.0906	0.094	-0.496	2.00329	2.16675		1374.16	0.07605	0.09453	3622.96736	-95472	3622.96736	-24546		3622.96736	0.08978	0.08944	0.08883	0.08855	0.08812	0.08803	0.08744	0.08734	0.08706	0.08714	0.08588	0.08554	2275.80595	-9.57E-8	3.253E-7	3.073E-7	-6.82E-8	3.435E-7	-1.589E-7	-4.24E-8	3.301E-7	7.179E-7	3.455E-7	2.636E-7	7.023E-7		1925.75614	-2.56E-4	-2.32E-4	9.4E-5	1855.35617	-3.4E-5	5.9504E-4
310	0.091	0.0944	-0.49356	1.96901	2.12912		1375.13	0.07654	0.09529	3622.00304	-90526	3622.00303	-33324		3622.00304	0.09168	0.09134	0.09073	0.09045	0.09001	0.08992	0.08933	0.08923	0.08895	0.08903	0.08777	0.08741	2274.84163	8.3E-9	3.18E-7	3.088E-7	-9.36E-8	5.163E-7	-1.872E-7	-1.975E-7	2.841E-7	8.713E-7	6.523E-7	4.922E-7	5.527E-7		1924.79182	-2.97E-4	-2.88E-4	1.01E-4	1854.39185	-5.9E-5	5.33052E-4
309	0.0912	0.0947	-0.49112	2.02252	2.11491		1376.09	0.07705	0.09614	3621.03871	-87437	3621.03871	-33864		3621.03871	0.09359	0.09325	0.09264	0.09237	0.09193	0.09182	0.09125	0.09113	0.09085	0.09091	0.08967	0.0893	2273.8773	3.359E-7	4.497E-7	9.78E-8	7.56E-8	5.708E-7	3.27E-8	-1.615E-7	4.653E-7	8.335E-7	1.0388E-6	4.837E-7	2.202E-7		1923.82749	-3.22E-4	-3.78E-4	1.09E-4	1853.42753	-8.2E-5	4.60845E-4
308	0.0914	0.0951	-0.48868	2.0267	2.14794		1377.06	0.0776	0.09705	3620.07439	-82019	3620.07439	-29849		3620.07439	0.09549	0.09515	0.09454	0.09428	0.09385	0.09373	0.09315	0.09303	0.09275	0.09279	0.09157	0.09121	2272.91298	7.808E-7	5.234E-7	-1.035E-7	1.053E-7	6.519E-7	1.822E-7	5.99E-8	5.445E-7	7.955E-7	1.2624E-6	3.639E-7	1.22E-8		1922.86317	-3.34E-4	-4.26E-4	1.22E-4	1852.46322	-9.2E-5	3.82642E-4
307	0.0916	0.0955	-0.48623	2.09944	2.16967		1378.02	0.07819	0.09801	3619.11006	-71763	3619.11006	-23933		3619.11006	0.09738	0.09703	0.09643	0.09616	0.09572	0.09562	0.09504	0.09491	0.09463	0.09467	0.09345	0.09308	2271.94866	1.1642E-6	5.415E-7	-2.09E-8	9.1E-9	8.095E-7	1.597E-7	4.329E-7	4.112E-7	8.255E-7	1.1761E-6	3.93E-7	1.99E-8		1921.89884	-3.29E-4	-4.14E-4	1.4E-4	1851.4989	-9.3E-5	2.99299E-4
306	0.0918	0.096	-0.48379	2.11073	2.22653		1378.98	0.07881	0.09901	3618.14574	-58923	3618.14574	-20647		3618.14574	0.09927	0.09891	0.09832	0.09803	0.09757	0.0975	0.09691	0.09677	0.0965	0.09654	0.09531	0.09492	2270.98433	1.1683E-6	6.627E-7	1.114E-7	1.432E-7	8.12E-7	2.967E-7	6.241E-7	4.502E-7	5.507E-7	9.499E-7	4.322E-7	-6.93E-8		1920.93452	-3.17E-4	-3.95E-4	1.56E-4	1850.53458	-1.07E-4	2.15284E-4
305	0.0922	0.0963	-0.48135	2.16717	2.26499		1379.95	0.07947	0.10011	3617.18141	-48113	3617.18141	-25225		3617.18141	0.10116	0.1008	0.10021	0.09991	0.09944	0.09938	0.09876	0.09864	0.09836	0.09841	0.09715	0.09676	2270.02001	7.828E-7	7.178E-7	1.508E-7	3.72E-7	5.995E-7	5.521E-7	6.099E-7	6.612E-7	-7.34E-8	6.24E-7	3.664E-7	-2.496E-7		1919.97019	-3.06E-4	-3.9E-4	1.51E-4	1849.57026	-1.37E-4	1.48864E-4
304	0.0926	0.0966	-0.47891	2.20354	2.30136		1380.91	0.08021	0.10135	3616.21709	-42555	3616.21709	-31558		3616.21709	0.10303	0.10268	0.10208	0.10179	0.10132	0.10125	0.10062	0.1005	0.10021	0.10028	0.09898	0.0986	2269.05568	3.877E-7	4.494E-7	3.521E-7	3.541E-7	3.953E-7	5.477E-7	7.597E-7	6.654E-7	-5.424E-7	8.78E-8	2.826E-7	-2.028E-7		1919.00587	-2.96E-4	-3.84E-4	1.22E-4	1848.60594	-1.65E-4	1.17193E-4
303	0.0929	0.097	-0.47647	2.22695	2.34066		1381.88	0.08102	0.1027	3615.25276	-39877	3615.25276	-28166		3615.25276	0.10492	0.10456	0.10393	0.10367	0.1032	0.10311	0.10249	0.10237	0.10208	0.10214	0.10083	0.10045	2268.09136	9.45E-8	3.75E-8	6.302E-7	2.65E-7	2.358E-7	3.121E-7	9.79E-7	4.831E-7	-5.85E-7	-4.478E-7	1.287E-7	-4.91E-8		1918.04154	-3.05E-4	-3.91E-4	9.6E-5	1847.64163	-1.84E-4	9.89223E-5
302	0.0933	0.0974	-0.47403	2.2374	2.42594		1382.84	0.08186	0.10413	3614.28844	-37106	3614.28844	-16994		3614.28844	0.10683	0.10645	0.10581	0.10554	0.10509	0.10499	0.10437	0.10426	0.10396	0.10402	0.10271	0.10232	2267.12703	-2.785E-7	-2.096E-7	6.668E-7	2.965E-7	-4.28E-8	1.502E-7	8.242E-7	2.563E-7	-3.751E-7	-7.034E-7	-9.9E-8	-1.129E-7		1917.07722	-3.4E-4	-4.15E-4	9.9E-5	1846.67731	-1.95E-4	7.56591E-5
301	0.0937	0.0979	-0.47159	2.28004	2.42887		1383.81	0.08271	0.10558	3613.32411	-35224	3613.32411	-10759		3613.32411	0.10873	0.10834	0.1077	0.10742	0.10698	0.10686	0.10625	0.10615	0.10584	0.10591	0.10459	0.10418	2266.16271	-6.078E-7	-2.739E-7	5.584E-7	3.289E-7	-3.212E-7	1.699E-7	3.099E-7	-9.61E-8	-5.74E-8	-6.547E-7	-1.423E-7	-1.784E-7		1916.11289	-3.7E-4	-4.19E-4	1.17E-4	1845.71299	-1.99E-4	6.11888E-5
300	0.0942	0.0984	-0.46914	2.29927	2.44726		1384.77	0.08358	0.10704	3612.35979	-36042	3612.35979	-13031		3612.35979	0.11061	0.11023	0.10958	0.10931	0.10886	0.10874	0.10811	0.10803	0.10771	0.10778	0.10644	0.10604	2265.19838	-6.334E-7	-2.285E-7	4.44E-7	3.481E-7	-3.842E-7	2.72E-7	-2.152E-7	-4.614E-7	2.543E-7	-3.847E-7	5.79E-8	7.77E-8		1915.14857	-3.62E-4	-3.92E-4	1.26E-4	1844.74867	-1.94E-4	5.35033E-5
299	0.0948	0.099	-0.4667	2.39877	2.5593		1385.73	0.08446	0.10851	3611.39547	-38797	3611.39546	-15599		3611.39547	0.1125	0.11212	0.11144	0.1112	0.11074	0.11061	0.10999	0.1099	0.10958	0.10964	0.1083	0.10789	2264.23406	-3.824E-7	-6.91E-8	2.142E-7	4.442E-7	-3.226E-7	3.836E-7	-4.963E-7	-5.825E-7	4.232E-7	-4.3E-8	2.215E-7	4.634E-7		1914.18425	-3.2E-4	-3.58E-4	1.26E-4	1843.78435	-1.86E-4	5.13294E-5
298	0.0956	0.0997	-0.46426	2.4088	2.62577		1386.7	0.08539	0.11004	3610.43114	-39078	3610.43114	-15876		3610.43114	0.1144	0.11403	0.11334	0.1131	0.11263	0.11249	0.11189	0.11179	0.11146	0.11151	0.11018	0.10975	2263.26973	4E-8	1.3E-7	-8.83E-8	5.269E-7	-2.432E-7	4.584E-7	-4.172E-7	-4.717E-7	5.089E-7	2.347E-7	1.865E-7	7.119E-7		1913.21992	-2.71E-4	-3.31E-4	1.15E-4	1842.82003	-1.85E-4	7.39568E-5
297	0.0965	0.1007	-0.46182	2.53839	2.63496		1387.66	0.08641	0.11164	3609.46682	-34186	3609.46682	-17607		3609.46682	0.11629	0.11593	0.11525	0.11499	0.11452	0.11439	0.11378	0.11367	0.11333	0.1134	0.11206	0.11164	2262.30541	5.225E-7	1.665E-7	-2.414E-7	4.355E-7	-7.63E-8	4.129E-7	-7.27E-8	-2.893E-7	6.321E-7	4.176E-7	8.14E-8	8.879E-7		1912.2556	-2.29E-4	-3.06E-4	1.02E-4	1841.85572	-1.86E-4	1.09982E-4
296	0.0977	0.1016	-0.45938	2.58187	2.64207		1388.63	0.08746	0.11329	3608.50249	-27296	3608.50249	-17465		3608.50249	0.11818	0.1178	0.11716	0.11688	0.11639	0.11627	0.11565	0.11553	0.11518	0.11526	0.11391	0.1135	2261.34109	7.974E-7	1.077E-7	-1.766E-7	3.116E-7	1.472E-7	3.66E-7	2.352E-7	4.9E-9	7.191E-7	6.05E-7	8.18E-8	1.0126E-6		1911.29127	-1.95E-4	-2.73E-4	1.02E-4	1840.8914	-1.8E-4	1.23146E-4
295	0.099	0.1029	-0.45694	2.59316	2.75369		1389.59	0.08852	0.11493	3607.53817	-21147	3607.53817	-11948		3607.53817	0.12006	0.11967	0.11904	0.11875	0.11825	0.11814	0.1175	0.11738	0.11703	0.11711	0.11574	0.11532	2260.37676	6.943E-7	2.895E-7	-5.81E-8	3.766E-7	2.849E-7	5.188E-7	2.731E-7	4.85E-7	5.809E-7	8.809E-7	1.158E-7	8.499E-7		1910.32695	-1.68E-4	-2.26E-4	1.08E-4	1839.92708	-1.73E-4	1.16356E-4
294	0.1005	0.1042	-0.4545	2.56808	2.81305		1390.56	0.08959	0.11658	3606.57384	-15034	3606.57384	-5183		3606.57384	0.12194	0.12155	0.12091	0.12062	0.12011	0.12	0.11936	0.11923	0.11889	0.11896	0.11758	0.11715	2259.41244	4.802E-7	7.072E-7	3.53E-8	5.452E-7	4.148E-7	7.411E-7	1.813E-7	9.396E-7	2.955E-7	1.0989E-6	1.713E-7	4.77E-7		1909.36262	-1.57E-4	-1.88E-4	1.12E-4	1838.96276	-1.64E-4	1.18126E-4
293	0.1023	0.1057	-0.45205	2.75787	2.80511		1391.52	0.09069	0.11825	3605.60952	-7601	3605.60952	1934		3605.60952	0.12381	0.12342	0.12278	0.12249	0.12198	0.12187	0.12122	0.1211	0.12076	0.12082	0.11943	0.11899	2258.44811	4.868E-7	1.0129E-6	2.633E-7	6.258E-7	6.834E-7	7.503E-7	3.039E-7	1.0876E-6	2.13E-7	1.0814E-6	4.91E-7	3.168E-7		1908.3983	-1.55E-4	-1.86E-4	1.1E-4	1837.99844	-1.48E-4	1.38661E-4
292	0.1043	0.1073	-0.44961	2.79466	2.94808		1392.48	0.09177	0.11988	3604.64519	2110	3604.64519	12975		3604.64519	0.1257	0.12529	0.12465	0.12434	0.12387	0.12374	0.1231	0.12297	0.12264	0.1227	0.12129	0.12083	2257.48379	5.73E-7	1.1245E-6	6.632E-7	6.407E-7	9.63E-7	6.082E-7	6.265E-7	1.0447E-6	4.614E-7	9.471E-7	9.588E-7	4.08E-7		1907.43397	-1.52E-4	-2.02E-4	1.02E-4	1837.03412	-1.36E-4	1.80901E-4
291	0.1065	0.1087	-0.44717	2.92802	3.01037		1393.45	0.09279	0.12144	3603.68087	13083	3603.68087	25342		3603.68087	0.12759	0.12716	0.12653	0.12619	0.12575	0.12562	0.12498	0.12484	0.12451	0.12456	0.12315	0.12268	2256.51946	4.909E-7	1.2231E-6	9.621E-7	7.043E-7	1.0407E-6	5.951E-7	8.133E-7	1.0785E-6	7.716E-7	9.241E-7	1.1233E-6	4.517E-7		1906.46965	-1.53E-4	-2.06E-4	1.01E-4	1836.06981	-1.28E-4	2.50592E-4
290	0.1085	0.1103	-0.44473	2.96021	3.06555		1394.41	0.09373	0.12289	3602.71654	22246	3602.71654	30627		3602.71654	0.12947	0.12904	0.12841	0.12805	0.12762	0.12748	0.12686	0.1267	0.12637	0.12641	0.12501	0.12454	2255.55514	4.461E-7	1.3434E-6	1.0573E-6	8.316E-7	9.611E-7	8.003E-7	8.409E-7	1.1928E-6	9.301E-7	1.0171E-6	1.0197E-6	4.581E-7		1905.50532	-1.74E-4	-2.13E-4	1.19E-4	1835.10549	-1.09E-4	3.43933E-4
289	0.1097	0.1113	-0.44229	2.99407	3.13955		1395.38	0.09456	0.12416	3601.75222	26974	3601.75222	26164		3601.75222	0.13135	0.13095	0.13029	0.12994	0.12948	0.12935	0.12874	0.12857	0.12823	0.12828	0.12686	0.12641	2254.59081	6.982E-7	1.4444E-6	1.1296E-6	1.014E-6	8.784E-7	1.1142E-6	8.996E-7	1.3515E-6	9.781E-7	1.1489E-6	9.794E-7	6.461E-7		1904.541	-2.32E-4	-2.6E-4	1.4E-4	1834.14117	-7.3E-5	4.49787E-4
288	0.1105	0.1119	-0.43985	3.07559	3.25618		1396.34	0.09524	0.1252	3600.78789	27648	3600.78789	18070		3600.78789	0.13323	0.13285	0.13218	0.13184	0.13136	0.13124	0.13061	0.13045	0.1301	0.13015	0.12871	0.12827	2253.62649	1.0682E-6	1.4668E-6	1.2273E-6	1.2407E-6	8.479E-7	1.3629E-6	9.854E-7	1.5749E-6	9.69E-7	1.2728E-6	9.89E-7	9.753E-7		1903.57668	-3.29E-4	-3.67E-4	1.46E-4	1833.17685	-3.1E-5	5.66875E-4
287	0.111	0.1123	-0.43741	3.08896	3.30301		1397.31	0.09579	0.12603	3599.82357	26822	3599.82357	12436		3599.82357	0.13512	0.13473	0.13407	0.13373	0.13325	0.13312	0.13246	0.13233	0.13197	0.13204	0.13056	0.13011	2252.66216	1.3036E-6	1.3055E-6	1.378E-6	1.4747E-6	9.537E-7	1.465E-6	1.147E-6	1.7271E-6	1.0103E-6	1.3171E-6	9.962E-7	1.2571E-6		1902.61235	-4.68E-4	-5.53E-4	1.38E-4	1832.21253	1E-5	7.10041E-4
286	0.1117	0.113	-0.43496	3.22985	3.38411		1398.27	0.0962	0.12661	3598.85925	24102	3598.85925	9328		3598.85925	0.13701	0.13662	0.13595	0.1356	0.13512	0.13499	0.13432	0.1342	0.13385	0.13393	0.13241	0.13196	2251.69784	1.3786E-6	1.0975E-6	1.6626E-6	1.714E-6	1.2371E-6	1.5197E-6	1.431E-6	1.7159E-6	1.1617E-6	1.3759E-6	1.0953E-6	1.4154E-6		1901.64803	-6.74E-4	-8.37E-4	1.22E-4	1831.24821	5E-5	8.66866E-4
285	0.1129	0.1141	-0.43252	3.27918	3.51537		1399.23	0.09646	0.12693	3597.89492	17542	3597.89492	8238		3597.89492	0.1389	0.13851	0.13783	0.13748	0.13701	0.13688	0.1362	0.13608	0.13574	0.13582	0.13427	0.13383	2250.73352	1.3176E-6	1.1652E-6	1.943E-6	2.0438E-6	1.5095E-6	1.729E-6	1.6165E-6	1.7141E-6	1.2441E-6	1.6495E-6	1.2326E-6	1.4556E-6		1900.6837	-9.17E-4	-0.00115	9.5E-5	1830.2839	8.8E-5	0.00102
284	0.1141	0.1152	-0.43008	3.40208	3.58059		1400.2	0.09655	0.12698	3596.9306	8529	3596.9306	11634		3596.9306	0.1408	0.14041	0.13971	0.13938	0.1389	0.13877	0.13808	0.13796	0.13763	0.13769	0.13614	0.1357	2249.76919	1.2192E-6	1.582E-6	2.0661E-6	2.4328E-6	1.6517E-6	2.0928E-6	1.6259E-6	1.8302E-6	1.2445E-6	2.0672E-6	1.4063E-6	1.405E-6		1899.71938	-0.00107	-0.00131	7.5E-5	1829.31958	1.3E-4	0.00118
283	0.1153	0.1162	-0.42764	3.56763	3.62281		1401.16	0.09647	0.12674	3595.96627	2495	3595.96627	18412		3595.96627	0.14272	0.14232	0.14161	0.1413	0.14079	0.14067	0.13997	0.13985	0.13952	0.13955	0.13802	0.13758	2248.80487	1.289E-6	2.1002E-6	2.1223E-6	2.6043E-6	1.8405E-6	2.307E-6	1.7453E-6	1.9932E-6	1.4483E-6	2.3539E-6	1.772E-6	1.416E-6		1898.75505	-0.00104	-0.00126	9E-5	1828.35526	1.79E-4	0.00137
282	0.1163	0.1171	-0.4252	3.6642	3.7407		1402.13	0.09618	0.12618	3595.00195	4516	3595.00195	23814		3595.00195	0.14463	0.14422	0.14352	0.14321	0.14268	0.14256	0.14185	0.14175	0.14142	0.14143	0.1399	0.13946	2247.84054	1.5936E-6	2.4436E-6	2.2015E-6	2.4972E-6	2.2094E-6	2.2642E-6	2.0763E-6	2.2321E-6	1.9171E-6	2.4243E-6	2.298E-6	1.7105E-6		1897.79073	-8.99E-4	-0.0011	1.19E-4	1827.39094	2.28E-4	0.00157
281	0.1168	0.1177	-0.42276	3.71186	3.83518		1403.09	0.09572	0.12535	3594.03762	11097	3594.03762	27294		3594.03762	0.14652	0.14611	0.14541	0.14509	0.14458	0.14443	0.14374	0.14364	0.1433	0.14331	0.14177	0.14134	2246.87622	1.9663E-6	2.5316E-6	2.2325E-6	2.3355E-6	2.6057E-6	2.2561E-6	2.37E-6	2.5385E-6	2.4051E-6	2.372E-6	2.762E-6	2.2005E-6		1896.8264	-8.02E-4	-0.00101	1.29E-4	1826.42662	2.78E-4	0.00176
280	0.1171	0.1179	-0.42032	3.69764	3.94722		1404.06	0.09513	0.12427	3593.0733	16081	3593.0733	29949		3593.0733	0.14841	0.148	0.1473	0.14696	0.14647	0.1463	0.14564	0.14552	0.14517	0.1452	0.14363	0.14321	2245.91189	2.3082E-6	2.4323E-6	2.13E-6	2.1834E-6	2.8195E-6	2.4875E-6	2.5182E-6	2.7925E-6	2.7586E-6	2.2768E-6	2.9929E-6	2.5673E-6		1895.86208	-8.24E-4	-0.00103	1.26E-4	1825.46231	3.28E-4	0.00193
279	0.1174	0.118	-0.41787	3.89162	4.13492		1405.02	0.09442	0.12297	3592.10897	22087	3592.10897	32090		3592.10897	0.15031	0.14991	0.14918	0.14885	0.14836	0.14818	0.14756	0.1474	0.14705	0.1471	0.14551	0.14507	2244.94757	2.7425E-6	2.2192E-6	1.9438E-6	2.0445E-6	2.7909E-6	2.7744E-6	2.6509E-6	2.9143E-6	2.9536E-6	2.2136E-6	2.9474E-6	2.757E-6		1894.89775	-9.03E-4	-0.00111	1.26E-4	1824.49799	3.67E-4	0.00206
278	0.1174	0.1179	-0.41543	3.97732	4.19178		1405.99	0.09362	0.12152	3591.14465	31933	3591.14465	34402		3591.14465	0.15223	0.15183	0.15109	0.15076	0.15025	0.15008	0.14946	0.14929	0.14894	0.149	0.14739	0.14694	2243.98324	3.2473E-6	1.9498E-6	1.8986E-6	2.02E-6	2.6238E-6	2.8093E-6	2.8488E-6	2.8424E-6	2.9989E-6	2.201E-6	2.7649E-6	2.9262E-6		1893.93343	-8.95E-4	-0.00109	1.27E-4	1823.53367	3.98E-4	0.00216
277	0.1171	0.1177	-0.41299	4.1136	4.34896		1406.95	0.09278	0.12002	3590.18032	42773	3590.18032	36077		3590.18032	0.15416	0.15374	0.153	0.15266	0.15216	0.152	0.15136	0.15119	0.15085	0.1509	0.14929	0.14881	2243.01892	3.4586E-6	1.5543E-6	2.1092E-6	1.9566E-6	2.4255E-6	2.4048E-6	3.043E-6	2.4453E-6	2.9387E-6	2.0463E-6	2.6315E-6	3.0473E-6		1892.96911	-7.62E-4	-9.34E-4	1.21E-4	1822.56935	4.21E-4	0.00225
276	0.1168	0.1175	-0.41055	4.23944	4.40582		1407.91	0.09194	0.11852	3589.216	52803	3589.216	36269		3589.216	0.15607	0.15565	0.15492	0.15456	0.15407	0.15393	0.15325	0.1531	0.15276	0.15281	0.1512	0.1507	2242.05459	3.1241E-6	8.176E-7	2.3314E-6	1.5323E-6	2.2439E-6	1.5312E-6	3.0822E-6	1.5723E-6	2.7506E-6	1.5236E-6	2.5659E-6	2.9412E-6		1892.00478	-6.03E-4	-7.3E-4	1.06E-4	1821.60503	4.27E-4	0.00231
275	0.1164	0.1174	-0.40811	4.33182	4.61108		1408.88	0.09112	0.11709	3588.25168	62013	3588.25168	36811		3588.25168	0.15798	0.15757	0.15684	0.15647	0.15597	0.15585	0.15516	0.15502	0.15466	0.15471	0.15311	0.15259	2241.09027	2.3046E-6	-1.329E-7	2.232E-6	7.668E-7	1.9873E-6	4.219E-7	2.7144E-6	3.623E-7	2.2896E-6	7.419E-7	2.3256E-6	2.4495E-6		1891.04046	-4.92E-4	-5.83E-4	9.8E-5	1820.64071	4.16E-4	0.00229
274	0.1159	0.1172	-0.40567	4.39997	4.69344		1409.84	0.09038	0.11578	3587.28735	70379	3587.28735	39523		3587.28735	0.1599	0.15948	0.15876	0.1584	0.15787	0.15774	0.15707	0.15692	0.15656	0.15661	0.15501	0.15449	2240.12595	1.1757E-6	-8.667E-7	1.6865E-6	-8.71E-8	1.3758E-6	-6.307E-7	1.7034E-6	-8.061E-7	1.3965E-6	-4.57E-8	1.6001E-6	1.5271E-6		1890.07613	-4.14E-4	-5.04E-4	1.03E-4	1819.6764	4E-4	0.00221
273	0.1155	0.1169	-0.40323	4.5074	4.78917		1410.81	0.08973	0.11463	3586.32303	77092	3586.32303	43790		3586.32303	0.16182	0.16139	0.16069	0.16032	0.15977	0.15964	0.15898	0.15881	0.15846	0.15849	0.1569	0.15638	2239.16162	1.24E-8	-1.4181E-6	7.638E-7	-1.0058E-6	3.934E-7	-1.6261E-6	2.641E-7	-1.8886E-6	2.018E-7	-9.317E-7	4.543E-7	3.337E-7		1889.11181	-3.61E-4	-4.42E-4	1.06E-4	1818.71208	3.84E-4	0.00209
272	0.1151	0.1165	-0.40078	4.53165	4.90539		1411.77	0.08916	0.11364	3585.3587	80388	3585.3587	45981		3585.3587	0.16374	0.1633	0.1626	0.16223	0.16169	0.16154	0.16088	0.1607	0.16035	0.16038	0.15878	0.15826	2238.1973	-9.598E-7	-2.1713E-6	-3.46E-7	-2.1631E-6	-5.656E-7	-2.6884E-6	-1.0174E-6	-3.0147E-6	-8.792E-7	-2.1269E-6	-7.351E-7	-9.077E-7		1888.14748	-3.19E-4	-3.66E-4	1.03E-4	1817.74776	3.53E-4	0.00194
271	0.1144	0.1161	-0.39834	4.78833	5.02955		1412.74	0.08868	0.11279	3584.39438	79988	3584.39438	41884		3584.39438	0.16568	0.16522	0.16452	0.16416	0.16362	0.16346	0.1628	0.16262	0.16225	0.16229	0.16067	0.16015	2237.23297	-1.8246E-6	-3.1688E-6	-1.4848E-6	-3.4637E-6	-1.3151E-6	-3.713E-6	-1.9536E-6	-3.9874E-6	-1.7151E-6	-3.4698E-6	-1.8072E-6	-2.1118E-6		1887.18316	-2.61E-4	-2.97E-4	1.09E-4	1816.78344	3.04E-4	0.00175
270	0.1136	0.1155	-0.3959	4.81927	5.13657		1413.7	0.08827	0.11209	3583.43005	75418	3583.43005	32664		3583.43005	0.16762	0.16714	0.16645	0.16609	0.16556	0.1654	0.16472	0.16455	0.16417	0.16421	0.16258	0.16206	2236.26865	-2.7108E-6	-4.2569E-6	-2.5778E-6	-4.6451E-6	-2.0465E-6	-4.5872E-6	-2.8626E-6	-4.7667E-6	-2.5596E-6	-4.7393E-6	-2.8681E-6	-3.27E-6		1886.21883	-2.13E-4	-2.52E-4	1.25E-4	1815.81912	2.41E-4	0.0015
269	0.1129	0.115	-0.39346	4.96224	5.26867		1414.66	0.08792	0.11148	3582.46573	65078	3582.46573	24174		3582.46573	0.16958	0.16909	0.16838	0.16803	0.1675	0.16733	0.16664	0.16649	0.16611	0.16613	0.1645	0.16398	2235.30432	-3.4866E-6	-5.4071E-6	-3.5468E-6	-5.7645E-6	-2.9254E-6	-5.4698E-6	-3.8359E-6	-5.7212E-6	-3.4874E-6	-5.9962E-6	-3.8889E-6	-4.2992E-6		1885.25451	-2E-4	-2.22E-4	1.3E-4	1814.8548	1.63E-4	0.00126
268	0.1121	0.1144	-0.39102	5.04752	5.38656		1415.63	0.0876	0.11096	3581.5014	51349	3581.5014	20373		3581.5014	0.17154	0.17103	0.17031	0.16996	0.16943	0.16925	0.16857	0.16842	0.16804	0.16806	0.16643	0.16589	2234.34	-4.1143E-6	-6.4469E-6	-4.4785E-6	-6.7771E-6	-4.0733E-6	-6.34E-6	-4.7609E-6	-6.7765E-6	-4.4062E-6	-7.1036E-6	-4.8067E-6	-5.1298E-6		1884.29018	-1.97E-4	-2.06E-4	1.22E-4	1813.89049	7.5E-5	0.00106
267	0.1112	0.1137	-0.38858	5.09142	5.52201		1416.59	0.08727	0.11051	3580.53708	41223	3580.53708	22087		3580.53708	0.17348	0.17297	0.17224	0.17188	0.17136	0.17119	0.17051	0.17034	0.16996	0.17	0.16835	0.1678	2233.37567	-4.8613E-6	-7.0586E-6	-5.5329E-6	-7.3221E-6	-5.5614E-6	-6.9605E-6	-5.7446E-6	-7.4128E-6	-5.4479E-6	-7.6946E-6	-5.8141E-6	-5.8658E-6		1883.32586	-1.82E-4	-2E-4	1.11E-4	1812.92617	-1.8E-5	8.36918E-4
266	0.1099	0.113	-0.38614	5.25446	5.62025		1417.56	0.08696	0.1101	3579.57275	38014	3579.57275	26620		3579.57275	0.17541	0.17493	0.1742	0.17382	0.17332	0.17313	0.17245	0.17227	0.1719	0.17195	0.17027	0.16973	2232.41135	-5.7981E-6	-7.2859E-6	-6.4826E-6	-7.5262E-6	-6.972E-6	-7.4351E-6	-6.6293E-6	-7.5899E-6	-6.5541E-6	-7.8372E-6	-6.8247E-6	-6.4769E-6		1882.36154	-1.59E-4	-1.82E-4	9.9E-5	1811.96185	-1.21E-4	5.71929E-4
265	0.1088	0.1124	-0.38369	5.3272	5.73563		1418.52	0.08667	0.10971	3578.60843	37596	3578.60843	30810		3578.60843	0.17736	0.17689	0.17618	0.17578	0.17528	0.17509	0.17438	0.17423	0.17385	0.17389	0.17219	0.17167	2231.44702	-6.7215E-6	-7.3603E-6	-7.0296E-6	-7.7688E-6	-7.7484E-6	-7.8536E-6	-7.0829E-6	-7.5379E-6	-7.2999E-6	-7.8473E-6	-7.3671E-6	-6.7782E-6		1881.39721	-1.47E-4	-1.65E-4	9.6E-5	1810.99753	-2.31E-4	2.88422E-4
264	0.1076	0.1117	-0.38125	5.40454	5.82802		1419.49	0.08638	0.10927	3577.64411	36120	3577.64411	37565		3577.64411	0.17932	0.17884	0.17814	0.17776	0.17724	0.17705	0.17634	0.17619	0.1758	0.17583	0.17411	0.17361	2230.4827	-7.5623E-6	-7.0975E-6	-7.413E-6	-7.7711E-6	-8.0535E-6	-7.7654E-6	-7.3889E-6	-7.086E-6	-7.6676E-6	-7.5489E-6	-7.509E-6	-6.9417E-6		1880.43289	-1.52E-4	-1.61E-4	9.7E-5	1810.03321	-3.69E-4	-7.53724E-5
263	0.1064	0.1111	-0.37881	5.62569	5.94424		1420.45	0.08603	0.10869	3576.67978	35637	3576.67978	49612		3576.67978	0.18128	0.18081	0.1801	0.17973	0.17918	0.17901	0.17832	0.17815	0.17775	0.17777	0.17605	0.17554	2229.51837	-8.2228E-6	-6.1665E-6	-7.8484E-6	-7.0451E-6	-8.261E-6	-6.785E-6	-7.9071E-6	-6.0128E-6	-7.9126E-6	-6.5078E-6	-7.7122E-6	-7.1456E-6		1879.46856	-1.49E-4	-1.49E-4	8.5E-5	1809.06889	-5.76E-4	-6.69104E-4
262	0.1052	0.1105	-0.37637	5.67167	6.03537		1421.41	0.08556	0.10785	3575.71546	38958	3575.71546	62005		3575.71546	0.18324	0.18279	0.18206	0.1817	0.18113	0.18097	0.18029	0.18009	0.1797	0.17972	0.178	0.17746	2228.55405	-8.2816E-6	-4.7751E-6	-7.8759E-6	-5.6828E-6	-8.0474E-6	-5.2613E-6	-8.1545E-6	-4.6238E-6	-7.7826E-6	-4.8956E-6	-7.726E-6	-7.0028E-6		1878.50424	-1.33E-4	-1.34E-4	7.6E-5	1808.10458	-8.75E-4	-0.00165
261	0.1042	0.1101	-0.37393	5.68087	6.06715		1422.38	0.08495	0.10675	3574.75113	44815	3574.75113	67803		3574.75113	0.18522	0.18477	0.18401	0.18365	0.1831	0.18293	0.18224	0.18203	0.18166	0.18168	0.17996	0.17938	2227.58973	-7.4281E-6	-3.2182E-6	-7.0219E-6	-3.9431E-6	-7.0087E-6	-3.6217E-6	-7.3929E-6	-3.2249E-6	-6.8844E-6	-3.2378E-6	-6.92E-6	-6.1672E-6		1877.53991	-1.27E-4	-1.25E-4	9.3E-5	1807.14026	-0.00127	-0.00309
260	0.1036	0.1098	-0.37149	5.78789	6.25485		1423.34	0.08426	0.10551	3573.78681	51316	3573.78681	64512		3573.78681	0.18722	0.18674	0.18597	0.18561	0.18507	0.18488	0.18417	0.184	0.18362	0.18364	0.18191	0.18131	2226.6254	-5.9422E-6	-1.3732E-6	-5.5071E-6	-1.8336E-6	-5.4983E-6	-1.7708E-6	-5.722E-6	-1.5687E-6	-5.4216E-6	-1.5853E-6	-5.4416E-6	-4.9279E-6		1876.57559	-1.32E-4	-1.29E-4	1.24E-4	1806.17594	-0.00176	-0.00487
259	0.1029	0.1097	-0.36905	5.82802	6.29624		1424.31	0.08355	0.10427	3572.82248	58098	3572.82248	56313		3572.82248	0.18923	0.18871	0.18796	0.18759	0.18704	0.18685	0.18614	0.18598	0.18559	0.18562	0.18387	0.18327	2225.66108	-4.1402E-6	6.111E-7	-3.714E-6	4.071E-7	-3.8839E-6	1.93E-7	-3.723E-6	3.083E-7	-3.7667E-6	1.631E-7	-3.7257E-6	-3.5412E-6		1875.61126	-1.37E-4	-1.52E-4	1.41E-4	1805.21162	-0.00225	-0.00666
258	0.1022	0.1095	-0.3666	5.86815	6.38445		1425.27	0.0829	0.10315	3571.85816	62645	3571.85816	48409		3571.85816	0.19122	0.1907	0.18995	0.1896	0.18902	0.18884	0.18813	0.18795	0.18758	0.18759	0.18584	0.18523	2224.69675	-1.9705E-6	2.2177E-6	-1.7029E-6	2.196E-6	-1.9803E-6	1.7898E-6	-1.5914E-6	1.7875E-6	-1.8965E-6	1.7891E-6	-1.72E-6	-1.8067E-6		1874.64694	-1.38E-4	-1.62E-4	1.37E-4	1804.2473	-0.00262	-0.00803
257	0.1016	0.1093	-0.36416	5.97267	6.45886		1426.24	0.08235	0.10221	3570.89383	62178	3570.89383	41063		3570.89383	0.1932	0.19269	0.19194	0.19159	0.19101	0.19083	0.19012	0.1899	0.18957	0.18956	0.18781	0.18721	2223.73243	3.215E-7	3.388E-6	3.454E-7	3.3959E-6	9.99E-8	3.0182E-6	5.604E-7	2.7879E-6	1.046E-7	3.2205E-6	4.529E-7	1.579E-7		1873.68261	-1.36E-4	-1.53E-4	1.32E-4	1803.28299	-0.00276	-0.00863
256	0.1008	0.1093	-0.36172	6.0776	6.52951		1427.2	0.08193	0.10144	3569.92951	58038	3569.92951	34950		3569.92951	0.19517	0.19468	0.19392	0.19356	0.193	0.19281	0.19211	0.19187	0.19154	0.19155	0.18977	0.18919	2222.7681	2.1686E-6	4.334E-6	2.0061E-6	4.3364E-6	1.7943E-6	4.1442E-6	2.3668E-6	3.7419E-6	1.7985E-6	4.4955E-6	2.2186E-6	1.797E-6		1872.71829	-1.34E-4	-1.61E-4	1.32E-4	1802.31867	-0.00264	-0.00835
255	0.1004	0.1097	-0.35928	6.08178	6.56003		1428.16	0.08161	0.10086	3568.96518	52422	3568.96518	31907		3568.96518	0.19716	0.19669	0.19591	0.19555	0.195	0.1948	0.19411	0.19388	0.19351	0.19355	0.19175	0.19117	2221.80378	3.5143E-6	4.849E-6	3.175E-6	4.9085E-6	3.0836E-6	4.8317E-6	3.7052E-6	4.5056E-6	3.0955E-6	5.2151E-6	3.3903E-6	3.0192E-6		1871.75396	-1.43E-4	-1.76E-4	1.32E-4	1801.35435	-0.00231	-0.00733
254	0.1003	0.1103	-0.35684	6.09014	6.62524		1429.13	0.08138	0.10048	3568.00086	45203	3568.00086	29771		3568.00086	0.19918	0.19871	0.19793	0.19756	0.19699	0.19682	0.19611	0.19589	0.1955	0.19556	0.19374	0.19315	2220.83945	4.5953E-6	4.6805E-6	4.0687E-6	4.8158E-6	4.2861E-6	4.7431E-6	4.6976E-6	4.6659E-6	4.24E-6	5.0986E-6	4.2927E-6	4.1069E-6		1870.78964	-1.63E-4	-1.68E-4	1.35E-4	1800.39003	-0.00187	-0.00592
253	0.1004	0.1111	-0.3544	6.13571	6.66746		1430.09	0.08126	0.1003	3567.03654	36959	3567.03654	27513		3567.03654	0.20121	0.20073	0.19995	0.19958	0.19899	0.19883	0.19809	0.19789	0.19751	0.19756	0.19573	0.19513	2219.87513	5.1503E-6	4.0429E-6	4.5891E-6	4.3007E-6	5.0759E-6	4.2622E-6	5.1789E-6	4.341E-6	5.042E-6	4.4939E-6	4.9126E-6	4.8446E-6		1869.82532	-1.9E-4	-1.62E-4	1.36E-4	1799.42571	-0.00144	-0.00447
252	0.1006	0.1124	-0.35196	6.15995	6.73017		1431.06	0.08126	0.10033	3566.07221	31229	3566.07221	27898		3566.07221	0.20323	0.20275	0.20196	0.20159	0.201	0.20082	0.20008	0.19987	0.19953	0.19956	0.19771	0.19711	2218.9108	4.9936E-6	3.2492E-6	4.511E-6	3.7033E-6	5.1155E-6	3.7909E-6	4.9753E-6	3.8321E-6	5.1664E-6	3.79E-6	4.9325E-6	4.8786E-6		1868.86099	-2.08E-4	-1.92E-4	1.33E-4	1798.46139	-0.00107	-0.0032
251	0.101	0.1141	-0.34952	6.13529	6.75902		1432.02	0.08138	0.10054	3565.10789	30025	3565.10789	29546		3565.10789	0.20525	0.20476	0.20397	0.20359	0.20301	0.20283	0.20207	0.20186	0.20153	0.20155	0.1997	0.19909	2217.94648	4.4838E-6	2.4762E-6	4.087E-6	3.0846E-6	4.796E-6	3.3101E-6	4.346E-6	3.2362E-6	4.7597E-6	3.0935E-6	4.4546E-6	4.4103E-6		1867.89667	-2.16E-4	-2.33E-4	1.23E-4	1797.49708	-7.96E-4	-0.00223
250	0.1017	0.1165	-0.34707	6.2189	6.80584		1432.99	0.08159	0.10094	3564.14356	31076	3564.14356	29878		3564.14356	0.20725	0.20678	0.20598	0.20561	0.20502	0.20484	0.20409	0.20387	0.20353	0.20354	0.20169	0.20109	2216.98216	3.8552E-6	1.9212E-6	3.7057E-6	2.5035E-6	4.3729E-6	2.7563E-6	3.6408E-6	2.6178E-6	4.1215E-6	2.3401E-6	3.8511E-6	3.7905E-6		1866.93234	-2.31E-4	-2.51E-4	1.09E-4	1796.53276	-5.99E-4	-0.00153
249	0.1027	0.1194	-0.34463	6.18713	6.83594		1433.95	0.0819	0.10151	3563.17924	32824	3563.17924	30957		3563.17924	0.20927	0.2088	0.208	0.20762	0.20703	0.20684	0.20611	0.20589	0.20555	0.20554	0.20369	0.2031	2216.01783	3.1384E-6	1.6987E-6	3.3994E-6	2.059E-6	3.6592E-6	2.1799E-6	3.0313E-6	2.0573E-6	3.3906E-6	1.4957E-6	3.3104E-6	3.1496E-6		1865.96802	-2.39E-4	-2.47E-4	9.9E-5	1795.56844	-4.52E-4	-0.00103
248	0.104	0.1229	-0.34219	6.21514	6.83385		1434.91	0.0823	0.1022	3562.21491	37013	3562.21491	33905		3562.21491	0.2113	0.21083	0.21004	0.20964	0.20905	0.20885	0.20813	0.20793	0.20756	0.20756	0.20569	0.2051	2215.05351	2.436E-6	1.5812E-6	2.9712E-6	1.6955E-6	2.7357E-6	1.6211E-6	2.5495E-6	1.526E-6	2.6591E-6	7.346E-7	2.8247E-6	2.4945E-6		1865.00369	-2.3E-4	-2.38E-4	9.9E-5	1794.60412	-3.44E-4	-6.84069E-4
247	0.1055	0.127	-0.33975	6.15326	6.81002		1435.88	0.08279	0.103	3561.25059	43695	3561.25059	38080		3561.25059	0.21334	0.21285	0.21207	0.21166	0.21107	0.21088	0.21014	0.20995	0.20957	0.2096	0.20769	0.2071	2214.08918	1.8362E-6	1.3934E-6	2.2978E-6	1.3703E-6	1.9652E-6	1.2075E-6	2.0828E-6	1.0421E-6	1.9721E-6	4.239E-7	2.3407E-6	1.8655E-6		1864.03937	-2.24E-4	-2.35E-4	1.04E-4	1793.6398	-2.78E-4	-4.66161E-4
246	0.1073	0.1314	-0.33731	6.27408	6.77616		1436.84	0.08332	0.10386	3560.28626	48696	3560.28626	42095		3560.28626	0.21538	0.21488	0.21411	0.21369	0.21309	0.21292	0.21217	0.21195	0.21159	0.21163	0.2097	0.2091	2213.12486	1.2827E-6	1.2642E-6	1.4544E-6	1.0925E-6	1.4389E-6	1.0479E-6	1.5062E-6	6.993E-7	1.2846E-6	6.756E-7	1.7941E-6	1.3581E-6		1863.07504	-2.2E-4	-2.41E-4	1.07E-4	1792.67548	-2.46E-4	-3.15509E-4
245	0.1095	0.1363	-0.33487	6.21095	6.84095		1437.81	0.08385	0.10473	3559.32194	50549	3559.32194	42397		3559.32194	0.21742	0.21693	0.21614	0.21572	0.21513	0.21495	0.2142	0.21398	0.21362	0.21366	0.21172	0.21112	2212.16053	8.566E-7	1.1667E-6	8.163E-7	8.218E-7	1.1013E-6	9.681E-7	9.893E-7	5.323E-7	7.596E-7	1.0392E-6	1.2451E-6	1.0284E-6		1862.11072	-2.14E-4	-2.51E-4	1.03E-4	1791.71117	-2.31E-4	-2.07949E-4
244	0.1123	0.1411	-0.33243	6.08805	6.83636		1438.77	0.08435	0.10555	3558.35761	52009	3558.35761	36363		3558.35761	0.21947	0.21899	0.21817	0.21776	0.21719	0.217	0.21622	0.21602	0.21565	0.21567	0.21373	0.21314	2211.19621	8.422E-7	9.787E-7	6.467E-7	6.317E-7	9.711E-7	7.499E-7	7.422E-7	5.466E-7	6.323E-7	1.1334E-6	7.843E-7	8.514E-7		1861.14639	-2.12E-4	-2.44E-4	9.7E-5	1790.74685	-2.26E-4	-1.54816E-4
243	0.1154	0.1459	-0.32998	6.17751	6.84848		1439.74	0.0848	0.10628	3557.39329	52525	3557.39329	25163		3557.39329	0.22152	0.22104	0.22021	0.21982	0.21924	0.21904	0.21826	0.21808	0.21766	0.21767	0.21576	0.21515	2210.23188	1.0992E-6	8.415E-7	6.879E-7	6.903E-7	9.334E-7	5.549E-7	5.967E-7	7.482E-7	7.474E-7	1.1596E-6	4.014E-7	7.665E-7		1860.18207	-2.12E-4	-2.12E-4	9.2E-5	1789.78253	-2.29E-4	-1.55897E-4
242	0.1192	0.1507	-0.32754	6.2051	6.77448		1440.7	0.08521	0.10691	3556.42897	49061	3556.42896	14439		3556.42897	0.22358	0.2231	0.22226	0.22187	0.22128	0.22109	0.22032	0.22012	0.2197	0.2197	0.21779	0.21719	2209.26756	1.2011E-6	7.924E-7	7.502E-7	9.153E-7	8.272E-7	6.241E-7	4.146E-7	1.0107E-6	8.222E-7	1.2362E-6	2.126E-7	7.524E-7		1859.21775	-2.15E-4	-1.9E-4	9E-5	1788.81821	-2.36E-4	-1.78244E-4
241	0.1236	0.1557	-0.3251	6.14616	6.7448		1441.67	0.08558	0.10747	3555.46464	43723	3555.46464	12476		3555.46464	0.22565	0.22515	0.22432	0.22392	0.22333	0.22315	0.2224	0.22216	0.22175	0.22175	0.21982	0.21923	2208.30323	1.1723E-6	6.567E-7	9.832E-7	9.907E-7	7.638E-7	7.736E-7	4.791E-7	1.1009E-6	8.485E-7	1.1085E-6	3.473E-7	8.429E-7		1858.25342	-2.24E-4	-1.95E-4	9.4E-5	1787.85389	-2.4E-4	-1.92118E-4
240	0.1287	0.1613	-0.32266	6.0266	6.72014		1442.63	0.08593	0.10799	3554.50032	41877	3554.50032	19865		3554.50032	0.22773	0.22719	0.2264	0.22597	0.2254	0.22522	0.22447	0.22421	0.22381	0.22381	0.22185	0.22125	2207.33891	1.1821E-6	6.042E-7	1.3116E-6	9.715E-7	8.865E-7	8.382E-7	8.049E-7	1.0884E-6	8.425E-7	9.108E-7	5.866E-7	9.289E-7		1857.2891	-2.34E-4	-2.1E-4	1.01E-4	1786.88957	-2.36E-4	-1.94071E-4
239	0.1351	0.167	-0.32022	6.03914	6.65785		1443.59	0.08631	0.10854	3553.53599	43989	3553.53599	26380		3553.53599	0.22982	0.22926	0.22848	0.22804	0.22746	0.2273	0.22651	0.22627	0.22587	0.22588	0.2239	0.22326	2206.37459	1.0756E-6	8.242E-7	1.4577E-6	1.0938E-6	9.394E-7	9.307E-7	8.981E-7	1.1321E-6	6.764E-7	8.731E-7	6.471E-7	7.826E-7		1856.32477	-2.4E-4	-2.33E-4	9.8E-5	1785.92526	-2.33E-4	-1.94656E-4
238	0.1425	0.1735	-0.31778	6.03078	6.60936		1444.56	0.08675	0.1092	3552.57167	46519	3552.57167	29017		3552.57167	0.23189	0.23133	0.23056	0.23011	0.22952	0.22934	0.22855	0.22833	0.22793	0.22794	0.22595	0.2253	2205.41026	9.287E-7	9.039E-7	1.4683E-6	1.0635E-6	7.658E-7	8.636E-7	8.242E-7	9.347E-7	5.559E-7	6.192E-7	7.281E-7	5.91E-7		1855.36045	-2.36E-4	-2.68E-4	8.1E-5	1784.96094	-2.33E-4	-1.96755E-4
237	0.151	0.1805	-0.31534	5.97434	6.56086		1445.52	0.08728	0.10997	3551.60734	47204	3551.60734	34872		3551.60734	0.23396	0.2334	0.23261	0.23218	0.23158	0.23138	0.2306	0.23039	0.22998	0.22999	0.22799	0.22735	2204.44594	9.697E-7	5.754E-7	1.4187E-6	6.571E-7	5.895E-7	4.401E-7	1.0143E-6	3.577E-7	7.415E-7	6.59E-8	1.06E-6	6.25E-7		1854.39612	-2.3E-4	-2.97E-4	6.9E-5	1783.99662	-2.31E-4	-1.94894E-4
236	0.1607	0.1882	-0.31289	5.95762	6.44841		1446.49	0.08788	0.11086	3550.64302	44266	3550.64302	41564		3550.64302	0.23602	0.23548	0.23467	0.23424	0.23364	0.23343	0.23266	0.23244	0.23205	0.23204	0.23002	0.22941	2203.48161	8.431E-7	2.788E-7	9.571E-7	3.211E-7	3.418E-7	1.279E-7	1.1043E-6	-5.68E-8	7.958E-7	-1.68E-7	1.2175E-6	5.448E-7		1853.4318	-2.41E-4	-3.09E-4	8.2E-5	1783.0323	-2.35E-4	-1.86834E-4
235	0.1725	0.1968	-0.31045	5.9133	6.48143		1447.45	0.08855	0.11185	3549.67869	37464	3549.67869	39436		3549.67869	0.2381	0.23757	0.23676	0.2363	0.23571	0.2355	0.23475	0.23451	0.23413	0.2341	0.23208	0.23146	2202.51729	2.971E-7	3.695E-7	7.16E-8	3.179E-7	-8.73E-8	3.128E-7	6.543E-7	4.68E-8	3.648E-7	1.545E-7	8.439E-7	1.337E-7		1852.46747	-2.55E-4	-3.09E-4	1.07E-4	1782.06798	-2.46E-4	-1.89825E-4
234	0.1858	0.206	-0.30801	5.90745	6.41245		1448.42	0.08926	0.11291	3548.71437	30143	3548.71437	25715		3548.71437	0.24018	0.23965	0.23884	0.23837	0.2378	0.23758	0.23682	0.23658	0.23622	0.23617	0.23414	0.23351	2201.55296	-1.476E-7	5.489E-7	-4.802E-7	3.008E-7	-2.335E-7	5.334E-7	1.497E-7	2.883E-7	-3.11E-8	5.471E-7	3.521E-7	-1.568E-7		1851.50315	-2.46E-4	-2.83E-4	1.2E-4	1781.10366	-2.51E-4	-2.36059E-4
233	0.2012	0.2164	-0.30557	5.8552	6.27408		1449.38	0.08995	0.11396	3547.75004	25097	3547.75004	5576		3547.75004	0.24226	0.24173	0.24093	0.24046	0.23987	0.23966	0.23888	0.23866	0.23829	0.23825	0.23618	0.23557	2200.58864	-7.85E-8	5.336E-7	-2.767E-7	1.771E-7	2.142E-7	4.525E-7	1.345E-7	4.181E-7	1.099E-7	7.219E-7	2.035E-7	-5.77E-8		1850.53882	-2.3E-4	-2.41E-4	1.14E-4	1780.13935	-2.46E-4	-3.0814E-4
232	0.219	0.2281	-0.30313	5.86565	6.20845		1450.34	0.0906	0.11492	3546.78572	21783	3546.78572	-11871		3546.78572	0.24434	0.24382	0.24301	0.24257	0.24194	0.24174	0.24093	0.24075	0.24036	0.24031	0.23823	0.23762	2199.62431	2.017E-7	5.232E-7	1.744E-7	2.448E-7	8.063E-7	4.286E-7	3.777E-7	6.702E-7	4.594E-7	8.889E-7	2.296E-7	1.569E-7		1849.5745	-2.22E-4	-2.13E-4	1.03E-4	1779.17503	-2.5E-4	-3.35817E-4
231	0.2394	0.2408	-0.30069	5.8021	6.16372		1451.31	0.09114	0.11571	3545.8214	17534	3545.82139	-19640		3545.8214	0.24643	0.2459	0.24509	0.24466	0.24401	0.24381	0.24301	0.24283	0.24241	0.24236	0.24028	0.23968	2198.65999	3.471E-7	6.038E-7	4.283E-7	4.401E-7	1.1097E-6	6.458E-7	5.746E-7	9.892E-7	6.248E-7	1.0211E-6	1.883E-7	4.091E-7		1848.61018	-2.09E-4	-1.95E-4	9.5E-5	1778.21071	-2.67E-4	-3.17847E-4
230	0.2624	0.254	-0.29825	5.76322	6.09139		1452.27	0.09153	0.11625	3544.85707	11856	3544.85707	-17189		3544.85707	0.2485	0.24797	0.24716	0.24673	0.24609	0.24587	0.24509	0.2449	0.24446	0.24441	0.24233	0.24172	2197.69566	4.873E-7	6.369E-7	6.811E-7	4.918E-7	1.2497E-6	8.913E-7	8.131E-7	1.0632E-6	7.715E-7	8.646E-7	2.201E-7	8.201E-7		1847.64585	-1.87E-4	-1.67E-4	9.6E-5	1777.24639	-2.81E-4	-3.25378E-4
229	0.2807	0.2619	-0.2958	5.80085	5.94884		1453.24	0.09173	0.11646	3543.89275	9748	3543.89275	-6460		3543.89275	0.25058	0.25005	0.24923	0.24879	0.24816	0.24794	0.24717	0.24695	0.2465	0.24647	0.24437	0.24375	2196.73134	7.036E-7	7.949E-7	9.758E-7	5.423E-7	1.2911E-6	1.1149E-6	9.978E-7	9.662E-7	9.009E-7	6.763E-7	3.603E-7	1.1212E-6		1846.68153	-1.61E-4	-1.38E-4	9.8E-5	1776.28207	-2.77E-4	-3.68528E-4
228	0.2941	0.2648	-0.29336	5.67042	5.87526		1454.2	0.09174	0.11633	3542.92842	11888	3542.92842	7902		3542.92842	0.25267	0.25213	0.25131	0.25085	0.25024	0.25002	0.24925	0.24901	0.24856	0.24856	0.24644	0.24579	2195.76702	8.552E-7	1.0767E-6	1.0549E-6	7.435E-7	1.0168E-6	1.2711E-6	8.732E-7	8.501E-7	8.392E-7	7.106E-7	4.656E-7	1.0651E-6		1845.7172	-1.34E-4	-1.28E-4	9.9E-5	1775.31776	-2.62E-4	-4.05662E-4
227	0.3003	0.2604	-0.29092	5.62234	5.85896		1455.17	0.09152	0.11584	3541.9641	11878	3541.9641	19225		3541.9641	0.25477	0.25422	0.25341	0.25293	0.25233	0.25211	0.25134	0.2511	0.25064	0.25066	0.24851	0.24784	2194.80269	1.107E-6	9.713E-7	1.0661E-6	8.164E-7	5.838E-7	1.067E-6	6.565E-7	5.933E-7	9.109E-7	5.962E-7	6.375E-7	9.472E-7		1844.75288	-1.09E-4	-1.38E-4	1.01E-4	1774.35344	-2.45E-4	-4.15165E-4
226	0.296	0.2454	-0.28848	5.66373	5.78287		1456.13	0.09112	0.11505	3540.99977	7995	3540.99977	26322		3540.99977	0.25686	0.25633	0.2555	0.25503	0.25442	0.2542	0.25343	0.25319	0.25274	0.25276	0.25058	0.2499	2193.83837	1.5153E-6	4.28E-7	1.1202E-6	6.179E-7	3.592E-7	5.031E-7	6.836E-7	2.383E-7	1.2507E-6	1.422E-7	8.858E-7	9.492E-7		1843.78855	-9.8E-5	-1.45E-4	1.08E-4	1773.38912	-2.37E-4	-3.87017E-4
225	0.2758	0.2128	-0.28604	5.59308	5.60896		1457.09	0.0906	0.11405	3540.03545	5628	3540.03545	29405		3540.03545	0.25894	0.25842	0.25757	0.25712	0.25651	0.25629	0.25551	0.25528	0.25483	0.25484	0.25264	0.25197	2192.87404	1.5502E-6	2.79E-8	8.571E-7	3.958E-7	2.321E-7	1.18E-8	6.864E-7	4.05E-8	1.2816E-6	-2.681E-7	8.605E-7	7.361E-7		1842.82423	-1.12E-4	-1.45E-4	1.14E-4	1772.4248	-2.4E-4	-3.44771E-4
224	0.2336	0.1674	-0.2836	5.55629	5.6307		1458.06	0.09004	0.11297	3539.07112	9247	3539.07112	22549		3539.07112	0.26104	0.26049	0.25963	0.2592	0.25858	0.25836	0.25759	0.25736	0.2569	0.2569	0.2547	0.25404	2191.90972	9.735E-7	-5.86E-8	2.953E-7	2.637E-7	1.94E-8	-2.265E-7	3.401E-7	-3.99E-8	7.43E-7	-3.784E-7	4.938E-7	2.263E-7		1841.8599	-1.41E-4	-1.47E-4	1.12E-4	1771.46048	-2.5E-4	-3.28801E-4
223	0.1777	0.1156	-0.28116	5.50403	5.49693		1459.02	0.08948	0.1119	3538.1068	14155	3538.1068	4777		3538.1068	0.26314	0.26256	0.26171	0.26129	0.26067	0.26043	0.25966	0.25943	0.25898	0.25896	0.25676	0.25611	2190.94539	3.028E-7	-1.25E-7	-5.94E-8	1.48E-7	-6.84E-8	-3.562E-7	-6.08E-8	-2.01E-7	1.309E-7	-2.473E-7	1.602E-7	-1.74E-7		1840.89558	-1.65E-4	-1.5E-4	1.01E-4	1770.49616	-2.52E-4	-3.42494E-4
222	0.1156	0.0659	-0.27871	5.44676	5.44467		1459.99	0.08892	0.11084	3537.14247	12295	3537.14247	-14202		3537.14247	0.26524	0.26467	0.26382	0.26338	0.26276	0.2625	0.26173	0.26151	0.26107	0.26106	0.25883	0.25817	2189.98107	-1.212E-7	-1.958E-7	-9.99E-8	1.386E-7	5.55E-8	-3.984E-7	-2.042E-7	-3.551E-7	-2.344E-7	8.7E-8	-6.7E-9	-2.894E-7		1839.93125	-1.61E-4	-1.46E-4	9.1E-5	1769.53185	-2.46E-4	-3.62005E-4
221	0.0601	0.0279	-0.27627	5.39492	5.36273		1460.95	0.08838	0.10976	3536.17815	5032	3536.17815	-24477		3536.17815	0.26733	0.26678	0.26592	0.26546	0.26485	0.26458	0.2638	0.26359	0.26315	0.26317	0.26092	0.26024	2189.01674	-4.078E-7	-1.544E-7	-9.22E-8	2.501E-7	1.536E-7	-3.509E-7	-1.608E-7	-3.73E-7	-4.809E-7	4.627E-7	-1.341E-7	-2.351E-7		1838.96693	-1.34E-4	-1.47E-4	8.8E-5	1768.56753	-2.45E-4	-3.62469E-4
220	0.0226	0.0067	-0.27383	5.39325	5.26784		1461.92	0.08783	0.10861	3535.21383	-616	3535.21382	-25512		3535.21383	0.26942	0.26888	0.26801	0.26756	0.26692	0.26667	0.26589	0.26568	0.26522	0.26525	0.26302	0.26231	2188.05242	-4.266E-7	-7.02E-8	-6.98E-8	2.791E-7	1.182E-7	-2.827E-7	4E-10	-2.873E-7	-5.878E-7	5.289E-7	-1.868E-7	-4.2E-9		1838.00261	-1.22E-4	-1.64E-4	9.2E-5	1767.60321	-2.51E-4	-3.55759E-4
219	0.0068	0.0006	-0.27139	5.36148	5.2022		1462.88	0.08724	0.10742	3534.2495	-129	3534.2495	-24620		3534.2495	0.27152	0.27098	0.27009	0.26966	0.269	0.26877	0.26799	0.26777	0.26729	0.26731	0.26509	0.26437	2187.08809	-1.064E-7	5.34E-8	2.19E-8	2.359E-7	2.15E-8	-1.035E-7	1.345E-7	-1.286E-7	-4.853E-7	2.893E-7	-1.778E-7	3.224E-7		1837.03828	-1.3E-4	-1.73E-4	1.03E-4	1766.63889	-2.57E-4	-3.63553E-4
218	-0.0021	-0.0015	-0.26895	5.37946	5.14535		1463.84	0.08658	0.10621	3533.28518	5376	3533.28518	-24502		3533.28518	0.27361	0.27307	0.27218	0.27175	0.2711	0.27087	0.27009	0.26985	0.26937	0.26939	0.26715	0.26644	2186.12377	1.543E-7	2.941E-7	1.455E-7	2.822E-7	-6.6E-8	3.185E-7	2.84E-8	9.56E-8	-3.186E-7	1.107E-7	-2.416E-7	4.376E-7		1836.07396	-1.22E-4	-1.5E-4	1.19E-4	1765.67457	-2.66E-4	-3.74491E-4
217	-0.0063	-0.0031	-0.26651	5.3272	5.12779		1464.81	0.08593	0.10507	3532.32085	10790	3532.32085	-21260		3532.32085	0.27569	0.27515	0.27428	0.27381	0.27319	0.27296	0.27215	0.27192	0.27145	0.27146	0.26919	0.26849	2185.15945	1.685E-7	5.109E-7	3.182E-7	3.15E-7	-1.046E-7	7.534E-7	-1.73E-7	3.039E-7	-1.419E-7	3.75E-8	-2.94E-7	2.952E-7		1835.10963	-9.4E-5	-1.1E-4	1.29E-4	1764.71025	-2.81E-4	-3.91901E-4
216	-0.0071	-0.0038	-0.26407	5.3318	5.01283		1465.77	0.08535	0.10409	3531.35653	13414	3531.35653	-16632		3531.35653	0.27777	0.27723	0.27637	0.2759	0.27527	0.27503	0.2742	0.27399	0.27354	0.27352	0.27123	0.27054	2184.19512	1.787E-7	4.299E-7	5.35E-7	1.741E-7	-7.14E-8	7.749E-7	-1.297E-7	3.73E-7	1.587E-7	-1.785E-7	-1.443E-7	2E-7		1834.14531	-7.6E-5	-7.8E-5	1.23E-4	1763.74594	-2.95E-4	-4.29773E-4
215	-0.0062	-0.0028	-0.26162	5.26031	4.93256		1466.74	0.08488	0.10329	3530.3922	12224	3530.3922	-16568		3530.3922	0.27986	0.27931	0.27846	0.27801	0.27736	0.2771	0.27629	0.27608	0.27562	0.27558	0.27328	0.27259	2183.2308	2.41E-7	1.448E-7	6.297E-7	-2.5E-9	6.71E-8	4.458E-7	1.601E-7	3.688E-7	4.826E-7	-4.357E-7	1.068E-7	2.087E-7		1833.18098	-8.5E-5	-7.7E-5	1.04E-4	1762.78162	-2.96E-4	-4.58867E-4
214	-0.008	-0.0044	-0.25918	5.24108	4.94176		1467.7	0.08449	0.10263	3529.42788	8293	3529.42788	-21515		3529.42788	0.28196	0.28141	0.28055	0.28012	0.27945	0.27919	0.27839	0.27818	0.27769	0.27767	0.27534	0.27467	2182.26647	1.285E-7	1.6E-9	3.701E-7	-1.91E-7	2.727E-7	1.245E-7	3.806E-7	3.335E-7	5.356E-7	-5.647E-7	2.135E-7	5.91E-8		1832.21666	-1.06E-4	-9.6E-5	9.2E-5	1761.8173	-2.84E-4	-4.40094E-4
213	-0.007	-0.0047	-0.25674	5.2206	4.86525		1468.67	0.08417	0.10205	3528.46355	5608	3528.46355	-26294		3528.46355	0.28406	0.2835	0.28263	0.28221	0.28153	0.28127	0.28048	0.28027	0.27978	0.27976	0.27741	0.27676	2181.30215	-1.186E-7	-5.2E-8	-1.342E-7	-6.246E-7	5.051E-7	-2.422E-7	4.207E-7	3.72E-8	3.489E-7	-7.031E-7	2.742E-7	-2.391E-7		1831.25233	-1.2E-4	-9.7E-5	9.5E-5	1760.85298	-2.73E-4	-3.89251E-4
212	-0.0075	-0.0037	-0.2543	5.26575	4.78457		1469.63	0.08386	0.10152	3527.49923	2835	3527.49923	-27380		3527.49923	0.28615	0.28559	0.28472	0.28427	0.2836	0.28334	0.28256	0.28233	0.28187	0.28184	0.27948	0.2788	2180.33782	-2.784E-7	-2.371E-7	-5.802E-7	-1.1478E-6	6.436E-7	-7.551E-7	3.572E-7	-4.939E-7	9.3E-8	-7.764E-7	3.923E-7	-4.561E-7		1830.28801	-1.26E-4	-8.7E-5	1.01E-4	1759.88866	-2.64E-4	-3.50148E-4
211	-0.0079	-0.0027	-0.25186	5.16332	4.71392		1470.59	0.08356	0.10097	3526.5349	-2692	3526.5349	-25555		3526.5349	0.28824	0.28766	0.2868	0.28634	0.28567	0.28542	0.28463	0.28439	0.28394	0.2839	0.28155	0.28082	2179.3735	-4.431E-7	-3.524E-7	-9.791E-7	-1.2719E-6	4.426E-7	-1.0604E-6	1.025E-7	-8.057E-7	-3.114E-7	-4.728E-7	2.622E-7	-5.904E-7		1829.32368	-1.32E-4	-1.03E-4	1.13E-4	1758.92434	-2.54E-4	-3.3624E-4
210	-0.0064	-0.0031	-0.24942	5.17043	4.68257		1471.56	0.08327	0.1004	3525.57058	-8363	3525.57058	-22395		3525.57058	0.29032	0.28974	0.28888	0.28842	0.28773	0.2875	0.28669	0.28643	0.28598	0.28594	0.28361	0.28286	2178.40917	-6.733E-7	-2.505E-7	-1.2827E-6	-9.357E-7	-4.87E-8	-1.0053E-6	-3.334E-7	-7.076E-7	-7.838E-7	5.24E-8	-1.898E-7	-7.061E-7		1828.35936	-1.29E-4	-1.26E-4	1.38E-4	1757.96003	-2.45E-4	-3.38252E-4
209	-0.0075	-0.0056	-0.24698	5.17043	4.67922		1472.52	0.08298	0.09979	3524.60626	-12038	3524.60625	-18820		3524.60626	0.2924	0.29183	0.29095	0.29049	0.2898	0.28959	0.28875	0.2885	0.288	0.28801	0.28568	0.28492	2177.44485	-6.305E-7	-2.391E-7	-1.1467E-6	-5.662E-7	-4.905E-7	-9.382E-7	-6.621E-7	-5.214E-7	-9.232E-7	2.552E-7	-5.545E-7	-6.704E-7		1827.39504	-1.15E-4	-1.34E-4	1.51E-4	1756.99571	-2.39E-4	-3.49703E-4
208	-0.0077	-0.0045	-0.24453	5.08808	4.6161		1473.49	0.08266	0.09918	3523.64193	-13930	3523.64193	-15630		3523.64193	0.29448	0.29392	0.29303	0.29255	0.29189	0.29166	0.29081	0.29058	0.29006	0.29008	0.28773	0.28696	2176.48052	-2.515E-7	-4.389E-7	-6.142E-7	-3.814E-7	-7.436E-7	-9.033E-7	-8.077E-7	-4.552E-7	-6.652E-7	7.71E-8	-6.748E-7	-5.127E-7		1826.43071	-1.06E-4	-1.48E-4	1.33E-4	1756.03139	-2.39E-4	-3.72065E-4
207	-0.0079	-0.0056	-0.24209	5.04627	4.55088		1474.45	0.08233	0.0986	3522.67761	-15569	3522.67761	-15200		3522.67761	0.29657	0.296	0.29509	0.2946	0.29396	0.29373	0.29286	0.29266	0.29214	0.29214	0.28977	0.28899	2175.5162	-5.75E-8	-5.954E-7	-2.173E-7	-2.191E-7	-9.094E-7	-6.304E-7	-1.0102E-6	-4.213E-7	-4.633E-7	-1.198E-7	-7.808E-7	-5.506E-7		1825.46639	-1.02E-4	-1.71E-4	1E-4	1755.06707	-2.38E-4	-3.94608E-4
206	-0.0085	-0.0063	-0.23965	5.09685	4.49194		1475.42	0.08203	0.09812	3521.71328	-16036	3521.71328	-20604		3521.71328	0.29864	0.29805	0.29715	0.29666	0.29602	0.29579	0.29494	0.29472	0.29422	0.29421	0.29179	0.29101	2174.55188	-2.469E-7	-6.401E-7	-1.38E-7	-7.07E-8	-9.992E-7	-2.943E-7	-1.1974E-6	-4.499E-7	-4.829E-7	-3.488E-7	-9.118E-7	-7.69E-7		1824.50206	-1.07E-4	-1.76E-4	8.2E-5	1754.10275	-2.29E-4	-4.01357E-4
205	-0.0088	-0.0047	-0.23721	5.06884	4.4794		1476.38	0.08182	0.09778	3520.74896	-10777	3520.74896	-30238		3520.74896	0.30069	0.30011	0.29921	0.29873	0.2981	0.29785	0.29701	0.29678	0.29629	0.29628	0.2938	0.29304	2173.58755	-4.76E-7	-6.868E-7	-8.63E-8	-5.56E-8	-9.775E-7	-2.72E-7	-1.0915E-6	-5.98E-7	-4.871E-7	-7.582E-7	-8.963E-7	-8.355E-7		1823.53774	-1.26E-4	-1.6E-4	8.3E-5	1753.13844	-2.24E-4	-3.97927E-4
204	-0.0068	-0.0045	-0.23477	5.01492	4.42087		1477.35	0.08174	0.09763	3519.78463	-647	3519.78463	-38850		3519.78463	0.30274	0.30219	0.30126	0.30079	0.30017	0.2999	0.29905	0.29883	0.29835	0.29834	0.29581	0.29508	2172.62323	-6.375E-7	-7.595E-7	-4.24E-8	-1.023E-7	-9.681E-7	-4.899E-7	-8.122E-7	-7.384E-7	-5.113E-7	-1.1673E-6	-7.251E-7	-7.847E-7		1822.57341	-1.45E-4	-1.46E-4	8.3E-5	1752.17412	-2.33E-4	-3.99187E-4
203	-0.0095	-0.0053	-0.23233	5.03749	4.43257		1478.31	0.08179	0.0977	3518.82031	6812	3518.82031	-41880		3518.82031	0.3048	0.30426	0.30331	0.30285	0.30221	0.30195	0.3011	0.30087	0.30038	0.30038	0.29784	0.29713	2171.6589	-8.051E-7	-8.808E-7	-2.349E-7	-2.394E-7	-1.0007E-6	-6.777E-7	-5.56E-7	-8.475E-7	-6.538E-7	-1.4222E-6	-5.253E-7	-8.64E-7		1821.60909	-1.55E-4	-1.46E-4	7.6E-5	1751.2098	-2.43E-4	-4.04236E-4
202	-0.0065	-0.008	-0.22989	5.00697	4.35398		1479.27	0.08197	0.09798	3517.85598	5936	3517.85598	-38308		3517.85598	0.30687	0.30632	0.30537	0.30492	0.30424	0.304	0.30316	0.3029	0.30241	0.30239	0.29987	0.29917	2170.69458	-8.378E-7	-1.097E-6	-5.827E-7	-6.808E-7	-9.387E-7	-8.918E-7	-3.014E-7	-1.1003E-6	-7.128E-7	-1.5865E-6	-3.757E-7	-1.0179E-6		1820.64476	-1.63E-4	-1.43E-4	7.7E-5	1750.24548	-2.42E-4	-4.04502E-4
201	-0.0033	-0.0091	-0.22744	5.01074	4.336		1480.24	0.08229	0.0985	3516.89166	-2516	3516.89166	-32868		3516.89166	0.30894	0.30838	0.30743	0.30697	0.30628	0.30604	0.3052	0.30492	0.30446	0.30442	0.30192	0.3012	2169.73025	-7.381E-7	-1.307E-6	-8.808E-7	-1.2569E-6	-8.22E-7	-1.183E-6	-1.661E-7	-1.4173E-6	-6.984E-7	-1.642E-6	-3.591E-7	-1.087E-6		1819.68044	-1.79E-4	-1.39E-4	9E-5	1749.28116	-2.4E-4	-4.1007E-4
200	-0.0037	-0.0064	-0.225	5.01283	4.32973		1481.2	0.08276	0.09924	3515.92733	-13668	3515.92733	-29795		3515.92733	0.311	0.31043	0.30949	0.309	0.30833	0.30809	0.30724	0.30695	0.30651	0.30647	0.30398	0.30322	2168.76593	-7.857E-7	-1.3281E-6	-1.1245E-6	-1.5682E-6	-8.597E-7	-1.2733E-6	-3.756E-7	-1.4238E-6	-9.263E-7	-1.4712E-6	-6.171E-7	-1.1085E-6		1818.71611	-1.92E-4	-1.6E-4	9.7E-5	1748.31684	-2.43E-4	-4.27424E-4
			-0.22256	4.91793	4.28375		1482.17	0.08337	0.10019	3514.96301	-22512	3514.96301	-28034		3514.96301	0.31305	0.31247	0.31154	0.31104	0.31038	0.31014	0.30928	0.309	0.30855	0.30852	0.30601	0.30526	2167.8016	-9.944E-7	-1.2319E-6	-1.2302E-6	-1.6081E-6	-9.889E-7	-1.0868E-6	-7.86E-7	-1.1099E-6	-1.2673E-6	-1.1311E-6	-1.0589E-6	-1.0619E-6		1817.75179	-1.87E-4	-1.98E-4	9.2E-5	1747.35253	-2.46E-4	-4.35735E-4
			-0.22012	5.00781	4.2779		1483.13	0.0841	0.10137	3513.99868	-26398	3513.99868	-28834		3513.99868	0.3151	0.31451	0.31357	0.31309	0.31243	0.31219	0.31131	0.31104	0.31058	0.31055	0.30802	0.30731	2166.83728	-1.0389E-6	-1.2574E-6	-1.0496E-6	-1.5865E-6	-9.419E-7	-8.903E-7	-1.004E-6	-8.625E-7	-1.2668E-6	-8.52E-7	-1.3253E-6	-8.436E-7		1816.78747	-1.7E-4	-2.18E-4	9.2E-5	1746.38821	-2.47E-4	-4.23471E-4
			-0.21768	4.97311	4.28751		1484.1	0.08494	0.10276	3513.03436	-27577	3513.03436	-34912		3513.03436	0.31712	0.31654	0.31559	0.31516	0.31447	0.31423	0.31334	0.31309	0.3126	0.31258	0.31003	0.30931	2165.87295	-9.216E-7	-1.3432E-6	-7.924E-7	-1.56E-6	-7.733E-7	-8.057E-7	-1.0392E-6	-8.291E-7	-9.625E-7	-7.352E-7	-1.3043E-6	-6.041E-7		1815.82314	-1.6E-4	-2.29E-4	1.02E-4	1745.42389	-2.4E-4	-4.02851E-4
			-0.21524	4.92963	4.21937		1485.06	0.0859	0.10436	3512.07004	-28871	3512.07004	-40562		3512.07004	0.31913	0.31858	0.31762	0.31721	0.31651	0.31626	0.31537	0.31513	0.31462	0.31461	0.31203	0.31129	2164.90863	-9.845E-7	-1.2921E-6	-7.989E-7	-1.4498E-6	-7.322E-7	-8.109E-7	-1.1718E-6	-8.929E-7	-7.633E-7	-6.795E-7	-1.2027E-6	-5.676E-7		1814.85882	-1.77E-4	-2.54E-4	1.09E-4	1744.45957	-2.33E-4	-3.94189E-4
			-0.2128	4.94134	4.1876		1486.02	0.08699	0.10616	3511.10571	-28394	3511.10571	-40509		3511.10571	0.32116	0.32063	0.31966	0.31922	0.31854	0.31827	0.3174	0.31716	0.31664	0.31664	0.31405	0.31327	2163.94431	-1.1806E-6	-1.1246E-6	-9.889E-7	-1.2237E-6	-8.226E-7	-9.467E-7	-1.3094E-6	-9.454E-7	-7.859E-7	-6.655E-7	-1.0861E-6	-6.554E-7		1813.89449	-2.07E-4	-2.75E-4	1.1E-4	1743.49525	-2.34E-4	-4.06972E-4
			-0.21035	4.92211	4.20098		1486.99	0.08818	0.10815	3510.14139	-26281	3510.14139	-41346		3510.14139	0.3232	0.32266	0.3217	0.32121	0.32057	0.32028	0.3194	0.31918	0.31866	0.31867	0.31605	0.31527	2162.97998	-1.2242E-6	-8.867E-7	-1.0521E-6	-9.543E-7	-9.44E-7	-1.1994E-6	-1.2432E-6	-9.098E-7	-8.563E-7	-7.78E-7	-9.689E-7	-6.837E-7		1812.93017	-2.2E-4	-2.76E-4	1.07E-4	1742.53093	-2.38E-4	-4.23872E-4
			-0.20791	4.89285	4.14579		1487.95	0.08949	0.11031	3509.17706	-25671	3509.17706	-47364		3509.17706	0.32521	0.32464	0.32374	0.32322	0.32257	0.32227	0.3214	0.32117	0.32066	0.32068	0.31804	0.31726	2162.01566	-1.1572E-6	-6.341E-7	-9.264E-7	-7.233E-7	-1.0487E-6	-1.3964E-6	-1.1405E-6	-8.78E-7	-9.229E-7	-9.782E-7	-1.0032E-6	-7.379E-7		1811.96584	-2.27E-4	-2.65E-4	9.5E-5	1741.56662	-2.42E-4	-4.27698E-4
			-0.20547	4.9242	4.21853		1488.92	0.09087	0.11262	3508.21274	-25171	3508.21274	-53340		3508.21274	0.3272	0.32665	0.32574	0.32523	0.32457	0.32427	0.3234	0.32316	0.32266	0.32268	0.32	0.31924	2161.05133	-1.0703E-6	-5.859E-7	-8.102E-7	-6.15E-7	-1.0358E-6	-1.3969E-6	-1.1134E-6	-1.0148E-6	-1.0353E-6	-1.1709E-6	-1.1358E-6	-9.665E-7		1811.00152	-2.42E-4	-2.48E-4	7.8E-5	1740.6023	-2.39E-4	-4.11516E-4
			-0.20303	4.89619	4.17756		1489.88	0.09231	0.11505	3507.24841	-20343	3507.24841	-54190		3507.24841	0.32922	0.32869	0.32774	0.32724	0.32658	0.3263	0.32541	0.32516	0.32468	0.3247	0.32198	0.32124	2160.08701	-9.199E-7	-7.716E-7	-8.945E-7	-6.198E-7	-8.762E-7	-1.2466E-6	-1.0153E-6	-1.2629E-6	-1.1669E-6	-1.2645E-6	-1.2021E-6	-1.2722E-6		1810.03719	-2.39E-4	-2.17E-4	7.1E-5	1739.63798	-2.28E-4	-3.64118E-4
			-0.20059	4.92587	4.09145		1490.85	0.0938	0.11756	3506.28409	-12480	3506.28409	-51136		3506.28409	0.33126	0.33073	0.32972	0.32926	0.32859	0.32832	0.32742	0.32717	0.32668	0.32671	0.32398	0.32321	2159.12268	-8.071E-7	-8.948E-7	-1.1778E-6	-6.15E-7	-7.885E-7	-1.0387E-6	-9.132E-7	-1.3662E-6	-1.3233E-6	-1.1669E-6	-1.2995E-6	-1.5165E-6		1809.07287	-1.93E-4	-1.71E-4	7.8E-5	1738.67366	-2.21E-4	-3.02442E-4
			-0.19815	4.88741	4.14412		1491.81	0.09533	0.12014	3505.31976	-8524	3505.31976	-49760		3505.31976	0.33327	0.33273	0.33171	0.33127	0.33057	0.33031	0.32943	0.32916	0.32865	0.32868	0.32597	0.32516	2158.15836	-8.213E-7	-8.411E-7	-1.496E-6	-5.745E-7	-8.914E-7	-8.265E-7	-9.498E-7	-1.187E-6	-1.5091E-6	-9.927E-7	-1.487E-6	-1.608E-6		1808.10854	-1.26E-4	-1.14E-4	8.9E-5	1737.70934	-2.32E-4	-2.87626E-4
			-0.19571	4.86693	4.10942		1492.77	0.09687	0.12277	3504.35544	-10133	3504.35544	-50510		3504.35544	0.33525	0.33471	0.3337	0.33326	0.33254	0.33229	0.33141	0.33116	0.33062	0.33064	0.32792	0.32712	2157.19403	-8.343E-7	-8.011E-7	-1.59E-6	-5.941E-7	-9.472E-7	-6.439E-7	-9.898E-7	-8.961E-7	-1.5658E-6	-9.525E-7	-1.5071E-6	-1.4242E-6		1807.14422	-4.8E-5	-2.9E-5	9.3E-5	1736.74502	-2.52E-4	-3.28567E-4
			-0.19327	4.87153	4.109		1493.74	0.09842	0.12543	3503.39111	-12753	3503.39111	-52049		3503.39111	0.33724	0.33671	0.3357	0.33525	0.33454	0.33428	0.33339	0.33315	0.33262	0.3326	0.32985	0.3291	2156.22971	-7.923E-7	-8.865E-7	-1.3592E-6	-6.673E-7	-8.586E-7	-4.929E-7	-8.833E-7	-7.211E-7	-1.3856E-6	-9.89E-7	-1.2251E-6	-1.0385E-6		1806.1799	6.5E-5	1.22E-4	1.01E-4	1735.78071	-2.59E-4	-3.61277E-4
			-0.19082	4.90748	4.04379		1494.7	0.09997	0.12808	3502.42679	-14436	3502.42679	-58614		3502.42679	0.33924	0.33871	0.3377	0.33723	0.33655	0.33628	0.33537	0.33514	0.3346	0.33456	0.33181	0.33107	2155.26538	-7.887E-7	-1.0579E-6	-1.0595E-6	-7.654E-7	-8.374E-7	-4.666E-7	-7.275E-7	-7.119E-7	-1.1073E-6	-9.9E-7	-8.315E-7	-7.438E-7		1805.21557	2.26E-4	3.68E-4	1.19E-4	1734.81639	-2.47E-4	-3.52736E-4
			-0.18838	4.87905	4.08309		1495.67	0.10153	0.1307	3501.46247	-16108	3501.46247	-67577		3501.46247	0.34123	0.34069	0.33969	0.33921	0.33854	0.33827	0.33733	0.3371	0.33655	0.33652	0.33377	0.33302	2154.30106	-8.273E-7	-1.3023E-6	-8.863E-7	-1.0198E-6	-9.417E-7	-7.327E-7	-6.898E-7	-8.485E-7	-8.312E-7	-1.0927E-6	-4.802E-7	-6.537E-7		1804.25125	4.32E-4	6.96E-4	1.36E-4	1733.85207	-2.25E-4	-3.28957E-4
			-0.18594	4.86484	4.04212		1496.63	0.10308	0.13324	3500.49814	-19301	3500.49814	-68438		3500.49814	0.3432	0.34266	0.34169	0.34119	0.34049	0.34023	0.33928	0.33905	0.33851	0.33847	0.33571	0.33495	2153.33673	-8.841E-7	-1.5502E-6	-7.566E-7	-1.3389E-6	-1.0979E-6	-1.1479E-6	-7.666E-7	-1.0247E-6	-5.617E-7	-1.2713E-6	-3.074E-7	-6.643E-7		1803.28692	6.53E-4	0.00103	1.39E-4	1732.88775	-2.09E-4	-3.35077E-4
			-0.1835	4.87153	4.04504		1497.6	0.10457	0.13568	3499.53382	-25381	3499.53382	-61724		3499.53382	0.34515	0.34462	0.34367	0.34314	0.34243	0.34217	0.34122	0.34099	0.34047	0.34043	0.33766	0.33688	2152.37241	-1.031E-6	-1.5376E-6	-6.706E-7	-1.3928E-6	-1.3085E-6	-1.2676E-6	-8.878E-7	-9.781E-7	-4.592E-7	-1.1982E-6	-5.059E-7	-8.281E-7		1802.3226	8.17E-4	0.00123	1.32E-4	1731.92343	-2.07E-4	-3.72358E-4
			-0.18106	4.89703	4.03459		1498.56	0.10603	0.13804	3498.56949	-32902	3498.56949	-57745		3498.56949	0.34709	0.34659	0.34562	0.34509	0.34436	0.34411	0.34318	0.34293	0.34242	0.34238	0.3396	0.33881	2151.40809	-1.2289E-6	-1.1836E-6	-6.824E-7	-1.2336E-6	-1.4223E-6	-1.0418E-6	-1.0661E-6	-7.66E-7	-5.805E-7	-9.241E-7	-9.643E-7	-1.1804E-6		1801.35827	8.43E-4	0.00119	1.28E-4	1730.95911	-2.09E-4	-4.03258E-4
			-0.17862	4.86149	4.04003		1499.52	0.10745	0.14033	3497.60517	-36600	3497.60517	-56570		3497.60517	0.34904	0.34855	0.34756	0.34703	0.34629	0.34604	0.34513	0.34489	0.34435	0.34434	0.34153	0.34075	2150.44376	-1.207E-6	-8.378E-7	-6.441E-7	-1.1556E-6	-1.1531E-6	-8.88E-7	-1.1808E-6	-8.319E-7	-6.573E-7	-8.686E-7	-1.2474E-6	-1.4057E-6		1800.39395	7.03E-4	9.39E-4	1.3E-4	1729.9948	-2.08E-4	-4.29244E-4
			-0.17618	4.87571	4.03919		1500.49	0.10889	0.1426	3496.64084	-33469	3496.64084	-52320		3496.64084	0.35099	0.3505	0.34948	0.34896	0.34822	0.34798	0.34708	0.34684	0.34629	0.34628	0.34343	0.34267															1799.42962	4.69E-4	6.08E-4	1.23E-4	1729.03048	-1.95E-4	-4.488E-4
			-0.17373	4.92378	4.01453		1501.45	0.1104	0.14494	3495.67652	-28294	3495.67652	-47471		3495.67652	0.35293	0.35243	0.35138	0.35088	0.35015	0.34994	0.34901	0.34876	0.34821	0.34819	0.34532	0.34457															1798.4653	2.52E-4	3.19E-4	1.06E-4	1728.06616	-1.73E-4	-4.22166E-4
			-0.17129	4.81383	4.02289		1502.42	0.11201	0.14742	3494.71219	-26989	3494.71219	-47515		3494.71219	0.35487	0.35436	0.35328	0.35282	0.35209	0.35188	0.35092	0.35066	0.35014	0.35012	0.34721	0.34647															1797.50097	1.04E-4	1.07E-4	9.5E-5	1727.10184	-1.61E-4	-3.528E-4
			-0.16885	4.89577	4.04922		1503.38	0.11371	0.15007	3493.74787	-29071	3493.74787	-52085		3493.74787	0.3568	0.35629	0.35521	0.35477	0.35401	0.35379	0.35284	0.35257	0.35206	0.35204	0.3491	0.34836															1796.53665	3E-6	-1.9E-5	8.9E-5	1726.13752	-1.64E-4	-2.75936E-4
			-0.16641	4.84979	3.99948		1504.35	0.11549	0.15291	3492.78354	-30776	3492.78354	-56779		3492.78354	0.35873	0.35821	0.35713	0.3567	0.35593	0.3557	0.35476	0.35448	0.35396	0.35395	0.35099	0.35024															1795.57232	-7.5E-5	-6.1E-5	8E-5	1725.17321	-1.65E-4	-2.01063E-4
			-0.16397	4.864	3.97899		1505.31	0.11737	0.15591	3491.81922	-29301	3491.81922	-59865		3491.81922	0.36064	0.36012	0.35904	0.35862	0.35783	0.35762	0.35667	0.3564	0.35584	0.35585	0.35289	0.35212															1794.608	-1.22E-4	-7.9E-5	7.6E-5	1724.20889	-1.51E-4	-1.33031E-4
			-0.16153	4.89577	4.03626		1506.27	0.11933	0.15906	3490.8549	-25127	3490.8549	-61517		3490.8549	0.36253	0.36203	0.36095	0.36053	0.35974	0.35954	0.35855	0.35831	0.35773	0.35775	0.35478	0.35399															1793.64368	-1.44E-4	-1.32E-4	8.5E-5	1723.24457	-1.21E-4	-6.93462E-5
			-0.15909	4.85731	4.03208		1507.24	0.12135	0.16236	3489.89057	-22318	3489.89057	-61329		3489.89057	0.36442	0.36392	0.36286	0.3624	0.36162	0.36143	0.36041	0.3602	0.35962	0.35963	0.35664	0.35586															1792.67935	-1.64E-4	-2.18E-4	9.7E-5	1722.28025	-8.2E-5	-7.3802E-6
			-0.15664	4.90121	4.07514		1508.2	0.12342	0.16577	3488.92625	-24548	3488.92625	-61536		3488.92625	0.3663	0.3658	0.36475	0.36427	0.36348	0.36328	0.36229	0.36207	0.3615	0.36148	0.35848	0.35771															1791.71503	-1.84E-4	-3.1E-4	1.08E-4	1721.31593	-6.2E-5	6.9544E-6
			-0.1542	4.93256	4.0371		1509.17	0.12554	0.16929	3487.96192	-29441	3487.96192	-64289		3487.96192	0.36818	0.36768	0.36663	0.36614	0.36535	0.36513	0.36417	0.36393	0.36336	0.36334	0.36033	0.35955															1790.7507	-2.1E-4	-4.04E-4	1.1E-4	1720.35161	-8.6E-5	-8.45788E-5
			-0.15176	4.86107	4.0509		1510.13	0.1277	0.1729	3486.9976	-31612	3486.9976	-67445		3486.9976	0.37006	0.36955	0.36851	0.36801	0.36723	0.36699	0.36601	0.3658	0.36522	0.36522	0.36218	0.36139															1789.78638	-2.54E-4	-4.72E-4	9.6E-5	1719.3873	-1.58E-4	-3.00406E-4
			-0.14932	4.95221	4.08016		1511.1	0.1299	0.17658	3486.03327	-31461	3486.03327	-67616		3486.03327	0.37193	0.37142	0.37037	0.36988	0.36911	0.36885	0.36785	0.36767	0.36708	0.3671	0.36403	0.36325															1788.82205	-2.87E-4	-4.77E-4	7.8E-5	1718.42298	-2.65E-4	-6.13269E-4
			-0.14688	4.90873	3.99237		1512.06	0.13211	0.18032	3485.06895	-32931	3485.06895	-66401		3485.06895	0.3738	0.37327	0.37223	0.37174	0.37096	0.3707	0.36971	0.36951	0.36893	0.36895	0.36587	0.3651															1787.85773	-2.8E-4	-4.33E-4	6.6E-5	1717.45866	-3.8E-4	-9.54511E-4
			-0.14444	4.87696	3.99989		1513.03	0.13432	0.18406	3484.10462	-34272	3484.10462	-66703		3484.10462	0.37566	0.37512	0.37408	0.3736	0.3728	0.37254	0.37155	0.37133	0.37076	0.37079	0.3677	0.36694															1786.8934	-2.51E-4	-3.57E-4	7.2E-5	1716.49434	-4.74E-4	-0.00125
			-0.142	4.98774	4.05717		1513.99	0.13651	0.18768	3483.1403	-31952	3483.1403	-64883		3483.1403	0.37749	0.37698	0.37593	0.37544	0.37463	0.37439	0.37339	0.37314	0.37258	0.37262	0.36953	0.36876															1785.92908	-2.15E-4	-2.72E-4	9.3E-5	1715.53002	-5.39E-4	-0.00146
			-0.13955	4.96642	4.03961		1514.95	0.13867	0.19109	3482.17597	-29738	3482.17597	-56258		3482.17597	0.37931	0.37881	0.37774	0.37725	0.37645	0.37624	0.3752	0.37497	0.37442	0.37444	0.37134	0.37057															1784.96475	-1.68E-4	-2.15E-4	1.05E-4	1714.5657	-5.57E-4	-0.00153
			-0.13711	4.92378	4.05048		1515.92	0.14079	0.19421	3481.21165	-32901	3481.21165	-45578		3481.21165	0.38113	0.38062	0.37953	0.37906	0.37826	0.37807	0.37701	0.3768	0.37624	0.37626	0.37313	0.37236															1784.00043	-1.29E-4	-1.88E-4	1E-4	1713.60139	-5.31E-4	-0.00148
			-0.13467	5.02913	4.04671		1516.88	0.14287	0.19701	3480.24733	-40398	3480.24732	-43932		3480.24733	0.38293	0.38243	0.38132	0.38087	0.38005	0.37986	0.37882	0.37862	0.37803	0.37806	0.3749	0.37414															1783.03611	-1.12E-4	-1.58E-4	8.7E-5	1712.63707	-5E-4	-0.00136
			-0.13223	4.97437	4.058		1517.85	0.14489	0.19958	3479.283	-47714	3479.283	-54594		3479.283	0.38474	0.38423	0.38312	0.38268	0.38184	0.38164	0.38062	0.38041	0.37982	0.37984	0.37668	0.3759															1782.07178	-1.05E-4	-1.25E-4	7.1E-5	1711.67275	-4.72E-4	-0.00123
			-0.12979	4.97144	4.01034		1518.81	0.14688	0.20203	3478.31868	-50356	3478.31868	-72546		3478.31868	0.38655	0.38603	0.38493	0.38447	0.38362	0.38343	0.38243	0.3822	0.38161	0.38163	0.37847	0.37765															1781.10746	-1.01E-4	-1.1E-4	5.8E-5	1710.70843	-4.21E-4	-0.00109
			-0.12735	4.97395	4.06636		1519.78	0.14887	0.20448	3477.35435	-47229	3477.35435	-93287		3477.35435	0.38837	0.38781	0.38673	0.38625	0.3854	0.38521	0.38423	0.38399	0.38337	0.38341	0.38024	0.3794															1780.14313	-1.05E-4	-1.05E-4	6.3E-5	1709.74411	-3.61E-4	-9.38914E-4
			-0.12491	4.96517	4.109		1520.74	0.15087	0.207	3476.39003	-40279	3476.39003	-109406		3476.39003	0.39017	0.38959	0.38854	0.38803	0.38717	0.38698	0.38598	0.38576	0.38512	0.38516	0.38201	0.38116															1779.17881	-1.07E-4	-9.7E-5	8.8E-5	1708.77979	-3.18E-4	-8.13393E-4
			-0.12246	5.00154	4.12405		1521.7	0.15289	0.20965	3475.4257	-32401	3475.4257	-112968		3475.4257	0.39196	0.39136	0.39033	0.38981	0.38893	0.38875	0.38772	0.38752	0.38688	0.3869	0.38375	0.38291															1778.21448	-1.03E-4	-8.6E-5	1.11E-4	1707.81548	-2.86E-4	-7.36494E-4
			-0.12002	4.97813	4.06678		1522.67	0.15492	0.21238	3474.46138	-30545	3474.46138	-104419		3474.46138	0.39372	0.39312	0.39209	0.39157	0.39068	0.3905	0.38946	0.38927	0.38862	0.38864	0.38545	0.38463															1777.25016	-8.9E-5	-8.2E-5	1.21E-4	1706.85116	-2.54E-4	-6.60289E-4
			-0.11758	5.03038	4.09312		1523.63	0.15694	0.21517	3473.49705	-37869	3473.49705	-91168		3473.49705	0.39543	0.39486	0.39382	0.39329	0.39241	0.39225	0.39119	0.391	0.39033	0.39037	0.38713	0.38634															1776.28583	-7.2E-5	-9E-5	1.23E-4	1705.88684	-2.23E-4	-5.37928E-4
			-0.11514	5.02495	4.16711		1524.6	0.15896	0.21802	3472.53273	-44081	3472.53273	-80539		3472.53273	0.39714	0.39659	0.39554	0.395	0.39413	0.39396	0.39292	0.39271	0.39204	0.39208	0.38883	0.38804															1775.32151	-7.6E-5	-9.8E-5	1.29E-4	1704.92252	-1.93E-4	-3.67654E-4
			-0.1127	5.02286	4.11737		1525.56	0.16098	0.22093	3471.5684	-42092	3471.5684	-73815		3471.5684	0.39888	0.39832	0.39726	0.39671	0.39586	0.39565	0.39463	0.39441	0.39374	0.39379	0.39052	0.38976															1774.35718	-1.13E-4	-9.2E-5	1.37E-4	1703.9582	-1.5E-4	-1.69524E-4
			-0.11026	5.05839	4.1274		1526.53	0.163	0.22388	3470.60408	-38409	3470.60408	-68615		3470.60408	0.4006	0.40003	0.39896	0.39842	0.39758	0.39733	0.39634	0.3961	0.39543	0.3955	0.39219	0.39144															1773.39286	-1.39E-4	-7.7E-5	1.3E-4	1702.99389	-7.8E-5	1.48342E-5
			-0.10782	5.01032	4.10608		1527.49	0.16504	0.22687	3469.63976	-36783	3469.63975	-66415		3469.63976	0.40227	0.40172	0.40064	0.40011	0.39927	0.39901	0.39802	0.39778	0.39711	0.39718	0.39387	0.3931															1772.42854	-1.24E-4	-7E-5	1.13E-4	1702.02957	-7E-6	1.6895E-4
			-0.10537	5.11985	4.15206		1528.45	0.1671	0.22993	3468.67543	-36005	3468.67543	-70069		3468.67543	0.40391	0.40339	0.4023	0.40181	0.40094	0.40071	0.39968	0.39946	0.39879	0.39885	0.39557	0.39474															1771.46421	-9.4E-5	-8.2E-5	1.03E-4	1701.06525	1.5E-5	2.84941E-4
			-0.10293	5.09058	4.12698		1529.42	0.16918	0.23305	3467.71111	-40389	3467.71111	-77095		3467.71111	0.4056	0.40507	0.40398	0.40351	0.40261	0.4024	0.40131	0.40112	0.40047	0.40052	0.39724	0.3964															1770.49989	-8.1E-5	-9.5E-5	9.5E-5	1700.10093	-1.8E-5	2.97274E-4
			-0.10049	5.06508	4.16586		1530.38	0.1713	0.23622	3466.74678	-51147	3466.74678	-87004		3466.74678	0.4073	0.40676	0.40565	0.40518	0.40428	0.40406	0.40296	0.40277	0.40214	0.40218	0.39887	0.39806															1769.53556	-9.3E-5	-8.6E-5	8.4E-5	1699.13661	-8.9E-5	1.54936E-4
			-0.09805	5.14577	4.20181		1531.35	0.17348	0.23945	3465.78246	-59050	3465.78246	-102485		3465.78246	0.40898	0.40844	0.40731	0.40681	0.40594	0.4057	0.40462	0.40442	0.4038	0.4038	0.40048	0.39971															1768.57124	-1E-4	-6.3E-5	8.9E-5	1698.17229	-1.88E-4	-9.53709E-5
			-0.09561	5.08348	4.24153		1532.31	0.17567	0.2427	3464.81813	-59237	3464.81813	-115917		3464.81813	0.41063	0.4101	0.40895	0.40843	0.40759	0.40734	0.40629	0.40607	0.40543	0.40541	0.4021	0.40134															1767.60691	-9.2E-5	-5.9E-5	1.05E-4	1697.20798	-2.99E-4	-3.5776E-4
			-0.09317	5.12612	4.28751		1533.28	0.17784	0.2459	3463.85381	-56962	3463.85381	-118793		3463.85381	0.41226	0.41175	0.41057	0.41006	0.40921	0.40897	0.40793	0.40768	0.40705	0.40702	0.40371	0.40293															1766.64259	-8.7E-5	-8.8E-5	1.07E-4	1696.24366	-3.96E-4	-5.74079E-4
			-0.09073	5.16207	4.26285		1534.24	0.17996	0.24898	3462.88948	-54020	3462.88948	-118462		3462.88948	0.41387	0.41338	0.41218	0.41169	0.41081	0.41056	0.40954	0.40928	0.40863	0.40867	0.40533	0.4045															1765.67826	-9E-5	-1.18E-4	9.2E-5	1695.27934	-4.53E-4	-7.27011E-4
			-0.08828	5.19593	4.24445		1535.2	0.182	0.25186	3461.92516	-49423	3461.92516	-124957		3461.92516	0.41547	0.41497	0.41377	0.41328	0.41239	0.41214	0.41112	0.41086	0.41021	0.4103	0.40693	0.40606															1764.71394	-8.9E-5	-1.21E-4	8.1E-5	1694.31502	-4.8E-4	-7.95061E-4
			-0.08584	5.20638	4.20557		1536.17	0.18387	0.25441	3460.96083	-48185	3460.96083	-134064		3460.96083	0.41706	0.41653	0.41535	0.41485	0.41395	0.41373	0.41269	0.41242	0.4118	0.41188	0.40848	0.40763															1763.74961	-7.9E-5	-1.05E-4	7.3E-5	1693.3507	-5.12E-4	-7.87107E-4
			-0.0834	5.12946	4.27539		1537.13	0.18551	0.25656	3459.99651	-55667	3459.99651	-133287		3459.99651	0.41864	0.41809	0.41695	0.41642	0.4155	0.41529	0.41428	0.41396	0.41338	0.41342	0.41001	0.40919															1762.78529	-7.5E-5	-7.8E-5	6.7E-5	1692.38638	-5.61E-4	-7.59452E-4
			-0.08096	5.21349	4.24571		1538.1	0.1869	0.25823	3459.03219	-71963	3459.03218	-120884		3459.03219	0.42021	0.41966	0.41854	0.41801	0.41707	0.41684	0.41585	0.4155	0.41491	0.41496	0.41155	0.41074															1761.82097	-8.5E-5	-5.3E-5	6.7E-5	1691.42207	-6.05E-4	-7.38331E-4
			-0.07852	5.24944	4.28542		1539.06	0.18795	0.25933	3458.06786	-90909	3458.06786	-108476		3458.06786	0.42175	0.42121	0.42007	0.41957	0.41864	0.41836	0.41741	0.41705	0.41641	0.41649	0.4131	0.41229															1760.85664	-1.02E-4	-4.4E-5	7.2E-5	1690.45775	-6.28E-4	-7.07197E-4
			-0.07608	5.23356	4.33935		1540.03	0.18866	0.25982	3457.10354	-102382	3457.10354	-104706		3457.10354	0.42327	0.42273	0.42157	0.42112	0.42018	0.41988	0.41893	0.41861	0.41793	0.418	0.41463	0.41381															1759.89232	-1.06E-4	-3.9E-5	8.2E-5	1689.49343	-6.32E-4	-6.62218E-4
			-0.07364	5.20973	4.33015		1540.99	0.18902	0.25974	3456.13921	-101516	3456.13921	-109494		3456.13921	0.42479	0.42423	0.4231	0.42264	0.42169	0.42142	0.42044	0.42013	0.41946	0.41952	0.41613	0.41532															1758.92799	-9.9E-5	-2.9E-5	9.8E-5	1688.52911	-6.25E-4	-6.13499E-4
			-0.07119	5.32511	4.33266		1541.95	0.18905	0.25914	3455.17489	-90525	3455.17489	-119743		3455.17489	0.42632	0.42575	0.42463	0.42413	0.42319	0.42295	0.42194	0.42163	0.42098	0.42102	0.41762	0.41682															1757.96367	-1.01E-4	-2.7E-5	1.09E-4	1687.56479	-6.03E-4	-5.68317E-4
			-0.06875	5.2022	4.39161		1542.92	0.18877	0.25804	3454.21056	-74327	3454.21056	-126505		3454.21056	0.42782	0.42727	0.42614	0.4256	0.42469	0.42445	0.42342	0.42313	0.42246	0.4225	0.4191	0.4183															1756.99934	-1.08E-4	-4.2E-5	9.9E-5	1686.60047	-5.66E-4	-5.22146E-4
			-0.06631	5.28498	4.43926		1543.88	0.18823	0.25654	3453.24624	-60714	3453.24624	-120284		3453.24624	0.42927	0.42877	0.4276	0.42707	0.42618	0.42592	0.4249	0.42463	0.42391	0.42396	0.42055	0.41975															1756.03502	-1.05E-4	-6.1E-5	8.1E-5	1685.63616	-5.51E-4	-4.73024E-4
			-0.06387	5.31508	4.50113		1544.85	0.18751	0.25471	3452.28191	-54108	3452.28191	-105293		3452.28191	0.43072	0.43025	0.42905	0.42854	0.42765	0.42739	0.42635	0.42609	0.42538	0.42541	0.42201	0.42119															1755.07069	-1.04E-4	-6.7E-5	7.1E-5	1684.67184	-5.79E-4	-4.42692E-4
			-0.06143	5.24944	4.38826		1545.81	0.18664	0.25261	3451.31759	-50332	3451.31759	-92665		3451.31759	0.4322	0.43169	0.43049	0.43002	0.42908	0.42885	0.42777	0.42752	0.42684	0.42686	0.42346	0.42263															1754.10637	-1.15E-4	-6.1E-5	6.7E-5	1683.70752	-6.26E-4	-4.43812E-4
			-0.05899	5.38155	4.40038		1546.78	0.18564	0.25028	3450.35326	-46505	3450.35326	-85461		3450.35326	0.43369	0.43312	0.43193	0.43145	0.43049	0.4303	0.42918	0.42894	0.42829	0.4283	0.42489	0.42406															1753.14204	-1.21E-4	-6.3E-5	6.4E-5	1682.7432	-6.66E-4	-4.53902E-4
			-0.06143	4.55423	3.74154		1547.74	0.18459	0.24782	3449.38894	-47397	3449.38894	-79574		3449.38894	0.43513	0.43454	0.43336	0.43286	0.43192	0.43173	0.4306	0.43037	0.42972	0.42973	0.4263	0.42548															1752.17772	-1.23E-4	-7.7E-5	6.4E-5	1681.77888	-6.95E-4	-4.47994E-4
			-0.06387	4.0764	3.35275		1548.71	0.18348	0.24526	3448.42462	-56039	3448.42461	-74643		3448.42462	0.43653	0.43597	0.43479	0.43426	0.43337	0.43314	0.43204	0.43179	0.43114	0.43115	0.42768	0.42687															1751.2134	-1.3E-4	-8.4E-5	6.4E-5	1680.81456	-7.16E-4	-4.28873E-4
			-0.06631	3.69555	2.94599		1549.67	0.18233	0.24258	3447.46029	-66705	3447.46029	-75489		3447.46029	0.43791	0.4374	0.43619	0.43567	0.43479	0.43451	0.43344	0.43319	0.43254	0.43254	0.42906	0.42823															1750.24907	-1.34E-4	-8.1E-5	5.3E-5	1679.85025	-7.05E-4	-3.93398E-4
			-0.06875	3.34314	2.75996		1550.63	0.18114	0.2398	3446.49597	-75922	3446.49597	-79937		3446.49597	0.43929	0.43878	0.43757	0.43706	0.43615	0.43588	0.43481	0.43456	0.4339	0.4339	0.43044	0.42959															1749.28475	-1.22E-4	-8.4E-5	3.3E-5	1678.88593	-6.54E-4	-3.20706E-4
			-0.07119	3.15627	2.47945		1551.6	0.17993	0.23696	3445.53164	-89597	3445.53164	-81965		3445.53164	0.44066	0.44015	0.43895	0.43842	0.4375	0.43726	0.43617	0.43591	0.43526	0.43524	0.43181	0.43095															1748.32042	-1.06E-4	-8.8E-5	2.6E-5	1677.92161	-5.93E-4	-2.02438E-4
							1552.56	0.1787	0.23409	3444.56732	-110000	3444.56732	-84769		3444.56732	0.44207	0.44154	0.44033	0.43978	0.43884	0.43865	0.43753	0.43728	0.43661	0.43661	0.43317	0.43233															1747.3561	-9.6E-5	-8.9E-5	4.7E-5	1676.95729	-5.29E-4	-4.48914E-5
							1553.53	0.17747	0.2312	3443.60299	-128466	3443.60299	-96270		3443.60299	0.44347	0.44291	0.44169	0.44115	0.4402	0.44002	0.43886	0.43865	0.43797	0.43797	0.43454	0.4337															1746.39177	-8.5E-5	-8.4E-5	7.4E-5	1675.99297	-4.59E-4	1.18077E-4
							1554.49	0.17624	0.22833	3442.63867	-132979	3442.63867	-116134		3442.63867	0.44483	0.44426	0.44302	0.44252	0.44156	0.44136	0.44019	0.44	0.43931	0.4393	0.43588	0.43504															1745.42745	-7.8E-5	-7.7E-5	8E-5	1675.02866	-4.11E-4	2.34926E-4
							1555.46	0.17503	0.22549	3441.67434	-120925	3441.67434	-134950		3441.67434	0.44615	0.44559	0.44435	0.44386	0.44291	0.44266	0.44151	0.44132	0.44063	0.44061	0.4372	0.43637															1744.46312	-8.4E-5	-8.5E-5	7.7E-5	1674.06434	-3.94E-4	2.73089E-4
							1556.42	0.17384	0.22268	3440.71002	-101842	3440.71002	-144032		3440.71002	0.44746	0.4469	0.44568	0.44516	0.44425	0.44396	0.44282	0.44262	0.44194	0.44193	0.43849	0.43768															1743.4988	-8.5E-5	-9.7E-5	8.2E-5	1673.10002	-3.78E-4	2.62413E-4
							1557.38	0.17271	0.21997	3439.74569	-85967	3439.74569	-144759		3439.74569	0.44878	0.44821	0.447	0.44645	0.44555	0.44524	0.44412	0.44389	0.44323	0.44323	0.43976	0.43893															1742.53447	-7.5E-5	-9.3E-5	8.5E-5	1672.1357	-3.55E-4	2.90659E-4
							1558.35	0.17163	0.21738	3438.78137	-78865	3438.78137	-144856		3438.78137	0.45007	0.4495	0.44829	0.44773	0.44681	0.44651	0.4454	0.44515	0.44451	0.44449	0.44104	0.44017															1741.57015	-7.2E-5	-8.1E-5	8.9E-5	1671.17138	-3.41E-4	3.64515E-4
							1559.31	0.17057	0.21489	3437.81704	-80877	3437.81704	-143565		3437.81704	0.45132	0.45078	0.44954	0.44899	0.44804	0.44779	0.44666	0.44643	0.44577	0.44576	0.44231	0.44141															1740.60583	-8.3E-5	-7E-5	1.01E-4	1670.20706	-3.54E-4	3.91667E-4
							1560.28	0.16955	0.21253	3436.85272	-85109	3436.85272	-132916		3436.85272	0.45258	0.45204	0.45076	0.45021	0.44929	0.44908	0.44791	0.44772	0.44702	0.44702	0.44356	0.44266															1739.6415	-1.02E-4	-5.2E-5	1E-4	1669.24275	-4.04E-4	3.5764E-4
							1561.24	0.16859	0.21032	3435.8884	-87194	3435.8884	-111218		3435.8884	0.45383	0.45327	0.45201	0.45144	0.45054	0.45034	0.44915	0.44897	0.44825	0.44827	0.44477	0.4439															1738.67718	-1.12E-4	-3.5E-5	6.7E-5	1668.27843	-4.68E-4	3.31521E-4
							1562.21	0.16768	0.20824	3434.92407	-92615	3434.92407	-89748		3434.92407	0.45505	0.45448	0.45327	0.4527	0.45176	0.45157	0.45037	0.45018	0.44946	0.44951	0.44598	0.44512															1737.71285	-1.05E-4	-3.7E-5	2.9E-5	1667.31411	-5.31E-4	3.16076E-4
							1563.17	0.16681	0.2063	3433.95975	-103824	3433.95975	-85194		3433.95975	0.45626	0.45569	0.4545	0.45396	0.45295	0.45277	0.45158	0.45138	0.45064	0.45072	0.44721	0.44634															1736.74853	-1.02E-4	-3.6E-5	2.4E-5	1666.34979	-6.02E-4	2.65367E-4
							1564.13	0.166	0.20452	3432.99542	-115617	3432.99542	-100219		3432.99542	0.45745	0.45691	0.45568	0.45521	0.45416	0.45394	0.45278	0.45257	0.45181	0.45189	0.44843	0.44754															1735.7842	-1.14E-4	-5E-6	4.3E-5	1665.38547	-6.63E-4	1.93573E-4
							1565.1	0.16525	0.20286	3432.0311	-126470	3432.0311	-124134		3432.0311	0.45866	0.45815	0.45686	0.45643	0.45538	0.45511	0.45398	0.45375	0.45298	0.45307	0.4496	0.44873															1734.81988	-1.24E-4	2E-5	5E-5	1664.42115	-6.99E-4	1.51074E-4
							1566.06	0.16456	0.20132	3431.06677	-137449	3431.06677	-145424		3431.06677	0.45988	0.45935	0.45804	0.4576	0.45659	0.45629	0.45518	0.45493	0.45417	0.45424	0.45076	0.4499															1733.85555	-1.24E-4	-4E-6	4.1E-5	1663.45684	-7.33E-4	1.49969E-4
							1567.03	0.16393	0.1999	3430.10245	-146667	3430.10245	-154573		3430.10245	0.46106	0.46051	0.45922	0.45875	0.45777	0.45748	0.45634	0.4561	0.45536	0.4554	0.45194	0.45105															1732.89123	-1.15E-4	-5.3E-5	3.4E-5	1662.49252	-7.61E-4	1.7649E-4
							1567.99	0.16336	0.19861	3429.13812	-151070	3429.13812	-149628		3429.13812	0.46221	0.46165	0.46039	0.45989	0.45893	0.45865	0.45747	0.45725	0.4565	0.45655	0.45311	0.4522															1731.9269	-1.05E-4	-6.5E-5	3.3E-5	1661.5282	-7.55E-4	2.29968E-4
							1568.96	0.16281	0.19742	3428.1738	-147771	3428.1738	-137303		3428.1738	0.46335	0.46277	0.46154	0.46101	0.46005	0.45979	0.4586	0.45836	0.45762	0.45769	0.45422	0.45333															1730.96258	-9.9E-5	-3.6E-5	4.2E-5	1660.56388	-7.03E-4	2.94134E-4
							1569.92	0.16232	0.19634	3427.20947	-137659	3427.20947	-125779		3427.20947	0.46448	0.46388	0.46267	0.46211	0.46113	0.46091	0.45973	0.45944	0.45875	0.45881	0.4553	0.45444															1729.99826	-9.6E-5	-2E-5	5.4E-5	1659.59956	-6.31E-4	3.4425E-4
							1570.88	0.16191	0.19539	3426.24515	-129264	3426.24515	-118418		3426.24515	0.46558	0.46502	0.46377	0.46322	0.4622	0.46201	0.46085	0.46055	0.45987	0.45991	0.4564	0.45555															1729.03393	-9.7E-5	-3E-5	5.4E-5	1658.63524	-5.67E-4	4.06051E-4
							1571.85	0.16154	0.19453	3425.28083	-131368	3425.28083	-112930		3425.28083	0.46666	0.46615	0.46483	0.46432	0.46329	0.46309	0.46195	0.46169	0.46096	0.46098	0.45746	0.45663															1728.06961	-1.05E-4	-3.5E-5	5.1E-5	1657.67093	-4.95E-4	4.97428E-4
							1572.81	0.16124	0.19376	3424.3165	-144341	3424.3165	-111519		3424.3165	0.46774	0.46725	0.46588	0.46539	0.46438	0.46418	0.46301	0.4628	0.46204	0.46206	0.45851	0.4577															1727.10528	-1.11E-4	-2.6E-5	5.6E-5	1656.70661	-3.94E-4	5.87817E-4
							1573.78	0.16102	0.19311	3423.35218	-161814	3423.35218	-124844		3423.35218	0.46883	0.46831	0.46693	0.46644	0.46546	0.46525	0.46405	0.46382	0.4631	0.46312	0.45957	0.45876															1726.14096	-1.12E-4	-2.3E-5	7.1E-5	1655.74229	-2.93E-4	6.49077E-4
							1574.74	0.16088	0.19257	3422.38785	-177789	3422.38785	-152618		3422.38785	0.46989	0.46934	0.46797	0.46746	0.46651	0.46631	0.46507	0.46484	0.46413	0.46415	0.46062	0.45981															1725.17663	-1.05E-4	-3.2E-5	8.2E-5	1654.77797	-2.46E-4	6.55868E-4
							1575.71	0.16079	0.19212	3421.42353	-190963	3421.42353	-176252		3421.42353	0.4709	0.47034	0.469	0.46848	0.46752	0.46733	0.46609	0.46587	0.46513	0.46516	0.46165	0.46084															1724.21231	-9.9E-5	-3.9E-5	7E-5	1653.81365	-2.96E-4	6.04764E-4
							1576.67	0.16078	0.19175	3420.4592	-202400	3420.4592	-186495		3420.4592	0.47191	0.47133	0.47005	0.46951	0.46853	0.46833	0.46711	0.46689	0.46613	0.46619	0.46268	0.46185															1723.24798	-1.09E-4	-3.7E-5	3.8E-5	1652.84934	-4.4E-4	5.31287E-4
							1577.63	0.16086	0.19151	3419.49488	-211442	3419.49488	-191713		3419.49488	0.47292	0.47236	0.47108	0.47055	0.46953	0.46933	0.46814	0.46788	0.46713	0.46721	0.46372	0.46285															1722.28366	-1.31E-4	-2.9E-5	2.1E-5	1651.88502	-5.72E-4	4.6758E-4
							1578.6	0.16103	0.19138	3418.53055	-215014	3418.53055	-193743		3418.53055	0.47393	0.47338	0.47205	0.47156	0.47052	0.47031	0.46914	0.46885	0.46811	0.46819	0.46472	0.46383															1721.31933	-1.4E-4	-2.4E-5	3.6E-5	1650.9207	-5.91E-4	4.13164E-4
							1579.56	0.16128	0.19135	3417.56623	-214652	3417.56623	-183999		3417.56623	0.47489	0.47434	0.47299	0.4725	0.47151	0.47128	0.4701	0.46981	0.46907	0.46917	0.46567	0.4648															1720.35501	-1.26E-4	-1.7E-5	4.4E-5	1649.95638	-5.56E-4	3.57832E-4
							1580.53	0.16164	0.19144	3416.6019	-215295	3416.6019	-164133		3416.6019	0.47582	0.47527	0.47394	0.47342	0.47247	0.47223	0.47102	0.47075	0.47002	0.47013	0.46661	0.46576															1719.39068	-1.07E-4	3E-6	2.4E-5	1648.99206	-5.56E-4	3.3189E-4
							1581.49	0.16208	0.19165	3415.63758	-213933	3415.63758	-149846		3415.63758	0.47675	0.47622	0.47491	0.47434	0.4734	0.47315	0.47193	0.47168	0.47095	0.47105	0.46755	0.4667															1718.42636	-9.2E-5	2.7E-5	9E-6	1648.02774	-5.62E-4	3.51434E-4
							1582.46	0.16261	0.19197	3414.67326	-207828	3414.67326	-146806		3414.67326	0.47769	0.47714	0.47584	0.47527	0.4743	0.47408	0.47285	0.47259	0.47187	0.47195	0.46846	0.4676															1717.46204	-6.7E-5	4.2E-5	1.9E-5	1647.06343	-5.38E-4	3.74042E-4
							1583.42	0.16322	0.19241	3413.70893	-201424	3413.70893	-147045		3413.70893	0.4786	0.47804	0.4767	0.47617	0.47518	0.475	0.47375	0.47349	0.47278	0.47284	0.46935	0.46848															1716.49771	-4.7E-5	4E-5	3.1E-5	1646.09911	-5.12E-4	3.92904E-4
							1584.39	0.16395	0.19298	3412.74461	-195585	3412.74461	-151096		3412.74461	0.47947	0.47892	0.47756	0.47706	0.47606	0.47588	0.47462	0.47439	0.47369	0.47373	0.47024	0.46938															1715.53339	-6.3E-5	1.2E-5	2.7E-5	1645.13479	-5.06E-4	4.20162E-4
							1585.35	0.16478	0.19366	3411.78028	-190424	3411.78028	-162350		3411.78028	0.48033	0.47978	0.47844	0.47794	0.47695	0.47672	0.47549	0.47528	0.47456	0.47461	0.47113	0.47028															1714.56906	-1.01E-4	-3.3E-5	1.9E-5	1644.17047	-5.43E-4	4.26243E-4
							1586.31	0.16572	0.19449	3410.81596	-191247	3410.81596	-168839		3410.81596	0.48119	0.48065	0.47933	0.47879	0.47779	0.47755	0.47635	0.47615	0.47539	0.47548	0.472	0.47116															1713.60474	-1.31E-4	-6.8E-5	2.1E-5	1643.20615	-6.02E-4	4.13357E-4
							1587.28	0.1668	0.19552	3409.85163	-198414	3409.85163	-161609		3409.85163	0.48202	0.48151	0.48019	0.47961	0.47858	0.47837	0.47719	0.47697	0.47619	0.47631	0.47283	0.47198															1712.64041	-1.36E-4	-6.4E-5	3.4E-5	1642.24183	-5.94E-4	4.19592E-4
							1588.24	0.16801	0.19674	3408.88731	-205328	3408.88731	-154725		3408.88731	0.48283	0.48233	0.48099	0.48042	0.47938	0.47918	0.478	0.47776	0.47697	0.4771	0.47363	0.47278															1711.67609	-1.09E-4	-1.1E-5	4.5E-5	1641.27752	-5.04E-4	4.52474E-4
							1589.21	0.16939	0.19816	3407.92298	-210977	3407.92298	-161822		3407.92298	0.48363	0.48312	0.48178	0.48121	0.4802	0.47999	0.47879	0.47855	0.47777	0.47786	0.47445	0.4736															1710.71176	-6.5E-5	6.7E-5	4E-5	1640.3132	-3.95E-4	4.89313E-4
							1590.17	0.17096	0.19983	3406.95866	-219705	3406.95866	-176801		3406.95866	0.48442	0.48389	0.48258	0.482	0.48102	0.48077	0.47958	0.47935	0.47858	0.47863	0.47526	0.47441															1709.74744	-2.9E-5	1.28E-4	2.6E-5	1639.34888	-2.95E-4	5.0785E-4
							1591.14	0.1727	0.20177	3405.99433	-226924	3405.99433	-186501		3405.99433	0.4852	0.48464	0.48334	0.48276	0.4818	0.48151	0.48036	0.48011	0.47937	0.47939	0.47604	0.47519															1708.78311	-2E-6	1.45E-4	1.7E-5	1638.38456	-2.38E-4	5.15084E-4
							1592.1	0.17459	0.20393	3405.03001	-222702	3405.03001	-186845		3405.03001	0.48596	0.48537	0.48407	0.48351	0.48254	0.48221	0.4811	0.48083	0.48011	0.48012	0.47678	0.47596															1707.81879	3E-6	1.4E-4	2E-5	1637.42024	-2.63E-4	5.19269E-4
							1593.06	0.17667	0.20631	3404.06569	-209207	3404.06568	-185641		3404.06569	0.48668	0.48608	0.48477	0.48424	0.48327	0.48292	0.4818	0.48154	0.48083	0.48085	0.4775	0.4767															1706.85447	-1.9E-5	1.43E-4	2.4E-5	1636.45592	-3.1E-4	4.95446E-4
							1594.03	0.17895	0.20892	3403.10136	-199134	3403.10136	-183622		3403.10136	0.48737	0.48678	0.48546	0.48496	0.48397	0.48366	0.48249	0.48223	0.48153	0.48158	0.47821	0.4774															1705.89014	-5.1E-5	1.42E-4	1.6E-5	1635.49161	-3.1E-4	4.44827E-4
							1594.99	0.18142	0.21172	3402.13704	-199504	3402.13704	-175381		3402.13704	0.48805	0.48746	0.48615	0.48564	0.48466	0.48438	0.48318	0.48291	0.48222	0.48228	0.47891	0.47808															1704.92582	-8.1E-5	1.1E-4	3E-6	1634.52729	-3.22E-4	4.08531E-4
							1595.96	0.18406	0.21473	3401.17271	-205763	3401.17271	-166790		3401.17271	0.48872	0.48816	0.48684	0.48629	0.48534	0.48506	0.48386	0.48359	0.4829	0.48294	0.4796	0.47876															1703.96149	-9.6E-5	7.5E-5	3E-6	1633.56297	-3.84E-4	4.01144E-4
							1596.92	0.18689	0.21797	3400.20839	-212246	3400.20839	-159017		3400.20839	0.4894	0.48885	0.48749	0.48692	0.48599	0.4857	0.4845	0.48427	0.48354	0.48358	0.48027	0.47945															1702.99717	-8.3E-5	8.8E-5	-2E-6	1632.59865	-4.11E-4	3.9893E-4
							1597.89	0.18988	0.22142	3399.24406	-219579	3399.24406	-142980		3399.24406	0.49006	0.48948	0.48812	0.48757	0.4866	0.48634	0.48511	0.48491	0.48415	0.48421	0.48093	0.48012															1702.03284	-6E-5	1.27E-4	-1.6E-5	1631.63433	-3.82E-4	3.81051E-4
							1598.85	0.19305	0.22504	3398.27974	-227182	3398.27974	-126264		3398.27974	0.49069	0.49008	0.48874	0.48821	0.48721	0.48696	0.48573	0.48551	0.48475	0.48483	0.48158	0.48076															1701.06852	-5.3E-5	1.49E-4	-1.4E-5	1630.67001	-3.44E-4	3.54134E-4
							1599.81	0.19641	0.22888	3397.31541	-232242	3397.31541	-126735		3397.31541	0.4913	0.49069	0.48936	0.48883	0.48784	0.48755	0.48636	0.48611	0.48538	0.48545	0.48222	0.48138															1700.10419	-4.7E-5	1.65E-4	-2E-6	1629.7057	-3.07E-4	3.31331E-4
							1600.78	0.19997	0.23294	3396.35109	-237400	3396.35109	-141888		3396.35109	0.49192	0.4913	0.48998	0.48943	0.48846	0.48812	0.48699	0.48672	0.48601	0.48609	0.48283	0.48201															1699.13987	-1.2E-5	2.03E-4	4E-6	1628.74138	-2.84E-4	3.19447E-4
							1601.74	0.20368	0.23722	3395.38676	-244736	3395.38676	-153725		3395.38676	0.49252	0.4919	0.49058	0.49003	0.48905	0.4887	0.48759	0.48731	0.48664	0.48672	0.48343	0.48261															1698.17554	5.3E-5	2.72E-4	1.4E-5	1627.77706	-3.02E-4	3.13467E-4
							1602.71	0.20759	0.24174	3394.42244	-250089	3394.42244	-150510		3394.42244	0.49308	0.49248	0.49113	0.4906	0.48961	0.4893	0.48817	0.48791	0.48722	0.48732	0.48403	0.4832															1697.21122	1.16E-4	3.67E-4	3.8E-5	1626.81274	-3.35E-4	2.8582E-4
							1603.67	0.21169	0.2465	3393.45812	-253009	3393.45811	-134842		3393.45812	0.49364	0.49303	0.49168	0.49116	0.49016	0.48988	0.48872	0.48848	0.48775	0.48788	0.48462	0.48378															1696.2469	1.65E-4	4.56E-4	5.4E-5	1625.84842	-3.36E-4	2.30933E-4
							1604.64	0.21596	0.25146	3392.49379	-258321	3392.49379	-116709		3392.49379	0.49418	0.49356	0.49225	0.4917	0.4907	0.49042	0.48925	0.489	0.48826	0.48839	0.4852	0.48434															1695.28257	2.02E-4	5.22E-4	4E-5	1624.88411	-3.11E-4	1.74997E-4
							1605.6	0.22039	0.25662	3391.52947	-264572	3391.52947	-100308		3391.52947	0.49468	0.49406	0.49279	0.49221	0.49121	0.49095	0.48976	0.48952	0.48881	0.4889	0.48576	0.48487															1694.31825	2.43E-4	5.68E-4	1.3E-5	1623.91979	-2.89E-4	1.40352E-4
							1606.56	0.22501	0.26203	3390.56514	-265576	3390.56514	-89465		3390.56514	0.49517	0.49457	0.4933	0.49272	0.49173	0.49148	0.49029	0.49006	0.48934	0.4894	0.48632	0.4854															1693.35392	3.12E-4	6.11E-4	4E-6	1622.95547	-2.9E-4	1.44789E-4
							1607.53	0.22981	0.2677	3389.60082	-261430	3389.60082	-89209		3389.60082	0.49567	0.49508	0.49379	0.49321	0.49225	0.49197	0.49081	0.49058	0.48984	0.48989	0.48686	0.48592															1692.3896	4.02E-4	6.7E-4	1.2E-5	1621.99115	-3.13E-4	1.81606E-4
							1608.49	0.23479	0.27361	3388.63649	-257841	3388.63649	-93299		3388.63649	0.49617	0.49557	0.4943	0.49368	0.49275	0.49246	0.49132	0.49107	0.49034	0.49038	0.48736	0.48644															1691.42527	4.77E-4	7.47E-4	1.8E-5	1621.02683	-3.19E-4	2.14173E-4
							1609.46	0.23998	0.27982	3387.67217	-257894	3387.67217	-97195		3387.67217	0.49665	0.49605	0.4948	0.49416	0.49321	0.49297	0.49179	0.49156	0.49084	0.49088	0.48782	0.48694															1690.46095	5.21E-4	8.33E-4	9E-6	1620.06251	-2.96E-4	2.19661E-4
							1610.42	0.24538	0.2863	3386.70784	-258810	3386.70784	-109935		3386.70784	0.49712	0.49651	0.49525	0.49464	0.49367	0.49347	0.49225	0.49204	0.49131	0.49138	0.48829	0.48743															1689.49662	5.48E-4	9.02E-4	1E-6	1619.0982	-2.76E-4	1.96655E-4
							1611.39	0.25092	0.29297	3385.74352	-257424	3385.74352	-128358		3385.74352	0.49758	0.49695	0.49565	0.49511	0.49414	0.49393	0.49269	0.49247	0.49177	0.49185	0.48878	0.4879															1688.5323	5.77E-4	9.16E-4	6E-6	1618.13388	-2.63E-4	1.59281E-4
							1612.35	0.25661	0.29983	3384.77919	-254251	3384.77919	-131699		3384.77919	0.49802	0.49738	0.49605	0.49556	0.49461	0.49437	0.49313	0.49289	0.49221	0.49226	0.48925	0.48836															1687.56797	6.16E-4	8.87E-4	1.6E-5	1617.16956	-2.63E-4	1.43164E-4
							1613.31	0.26244	0.30687	3383.81487	-248706	3383.81487	-115978		3383.81487	0.49847	0.49782	0.4965	0.49598	0.49503	0.49479	0.49359	0.49334	0.49265	0.49268	0.48971	0.48881															1686.60365	6.57E-4	8.98E-4	1.7E-5	1616.20524	-2.72E-4	1.55307E-4
							1614.28	0.26839	0.31402	3382.85055	-240616	3382.85054	-97727		3382.85055	0.4989	0.49825	0.49694	0.4964	0.49542	0.4952	0.49404	0.49379	0.49308	0.49313	0.49017	0.48927															1685.63933	7.05E-4	9.91E-4	9E-6	1615.24092	-2.57E-4	1.61054E-4
							1615.24	0.27441	0.3212	3381.88622	-234442	3381.88622	-84034		3381.88622	0.49928	0.49867	0.49735	0.49678	0.49582	0.49561	0.49446	0.49422	0.49351	0.49357	0.4906	0.48973															1684.675	7.83E-4	0.00112	1.2E-5	1614.2766	-2.44E-4	1.41652E-4
							1616.21	0.2805	0.3284	3380.9219	-231611	3380.9219	-69233		3380.9219	0.49964	0.49907	0.49775	0.49714	0.49623	0.49602	0.49485	0.4946	0.49392	0.49396	0.49099	0.49015															1683.71068	8.71E-4	0.00127	2.2E-5	1613.31229	-2.93E-4	9.95505E-5
							1617.17	0.28659	0.33559	3379.95757	-228504	3379.95757	-56286		3379.95757	0.49998	0.49943	0.49815	0.4975	0.49662	0.49638	0.49524	0.49497	0.4943	0.4943	0.49136	0.49053															1682.74635	9.47E-4	0.00143	1.6E-5	1612.34797	-3.53E-4	5.45594E-5
							1618.14	0.29261	0.34271	3378.99325	-224862	3378.99325	-57979		3378.99325	0.50032	0.49976	0.49853	0.49787	0.49698	0.49672	0.49562	0.49533	0.49467	0.49464	0.49174	0.4909															1681.78203	0.00104	0.00156	-1E-6	1611.38365	-3.62E-4	3.56553E-5
							1619.1	0.29856	0.34976	3378.02892	-223171	3378.02892	-75314		3378.02892	0.50067	0.50008	0.49888	0.49824	0.49735	0.49707	0.49596	0.4957	0.49503	0.49499	0.49212	0.49126															1680.8177	0.00115	0.00166	-7E-6	1610.41933	-3.62E-4	4.387E-5
							1620.07	0.30443	0.35673	3377.0646	-223720	3377.0646	-93829		3377.0646	0.50102	0.50039	0.49922	0.4986	0.49772	0.49742	0.49631	0.49608	0.49538	0.49536	0.49249	0.49164															1679.85338	0.00124	0.00176	-2E-6	1609.45501	-3.84E-4	6.31087E-5
							1621.03	0.31018	0.36357	3376.10027	-224463	3376.10027	-103633		3376.10027	0.50135	0.50072	0.49956	0.49893	0.49806	0.49775	0.49668	0.49643	0.49572	0.49572	0.49286	0.49203															1678.88905	0.00131	0.00186	8E-6	1608.49069	-4.18E-4	8.63465E-5
							1621.99	0.31581	0.37023	3375.13595	-222094	3375.13595	-105039		3375.13595	0.50167	0.50105	0.49988	0.49923	0.49837	0.49808	0.49703	0.49672	0.49606	0.49607	0.49322	0.4924															1677.92473	0.00138	0.00193	1.7E-5	1607.52638	-4.36E-4	1.10974E-4
							1622.96	0.32131	0.37676	3374.17162	-215220	3374.17162	-96310		3374.17162	0.50198	0.50137	0.50019	0.49952	0.49868	0.49838	0.49733	0.49698	0.49637	0.49639	0.49356	0.49274															1676.9604	0.00147	0.002	2E-5	1606.56206	-3.98E-4	1.39335E-4
							1623.92	0.32665	0.38316	3373.2073	-206263	3373.2073	-78140		3373.2073	0.50231	0.50165	0.50046	0.49984	0.49899	0.49868	0.4976	0.49728	0.49666	0.49669	0.49389	0.49308															1675.99608	0.00156	0.00208	1.5E-5	1605.59774	-3.29E-4	1.88552E-4
							1624.89	0.33179	0.3894	3372.24298	-197728	3372.24297	-59347		3372.24298	0.50261	0.50194	0.50072	0.50017	0.49927	0.49898	0.49788	0.4976	0.49695	0.49697	0.49422	0.49341															1675.03176	0.00162	0.00219	1.6E-5	1604.63342	-2.83E-4	2.5553E-4
							1625.85	0.33677	0.39553	3371.27865	-190819	3371.27865	-42666		3371.27865	0.50287	0.50224	0.50099	0.50047	0.49954	0.49927	0.49818	0.4979	0.49726	0.49728	0.49453	0.49372															1674.06743	0.00166	0.00231	2.8E-5	1603.6691	-2.47E-4	3.117E-4
							1626.82	0.3416	0.40157	3370.31433	-186900	3370.31433	-26393		3370.31433	0.50311	0.50251	0.50124	0.50072	0.4998	0.49954	0.49849	0.49818	0.49758	0.49758	0.49479	0.49403															1673.10311	0.00171	0.00243	3.3E-5	1602.70479	-2.01E-4	3.6891E-4
							1627.78	0.34623	0.40748	3369.35	-186085	3369.35	-17166		3369.35	0.50336	0.50276	0.50152	0.50097	0.50007	0.49981	0.49878	0.49847	0.49788	0.49787	0.49507	0.49433															1672.13878	0.00179	0.00254	2.4E-5	1601.74047	-1.71E-4	4.51606E-4
							1628.74	0.3507	0.41322	3368.38568	-188623	3368.38568	-28199		3368.38568	0.50362	0.50301	0.50182	0.50124	0.50036	0.50011	0.49905	0.49876	0.49816	0.49815	0.49539	0.49463															1671.17446	0.00188	0.0026	7E-6	1600.77615	-1.64E-4	5.36383E-4
							1629.71	0.35503	0.41882	3367.42135	-197057	3367.42135	-64856		3367.42135	0.5039	0.50326	0.50209	0.50152	0.50063	0.5004	0.4993	0.49903	0.49841	0.49842	0.49571	0.49492															1670.21013	0.00192	0.0026	-1.5E-5	1599.81183	-1.53E-4	5.94251E-4
							1630.67	0.35919	0.42424	3366.45703	-208040	3366.45703	-110672		3366.45703	0.50417	0.5035	0.5023	0.50179	0.50088	0.50063	0.49956	0.49928	0.49866	0.49868	0.49597	0.49517															1669.24581	0.0019	0.00253	-1.6E-5	1598.84751	-1.39E-4	6.20879E-4
							1631.64	0.36315	0.42942	3365.4927	-212408	3365.4927	-147259		3365.4927	0.50441	0.50374	0.50252	0.50203	0.50113	0.50083	0.49981	0.49954	0.49892	0.49893	0.49622	0.49541															1668.28148	0.00178	0.00235	2.3E-5	1597.88319	-1.46E-4	6.09065E-4
							1632.6	0.36694	0.4344	3364.52838	-209824	3364.52838	-177867		3364.52838	0.50463	0.50397	0.50276	0.50225	0.50137	0.50102	0.50005	0.49977	0.49915	0.49917	0.49648	0.49566															1667.31716	0.00161	0.0021	6.3E-5	1596.91888	-1.68E-4	5.80518E-4
							1633.57	0.37053	0.43916	3363.56405	-207322	3363.56405	-208386		3363.56405	0.50482	0.50415	0.50299	0.50246	0.50159	0.50122	0.50027	0.49997	0.49936	0.49939	0.49672	0.4959															1666.35283	0.00147	0.00187	6.4E-5	1595.95456	-1.85E-4	5.86665E-4
							1634.53	0.37388	0.4436	3362.59973	-207234	3362.59973	-228244		3362.59973	0.50498	0.5043	0.5032	0.50264	0.50177	0.50141	0.50046	0.50015	0.49956	0.49959	0.49695	0.49613															1665.38851	0.00139	0.00168	4.4E-5	1594.99024	-1.88E-4	6.08547E-4
							1635.49	0.37698	0.44773	3361.6354	-207427	3361.6354	-222193		3361.6354	0.50514	0.50446	0.50338	0.5028	0.50194	0.50159	0.50066	0.50032	0.49977	0.49979	0.49719	0.49637															1664.42419	0.00134	0.00153	3.1E-5	1594.02592	-2.06E-4	5.97209E-4
							1636.46	0.37985	0.45155	3360.67108	-205032	3360.67108	-188639		3360.67108	0.50528	0.50462	0.50355	0.50292	0.50213	0.50176	0.50085	0.50049	0.49996	0.49998	0.4974	0.49658															1663.45986	0.00128	0.00141	2.1E-5	1593.0616	-2.55E-4	5.71244E-4
							1637.42	0.38241	0.455	3359.70676	-198177	3359.70676	-144217		3359.70676	0.50542	0.50479	0.50372	0.50305	0.50231	0.50193	0.501	0.50065	0.50013	0.50015	0.49757	0.49677															1662.49554	0.00126	0.00133	1.2E-5	1592.09728	-3E-4	5.54531E-4
							1638.39	0.38463	0.458	3358.74243	-186696	3358.74243	-107552		3358.74243	0.50559	0.50493	0.50387	0.50318	0.50247	0.50209	0.50113	0.50078	0.5003	0.50029	0.49773	0.49695															1661.53121	0.00125	0.00129	1.3E-5	1591.13297	-3.21E-4	5.31235E-4
							1639.35	0.38657	0.46061	3357.77811	-171042	3357.77811	-81209		3357.77811	0.50575	0.50503	0.50399	0.50331	0.50259	0.50224	0.50126	0.5009	0.50045	0.50037	0.49789	0.49711															1660.56689	0.00121	0.00119	2.6E-5	1590.16865	-3.46E-4	5.0073E-4
							1640.32	0.3882	0.4628	3356.81378	-152323	3356.81378	-63414		3356.81378	0.50585	0.50512	0.50409	0.5034	0.5027	0.50234	0.50137	0.50103	0.50058	0.50045	0.49804	0.49725															1659.60256	0.00113	0.00102	4.5E-5	1589.20433	-3.88E-4	4.83289E-4
							1641.28	0.38947	0.46454	3355.84946	-136631	3355.84946	-58351		3355.84946	0.50592	0.50519	0.50416	0.50347	0.50283	0.50243	0.50148	0.50115	0.5007	0.50056	0.49816	0.49738															1658.63824	0.00103	8.36E-4	3.2E-5	1588.24001	-4.39E-4	4.67193E-4
							1642.24	0.39039	0.46582	3354.88513	-131225	3354.88513	-61591		3354.88513	0.50601	0.50526	0.50421	0.50353	0.50294	0.50253	0.50158	0.50126	0.50081	0.50068	0.49826	0.4975															1657.67391	9.3E-4	6.64E-4	-1E-5	1587.27569	-4.82E-4	4.41997E-4
							1643.21	0.39096	0.46665	3353.92081	-133989	3353.92081	-62991		3353.92081	0.50608	0.50531	0.50429	0.50362	0.503	0.50259	0.50167	0.50133	0.50091	0.50077	0.49839	0.49761															1656.70959	8.62E-4	5.07E-4	-1.9E-5	1586.31137	-5.02E-4	4.37607E-4
							1644.17	0.39113	0.46696	3352.95648	-137983	3352.95648	-59380		3352.95648	0.50613	0.50536	0.50437	0.5037	0.50305	0.50262	0.50175	0.50138	0.50099	0.50084	0.49853	0.4977															1655.74526	8.34E-4	3.57E-4	1.4E-5	1585.34706	-5E-4	4.51254E-4
							1645.14	0.39087	0.46676	3351.99216	-137735	3351.99216	-54153		3351.99216	0.50616	0.50539	0.50444	0.50376	0.50309	0.50266	0.50181	0.50144	0.50103	0.50091	0.49864	0.49775															1654.78094	8.19E-4	2.53E-4	4.9E-5	1584.38274	-4.89E-4	4.45629E-4
							1646.1	0.39019	0.4661	3351.02783	-127283	3351.02783	-51583		3351.02783	0.5062	0.5054	0.50449	0.5038	0.50312	0.50271	0.50186	0.50148	0.50107	0.50097	0.49872	0.49782															1653.81662	8.13E-4	2.27E-4	6.9E-5	1583.41842	-4.99E-4	4.22208E-4
							1647.07	0.38907	0.46496	3350.06351	-110645	3350.06351	-52275		3350.06351	0.50625	0.50542	0.50452	0.50382	0.50314	0.50276	0.5019	0.5015	0.50112	0.501	0.4988	0.49792															1652.85229	8.04E-4	1.86E-4	5.7E-5	1582.4541	-5.46E-4	4.11484E-4
							1648.03	0.38754	0.46333	3349.09919	-101883	3349.09919	-58341		3349.09919	0.5063	0.50542	0.50451	0.50382	0.50316	0.50278	0.50194	0.50151	0.50119	0.50101	0.49889	0.49802															1651.88797	7.47E-4	9.6E-5	2E-5	1581.48978	-5.79E-4	4.22708E-4
							1648.99	0.38564	0.46132	3348.13486	-105215	3348.13486	-72410		3348.13486	0.50631	0.50539	0.50451	0.50379	0.50319	0.50278	0.50196	0.50153	0.50124	0.501	0.49897	0.49809															1650.92364	6.71E-4	3.4E-5	8E-6	1580.52546	-5.63E-4	4.30522E-4
							1649.96	0.38335	0.45893	3347.17054	-113353	3347.17054	-87184		3347.17054	0.50629	0.50535	0.50453	0.50376	0.5032	0.50276	0.50197	0.50153	0.50127	0.50098	0.49903	0.49812															1649.95932	6.34E-4	-9E-6	2.5E-5	1579.56115	-5.41E-4	4.04926E-4
							1650.92	0.38067	0.45604	3346.20621	-119001	3346.20621	-93511		3346.20621	0.50627	0.50531	0.50454	0.50373	0.50317	0.50273	0.50196	0.50153	0.50126	0.50095	0.49907	0.49812															1648.99499	6.26E-4	-1.15E-4	3.3E-5	1578.59683	-5.43E-4	3.4889E-4
							1651.89	0.37763	0.45266	3345.24189	-119332	3345.24189	-96653		3345.24189	0.50623	0.50528	0.50451	0.50371	0.50314	0.50269	0.50195	0.50152	0.50123	0.50093	0.49912	0.49811															1648.03067	5.76E-4	-2.9E-4	2.8E-5	1577.63251	-5.5E-4	2.94301E-4
							1652.85	0.37431	0.44883	3344.27756	-113774	3344.27756	-103208		3344.27756	0.50619	0.50526	0.50447	0.50368	0.50311	0.50265	0.50192	0.5015	0.50119	0.50092	0.49914	0.49812															1647.06634	4.24E-4	-5E-4	2.8E-5	1576.66819	-5.7E-4	2.70878E-4
							1653.82	0.37064	0.44453	3343.31324	-99639	3343.31324	-102102		3343.31324	0.50615	0.5052	0.50441	0.50361	0.50309	0.50262	0.5019	0.50145	0.50115	0.5009	0.49916	0.49814															1646.10202	2.34E-4	-7.54E-4	4.1E-5	1575.70387	-6.12E-4	2.75783E-4
							1654.78	0.36664	0.43975	3342.34891	-81310	3342.34891	-84509		3342.34891	0.5061	0.5051	0.50433	0.5035	0.50305	0.50257	0.50187	0.50136	0.50111	0.50086	0.49917	0.49816															1645.13769	1.02E-4	-0.00103	5.7E-5	1574.73956	-6.23E-4	2.64786E-4
							1655.75	0.3624	0.43459	3341.38459	-72677	3341.38459	-60627		3341.38459	0.50604	0.50498	0.50426	0.50341	0.50299	0.50249	0.50183	0.50126	0.50108	0.50082	0.49918	0.49815															1644.17337	2.4E-5	-0.00128	5.3E-5	1573.77524	-5.75E-4	2.21282E-4
							1656.71	0.35796	0.42908	3340.42026	-80351	3340.42026	-44002		3340.42026	0.50593	0.50487	0.50419	0.50336	0.50291	0.50242	0.50175	0.50116	0.50105	0.50076	0.49918	0.49812															1643.20905	-4.3E-5	-0.00151	2.5E-5	1572.81092	-5.24E-4	1.91781E-4
							1657.67	0.3533	0.4232	3339.45594	-93202	3339.45594	-35672		3339.45594	0.50582	0.50478	0.50411	0.50331	0.50282	0.50235	0.50165	0.50109	0.50099	0.5007	0.49916	0.49811															1642.24472	-1.13E-4	-0.0017	-1.1E-5	1571.8466	-5.02E-4	1.98685E-4
							1658.64	0.34849	0.41704	3338.49162	-93864	3338.49162	-28382		3338.49162	0.50572	0.50469	0.50402	0.50324	0.50272	0.50226	0.50155	0.50104	0.50091	0.50063	0.49913	0.49808															1641.2804	-1.86E-4	-0.00179	-2.7E-5	1570.88228	-5.05E-4	2.0987E-4
							1659.6	0.34356	0.4107	3337.52729	-79981	3337.52729	-18541		3337.52729	0.50564	0.50459	0.50392	0.50314	0.50263	0.50218	0.50147	0.501	0.50081	0.50055	0.4991	0.49804															1640.31607	-2.45E-4	-0.00176	1.1E-5	1569.91796	-5.44E-4	2.23751E-4
							1660.57	0.3385	0.40414	3336.56297	-61994	3336.56297	-8012		3336.56297	0.50555	0.50448	0.50381	0.50301	0.50254	0.50208	0.50141	0.50092	0.5007	0.50046	0.49905	0.49799															1639.35175	-2.81E-4	-0.0017	5.5E-5	1568.95365	-6.01E-4	2.71181E-4
							1661.53	0.33334	0.39743	3335.59864	-46645	3335.59864	382		3335.59864	0.50544	0.50436	0.5037	0.50287	0.50244	0.50197	0.50134	0.50083	0.50061	0.50037	0.49898	0.49795															1638.38742	-2.92E-4	-0.00179	2E-5	1567.98933	-6.35E-4	3.25106E-4
							1662.5	0.32814	0.39068	3334.63432	-37965	3334.63432	7067		3334.63432	0.5053	0.50423	0.50358	0.50275	0.50235	0.50188	0.50126	0.50074	0.50052	0.5003	0.49891	0.49791															1637.4231	-3.37E-4	-0.002	-4.1E-5	1567.02501	-6.19E-4	3.38044E-4
							1663.46	0.32286	0.38386	3333.66999	-37143	3333.66999	14680		3333.66999	0.50518	0.50412	0.50347	0.50265	0.50225	0.5018	0.50116	0.50066	0.50045	0.50024	0.49887	0.49786															1636.45877	-4.83E-4	-0.00215	-5.1E-5	1566.06069	-5.49E-4	3.29171E-4
							1664.42	0.31751	0.37694	3332.70567	-38558	3332.70567	24182		3332.70567	0.50507	0.50402	0.50337	0.50257	0.50215	0.50171	0.50106	0.50057	0.5004	0.50018	0.49886	0.49783															1635.49445	-6.47E-4	-0.00222	-6.2E-5	1565.09637	-4.77E-4	3.2049E-4
							1665.39	0.31214	0.36997	3331.74134	-35615	3331.74134	37559		3331.74134	0.50495	0.50395	0.50325	0.50249	0.50207	0.5016	0.50099	0.5005	0.50035	0.5001	0.49883	0.49781															1634.53012	-7.12E-4	-0.00228	-9E-5	1564.13205	-4.43E-4	2.98328E-4
							1666.35	0.30672	0.36296	3330.77702	-26858	3330.77702	55507		3330.77702	0.50481	0.50387	0.50314	0.5024	0.502	0.50148	0.50092	0.50043	0.50027	0.50001	0.49881	0.49778															1633.5658	-7.09E-4	-0.00236	-6.7E-5	1563.16774	-4.29E-4	2.70518E-4
							1667.32	0.30121	0.35587	3329.81269	-17797	3329.81269	73775		3329.81269	0.50472	0.50379	0.50304	0.50231	0.50193	0.50137	0.50085	0.50034	0.50019	0.49992	0.49878	0.49772															1632.60147	-7.08E-4	-0.00244	2E-6	1562.20342	-4.38E-4	2.5387E-4
							1668.28	0.29565	0.34872	3328.84837	-12421	3328.84837	85915		3328.84837	0.50467	0.5037	0.50297	0.50221	0.50184	0.50129	0.50077	0.50026	0.50013	0.49984	0.49875	0.49766															1631.63715	-7.37E-4	-0.00242	3.3E-5	1561.2391	-4.83E-4	2.37964E-4
							1669.25	0.29003	0.34153	3327.88405	-7504	3327.88404	88933		3327.88405	0.5046	0.50359	0.50291	0.50212	0.50175	0.50123	0.50071	0.5002	0.50007	0.49978	0.49872	0.49762															1630.67283	-7.93E-4	-0.00236	1.5E-5	1560.27478	-5.15E-4	2.28236E-4
							1670.21	0.28433	0.33425	3326.91972	-4826	3326.91972	88568		3326.91972	0.50451	0.50348	0.50286	0.50204	0.50167	0.50119	0.50065	0.50016	0.50002	0.49975	0.4987	0.49761															1629.7085	-8.37E-4	-0.00238	-9E-6	1559.31046	-4.94E-4	2.51558E-4
							1671.17	0.27855	0.32689	3325.9554	-7190	3325.9554	93992		3325.9554	0.50443	0.50342	0.50279	0.502	0.5016	0.50117	0.50061	0.50012	0.49998	0.4997	0.49869	0.49763															1628.74418	-8.55E-4	-0.00248	-1E-5	1558.34614	-4.67E-4	2.93506E-4
							1672.14	0.27276	0.31952	3324.99107	-7025	3324.99107	102048		3324.99107	0.50437	0.50336	0.50272	0.50195	0.50156	0.50115	0.50057	0.50008	0.49995	0.49964	0.4987	0.49763															1627.77985	-8.65E-4	-0.00249	-5E-6	1557.38183	-4.61E-4	3.22676E-4
							1673.1	0.26695	0.31213	3324.02675	438	3324.02675	102428		3324.02675	0.50433	0.50329	0.50263	0.50187	0.50152	0.50109	0.50052	0.50003	0.49993	0.4996	0.49871	0.49762															1626.81553	-8.74E-4	-0.00242	-2.8E-5	1556.41751	-4.5E-4	3.60611E-4
							1674.07	0.2611	0.30469	3323.06242	8990	3323.06242	100747		3323.06242	0.5043	0.50322	0.50258	0.50181	0.50149	0.50104	0.50047	0.5	0.49993	0.49959	0.49871	0.49763															1625.8512	-8.96E-4	-0.00241	-6.2E-5	1555.45319	-4.26E-4	4.47923E-4
							1675.03	0.25525	0.29725	3322.0981	12496	3322.0981	109435		3322.0981	0.50426	0.50317	0.50257	0.5018	0.50148	0.50101	0.50044	0.49998	0.49992	0.4996	0.49873	0.49766															1624.88688	-9.3E-4	-0.00246	-6.9E-5	1554.48887	-3.84E-4	5.6301E-4
							1676	0.24941	0.28985	3321.13377	12541	3321.13377	124549		3321.13377	0.50421	0.50313	0.50256	0.5018	0.50149	0.50099	0.50041	0.49998	0.4999	0.49959	0.49875	0.49773															1623.92255	-9.48E-4	-0.00251	-6.3E-5	1553.52455	-3.24E-4	6.41358E-4
							1676.96	0.24354	0.28247	3320.16945	14658	3320.16945	134563		3320.16945	0.50415	0.50312	0.50256	0.50179	0.50149	0.50096	0.50041	0.49998	0.49987	0.4996	0.49878	0.49779															1622.95823	-9.28E-4	-0.00248	-6.3E-5	1552.56024	-2.67E-4	6.71837E-4
							1677.92	0.23768	0.27513	3319.20512	18722	3319.20512	133283		3319.20512	0.50413	0.50315	0.50259	0.50178	0.50148	0.50096	0.50043	0.49997	0.49987	0.49964	0.49882	0.49784															1621.9939	-8.75E-4	-0.00236	-7.3E-5	1551.59592	-1.97E-4	6.9342E-4
							1678.89	0.23185	0.26782	3318.2408	19820	3318.2408	117958		3318.2408	0.50415	0.50316	0.5026	0.50179	0.5015	0.50097	0.50046	0.49997	0.49991	0.49969	0.49885	0.49789															1621.02958	-8.24E-4	-0.00225	-7.5E-5	1550.6316	-1.31E-4	7.08913E-4
							1679.85	0.226	0.26052	3317.27648	16893	3317.27647	89041		3317.27648	0.50418	0.50313	0.5026	0.5018	0.50153	0.501	0.5005	0.50001	0.49996	0.49973	0.49889	0.49796															1620.06526	-7.98E-4	-0.00215	-6.3E-5	1549.66728	-1.5E-4	6.88994E-4
							1680.82	0.2201	0.25319	3316.31215	13116	3316.31215	54591		3316.31215	0.50421	0.50312	0.50258	0.50181	0.50154	0.50102	0.50053	0.50006	0.5	0.49976	0.49894	0.49804															1619.10093	-7.93E-4	-0.00206	-5.7E-5	1548.70296	-2.63E-4	6.45801E-4
							1681.78	0.21418	0.24587	3315.34783	9217	3315.34783	26013		3315.34783	0.50424	0.50315	0.50259	0.50183	0.50155	0.50105	0.50057	0.50011	0.50006	0.49978	0.49902	0.49812															1618.13661	-7.84E-4	-0.00199	-6.9E-5	1547.73864	-3.92E-4	6.25227E-4
							1682.75	0.2082	0.23854	3314.3835	3979	3314.3835	6415		3314.3835	0.50427	0.50319	0.50262	0.50186	0.50156	0.50111	0.5006	0.50014	0.50012	0.49982	0.4991	0.49819															1617.17228	-7.38E-4	-0.00191	-9E-5	1546.77433	-4.69E-4	6.28998E-4
							1683.71	0.20217	0.23113	3313.41918	17	3313.41918	-10476		3313.41918	0.50429	0.50321	0.50266	0.5019	0.50161	0.50119	0.50064	0.50016	0.50018	0.49987	0.49918	0.49827															1616.20796	-6.77E-4	-0.00182	-8.3E-5	1545.81001	-4.65E-4	6.3088E-4
							1684.68	0.1961	0.22364	3312.45485	112	3312.45485	-28865		3312.45485	0.50431	0.50322	0.50269	0.50196	0.5017	0.50125	0.50071	0.50022	0.50024	0.49995	0.49925	0.49838															1615.24363	-6.22E-4	-0.00174	-4.7E-5	1544.84569	-4.11E-4	6.36679E-4
							1685.64	0.19003	0.21611	3311.49053	2221	3311.49053	-45418		3311.49053	0.50433	0.50325	0.50274	0.50203	0.50178	0.5013	0.5008	0.5003	0.50032	0.50004	0.49933	0.49849															1614.27931	-5.49E-4	-0.00165	-3E-5	1543.88137	-3.86E-4	6.56082E-4
							1686.6	0.18396	0.2085	3310.5262	4652	3310.5262	-57378		3310.5262	0.50433	0.5033	0.5028	0.5021	0.50182	0.50136	0.5009	0.50038	0.5004	0.50013	0.49942	0.49859															1613.31498	-4.82E-4	-0.00159	-3.1E-5	1542.91705	-4.4E-4	6.8377E-4
							1687.57	0.17793	0.20081	3309.56188	6910	3309.56188	-67638		3309.56188	0.50436	0.50336	0.50288	0.50217	0.50186	0.50144	0.50097	0.50045	0.50045	0.50021	0.49951	0.49867															1612.35066	-4.61E-4	-0.00155	-2.5E-5	1541.95273	-4.94E-4	7.02794E-4
							1688.53	0.17195	0.19312	3308.59755	7338	3308.59755	-77037		3308.59755	0.50441	0.50344	0.50294	0.50222	0.50194	0.50152	0.50103	0.50052	0.50052	0.50026	0.49959	0.49875															1611.38633	-4.52E-4	-0.00148	-3.2E-5	1540.98842	-4.73E-4	6.90514E-4
							1689.5	0.166	0.18544	3307.63323	6444	3307.63323	-83179		3307.63323	0.50447	0.50352	0.50298	0.50229	0.50202	0.50159	0.5011	0.50061	0.50061	0.50033	0.49968	0.49888															1610.42201	-4.19E-4	-0.00139	-3.9E-5	1540.0241	-4.56E-4	6.5801E-4
							1690.46	0.16008	0.17781	3306.66891	5278	3306.6689	-91047		3306.66891	0.50452	0.50357	0.50302	0.50234	0.50207	0.50166	0.50118	0.50071	0.5007	0.50043	0.49977	0.49901															1609.45769	-3.94E-4	-0.00132	-1.5E-5	1539.05978	-5.31E-4	6.26754E-4
							1691.43	0.15422	0.17033	3305.70458	4102	3305.70458	-108171		3305.70458	0.50456	0.50361	0.50306	0.50239	0.50212	0.50173	0.50124	0.50079	0.50076	0.50053	0.49985	0.49911															1608.49336	-3.99E-4	-0.00129	6E-6	1538.09546	-6.34E-4	5.85844E-4
							1692.39	0.14844	0.16302	3304.74026	4965	3304.74026	-128683		3304.74026	0.50456	0.50365	0.50312	0.50243	0.50217	0.50178	0.50128	0.50084	0.50081	0.50062	0.49991	0.49918															1607.52904	-3.97E-4	-0.00128	-1E-6	1537.13114	-6.64E-4	5.29601E-4
							1693.35	0.14277	0.15593	3303.77593	6828	3303.77593	-141965		3303.77593	0.50456	0.50368	0.50317	0.50247	0.5022	0.50182	0.5013	0.50087	0.50085	0.50069	0.49996	0.49925															1606.56471	-3.86E-4	-0.00125	-2E-6	1536.16682	-6.64E-4	4.74823E-4
							1694.32	0.13724	0.14908	3302.81161	5268	3302.81161	-147133		3302.81161	0.50455	0.50372	0.50317	0.5025	0.50222	0.50185	0.50133	0.50092	0.50089	0.50077	0.50001	0.49932															1605.60039	-3.91E-4	-0.00119	4E-6	1535.20251	-7.12E-4	4.24113E-4
							1695.28	0.13191	0.14252	3301.84728	-665	3301.84728	-150288		3301.84728	0.50454	0.50374	0.50317	0.50253	0.50225	0.50188	0.50136	0.50098	0.50089	0.50083	0.50004	0.4994															1604.63606	-4.02E-4	-0.00113	-3E-6	1534.23819	-7.74E-4	3.80761E-4
							1696.25	0.12677	0.13624	3300.88296	-9038	3300.88296	-157364		3300.88296	0.50451	0.50375	0.50319	0.50255	0.50228	0.50192	0.50137	0.50106	0.50091	0.50085	0.50006	0.49946															1603.67174	-3.92E-4	-0.00111	-2.8E-5	1533.27387	-7.9E-4	3.63755E-4
							1697.21	0.12185	0.13028	3299.91863	-19445	3299.91863	-167349		3299.91863	0.50449	0.50375	0.5032	0.50259	0.50229	0.50195	0.50139	0.50111	0.50095	0.50086	0.50008	0.49951															1602.70741	-3.69E-4	-0.0011	-4.7E-5	1532.30955	-7.72E-4	3.566E-4
							1698.18	0.11717	0.12465	3298.95431	-30274	3298.95431	-172931		3298.95431	0.50446	0.50375	0.50319	0.50263	0.50227	0.50198	0.50139	0.50113	0.50099	0.50089	0.50009	0.49954															1601.74309	-3.71E-4	-0.00111	-2.3E-5	1531.34523	-7.6E-4	3.34567E-4
							1699.14	0.11273	0.11932	3297.98998	-38938	3297.98998	-169365		3297.98998	0.50441	0.50373	0.50316	0.50263	0.50223	0.502	0.50138	0.50112	0.50099	0.50091	0.50007	0.49957															1600.77876	-3.9E-4	-0.0011	2.5E-5	1530.38092	-7.65E-4	3.13815E-4
							1700.1	0.10848	0.11425	3297.02566	-45950	3297.02566	-158010		3297.02566	0.50433	0.50371	0.50311	0.50259	0.50217	0.50197	0.50135	0.50111	0.50094	0.5009	0.50004	0.49959															1599.81444	-3.89E-4	-0.00106	4.1E-5	1529.4166	-7.45E-4	3.08854E-4
							1701.07	0.10444	0.10943	3296.06134	-50479	3296.06133	-148598		3296.06134	0.50426	0.50368	0.50304	0.50254	0.50213	0.50194	0.50133	0.50111	0.50087	0.50087	0.50003	0.49961															1598.85012	-3.65E-4	-0.00103	3.5E-5	1528.45228	-6.81E-4	3.22729E-4
							1702.03	0.10059	0.10486	3295.09701	-51167	3295.09701	-152166		3295.09701	0.50419	0.50363	0.50296	0.50249	0.50206	0.50192	0.5013	0.50109	0.50081	0.50084	0.50001	0.49959															1597.88579	-3.35E-4	-9.99E-4	3.7E-5	1527.48796	-6.39E-4	3.57899E-4
							1703	0.09692	0.10051	3294.13269	-51727	3294.13269	-168019		3294.13269	0.5041	0.50356	0.50286	0.50242	0.50197	0.50188	0.50124	0.50105	0.50075	0.50081	0.49994	0.49955															1596.92147	-2.96E-4	-9.48E-4	3.9E-5	1526.52364	-6.45E-4	4.12295E-4
							1703.96	0.09342	0.0964	3293.16836	-54675	3293.16836	-187658		3293.16836	0.50398	0.50347	0.50276	0.50237	0.5019	0.50181	0.50116	0.50098	0.50066	0.50078	0.49983	0.49949															1595.95714	-2.44E-4	-8.88E-4	4.2E-5	1525.55932	-6.45E-4	4.77345E-4
							1704.93	0.09011	0.09253	3292.20404	-59178	3292.20404	-204373		3292.20404	0.50385	0.50337	0.50266	0.50231	0.50181	0.50171	0.50107	0.5009	0.50057	0.50073	0.49974	0.49943															1594.99282	-1.84E-4	-8.37E-4	4.8E-5	1524.59501	-6.32E-4	5.32848E-4
							1705.89	0.08695	0.08887	3291.23971	-64008	3291.23971	-214156		3291.23971	0.5037	0.50325	0.50253	0.50222	0.50171	0.5016	0.50095	0.5008	0.50048	0.50065	0.49964	0.49937															1594.02849	-1.51E-4	-7.93E-4	4.2E-5	1523.63069	-6.3E-4	5.64884E-4
							1706.85	0.08393	0.0854	3290.27539	-66068	3290.27539	-218374		3290.27539	0.50354	0.50311	0.50238	0.50211	0.50159	0.50151	0.50079	0.50071	0.50039	0.50055	0.49952	0.4993															1593.06417	-1.61E-4	-7.65E-4	3.1E-5	1522.66637	-6.32E-4	5.75309E-4
							1707.82	0.08107	0.08214	3289.31106	-65397	3289.31106	-224762		3289.31106	0.50336	0.50295	0.5022	0.50199	0.50143	0.5014	0.50064	0.50058	0.50028	0.50043	0.49938	0.4992															1592.09984	-1.65E-4	-7.35E-4	3.2E-5	1521.70205	-6.37E-4	5.67766E-4
							1708.78	0.07836	0.07908	3288.34674	-67287	3288.34674	-238285		3288.34674	0.50314	0.50278	0.50203	0.50182	0.50124	0.50124	0.50049	0.50043	0.50016	0.50029	0.49921	0.49906															1591.13552	-1.35E-4	-6.74E-4	4.6E-5	1520.73773	-6.59E-4	5.57284E-4
							1709.75	0.07578	0.07622	3287.38241	-72170	3287.38241	-251623		3287.38241	0.50293	0.50262	0.50185	0.50161	0.50104	0.50106	0.50033	0.50027	0.5	0.50013	0.49903	0.49892															1590.17119	-1.29E-4	-6.06E-4	5.8E-5	1519.77341	-6.95E-4	5.62495E-4
							1710.71	0.0733	0.07353	3286.41809	-75010	3286.41809	-255320		3286.41809	0.50273	0.50243	0.50165	0.5014	0.50085	0.50088	0.50013	0.50011	0.49981	0.49995	0.49884	0.49877															1589.20687	-1.49E-4	-5.77E-4	5.1E-5	1518.8091	-7.21E-4	5.57917E-4
							1711.68	0.07095	0.07099	3285.45376	-77096	3285.45376	-252387		3285.45376	0.50252	0.50221	0.50143	0.5012	0.50064	0.5007	0.4999	0.49995	0.49957	0.49975	0.49863	0.4986															1588.24255	-1.26E-4	-5.88E-4	3.2E-5	1517.84478	-7.31E-4	5.22013E-4
							1712.64	0.06872	0.06859	3284.48944	-83181	3284.48944	-250958		3284.48944	0.50229	0.50196	0.50118	0.501	0.50041	0.5005	0.49968	0.49975	0.49931	0.49955	0.4984	0.49841															1587.27822	-6.6E-5	-5.96E-4	2.1E-5	1516.88046	-7.42E-4	4.91427E-4
							1713.6	0.06659	0.06632	3283.52512	-88762	3283.52512	-252288		3283.52512	0.502	0.5017	0.50091	0.50079	0.50016	0.50025	0.49944	0.49951	0.49906	0.49935	0.49816	0.49819															1586.3139	-1.9E-5	-5.71E-4	2.8E-5	1515.91614	-7.57E-4	4.93478E-4
							1714.57	0.06454	0.06417	3282.56079	-86594	3282.56079	-254300		3282.56079	0.50168	0.50141	0.50063	0.50054	0.49988	0.49999	0.49917	0.49924	0.49881	0.49912	0.49791	0.49794															1585.34957	1.9E-5	-5.36E-4	4.4E-5	1514.95182	-7.7E-4	5.06422E-4
							1715.53	0.06258	0.06213	3281.59647	-79586	3281.59647	-256865		3281.59647	0.50133	0.50113	0.50034	0.50024	0.49957	0.49972	0.49889	0.49896	0.49854	0.49888	0.49762	0.49767															1584.38525	5.3E-5	-5.15E-4	5.2E-5	1513.9875	-7.8E-4	4.85441E-4
							1716.5	0.0607	0.06018	3280.63214	-76195	3280.63214	-258995		3280.63214	0.50098	0.50083	0.50004	0.49994	0.49923	0.49943	0.4986	0.49867	0.49823	0.49862	0.49731	0.49738															1583.42092	6.8E-5	-4.93E-4	4.6E-5	1513.02319	-7.7E-4	4.21464E-4
							1717.46	0.05888	0.05831	3279.66782	-81550	3279.66782	-258859		3279.66782	0.50062	0.50048	0.4997	0.49962	0.49889	0.49912	0.49827	0.49837	0.4979	0.49832	0.49697	0.49707															1582.4566	6.9E-5	-4.48E-4	3.4E-5	1512.05887	-7.38E-4	3.61815E-4
							1718.43	0.05713	0.05653	3278.70349	-93990	3278.70349	-258380		3278.70349	0.50024	0.50011	0.49932	0.49926	0.49853	0.49878	0.49789	0.49809	0.49755	0.49797	0.49661	0.49676															1581.49227	6.2E-5	-4.03E-4	4.8E-5	1511.09455	-7.1E-4	3.29839E-4
							1719.39	0.05544	0.05484	3277.73917	-106600	3277.73917	-260722		3277.73917	0.49982	0.49974	0.49892	0.49887	0.49817	0.49842	0.4975	0.49778	0.49717	0.4976	0.49626	0.49645															1580.52795	5.1E-5	-3.88E-4	8E-5	1510.13023	-7.08E-4	3.02853E-4
							1720.36	0.05382	0.05321	3276.77484	-118526	3276.77484	-259953		3276.77484	0.49939	0.49935	0.49849	0.49847	0.4978	0.49806	0.49711	0.49741	0.49677	0.49722	0.49591	0.49611															1579.56362	6.5E-5	-3.94E-4	1.02E-4	1509.16591	-7.35E-4	2.72197E-4
							1721.32	0.05226	0.05164	3275.81052	-133550	3275.81052	-245737		3275.81052	0.49898	0.49894	0.49806	0.49807	0.49739	0.49768	0.49672	0.49698	0.49639	0.49683	0.49554	0.49573															1578.5993	1.22E-4	-3.87E-4	1.19E-4	1508.20159	-7.72E-4	2.43797E-4
							1722.28	0.05075	0.05012	3274.84619	-148450	3274.84619	-225796		3274.84619	0.49854	0.49851	0.49763	0.49767	0.49695	0.49727	0.49631	0.49653	0.496	0.49645	0.49513	0.49532															1577.63498	1.73E-4	-3.71E-4	1.17E-4	1507.23728	-8.03E-4	2.16391E-4
							1723.25	0.04929	0.04866	3273.88187	-157484	3273.88187	-216105		3273.88187	0.49807	0.49805	0.49719	0.49725	0.49649	0.49683	0.49587	0.4961	0.49556	0.49604	0.49466	0.49489															1576.67065	1.69E-4	-3.87E-4	8.9E-5	1506.27296	-8.28E-4	1.9555E-4
							1724.21	0.04787	0.04725	3272.91755	-159611	3272.91755	-215472		3272.91755	0.49757	0.49757	0.49673	0.49678	0.49602	0.49636	0.49541	0.49567	0.49508	0.49559	0.49418	0.49443															1575.70633	1.49E-4	-4.08E-4	6.9E-5	1505.30864	-8.28E-4	1.78497E-4
							1725.18	0.0465	0.0459	3271.95322	-156114	3271.95322	-215417		3271.95322	0.49703	0.49708	0.49622	0.49626	0.49553	0.49588	0.49489	0.49521	0.49459	0.49511	0.4937	0.49397															1574.742	1.62E-4	-3.85E-4	6.8E-5	1504.34432	-7.93E-4	1.37388E-4
							1726.14	0.04518	0.04461	3270.9889	-150179	3270.9889	-216281		3270.9889	0.49646	0.49655	0.49566	0.49574	0.49502	0.49539	0.49436	0.49472	0.49408	0.49462	0.4932	0.4935															1573.77768	1.94E-4	-3.59E-4	6.7E-5	1503.38	-7.6E-4	7.13632E-5
							1727.11	0.04391	0.04335	3270.02457	-146834	3270.02457	-223750		3270.02457	0.4959	0.49601	0.4951	0.49523	0.49449	0.49486	0.49383	0.49421	0.49357	0.49414	0.49268	0.49301															1572.81335	2.02E-4	-3.62E-4	5.1E-5	1502.41569	-7.65E-4	2.98638E-5
							1728.07	0.04268	0.04214	3269.06025	-146693	3269.06025	-235069		3269.06025	0.49534	0.49548	0.49455	0.4947	0.49393	0.4943	0.4933	0.49367	0.49303	0.49362	0.49215	0.49251															1571.84903	1.81E-4	-3.7E-4	4.2E-5	1501.45137	-7.79E-4	5.16599E-5
							1729.03	0.04149	0.04097	3268.09592	-144844	3268.09592	-238315		3268.09592	0.49478	0.49492	0.49399	0.49417	0.49337	0.49375	0.49278	0.49311	0.49247	0.49308	0.49161	0.49199															1570.8847	1.62E-4	-3.82E-4	6.9E-5	1500.48705	-7.48E-4	1.22292E-4
							1730	0.04034	0.03983	3267.1316	-139622	3267.1316	-228642		3267.1316	0.49418	0.49432	0.49341	0.49362	0.4928	0.49319	0.49222	0.49255	0.4919	0.49252	0.49106	0.49147															1569.92038	1.62E-4	-4.12E-4	1.14E-4	1499.52273	-6.58E-4	2.21873E-4
							1730.96	0.03921	0.03872	3266.16727	-134404	3266.16727	-210762		3266.16727	0.49356	0.49369	0.4928	0.49305	0.49222	0.4926	0.49161	0.492	0.49133	0.49193	0.49051	0.49091															1568.95605	1.68E-4	-4.46E-4	1.44E-4	1498.55841	-5.59E-4	3.48796E-4
							1731.93	0.03813	0.03766	3265.20295	-131010	3265.20295	-191696		3265.20295	0.49291	0.49305	0.49217	0.49245	0.49161	0.492	0.49097	0.49143	0.49076	0.49133	0.48993	0.4903															1567.99173	1.59E-4	-4.67E-4	1.45E-4	1497.59409	-4.81E-4	4.79876E-4
							1732.89	0.03708	0.03664	3264.23862	-128855	3264.23862	-176632		3264.23862	0.49227	0.49241	0.49154	0.4918	0.49097	0.49137	0.49033	0.49083	0.49017	0.49072	0.48933	0.48969															1567.02741	1.43E-4	-4.84E-4	1.22E-4	1496.62978	-3.91E-4	5.93232E-4
							1733.86	0.03607	0.03566	3263.2743	-127345	3263.2743	-162631		3263.2743	0.49161	0.49176	0.49089	0.49112	0.49029	0.49072	0.4897	0.49018	0.48955	0.4901	0.48872	0.48909															1566.06308	1.23E-4	-5.4E-4	1.11E-4	1495.66546	-2.74E-4	7.17648E-4
							1734.82	0.03509	0.03471	3262.30998	-125156	3262.30998	-140880		3262.30998	0.49093	0.4911	0.49023	0.49044	0.48962	0.49006	0.48908	0.48951	0.48891	0.48946	0.4881	0.48848															1565.09876	8.8E-5	-6.44E-4	1.27E-4	1494.70114	-1.56E-4	8.76119E-4
							1735.78	0.03413	0.03379	3261.34565	-123805	3261.34565	-111824		3261.34565	0.49022	0.49044	0.48956	0.48977	0.48895	0.48942	0.48846	0.48883	0.48827	0.48881	0.48746	0.48785															1564.13443	4.8E-5	-7.34E-4	1.36E-4	1493.73682	-5.4E-5	0.00104
							1736.75	0.03321	0.03288	3260.38133	-126936	3260.38133	-86750		3260.38133	0.48954	0.48976	0.48888	0.48909	0.4883	0.48878	0.48781	0.48818	0.48761	0.48815	0.48678	0.4872															1563.17011	1.7E-5	-7.85E-4	1.29E-4	1492.7725	2.6E-5	0.00117
							1737.71	0.03233	0.03201	3259.417	-133502	3259.417	-73297		3259.417	0.48885	0.48906	0.48818	0.48842	0.48761	0.4881	0.48711	0.48754	0.48693	0.4875	0.48609	0.48655															1562.20578	6E-6	-8.4E-4	1.08E-4	1491.80818	7.4E-5	0.00128
							1738.68	0.03147	0.03116	3258.45268	-140202	3258.45268	-66588		3258.45268	0.48813	0.48837	0.48745	0.48773	0.4869	0.48739	0.4864	0.48686	0.48621	0.48686	0.48541	0.48591															1561.24146	6E-6	-9.07E-4	9.9E-5	1490.84387	9.7E-5	0.00138
							1739.64	0.03063	0.03033	3257.48835	-143895	3257.48835	-56543		3257.48835	0.48739	0.48766	0.48673	0.48703	0.48621	0.48669	0.4857	0.48616	0.48549	0.4862	0.48475	0.48527															1560.27713	0	-9.7E-4	1.42E-4	1489.87955	1.17E-4	0.00146
							1740.61	0.02981	0.02953	3256.52403	-142627	3256.52403	-43759		3256.52403	0.48666	0.48694	0.48604	0.48632	0.48554	0.486	0.48501	0.48545	0.48479	0.48551	0.48411	0.48462															1559.31281	-3E-6	-0.00104	2.23E-4	1488.91523	1.45E-4	0.00151
							1741.57	0.02901	0.02877	3255.5597	-140040	3255.5597	-36561		3255.5597	0.48595	0.48622	0.48533	0.48562	0.48486	0.4853	0.48432	0.48476	0.48412	0.4848	0.48344	0.48395															1558.34848	0	-0.00112	2.72E-4	1487.95091	1.64E-4	0.00155
							1742.53	0.02823	0.02801	3254.59538	-139270	3254.59538	-36721		3254.59538	0.48523	0.4855	0.4846	0.4849	0.48414	0.48458	0.48361	0.48408	0.48345	0.48408	0.48276	0.48327															1557.38416	-5E-6	-0.00122	2.6E-4	1486.98659	1.61E-4	0.00156
							1743.5	0.02747	0.02728	3253.63105	-137136	3253.63105	-40613		3253.63105	0.48452	0.48482	0.48387	0.48417	0.48341	0.48387	0.4829	0.4834	0.48279	0.48338	0.48209	0.48258															1556.41983	-6E-6	-0.00131	2.35E-4	1486.02227	1.37E-4	0.00154
							1744.46	0.02674	0.02657	3252.66673	-129525	3252.66673	-40246		3252.66673	0.48381	0.48414	0.48317	0.48346	0.48268	0.48318	0.48221	0.4827	0.48211	0.48269	0.48143	0.48192															1555.45551	-8E-6	-0.00138	2.4E-4	1485.05796	1.07E-4	0.00151
							1745.43	0.02605	0.0259	3251.70241	-118409	3251.7024	-28887		3251.70241	0.48309	0.48342	0.48249	0.48277	0.48198	0.48251	0.48152	0.482	0.48141	0.482	0.48076	0.48127															1554.49119	-2.3E-5	-0.00143	2.58E-4	1484.09364	8.3E-5	0.00148
							1746.39	0.02538	0.02524	3250.73808	-109133	3250.73808	-12535		3250.73808	0.48236	0.48269	0.48178	0.48207	0.48131	0.48183	0.48083	0.48129	0.48068	0.48131	0.48009	0.4806															1553.52686	-3.9E-5	-0.00149	2.67E-4	1483.12932	4.2E-5	0.00143
							1747.36	0.02471	0.02459	3249.77376	-103978	3249.77376	-2640		3249.77376	0.48163	0.48195	0.48105	0.48135	0.48062	0.48113	0.48014	0.48058	0.47995	0.48062	0.4794	0.47993															1552.56254	-5.7E-5	-0.00155	2.59E-4	1482.165	-2.7E-5	0.00134
							1748.32	0.02407	0.02397	3248.80943	-104753	3248.80943	245		3248.80943	0.48091	0.48121	0.48031	0.48061	0.4799	0.48041	0.47946	0.47989	0.47925	0.47994	0.47871	0.47926															1551.59821	-7.7E-5	-0.00159	2.5E-4	1481.20068	-8.7E-5	0.00121
							1749.28	0.02344	0.02337	3247.84511	-111037	3247.84511	6359		3247.84511	0.48017	0.48048	0.47959	0.4799	0.47918	0.4797	0.47877	0.47921	0.47859	0.47926	0.478	0.47859															1550.63389	-9.6E-5	-0.00161	2.49E-4	1480.23637	-1.14E-4	0.0011
							1750.25	0.02284	0.02278	3246.88078	-116349	3246.88078	22735		3246.88078	0.47944	0.47975	0.47888	0.4792	0.47847	0.47899	0.47809	0.47853	0.47794	0.47859	0.47734	0.47791															1549.66956	-1.28E-4	-0.0016	2.36E-4	1479.27205	-1.35E-4	0.00103
							1751.21	0.02226	0.02222	3245.91646	-120798	3245.91646	42767		3245.91646	0.47873	0.47901	0.47817	0.47851	0.47779	0.47827	0.47741	0.47783	0.47727	0.4779	0.4767	0.47724															1548.70524	-1.39E-4	-0.00158	2.42E-4	1478.30773	-1.63E-4	9.4915E-4
							1752.18	0.02169	0.02166	3244.95213	-133907	3244.95213	54442		3244.95213	0.47803	0.47826	0.47748	0.47781	0.47712	0.47756	0.47671	0.47712	0.47657	0.4772	0.47606	0.47657															1547.74091	-1.01E-4	-0.00156	2.79E-4	1477.34341	-1.8E-4	8.61967E-4
							1753.14	0.02113	0.02112	3243.98781	-155833	3243.98781	55324		3243.98781	0.47731	0.47753	0.47678	0.47711	0.47642	0.47686	0.47601	0.47642	0.47586	0.47652	0.47541	0.47592															1546.77659	-3.9E-5	-0.0015	3.06E-4	1476.37909	-1.81E-4	8.02122E-4
							1754.11	0.02059	0.0206	3243.02348	-172876	3243.02348	51059		3243.02348	0.47658	0.47682	0.47606	0.4764	0.4757	0.47616	0.4753	0.47574	0.47517	0.47585	0.47471	0.47526															1545.81226	4E-5	-0.00139	3.17E-4	1475.41477	-1.86E-4	7.89036E-4
							1755.07	0.02006	0.02009	3242.05916	-175709	3242.05916	46590		3242.05916	0.47585	0.4761	0.47533	0.47568	0.47497	0.47546	0.47458	0.47507	0.47448	0.47517	0.47402	0.4746															1544.84794	1.45E-4	-0.00127	3.3E-4	1474.45046	-2.05E-4	7.60806E-4
							1756.04	0.01955	0.0196	3241.09484	-171159	3241.09483	41276		3241.09484	0.47511	0.47538	0.47461	0.47497	0.47425	0.47476	0.47389	0.47441	0.47379	0.47446	0.47335	0.47393															1543.88362	2.59E-4	-0.00118	3.32E-4	1473.48614	-2.3E-4	6.91545E-4
							1757	0.01905	0.01912	3240.13051	-168721	3240.13051	28535		3240.13051	0.47438	0.47468	0.47391	0.47425	0.47354	0.47407	0.4732	0.47372	0.47312	0.47377	0.47267	0.47325															1542.91929	3.51E-4	-0.00108	3.19E-4	1472.52182	-2.45E-4	6.2783E-4
							1757.96	0.01857	0.01866	3239.16619	-166478	3239.16619	9310		3239.16619	0.47365	0.47398	0.47323	0.47353	0.47284	0.4734	0.47251	0.47302	0.47243	0.47309	0.47197	0.47257															1541.95497	4.09E-4	-9.31E-4	3.23E-4	1471.5575	-2.62E-4	5.90881E-4
							1758.93	0.0181	0.01821	3238.20186	-162315	3238.20186	-4456		3238.20186	0.47293	0.47327	0.47256	0.47283	0.47215	0.47272	0.47182	0.47231	0.47172	0.47242	0.4713	0.4719															1540.99064	4.51E-4	-7.7E-4	3.42E-4	1470.59318	-2.99E-4	5.6899E-4
							1759.89	0.01764	0.01777	3237.23754	-160991	3237.23754	-4743		3237.23754	0.47221	0.47256	0.47187	0.47215	0.47144	0.47203	0.47113	0.47161	0.47102	0.47174	0.47065	0.47125															1540.02632	5.05E-4	-6.47E-4	3.44E-4	1469.62886	-3.38E-4	5.38989E-4
							1760.86	0.0172	0.01733	3236.27321	-165027	3236.27321	3295		3236.27321	0.47149	0.47185	0.47113	0.47145	0.47073	0.47135	0.47044	0.47091	0.47035	0.47107	0.46997	0.4706															1539.06199	5.8E-4	-5.75E-4	3.31E-4	1468.66455	-3.54E-4	4.8562E-4
							1761.82	0.01678	0.0169	3235.30889	-170868	3235.30889	7597		3235.30889	0.47077	0.47114	0.47039	0.47075	0.47004	0.47065	0.46975	0.47023	0.46969	0.4704	0.46928	0.46994															1538.09767	6.66E-4	-5.29E-4	3.24E-4	1467.70023	-3.57E-4	4.23749E-4
							1762.79	0.01636	0.01649	3234.34456	-173482	3234.34456	1326		3234.34456	0.47005	0.47042	0.46969	0.47005	0.46937	0.46994	0.46907	0.46956	0.46902	0.46972	0.46861	0.46927															1537.13334	7.28E-4	-4.59E-4	3.29E-4	1466.73591	-3.69E-4	3.66644E-4
							1763.75	0.01595	0.01609	3233.38024	-172099	3233.38024	-10724		3233.38024	0.46933	0.4697	0.469	0.46934	0.46869	0.46923	0.4684	0.46889	0.46833	0.46903	0.46795	0.4686															1536.16902	7.46E-4	-3.63E-4	3.48E-4	1465.77159	-3.82E-4	3.12678E-4
							1764.71	0.01555	0.01571	3232.41591	-168507	3232.41591	-17589		3232.41591	0.46859	0.46898	0.46826	0.46863	0.46799	0.46853	0.4677	0.4682	0.46764	0.46831	0.46728	0.46793															1535.20469	7.3E-4	-3.04E-4	3.64E-4	1464.80727	-3.91E-4	2.51565E-4
							1765.68	0.01515	0.01533	3231.45159	-163986	3231.45159	-15975		3231.45159	0.46786	0.46827	0.46753	0.46793	0.46728	0.46784	0.46699	0.46751	0.46696	0.46761	0.4666	0.46729															1534.24037	7.04E-4	-3.17E-4	3.61E-4	1463.84295	-4.13E-4	1.89564E-4
							1766.64	0.01477	0.01496	3230.48727	-162042	3230.48726	-11918		3230.48727	0.46715	0.46756	0.46683	0.46724	0.46658	0.46716	0.46628	0.46682	0.46629	0.46694	0.46592	0.46665															1533.27605	6.9E-4	-3.62E-4	3.53E-4	1462.87864	-4.45E-4	1.59358E-4
							1767.61	0.0144	0.0146	3229.52294	-166210	3229.52294	-10904		3229.52294	0.46644	0.46683	0.46613	0.46652	0.46588	0.46646	0.46558	0.46613	0.4656	0.46628	0.46525	0.46598															1532.31172	6.77E-4	-3.94E-4	3.69E-4	1461.91432	-4.75E-4	1.58023E-4
							1768.57	0.01403	0.01424	3228.55862	-174138	3228.55862	-15136		3228.55862	0.46573	0.46612	0.46543	0.46582	0.46519	0.46574	0.46489	0.46544	0.46492	0.46561	0.4646	0.46531															1531.3474	6.44E-4	-4.34E-4	4.01E-4	1460.95	-4.89E-4	1.32215E-4
							1769.54	0.01368	0.0139	3227.59429	-180197	3227.59429	-20955		3227.59429	0.46501	0.4654	0.46473	0.46512	0.46449	0.46502	0.4642	0.46474	0.46424	0.46495	0.46396	0.46465															1530.38307	6.02E-4	-5.16E-4	4.07E-4	1459.98568	-4.84E-4	6.43171E-5
							1770.5	0.01333	0.01357	3226.62997	-183395	3226.62997	-20022		3226.62997	0.46426	0.46467	0.46402	0.46442	0.46377	0.46433	0.46349	0.46403	0.46354	0.46428	0.4633	0.46398															1529.41875	5.86E-4	-6.23E-4	3.87E-4	1459.02136	-4.83E-4	7.4857E-6
							1771.46	0.01299	0.01325	3225.66564	-188036	3225.66564	-12743		3225.66564	0.46349	0.46391	0.46329	0.46371	0.46304	0.46365	0.46279	0.46335	0.46282	0.46357	0.46261	0.4633															1528.45442	5.99E-4	-6.95E-4	3.69E-4	1458.05704	-4.95E-4	-1.37916E-5
							1772.43	0.01266	0.01293	3224.70132	-196833	3224.70132	-10346		3224.70132	0.46274	0.46315	0.46255	0.463	0.46233	0.46296	0.46209	0.46268	0.46211	0.46285	0.46191	0.46264															1527.4901	5.96E-4	-6.9E-4	3.59E-4	1457.09273	-5.01E-4	-2.34248E-5
							1773.39	0.01236	0.01261	3223.73699	-205716	3223.73699	-19030		3223.73699	0.46201	0.46242	0.46181	0.46228	0.46162	0.46225	0.46139	0.46198	0.4614	0.46214	0.46121	0.46198															1526.52577	5.75E-4	-6.53E-4	3.57E-4	1456.12841	-4.92E-4	-1.59555E-5
							1774.36	0.01205	0.01228	3222.77267	-208558	3222.77267	-35476		3222.77267	0.46128	0.46171	0.46107	0.46154	0.46091	0.46153	0.46068	0.46126	0.4607	0.46145	0.46051	0.46129															1525.56145	5.82E-4	-6.47E-4	3.58E-4	1455.16409	-4.84E-4	3.1E-6
							1775.32	0.01175	0.01197	3221.80834	-205985	3221.80834	-53661		3221.80834	0.46054	0.461	0.46035	0.46079	0.4602	0.46081	0.45996	0.46054	0.46001	0.46076	0.45982	0.4606															1524.59712	5.97E-4	-6.4E-4	3.53E-4	1454.19977	-4.86E-4	1.45231E-5
							1776.29	0.01145	0.01168	3220.84402	-202831	3220.84402	-66012		3220.84402	0.45978	0.46026	0.45962	0.46004	0.45946	0.46009	0.45922	0.45983	0.4593	0.46006	0.45911	0.45991															1523.6328	5.95E-4	-5.97E-4	3.41E-4	1453.23545	-4.84E-4	2.81439E-5
							1777.25	0.01115	0.01139	3219.8797	-199384	3219.87969	-69753		3219.8797	0.45899	0.4595	0.45887	0.4593	0.45871	0.45936	0.45848	0.45912	0.45858	0.45934	0.45839	0.45923															1522.66848	6.02E-4	-5.36E-4	3.29E-4	1452.27114	-4.75E-4	3.623E-5
							1778.21	0.01086	0.01111	3218.91537	-193393	3218.91537	-69581		3218.91537	0.4582	0.45874	0.45811	0.45855	0.45794	0.45862	0.45775	0.4584	0.45785	0.45861	0.45767	0.45853															1521.70415	6.33E-4	-4.64E-4	3.21E-4	1451.30682	-4.74E-4	2.5346E-5
							1779.18	0.01057	0.01084	3217.95105	-186215	3217.95105	-70650		3217.95105	0.45743	0.45798	0.45734	0.4578	0.45718	0.45787	0.45701	0.45767	0.45713	0.45788	0.45696	0.45782															1520.73983	6.92E-4	-3.73E-4	3.15E-4	1450.3425	-4.93E-4	1.72267E-5
							1780.14	0.01029	0.01057	3216.98672	-179801	3216.98672	-75558		3216.98672	0.45666	0.4572	0.45657	0.45705	0.45642	0.45711	0.45627	0.45693	0.4564	0.45715	0.45625	0.4571															1519.7755	7.8E-4	-2.88E-4	3.11E-4	1449.37818	-5.29E-4	2.76755E-5
							1781.11	0.01001	0.01029	3216.0224	-172527	3216.0224	-79473		3216.0224	0.45586	0.45642	0.45581	0.4563	0.45566	0.45637	0.45553	0.45618	0.45564	0.45643	0.45553	0.45639															1518.81118	8.55E-4	-2.21E-4	3.13E-4	1448.41386	-5.63E-4	3.60706E-5
							1782.07	0.00975	0.01003	3215.05807	-166247	3215.05807	-74376		3215.05807	0.45507	0.45564	0.45505	0.45554	0.45491	0.45563	0.4548	0.45545	0.45489	0.45569	0.45479	0.45568															1517.84685	8.88E-4	-1.46E-4	3.25E-4	1447.44954	-5.77E-4	3.12901E-5
							1783.04	0.00949	0.00977	3214.09375	-169689	3214.09375	-62765		3214.09375	0.45427	0.45487	0.45426	0.45477	0.45415	0.45487	0.45405	0.45473	0.45415	0.45494	0.45404	0.45497															1516.88253	8.91E-4	-6E-5	3.47E-4	1446.48523	-5.62E-4	3.82331E-5
							1784	0.00924	0.00951	3213.12942	-184740	3213.12942	-53706		3213.12942	0.45345	0.45408	0.45347	0.454	0.45339	0.4541	0.45328	0.45398	0.4534	0.45418	0.45328	0.45426															1515.9182	8.82E-4	1.5E-5	3.76E-4	1445.52091	-5.4E-4	6.66876E-5
							1784.96	0.00899	0.00926	3212.1651	-200897	3212.1651	-56208		3212.1651	0.45263	0.45329	0.45268	0.45322	0.45263	0.45335	0.45251	0.45321	0.45263	0.45344	0.45253	0.45353															1514.95388	8.89E-4	7.1E-5	3.89E-4	1444.55659	-5.32E-4	1.06423E-4
							1785.93	0.00876	0.00904	3211.20077	-209432	3211.20077	-72018		3211.20077	0.45182	0.4525	0.45188	0.45244	0.45185	0.45258	0.45174	0.45243	0.45184	0.45271	0.45178	0.45279															1513.98955	9.26E-4	9.1E-5	3.74E-4	1443.59227	-5.23E-4	1.63683E-4
							1786.89	0.00853	0.0088	3210.23645	-211959	3210.23645	-86393		3210.23645	0.45103	0.45168	0.45107	0.45165	0.45104	0.4518	0.45096	0.45164	0.45107	0.45197	0.45103	0.45201															1513.02523	9.38E-4	7.9E-5	3.49E-4	1442.62795	-5.11E-4	2.23359E-4
							1787.86	0.0083	0.00856	3209.27212	-212574	3209.27212	-86298		3209.27212	0.45023	0.45084	0.45024	0.45085	0.45023	0.45101	0.45018	0.45085	0.45031	0.4512	0.45029	0.45123															1512.06091	8.85E-4	7.5E-5	3.31E-4	1441.66363	-5.21E-4	2.43156E-4
							1788.82	0.00808	0.00834	3208.3078	-209145	3208.3078	-78460		3208.3078	0.4494	0.45001	0.44943	0.45005	0.44944	0.45023	0.44941	0.45007	0.44954	0.4504	0.44955	0.45049															1511.09658	8.16E-4	9.9E-5	3.21E-4	1440.69932	-5.39E-4	2.32034E-4
							1789.79	0.00785	0.00812	3207.34348	-199669	3207.34348	-74553		3207.34348	0.44856	0.44919	0.44861	0.44925	0.44865	0.44944	0.44862	0.44928	0.44875	0.44958	0.44879	0.44977															1510.13226	7.72E-4	1.26E-4	3.06E-4	1439.735	-5.47E-4	2.37831E-4
							1790.75	0.00762	0.00789	3206.37915	-188933	3206.37915	-78190		3206.37915	0.44772	0.44836	0.44778	0.44845	0.44783	0.44862	0.44782	0.44849	0.44797	0.44877	0.44802	0.44901															1509.16793	7.43E-4	1.21E-4	2.74E-4	1438.77068	-5.74E-4	2.54805E-4
							1791.72	0.00741	0.00768	3205.41483	-179530	3205.41483	-87134		3205.41483	0.44688	0.4475	0.44696	0.44763	0.44699	0.44778	0.44701	0.44769	0.44719	0.44799	0.44724	0.44824															1508.20361	7.42E-4	8.4E-5	2.54E-4	1437.80636	-6.15E-4	2.57964E-4
							1792.68	0.00721	0.00747	3204.4505	-169156	3204.4505	-93633		3204.4505	0.44604	0.44666	0.44613	0.4468	0.44617	0.44694	0.44619	0.44689	0.4464	0.44721	0.44645	0.44747															1507.23928	7.67E-4	8E-5	2.63E-4	1436.84204	-6.06E-4	2.70729E-4
							1793.64	0.007	0.00727	3203.48618	-159556	3203.48618	-91874		3203.48618	0.44518	0.44581	0.44528	0.44594	0.44536	0.44611	0.44537	0.44607	0.44558	0.44641	0.44564	0.44669															1506.27496	7.89E-4	1.43E-4	2.84E-4	1435.87772	-5.44E-4	3.01264E-4
							1794.61	0.0068	0.00707	3202.52185	-154132	3202.52185	-86014		3202.52185	0.44428	0.44496	0.44442	0.44508	0.44452	0.4453	0.44453	0.44526	0.44475	0.4456	0.44482	0.4459															1505.31063	8.01E-4	2.15E-4	2.94E-4	1434.91341	-4.88E-4	3.33188E-4
							1795.57	0.00661	0.00688	3201.55753	-151094	3201.55753	-83795		3201.55753	0.44336	0.44409	0.44356	0.44423	0.44367	0.44448	0.44368	0.44443	0.44393	0.44478	0.44399	0.4451															1504.34631	8.1E-4	2.44E-4	2.86E-4	1433.94909	-4.57E-4	3.70349E-4
							1796.54	0.00641	0.00668	3200.5932	-148051	3200.5932	-89276		3200.5932	0.44246	0.44321	0.44271	0.4434	0.44281	0.44365	0.44283	0.44359	0.4431	0.44395	0.44318	0.44427															1503.38198	7.98E-4	2.67E-4	2.71E-4	1432.98477	-4.65E-4	4.0249E-4
							1797.5	0.0062	0.00648	3199.62888	-147642	3199.62888	-96340		3199.62888	0.44157	0.44232	0.44185	0.44255	0.44194	0.44279	0.44198	0.44274	0.44225	0.44311	0.44235	0.44345															1502.41766	7.73E-4	3.12E-4	2.61E-4	1432.02045	-5.03E-4	4.21653E-4
							1798.47	0.00602	0.0063	3198.66455	-151141	3198.66455	-93962		3198.66455	0.44067	0.44144	0.44098	0.44168	0.44107	0.44193	0.44115	0.44188	0.44139	0.44227	0.44153	0.44264															1501.45334	7.67E-4	3.33E-4	2.59E-4	1431.05613	-5.11E-4	4.43064E-4
							1799.43	0.00586	0.00612	3197.70023	-152701	3197.70023	-84530		3197.70023	0.43977	0.44056	0.44011	0.4408	0.44021	0.44107	0.4403	0.44101	0.44052	0.44142	0.4407	0.44184															1500.48901	7.67E-4	3.15E-4	2.71E-4	1430.09182	-4.93E-4	4.68672E-4
							1800.39	0.00568	0.00593	3196.73591	-148537	3196.73591	-77082		3196.73591	0.43888	0.43966	0.43921	0.4399	0.43934	0.44018	0.43943	0.44015	0.43965	0.44056	0.43986	0.441															1499.52469	7.44E-4	3.05E-4	2.82E-4	1429.1275	-5.04E-4	4.82246E-4
							1801.36	0.0055	0.00575	3195.77158	-143600	3195.77158	-73281		3195.77158	0.43799	0.43874	0.43828	0.43901	0.43845	0.43926	0.43855	0.43929	0.43878	0.43969	0.439	0.44014															1498.56036	7.03E-4	3.25E-4	2.65E-4	1428.16318	-5.27E-4	4.74707E-4
							1802.32	0.00533	0.00558	3194.80726	-141394	3194.80726	-71997		3194.80726	0.43709	0.43784	0.43736	0.43809	0.43755	0.43836	0.43768	0.43843	0.43792	0.43881	0.43814	0.43929															1497.59604	6.56E-4	3.47E-4	2.34E-4	1427.19886	-5.14E-4	4.68378E-4
							1803.29	0.00516	0.00541	3193.84293	-138917	3193.84293	-71676		3193.84293	0.43617	0.43695	0.43646	0.43716	0.43667	0.43747	0.43681	0.43757	0.43706	0.43795	0.43728	0.43844															1496.63171	6.04E-4	3.35E-4	2.14E-4	1426.23454	-4.78E-4	4.80329E-4
							1804.25	0.00499	0.00524	3192.87861	-134037	3192.87861	-69927		3192.87861	0.43521	0.43604	0.43556	0.43624	0.43578	0.43659	0.43592	0.4367	0.43618	0.43709	0.43642	0.43757															1495.66739	5.43E-4	2.89E-4	2.01E-4	1425.27022	-4.54E-4	4.97188E-4
							1805.22	0.00484	0.00509	3191.91428	-126733	3191.91428	-67401		3191.91428	0.43425	0.4351	0.43464	0.43534	0.43488	0.43571	0.43503	0.4358	0.43528	0.43622	0.43557	0.43671															1494.70306	4.86E-4	2.36E-4	1.76E-4	1424.30591	-4.46E-4	5.20616E-4
							1806.18	0.00468	0.00492	3190.94996	-118596	3190.94996	-67661		3190.94996	0.4333	0.43416	0.43372	0.43444	0.43394	0.43481	0.43413	0.43487	0.43439	0.43533	0.4347	0.43584															1493.73874	4.58E-4	1.87E-4	1.51E-4	1423.34159	-4.46E-4	5.64547E-4
							1807.14	0.00453	0.00476	3189.98563	-115232	3189.98563	-72300		3189.98563	0.43234	0.43321	0.43279	0.43353	0.433	0.43391	0.4332	0.43396	0.43349	0.43444	0.43381	0.43499															1492.77441	4.45E-4	1.27E-4	1.5E-4	1422.37727	-4.52E-4	6.2352E-4
							1808.11	0.00437	0.00461	3189.02131	-119726	3189.02131	-78122		3189.02131	0.43138	0.43227	0.43183	0.4326	0.43208	0.43298	0.43227	0.43307	0.43258	0.43354	0.4329	0.43413															1491.81009	4.1E-4	5.5E-5	1.62E-4	1421.41295	-4.7E-4	6.62219E-4
							1809.07	0.00422	0.00445	3188.05698	-127188	3188.05698	-80769		3188.05698	0.43042	0.43132	0.43086	0.43167	0.43116	0.43205	0.43135	0.43218	0.43166	0.43263	0.43199	0.43326															1490.84577	3.49E-4	-6E-6	1.69E-4	1420.44863	-4.84E-4	6.48934E-4
							1810.04	0.00406	0.00429	3187.09266	-131469	3187.09266	-79729		3187.09266	0.42945	0.43038	0.42992	0.43073	0.43023	0.43113	0.43043	0.43127	0.43076	0.43171	0.43112	0.43237															1489.88144	2.87E-4	-4.5E-5	1.76E-4	1419.48431	-4.57E-4	6.10345E-4
							1811	0.00391	0.00413	3186.12834	-131105	3186.12834	-78384		3186.12834	0.42848	0.42943	0.42899	0.42979	0.42928	0.4302	0.4295	0.43035	0.42987	0.43077	0.43024	0.43147															1488.91712	2.5E-4	-7.8E-5	1.72E-4	1418.52	-4.07E-4	5.90346E-4
							1811.97	0.00378	0.00399	3185.16401	-126001	3185.16401	-77262		3185.16401	0.4275	0.42845	0.42804	0.42883	0.42832	0.42926	0.42855	0.4294	0.42896	0.42982	0.42935	0.43056															1487.95279	2.37E-4	-1.25E-4	1.56E-4	1417.55568	-3.92E-4	5.7792E-4
							1812.93	0.00364	0.00384	3184.19969	-116726	3184.19969	-73503		3184.19969	0.42652	0.42746	0.42706	0.42785	0.42737	0.42832	0.4276	0.42844	0.42801	0.42887	0.42843	0.42965															1486.98847	2.24E-4	-1.84E-4	1.51E-4	1416.59136	-4.31E-4	5.40229E-4
							1813.89	0.0035	0.0037	3183.23536	-107027	3183.23536	-66421		3183.23536	0.42553	0.42648	0.42609	0.42688	0.42642	0.42737	0.42668	0.4275	0.42706	0.42795	0.4275	0.42872															1486.02414	1.91E-4	-2.46E-4	1.58E-4	1415.62704	-4.82E-4	4.77372E-4
							1814.86	0.00336	0.00357	3182.27104	-98988	3182.27104	-56915		3182.27104	0.42454	0.4255	0.42512	0.42593	0.42547	0.42641	0.42577	0.42656	0.42611	0.42706	0.42656	0.42781															1485.05982	1.45E-4	-3.02E-4	1.59E-4	1414.66272	-5.08E-4	4.06583E-4
							1815.82	0.00323	0.00343	3181.30671	-91420	3181.30671	-44260		3181.30671	0.42355	0.42451	0.42413	0.42497	0.42452	0.42543	0.42483	0.42562	0.42518	0.42614	0.42563	0.42691															1484.09549	9.5E-5	-3.37E-4	1.59E-4	1413.6984	-5.07E-4	3.41037E-4
							1816.79	0.0031	0.00328	3180.34239	-84628	3180.34239	-29253		3180.34239	0.42254	0.42351	0.42311	0.42399	0.42355	0.42446	0.42385	0.42466	0.42424	0.42518	0.4247	0.42601															1483.13117	5.2E-5	-3.55E-4	1.76E-4	1412.73409	-5.08E-4	2.92589E-4
							1817.75	0.00298	0.00314	3179.37806	-77105	3179.37806	-19032		3179.37806	0.42154	0.42251	0.42211	0.42302	0.42259	0.42349	0.42287	0.4237	0.42328	0.42421	0.42378	0.42509															1482.16684	3.5E-5	-3.7E-4	1.91E-4	1411.76977	-5.46E-4	2.76333E-4
							1818.72	0.00286	0.00301	3178.41374	-65071	3178.41374	-18356		3178.41374	0.42053	0.4215	0.42113	0.42205	0.42161	0.42251	0.42187	0.42273	0.42232	0.42325	0.42284	0.42416															1481.20252	4.5E-5	-3.76E-4	1.85E-4	1410.80545	-5.92E-4	2.9106E-4
							1819.68	0.00273	0.00287	3177.44941	-49766	3177.44941	-19808		3177.44941	0.41952	0.4205	0.42016	0.42107	0.42061	0.42154	0.42087	0.42178	0.42136	0.4223	0.42189	0.42323															1480.23819	6.3E-5	-3.81E-4	1.78E-4	1409.84113	-5.99E-4	2.97099E-4
							1820.64	0.00259	0.00274	3176.48509	-35596	3176.48509	-16369		3176.48509	0.41853	0.41951	0.41919	0.42008	0.41964	0.42057	0.41989	0.42081	0.42041	0.42135	0.42095	0.42229															1479.27387	8.1E-5	-4.03E-4	1.83E-4	1408.87681	-5.76E-4	2.67985E-4
							1821.61	0.00246	0.00263	3175.52077	-27845	3175.52077	-12671		3175.52077	0.41754	0.41851	0.41823	0.4191	0.41869	0.4196	0.41894	0.41985	0.41945	0.42041	0.42	0.42137															1478.30955	8.7E-5	-4.32E-4	1.81E-4	1407.91249	-5.38E-4	2.40665E-4
							1822.57	0.00234	0.0025	3174.55644	-30905	3174.55644	-13504		3174.55644	0.41652	0.4175	0.41727	0.41812	0.41771	0.41864	0.41799	0.4189	0.41848	0.41947	0.41906	0.42043															1477.34522	7.8E-5	-4.53E-4	1.68E-4	1406.94818	-5.01E-4	2.55086E-4
							1823.54	0.00223	0.00236	3173.59212	-39095	3173.59212	-15583		3173.59212	0.4155	0.4165	0.41628	0.41714	0.41671	0.41767	0.41702	0.41796	0.41752	0.41849	0.41812	0.41948															1476.3809	8.3E-5	-4.63E-4	1.66E-4	1405.98386	-4.79E-4	2.94317E-4
							1824.5	0.00212	0.00224	3172.62779	-42936	3172.62779	-16726		3172.62779	0.41448	0.41552	0.41526	0.41616	0.41572	0.4167	0.41607	0.41698	0.41657	0.41752	0.41718	0.41853															1475.41657	1.06E-4	-4.64E-4	1.76E-4	1405.01954	-4.64E-4	3.25638E-4
							1825.47	0.00199	0.00212	3171.66347	-42497	3171.66347	-15882		3171.66347	0.41347	0.41453	0.41423	0.41515	0.41473	0.41571	0.4151	0.41599	0.4156	0.41655	0.41624	0.41759															1474.45225	1.09E-4	-4.65E-4	1.84E-4	1404.05522	-4.52E-4	3.52702E-4
							1826.43	0.00186	0.002	3170.69914	-42260	3170.69914	-9911		3170.69914	0.41247	0.41352	0.41324	0.41414	0.41373	0.41472	0.41411	0.415	0.41461	0.41559	0.41528	0.41666															1473.48792	8.5E-5	-4.7E-4	1.89E-4	1403.0909	-4.33E-4	3.94457E-4
							1827.4	0.00175	0.00189	3169.73482	-42753	3169.73482	-2538		3169.73482	0.41145	0.41249	0.41224	0.41314	0.41274	0.41374	0.41313	0.41402	0.41364	0.41464	0.41431	0.41571															1472.5236	7.7E-5	-4.68E-4	1.9E-4	1402.12659	-3.78E-4	4.49176E-4
							1828.36	0.00165	0.00178	3168.77049	-42176	3168.77049	-2136		3168.77049	0.41042	0.41148	0.41124	0.41216	0.41178	0.41278	0.41215	0.41305	0.41268	0.41368	0.41334	0.41477															1471.55927	1.07E-4	-4.5E-4	1.89E-4	1401.16227	-2.93E-4	5.07215E-4
							1829.32	0.00155	0.00166	3167.80617	-40262	3167.80617	-8146		3167.80617	0.40942	0.41047	0.41025	0.41117	0.41082	0.4118	0.41119	0.41208	0.41174	0.41271	0.41239	0.41383															1470.59495	1.42E-4	-4.25E-4	2.01E-4	1400.19795	-2.37E-4	5.45068E-4
							1830.29	0.00144	0.00153	3166.84184	-39045	3166.84184	-9873		3166.84184	0.40842	0.40946	0.40926	0.41018	0.40983	0.4108	0.41021	0.41111	0.41077	0.41174	0.41145	0.41289															1469.63062	1.63E-4	-4.21E-4	2.16E-4	1399.23363	-2.39E-4	5.38118E-4
							1831.25	0.00135	0.00141	3165.87752	-39168	3165.87752	2022		3165.87752	0.40741	0.40844	0.40826	0.40919	0.40882	0.4098	0.40922	0.41013	0.4098	0.41077	0.4105	0.41195															1468.6663	1.91E-4	-4.39E-4	2.08E-4	1398.26931	-2.72E-4	5.09933E-4
							1832.22	0.00125	0.0013	3164.9132	-37557	3164.91319	22701		3164.9132	0.40639	0.40742	0.40726	0.40819	0.40783	0.40883	0.40824	0.40916	0.40884	0.40981	0.40955	0.41103															1467.70198	2.29E-4	-4.47E-4	1.9E-4	1397.30499	-3.06E-4	5.05924E-4
							1833.18	0.00114	0.00119	3163.94887	-31173	3163.94887	38834		3163.94887	0.40538	0.40642	0.40627	0.4072	0.40686	0.40787	0.40729	0.40821	0.40788	0.40886	0.40863	0.41011															1466.73765	2.55E-4	-4.44E-4	1.91E-4	1396.34068	-3.15E-4	5.50192E-4
							1834.15	0.00105	0.00109	3162.98455	-20489	3162.98455	45397		3162.98455	0.40438	0.40544	0.40528	0.40621	0.40591	0.4069	0.40637	0.40728	0.40693	0.40789	0.40773	0.40916															1465.77333	2.56E-4	-4.42E-4	1.99E-4	1395.37636	-2.8E-4	6.19191E-4
							1835.11	9.54143E-4	9.94797E-4	3162.02022	-9774	3162.02022	45479		3162.02022	0.40337	0.40447	0.4043	0.40523	0.40496	0.40592	0.40543	0.40632	0.40597	0.40693	0.4068	0.4082															1464.809	2.51E-4	-4.37E-4	1.99E-4	1394.41204	-2.21E-4	6.50417E-4
							1836.07	8.51499E-4	8.93959E-4	3161.0559	-4208	3161.0559	43207		3161.0559	0.40236	0.40349	0.40333	0.40426	0.404	0.40494	0.40446	0.40534	0.40502	0.40598	0.40585	0.40727															1463.84468	2.58E-4	-4.38E-4	1.97E-4	1393.44772	-1.98E-4	6.40732E-4
							1837.04	7.51576E-4	7.95998E-4	3160.09157	-4745	3160.09157	42146		3160.09157	0.40134	0.40249	0.40234	0.40327	0.40301	0.40397	0.40349	0.40435	0.40407	0.40503	0.40489	0.40634															1462.88035	2.55E-4	-4.4E-4	2E-4	1392.4834	-2.32E-4	6.44701E-4
							1838	6.64898E-4	6.99147E-4	3159.12725	-6177	3159.12725	38667		3159.12725	0.40034	0.40147	0.40135	0.40229	0.40202	0.40301	0.40253	0.40339	0.40311	0.40407	0.40394	0.40541															1461.91603	2.21E-4	-4.37E-4	2.21E-4	1391.51908	-2.95E-4	6.61904E-4
							1838.97	5.79378E-4	5.91224E-4	3158.16292	-2551	3158.16292	28813		3158.16292	0.39937	0.40047	0.40037	0.40131	0.40106	0.40206	0.40157	0.40245	0.40215	0.40312	0.40301	0.40448															1460.9517	1.89E-4	-4.44E-4	2.46E-4	1390.55477	-3.56E-4	6.51446E-4
							1839.93	4.8654E-4	4.81798E-4	3157.1986	4070	3157.1986	22162		3157.1986	0.39841	0.39949	0.3994	0.40036	0.40012	0.4011	0.40062	0.40151	0.40119	0.40219	0.4021	0.40356															1459.98738	1.96E-4	-4.6E-4	2.43E-4	1389.59045	-3.84E-4	6.30939E-4
							1840.9	3.98594E-4	3.84706E-4	3156.23427	8411	3156.23427	27873		3156.23427	0.39743	0.39852	0.39842	0.39941	0.39917	0.40013	0.39967	0.40057	0.40028	0.40125	0.40119	0.40264															1459.02305	2.2E-4	-4.71E-4	2.2E-4	1388.62613	-3.83E-4	6.42511E-4
							1841.86	3.19835E-4	2.90745E-4	3155.26995	11301	3155.26995	40515		3155.26995	0.39644	0.39753	0.39744	0.39845	0.3982	0.39917	0.39873	0.39962	0.39938	0.4003	0.40028	0.40174															1458.05873	2.1E-4	-4.71E-4	2.15E-4	1387.66181	-3.78E-4	6.67819E-4
							1842.82	2.36559E-4	1.99342E-4	3154.30563	14544	3154.30562	51970		3154.30563	0.39546	0.39654	0.39648	0.39747	0.39725	0.39822	0.39779	0.39868	0.39844	0.39936	0.39937	0.40084															1457.09441	1.69E-4	-4.72E-4	2.35E-4	1386.69749	-3.8E-4	6.84231E-4
							1843.79	1.48844E-4	1.19351E-4	3153.3413	17174	3153.3413	56920		3153.3413	0.39448	0.39556	0.39554	0.39649	0.39629	0.39726	0.39684	0.39774	0.39748	0.39844	0.39846	0.39992															1456.13008	1.37E-4	-5.07E-4	2.56E-4	1385.73317	-3.93E-4	7.13396E-4
							1844.75	6.99754E-4	4.1083E-5	3152.37698	17993	3152.37698	51972		3152.37698	0.39349	0.3946	0.39457	0.39553	0.39532	0.3963	0.39589	0.39681	0.39655	0.39751	0.39755	0.39898															1455.16576	1.27E-4	-5.52E-4	2.5E-4	1384.76886	-4E-4	7.62819E-4
							1845.72	-3.88288E-5	-4.72134E-4	3151.41265	15707	3151.41265	41411		3151.41265	0.39252	0.39364	0.39361	0.39459	0.39436	0.39535	0.39496	0.39588	0.39563	0.39657	0.39665	0.39807															1454.20143	1.16E-4	-5.79E-4	2.3E-4	1383.80454	-3.94E-4	7.97786E-4
							1846.68	-7.95144E-4	-1.35518E-4	3150.44833	12890	3150.44833	34780		3150.44833	0.39157	0.39267	0.39265	0.39364	0.39342	0.39442	0.39404	0.39495	0.3947	0.39563	0.39575	0.39718															1453.23711	1E-4	-5.96E-4	2.3E-4	1382.84022	-3.99E-4	7.7821E-4
							1847.65	-1.53839E-4	-2.16249E-4	3149.484	14373	3149.484	35174		3149.484	0.39063	0.39171	0.3917	0.3927	0.3925	0.3935	0.39312	0.39403	0.39378	0.39472	0.39484	0.39628															1452.27278	1.06E-4	-5.78E-4	2.35E-4	1381.8759	-4.19E-4	7.11925E-4
							1848.61	-2.29496E-4	-3.01467E-4	3148.51968	18620	3148.51968	36199		3148.51968	0.38967	0.39077	0.39077	0.39175	0.39158	0.39259	0.3922	0.39311	0.39287	0.39383	0.39394	0.39539															1451.30846	1.37E-4	-5.25E-4	2.31E-4	1380.91158	-4.38E-4	6.59828E-4
							1849.57	-3.06175E-4	-3.91582E-4	3147.55535	21837	3147.55535	33744		3147.55535	0.38872	0.38981	0.38984	0.39081	0.39066	0.39167	0.3913	0.39218	0.39196	0.39293	0.39303	0.39449															1450.34413	1.68E-4	-4.84E-4	2.38E-4	1379.94727	-4.62E-4	6.63656E-4
							1850.54	-3.76943E-4	-4.72834E-4	3146.59103	24518	3146.59103	34375		3146.59103	0.38777	0.38885	0.38892	0.38988	0.38974	0.39075	0.39038	0.39126	0.39105	0.39201	0.39214	0.3936															1449.37981	1.87E-4	-4.64E-4	2.35E-4	1378.98295	-4.85E-4	6.90417E-4
							1851.5	-4.48476E-4	-5.48074E-4	3145.6267	27401	3145.6267	44269		3145.6267	0.38682	0.3879	0.38798	0.38895	0.38881	0.38983	0.38946	0.39035	0.39016	0.39111	0.39125	0.39274															1448.41548	1.97E-4	-4.35E-4	2.1E-4	1378.01863	-4.89E-4	7.00514E-4
							1852.47	-5.28529E-4	-6.22629E-4	3144.66238	30275	3144.66238	58689		3144.66238	0.38587	0.38696	0.38705	0.38801	0.38789	0.3889	0.38854	0.38944	0.38925	0.39021	0.39037	0.39188															1447.45116	2.05E-4	-3.87E-4	1.97E-4	1377.05431	-4.83E-4	7.06547E-4
							1853.43	-6.04172E-4	-6.90141E-4	3143.69806	34427	3143.69805	70091		3143.69806	0.38493	0.38603	0.38614	0.38708	0.38699	0.38798	0.38763	0.38854	0.38834	0.3893	0.38949	0.39101															1446.48684	2.09E-4	-3.41E-4	1.95E-4	1376.08999	-4.77E-4	7.14518E-4
							1854.4	-6.67965E-4	-7.55885E-4	3142.73373	40173	3142.73373	76180		3142.73373	0.384	0.38511	0.38525	0.38617	0.3861	0.38707	0.38673	0.38765	0.38745	0.38839	0.38862	0.39012															1445.52251	2.04E-4	-3.23E-4	1.88E-4	1375.12567	-4.61E-4	7.07125E-4
							1855.36	-7.32989E-4	-8.30869E-4	3141.76941	45433	3141.76941	76823		3141.76941	0.38309	0.3842	0.38435	0.38529	0.38521	0.38618	0.38584	0.38676	0.38657	0.3875	0.38776	0.38923															1444.55819	2.03E-4	-3.25E-4	1.85E-4	1374.16136	-4.33E-4	6.84409E-4
							1856.32	-8.025E-4	-9.05117E-4	3140.80508	49739	3140.80508	74032		3140.80508	0.38217	0.38329	0.38343	0.38439	0.38432	0.38529	0.38495	0.38588	0.3857	0.38662	0.38689	0.38835															1443.59386	2.23E-4	-3.27E-4	1.86E-4	1373.19704	-4.09E-4	6.55316E-4
							1857.29	-8.62853E-4	-9.67833E-4	3139.84076	52538	3139.84076	73438		3139.84076	0.38126	0.38239	0.3825	0.38349	0.38341	0.38439	0.38406	0.385	0.38482	0.38574	0.38603	0.38747															1442.62954	2.46E-4	-3.26E-4	1.73E-4	1372.23272	-4.17E-4	6.27554E-4
							1858.25	-9.1576E-4	-0.00103	3138.87643	51540	3138.87643	77196		3138.87643	0.38035	0.38148	0.38158	0.3826	0.3825	0.38348	0.38318	0.38411	0.38394	0.38486	0.38517	0.38662															1441.66521	2.47E-4	-3.33E-4	1.5E-4	1371.2684	-4.62E-4	6.11338E-4
							1859.22	-9.75633E-4	-0.00111	3137.91211	48639	3137.91211	77423		3137.91211	0.37945	0.38057	0.3807	0.38172	0.38161	0.38259	0.38231	0.38323	0.38307	0.384	0.38433	0.38579															1440.70089	2.27E-4	-3.47E-4	1.45E-4	1370.30408	-4.91E-4	6.08644E-4
							1860.18	-0.00104	-0.00118	3136.94778	46643	3136.94778	68148		3136.94778	0.37856	0.37965	0.37982	0.38082	0.38074	0.3817	0.38145	0.38235	0.38222	0.38316	0.38351	0.38497															1439.73656	2.01E-4	-3.42E-4	1.62E-4	1369.33976	-4.77E-4	6.1825E-4
							1861.15	-0.0011	-0.00124	3135.98346	44649	3135.98346	55642		3135.98346	0.37765	0.37874	0.37895	0.37992	0.37987	0.38083	0.38059	0.38149	0.38137	0.3823	0.38268	0.38412															1438.77224	1.83E-4	-3.2E-4	1.72E-4	1368.37545	-4.54E-4	6.26118E-4
							1862.11	-0.00115	-0.0013	3135.01913	43687	3135.01913	48870		3135.01913	0.37676	0.37783	0.37808	0.37903	0.379	0.37997	0.37974	0.38063	0.38051	0.38143	0.38184	0.38327															1437.80791	1.77E-4	-3.31E-4	1.69E-4	1367.41113	-4.34E-4	5.94391E-4
							1863.08	-0.00121	-0.00136	3134.05481	45302	3134.05481	52067		3134.05481	0.37588	0.37693	0.37721	0.37815	0.37813	0.37911	0.37888	0.37977	0.37965	0.38057	0.381	0.38243															1436.84359	1.72E-4	-3.73E-4	1.69E-4	1366.44681	-4.18E-4	5.16597E-4
							1864.04	-0.00125	-0.00142	3133.09049	46702	3133.09048	63569		3133.09049	0.375	0.37606	0.37634	0.37727	0.37727	0.37824	0.37803	0.37891	0.37881	0.3797	0.38016	0.38162															1435.87927	1.59E-4	-3.74E-4	1.85E-4	1365.48249	-4.28E-4	4.4183E-4
							1865	-0.0013	-0.00147	3132.12616	46837	3132.12616	76760		3132.12616	0.37411	0.37518	0.37546	0.37641	0.37641	0.37737	0.3772	0.37805	0.37798	0.37883	0.37933	0.38082															1434.91494	1.56E-4	-3.29E-4	2.02E-4	1364.51817	-4.4E-4	3.99996E-4
							1865.97	-0.00136	-0.00153	3131.16184	48824	3131.16184	85886		3131.16184	0.37324	0.37431	0.3746	0.37556	0.37556	0.37651	0.37636	0.37722	0.37714	0.37798	0.37851	0.38002															1433.95062	1.74E-4	-2.98E-4	2E-4	1363.55385	-4.28E-4	3.67244E-4
							1866.93	-0.00142	-0.00159	3130.19751	53074	3130.19751	91697		3130.19751	0.37238	0.37345	0.37376	0.37472	0.37472	0.37567	0.37553	0.3764	0.37631	0.37716	0.37769	0.37922															1432.98629	1.96E-4	-3.01E-4	1.91E-4	1362.58954	-4.11E-4	2.97965E-4
							1867.9	-0.00147	-0.00164	3129.23319	58809	3129.23319	97686		3129.23319	0.37153	0.3726	0.37294	0.37388	0.3739	0.37484	0.37469	0.37558	0.37551	0.37636	0.37689	0.3784															1432.02197	2.01E-4	-3.18E-4	1.81E-4	1361.62522	-3.97E-4	1.50836E-4
							1868.86	-0.00152	-0.00169	3128.26886	67634	3128.26886	100741		3128.26886	0.37069	0.37175	0.3721	0.37305	0.37308	0.37401	0.37386	0.37476	0.3747	0.37554	0.37609	0.37759															1431.05764	1.77E-4	-3.3E-4	1.68E-4	1360.6609	-4.03E-4	-4.78445E-5
							1869.83	-0.00156	-0.00174	3127.30454	78087	3127.30454	96649		3127.30454	0.36984	0.37091	0.37124	0.37222	0.37225	0.37317	0.37304	0.37392	0.37389	0.37472	0.37529	0.37679															1430.09332	1.52E-4	-3.35E-4	1.71E-4	1359.69658	-4.36E-4	-2.02803E-4
							1870.79	-0.00161	-0.00178	3126.34021	85391	3126.34021	88530		3126.34021	0.36899	0.37009	0.37039	0.3714	0.37142	0.37235	0.37223	0.37309	0.37308	0.37391	0.37449	0.37599															1429.12899	1.63E-4	-3.34E-4	1.84E-4	1358.73226	-4.61E-4	-2.92757E-4
							1871.75	-0.00166	-0.00183	3125.37589	87457	3125.37589	83235		3125.37589	0.36816	0.36928	0.36957	0.37057	0.3706	0.37154	0.37142	0.37228	0.37228	0.37312	0.37371	0.37519															1428.16467	2E-4	-3.3E-4	1.87E-4	1357.76794	-4.57E-4	-3.79721E-4
							1872.72	-0.00171	-0.00187	3124.41156	85307	3124.41156	84129		3124.41156	0.36734	0.36845	0.36876	0.36974	0.3698	0.37075	0.37062	0.37149	0.37149	0.37235	0.37294	0.37442															1427.20034	2.18E-4	-3.27E-4	1.89E-4	1356.80363	-4.47E-4	-4.89636E-4
							1873.68	-0.00175	-0.00191	3123.44724	82195	3123.44724	90367		3123.44724	0.36654	0.36762	0.36796	0.36893	0.36901	0.36995	0.36984	0.37071	0.37072	0.37159	0.37218	0.37366															1426.23602	1.99E-4	-3.27E-4	1.95E-4	1355.83931	-4.57E-4	-6.15203E-4
							1874.65	-0.00179	-0.00195	3122.48291	80176	3122.48291	100003		3122.48291	0.36574	0.36681	0.36717	0.36814	0.36824	0.36917	0.36906	0.36995	0.36995	0.37081	0.37141	0.3729															1425.2717	1.78E-4	-3.24E-4	1.94E-4	1354.87499	-4.81E-4	-7.4602E-4
							1875.61	-0.00182	-0.00199	3121.51859	77359	3121.51859	107147		3121.51859	0.36493	0.36599	0.36637	0.36736	0.36747	0.36839	0.36829	0.36917	0.36917	0.37003	0.37066	0.37214															1424.30737	1.81E-4	-3.29E-4	1.91E-4	1353.91067	-4.95E-4	-8.70045E-4
							1876.58	-0.00185	-0.00202	3120.55427	74934	3120.55427	106404		3120.55427	0.36413	0.36519	0.36558	0.3666	0.36668	0.3676	0.36753	0.36839	0.3684	0.36925	0.36991	0.37138															1423.34305	1.91E-4	-3.35E-4	1.91E-4	1352.94635	-5.1E-4	-9.57919E-4
							1877.54	-0.00188	-0.00206	3119.58994	76119	3119.58994	100167		3119.58994	0.36334	0.36439	0.3648	0.36581	0.3659	0.36683	0.36677	0.36763	0.36763	0.36848	0.36916	0.37062															1422.37872	1.86E-4	-3.22E-4	1.96E-4	1351.98204	-5.21E-4	-9.64411E-4
							1878.5	-0.00192	-0.0021	3118.62562	78712	3118.62562	94145		3118.62562	0.36256	0.36362	0.36404	0.36502	0.36514	0.36608	0.366	0.36686	0.36687	0.36773	0.36843	0.36988															1421.4144	1.63E-4	-3.27E-4	2.11E-4	1351.01772	-5.17E-4	-9.1358E-4
							1879.47	-0.00196	-0.00214	3117.66129	79759	3117.66129	91452		3117.66129	0.36179	0.36286	0.36329	0.36426	0.36439	0.36534	0.36524	0.36611	0.36612	0.36699	0.3677	0.36916															1420.45007	1.52E-4	-3.62E-4	2.11E-4	1350.0534	-5.14E-4	-8.63804E-4
							1880.43	-0.002	-0.00218	3116.69697	80359	3116.69697	90705		3116.69697	0.36103	0.36212	0.36254	0.36352	0.36365	0.36459	0.3645	0.36536	0.3654	0.36625	0.36698	0.36846															1419.48575	1.69E-4	-3.78E-4	1.78E-4	1349.08908	-5.07E-4	-8.05028E-4
							1881.4	-0.00203	-0.00221	3115.73264	82308	3115.73264	91562		3115.73264	0.36029	0.36137	0.36181	0.36278	0.36292	0.36385	0.36377	0.36463	0.36468	0.36552	0.36628	0.36775															1418.52142	1.99E-4	-3.63E-4	1.56E-4	1348.12476	-4.77E-4	-7.26389E-4
							1882.36	-0.00207	-0.00224	3114.76832	85154	3114.76832	96934		3114.76832	0.35956	0.36061	0.36107	0.36203	0.36218	0.36311	0.36305	0.36392	0.36398	0.36481	0.36558	0.36704															1417.5571	2.29E-4	-3.34E-4	1.71E-4	1347.16044	-4.34E-4	-6.56163E-4
							1883.33	-0.0021	-0.00227	3113.80399	87966	3113.80399	104838		3113.80399	0.3588	0.35984	0.36032	0.36129	0.36144	0.36237	0.36232	0.3632	0.36327	0.36408	0.36487	0.36631															1416.59277	2.39E-4	-3.1E-4	1.88E-4	1346.19613	-4.05E-4	-5.85838E-4
							1884.29	-0.00213	-0.00231	3112.83967	89799	3112.83967	108153		3112.83967	0.35805	0.3591	0.35958	0.36056	0.36072	0.36163	0.36161	0.36248	0.36253	0.36335	0.36417	0.3656															1415.62845	2.23E-4	-3.11E-4	1.82E-4	1345.23181	-4.07E-4	-4.74046E-4
							1885.25	-0.00216	-0.00234	3111.87534	89172	3111.87534	105235		3111.87534	0.35731	0.35839	0.35886	0.35985	0.36003	0.36092	0.36092	0.36177	0.36181	0.36264	0.36348	0.36492															1414.66413	2.17E-4	-3.22E-4	1.68E-4	1344.26749	-4.14E-4	-3.1732E-4
							1886.22	-0.00218	-0.00236	3110.91102	86076	3110.91102	97723		3110.91102	0.35658	0.35767	0.35816	0.35914	0.35935	0.36021	0.36023	0.36108	0.36112	0.36196	0.3628	0.36426															1413.6998	2.35E-4	-3.26E-4	1.69E-4	1343.30317	-3.78E-4	-1.50039E-4
							1887.18	-0.00219	-0.00239	3109.9467	82843	3109.9467	84234		3109.9467	0.35585	0.35695	0.35747	0.35842	0.35864	0.35951	0.35954	0.3604	0.36044	0.36128	0.36212	0.36358															1412.73548	2.56E-4	-3.33E-4	1.76E-4	1342.33885	-3.12E-4	7.3127E-6
							1888.15	-0.00222	-0.00243	3108.98237	82450	3108.98237	67521		3108.98237	0.35514	0.35624	0.35679	0.3577	0.35794	0.35883	0.35885	0.35972	0.35977	0.3606	0.36145	0.36291															1411.77115	2.71E-4	-3.17E-4	1.81E-4	1341.37453	-2.66E-4	1.53881E-4
							1889.11	-0.00225	-0.00247	3108.01805	84568	3108.01805	55273		3108.01805	0.35446	0.35554	0.35611	0.357	0.35725	0.35816	0.35817	0.35904	0.3591	0.35992	0.36079	0.36225															1410.80683	2.86E-4	-2.54E-4	1.88E-4	1340.41022	-2.5E-4	2.76689E-4
							1890.08	-0.00227	-0.00249	3107.05372	86622	3107.05372	52748		3107.05372	0.35377	0.35484	0.35543	0.35633	0.35657	0.35747	0.3575	0.35836	0.35842	0.35924	0.36014	0.3616															1409.8425	2.99E-4	-2.01E-4	1.88E-4	1339.4459	-2.38E-4	3.56286E-4
							1891.04	-0.00229	-0.0025	3106.0894	89180	3106.0894	59454		3106.0894	0.35307	0.35414	0.35473	0.35567	0.3559	0.35679	0.35683	0.35769	0.35774	0.35857	0.35948	0.36096															1408.87818	2.99E-4	-2E-4	1.78E-4	1338.48158	-2.28E-4	4.01167E-4
							1892	-0.00231	-0.00252	3105.12507	92789	3105.12507	68740		3105.12507	0.35238	0.35346	0.35404	0.355	0.35522	0.35612	0.35616	0.35701	0.35709	0.3579	0.35882	0.36031															1407.91385	3.12E-4	-2.03E-4	1.64E-4	1337.51726	-2.31E-4	4.23138E-4
							1892.97	-0.00232	-0.00254	3104.16075	94498	3104.16075	76412		3104.16075	0.35171	0.35279	0.35334	0.35432	0.35456	0.35546	0.35549	0.35635	0.35644	0.35725	0.35818	0.35964															1406.94953	3.57E-4	-1.89E-4	1.54E-4	1336.55294	-2.42E-4	4.16043E-4
							1893.93	-0.00233	-0.00256	3103.19642	92640	3103.19642	83722		3103.19642	0.35104	0.3521	0.35264	0.35364	0.3539	0.3548	0.35483	0.35569	0.3558	0.35659	0.35755	0.35897															1405.9852	3.92E-4	-1.94E-4	1.58E-4	1335.58862	-2.54E-4	4.02659E-4
							1894.9	-0.00234	-0.00258	3102.2321	89469	3102.2321	87404		3102.2321	0.35037	0.35141	0.35195	0.35298	0.35324	0.35414	0.35418	0.35504	0.35515	0.35594	0.3569	0.35832															1405.02088	3.83E-4	-2.32E-4	1.73E-4	1334.62431	-2.67E-4	3.94252E-4
							1895.86	-0.00235	-0.0026	3101.26777	86342	3101.26777	83416		3101.26777	0.3497	0.35074	0.35129	0.35232	0.35257	0.35348	0.35353	0.35439	0.35451	0.35531	0.35627	0.3577															1404.05655	3.48E-4	-2.84E-4	1.82E-4	1333.65999	-2.74E-4	3.54589E-4
							1896.83	-0.00237	-0.00262	3100.30345	82276	3100.30345	78002		3100.30345	0.34903	0.35009	0.35066	0.35167	0.35192	0.35282	0.35288	0.35374	0.35389	0.35469	0.35565	0.35709															1403.09223	3.14E-4	-3.23E-4	1.87E-4	1332.69567	-2.63E-4	2.99505E-4
							1897.79	-0.00238	-0.00264	3099.33913	77876	3099.33913	76980		3099.33913	0.34837	0.34945	0.35003	0.35103	0.35128	0.35218	0.35225	0.3531	0.35328	0.35408	0.35501	0.35648															1402.12791	3E-4	-3.4E-4	1.97E-4	1331.73135	-2.52E-4	2.7651E-4
							1898.76	-0.0024	-0.00265	3098.3748	74905	3098.3748	79046		3098.3748	0.34773	0.34881	0.34938	0.3504	0.35066	0.35156	0.35163	0.35248	0.35267	0.35345	0.35438	0.35586															1401.16358	3.18E-4	-3.45E-4	2.02E-4	1330.76703	-2.66E-4	2.72585E-4
							1899.72	-0.0024	-0.00266	3097.41048	73841	3097.41048	84205		3097.41048	0.34709	0.34817	0.34874	0.34977	0.35005	0.35096	0.35101	0.35188	0.35204	0.35282	0.35377	0.35525															1400.19926	3.52E-4	-3.32E-4	1.96E-4	1329.80272	-3E-4	2.71941E-4
							1900.68	-0.00241	-0.00267	3096.44615	74867	3096.44615	91925		3096.44615	0.34643	0.34752	0.34812	0.34914	0.34943	0.35036	0.3504	0.35127	0.35141	0.3522	0.35317	0.35465															1399.23493	3.72E-4	-3E-4	1.74E-4	1328.8384	-3.32E-4	2.91969E-4
							1901.65	-0.00242	-0.0027	3095.48183	77579	3095.48183	96500		3095.48183	0.34577	0.34688	0.34751	0.3485	0.3488	0.34974	0.34979	0.35065	0.35079	0.35159	0.35257	0.35404															1398.27061	3.73E-4	-2.6E-4	1.42E-4	1327.87408	-3.31E-4	3.18174E-4
							1902.61	-0.00244	-0.00272	3094.5175	79162	3094.5175	91140		3094.5175	0.34513	0.34625	0.34689	0.34789	0.34818	0.34912	0.34918	0.35004	0.35018	0.35099	0.35196	0.35344															1397.30628	3.56E-4	-2.35E-4	1.17E-4	1326.90976	-3.02E-4	3.11787E-4
							1903.58	-0.00244	-0.00272	3093.55318	76117	3093.55318	73447		3093.55318	0.34452	0.34566	0.34629	0.34731	0.34757	0.34852	0.34858	0.34945	0.34958	0.3504	0.35138	0.35287															1396.34196	3.28E-4	-2.49E-4	1.12E-4	1325.94544	-2.84E-4	2.82012E-4
							1904.54	-0.00244	-0.00272	3092.58885	68790	3092.58885	44671		3092.58885	0.3439	0.34506	0.34568	0.34674	0.34697	0.34792	0.34798	0.34887	0.34899	0.34982	0.35081	0.3523															1395.37763	3.01E-4	-2.96E-4	1.29E-4	1324.98112	-2.92E-4	2.66655E-4
							1905.51	-0.00244	-0.00272	3091.62453	61378	3091.62453	8477		3091.62453	0.34328	0.34444	0.34506	0.34613	0.34638	0.34733	0.34737	0.34827	0.34839	0.34923	0.35023	0.35172															1394.41331	2.93E-4	-3.52E-4	1.56E-4	1324.01681	-3E-4	2.85295E-4
							1906.47	-0.00244	-0.00273	3090.6602	55960	3090.6602	-25878		3090.6602	0.34266	0.34382	0.34444	0.34552	0.34578	0.34673	0.34678	0.34768	0.34779	0.34865	0.34963	0.35113															1393.44898	2.91E-4	-4.04E-4	1.75E-4	1323.05249	-2.93E-4	3.22676E-4
							1907.43	-0.00244	-0.00274	3089.69588	49809	3089.69588	-49412		3089.69588	0.34204	0.3432	0.34384	0.34491	0.34517	0.34612	0.34621	0.3471	0.34721	0.34805	0.34904	0.35055															1392.48466	2.64E-4	-4.26E-4	1.87E-4	1322.08817	-2.87E-4	3.37124E-4
							1908.4	-0.00244	-0.00274	3088.73156	41180	3088.73155	-60583		3088.73156	0.34142	0.34259	0.34324	0.3443	0.34455	0.34552	0.34564	0.34651	0.34663	0.34747	0.34847	0.34995															1391.52034	2.25E-4	-3.95E-4	2E-4	1321.12385	-2.88E-4	3.32336E-4
							1909.36	-0.00243	-0.00274	3087.76723	32414	3087.76723	-62236		3087.76723	0.3408	0.34198	0.34263	0.34368	0.34395	0.34491	0.34504	0.34591	0.34603	0.34688	0.34788	0.34935															1390.55601	2.09E-4	-3.49E-4	2.05E-4	1320.15953	-2.92E-4	3.40411E-4
							1910.33	-0.00242	-0.00273	3086.80291	25530	3086.80291	-58070		3086.80291	0.34016	0.34134	0.342	0.34303	0.34335	0.34428	0.34441	0.34529	0.34542	0.34627	0.34727	0.34875															1389.59169	2.11E-4	-3.22E-4	1.97E-4	1319.19521	-3.04E-4	3.53855E-4
							1911.29	-0.00243	-0.00273	3085.83858	20212	3085.83858	-50202		3085.83858	0.3395	0.34068	0.34135	0.34238	0.34272	0.34364	0.34377	0.34466	0.34479	0.34563	0.34663	0.34814															1388.62736	2.2E-4	-3.06E-4	1.94E-4	1318.2309	-3.19E-4	3.69485E-4
							1912.26	-0.00243	-0.00272	3084.87426	16813	3084.87426	-39390		3084.87426	0.33885	0.34002	0.3407	0.34176	0.34208	0.343	0.34314	0.34402	0.34416	0.34499	0.346	0.34752															1387.66304	2.38E-4	-3.14E-4	1.91E-4	1317.26658	-3.24E-4	4.06695E-4
							1913.22	-0.00242	-0.00271	3083.90993	17266	3083.90993	-29498		3083.90993	0.3382	0.33938	0.34006	0.34113	0.34144	0.34236	0.34251	0.34338	0.34354	0.34436	0.34539	0.3469															1386.69871	2.5E-4	-3.63E-4	1.74E-4	1316.30226	-3.35E-4	4.59263E-4
							1914.18	-0.00241	-0.00269	3082.94561	21257	3082.94561	-26531		3082.94561	0.33755	0.33873	0.33942	0.34051	0.3408	0.34171	0.34186	0.34272	0.34291	0.34373	0.34476	0.34628															1385.73439	2.33E-4	-4.18E-4	1.67E-4	1315.33794	-3.69E-4	4.90771E-4
							1915.15	-0.0024	-0.00269	3081.98128	26180	3081.98128	-30953		3081.98128	0.33689	0.33806	0.33878	0.33986	0.34016	0.34107	0.3412	0.34207	0.34226	0.34309	0.34413	0.34565															1384.77006	2.04E-4	-4.31E-4	1.85E-4	1314.37362	-4.1E-4	4.82659E-4
							1916.11	-0.0024	-0.00269	3081.01696	30394	3081.01696	-37380		3081.01696	0.33622	0.3374	0.33812	0.33917	0.33951	0.34043	0.34055	0.34143	0.34162	0.34245	0.34349	0.34501															1383.80574	1.84E-4	-4.06E-4	1.95E-4	1313.4093	-4.33E-4	4.54498E-4
							1917.08	-0.00239	-0.00267	3080.05263	31199	3080.05263	-40077		3080.05263	0.33554	0.33673	0.33744	0.33849	0.33884	0.33977	0.33993	0.34079	0.34098	0.34181	0.34285	0.34437															1382.84141	1.72E-4	-3.75E-4	1.81E-4	1312.44499	-4.38E-4	4.32985E-4
							1918.04	-0.00237	-0.00265	3079.08831	26318	3079.08831	-38265		3079.08831	0.33485	0.33606	0.33678	0.33783	0.33817	0.33911	0.3393	0.34016	0.34034	0.34117	0.34221	0.34373															1381.87709	1.82E-4	-3.49E-4	1.73E-4	1311.48067	-4.48E-4	4.29567E-4
							1919.01	-0.00235	-0.00264	3078.12399	19801	3078.12398	-40080		3078.12399	0.33418	0.33538	0.33613	0.33716	0.33752	0.33845	0.33865	0.33951	0.3397	0.34052	0.34158	0.34308															1380.91277	2.09E-4	-3.26E-4	1.8E-4	1310.51635	-4.67E-4	4.28453E-4
							1919.97	-0.00232	-0.00263	3077.15966	17931	3077.15966	-50107		3077.15966	0.33351	0.33469	0.33547	0.33649	0.33685	0.33778	0.33798	0.33884	0.33904	0.33985	0.34094	0.34243															1379.94844	2.13E-4	-2.98E-4	1.74E-4	1309.55203	-4.71E-4	4.13532E-4
							1920.93	-0.0023	-0.00261	3076.19534	20474	3076.19534	-60260		3076.19534	0.33282	0.334	0.33478	0.33581	0.33617	0.33711	0.3373	0.33817	0.33836	0.33918	0.34029	0.34179															1378.98412	1.93E-4	-2.79E-4	1.6E-4	1308.58771	-4.67E-4	4.11642E-4
							1921.9	-0.00228	-0.00259	3075.23101	22512	3075.23101	-64024		3075.23101	0.33213	0.33331	0.33409	0.33513	0.33548	0.33644	0.33662	0.33752	0.3377	0.33852	0.33963	0.34114															1378.01979	1.74E-4	-3.03E-4	1.53E-4	1307.6234	-4.76E-4	4.45282E-4
							1922.86	-0.00226	-0.00256	3074.26669	20842	3074.26669	-61690		3074.26669	0.33142	0.33262	0.33341	0.33445	0.33479	0.33576	0.33592	0.33685	0.33703	0.33786	0.33895	0.34047															1377.05547	1.61E-4	-3.5E-4	1.46E-4	1306.65908	-4.71E-4	4.76763E-4
							1923.83	-0.00223	-0.00254	3073.30236	14814	3073.30236	-56889		3073.30236	0.33071	0.33192	0.33272	0.33376	0.3341	0.33508	0.33523	0.33615	0.33635	0.33717	0.33828	0.3398															1376.09114	1.49E-4	-3.71E-4	1.35E-4	1305.69476	-4.45E-4	4.72487E-4
							1924.79	-0.0022	-0.00251	3072.33804	5897	3072.33804	-56636		3072.33804	0.33	0.33122	0.33201	0.33306	0.3334	0.33439	0.33454	0.33545	0.33565	0.33647	0.33761	0.33912															1375.12682	1.41E-4	-3.66E-4	1.31E-4	1304.73044	-4.45E-4	4.72657E-4
							1925.76	-0.00218	-0.00248	3071.37371	-2199	3071.37371	-63287		3071.37371	0.32927	0.33051	0.33127	0.33234	0.33268	0.33366	0.33384	0.33474	0.33492	0.33577	0.33692	0.33841															1374.16249	1.38E-4	-3.57E-4	1.3E-4	1303.76612	-4.57E-4	5.07541E-4
							1926.72	-0.00215	-0.00245	3070.40939	-5382	3070.40939	-72176		3070.40939	0.32854	0.32977	0.33052	0.3316	0.33196	0.33294	0.33313	0.33404	0.3342	0.33506	0.33622	0.3377															1373.19817	1.35E-4	-3.38E-4	1.36E-4	1302.8018	-4.35E-4	5.40469E-4
							1927.68	-0.00211	-0.00242	3069.44506	-3896	3069.44506	-81798		3069.44506	0.3278	0.32904	0.32981	0.33088	0.33126	0.33223	0.33243	0.33334	0.3335	0.33434	0.33552	0.337															1372.23384	1.38E-4	-3.15E-4	1.5E-4	1301.83749	-3.91E-4	5.54394E-4
							1928.65	-0.00208	-0.0024	3068.48074	-2712	3068.48074	-96663		3068.48074	0.32706	0.32832	0.3291	0.33016	0.33057	0.33152	0.33174	0.33264	0.33282	0.33364	0.33481	0.33631															1371.26952	1.46E-4	-3.18E-4	1.55E-4	1300.87317	-3.51E-4	5.65172E-4
							1929.61	-0.00204	-0.00237	3067.51642	-4815	3067.51641	-119038		3067.51642	0.3263	0.32757	0.32836	0.32942	0.32983	0.33079	0.331	0.33191	0.3321	0.33292	0.33408	0.3356															1370.3052	1.52E-4	-3.47E-4	1.47E-4	1299.90885	-3.24E-4	5.70788E-4
							1930.58	-0.00201	-0.00233	3066.55209	-8437	3066.55209	-143273		3066.55209	0.32554	0.3268	0.32759	0.32866	0.32907	0.33003	0.33024	0.33116	0.33136	0.33218	0.33333	0.33486															1369.34087	1.57E-4	-3.73E-4	1.44E-4	1298.94453	-3.27E-4	5.71672E-4
							1931.54	-0.00198	-0.00228	3065.58777	-10164	3065.58777	-159529		3065.58777	0.32477	0.32602	0.32681	0.32788	0.32829	0.32926	0.32946	0.33039	0.3306	0.33141	0.33258	0.33411															1368.37655	1.47E-4	-3.67E-4	1.5E-4	1297.98021	-3.44E-4	5.71438E-4
							1932.51	-0.00195	-0.00223	3064.62344	-8583	3064.62344	-165176		3064.62344	0.32397	0.32522	0.32602	0.3271	0.32751	0.32847	0.32868	0.32961	0.32983	0.33063	0.33181	0.33335															1367.41222	1.04E-4	-3.32E-4	1.56E-4	1297.01589	-3.45E-4	5.59979E-4
							1933.47	-0.00192	-0.00219	3063.65912	-4151	3063.65912	-165472		3063.65912	0.32317	0.32441	0.32521	0.32631	0.32671	0.32768	0.32788	0.3288	0.32904	0.32983	0.33104	0.33257															1366.4479	5.5E-5	-3.02E-4	1.5E-4	1296.05158	-3.38E-4	5.50618E-4
							1934.44	-0.00188	-0.00215	3062.69479	2729	3062.69479	-162020		3062.69479	0.32235	0.32359	0.3244	0.3255	0.32588	0.32687	0.32708	0.32799	0.32823	0.32902	0.33026	0.33176															1365.48357	3.7E-5	-3.14E-4	1.35E-4	1295.08726	-3.5E-4	5.67752E-4
							1935.4	-0.00184	-0.00212	3061.73047	10626	3061.73047	-154929		3061.73047	0.32149	0.32276	0.32356	0.32467	0.32504	0.32605	0.32626	0.32718	0.32742	0.3282	0.32945	0.33094															1364.51925	3.4E-5	-3.68E-4	1.28E-4	1294.12294	-3.81E-4	5.9578E-4
							1936.36	-0.00179	-0.00208	3060.76614	17021	3060.76614	-146601		3060.76614	0.32063	0.3219	0.32269	0.32381	0.3242	0.3252	0.32542	0.32635	0.32657	0.32737	0.32859	0.33012															1363.55492	2.7E-5	-4.3E-4	1.32E-4	1293.15862	-3.91E-4	6.11376E-4
							1937.33	-0.00176	-0.00203	3059.80182	20527	3059.80182	-134711		3059.80182	0.31976	0.32102	0.32181	0.32294	0.32335	0.32434	0.32456	0.3255	0.32572	0.32652	0.32773	0.32928															1362.5906	3E-5	-4.66E-4	1.38E-4	1292.1943	-3.77E-4	6.12205E-4
							1938.29	-0.00173	-0.00197	3058.83749	21774	3058.83749	-117733		3058.83749	0.31887	0.32012	0.32094	0.32206	0.32248	0.32346	0.32369	0.32463	0.32486	0.32567	0.32687	0.3284															1361.62627	4E-5	-4.63E-4	1.35E-4	1291.22998	-3.79E-4	6.07081E-4
							1939.26	-0.00168	-0.00191	3057.87317	22755	3057.87317	-101521		3057.87317	0.31796	0.31922	0.32005	0.32117	0.32158	0.32258	0.32281	0.32374	0.32397	0.32479	0.32599	0.32751															1360.66195	4.6E-5	-4.54E-4	1.32E-4	1290.26567	-3.96E-4	6.12128E-4
							1940.22	-0.00162	-0.00186	3056.90885	25452	3056.90884	-90412		3056.90885	0.31705	0.3183	0.31914	0.32027	0.32067	0.32167	0.32191	0.32283	0.32306	0.3239	0.3251	0.32662															1359.69763	4.4E-5	-4.66E-4	1.31E-4	1289.30135	-4.05E-4	6.21751E-4
							1941.19	-0.00157	-0.00182	3055.94452	29860	3055.94452	-81153		3055.94452	0.31613	0.31738	0.31822	0.31937	0.31976	0.32075	0.321	0.32193	0.32214	0.32301	0.32421	0.32574															1358.7333	4.4E-5	-4.76E-4	1.28E-4	1288.33703	-4.13E-4	6.22684E-4
							1942.15	-0.00152	-0.00178	3054.9802	33521	3054.9802	-70193		3054.9802	0.31519	0.31646	0.3173	0.31846	0.31885	0.31983	0.32009	0.32102	0.32124	0.32211	0.3233	0.32484															1357.76898	4.9E-5	-4.59E-4	1.34E-4	1287.37271	-4.33E-4	6.28722E-4
							1943.11	-0.00148	-0.00172	3054.01587	33984	3054.01587	-59664		3054.01587	0.31424	0.31552	0.31637	0.31754	0.31793	0.31892	0.31917	0.32011	0.32033	0.3212	0.32238	0.32393															1356.80465	4.5E-5	-4.25E-4	1.52E-4	1286.40839	-4.57E-4	6.42736E-4
							1944.08	-0.00144	-0.00167	3053.05155	31098	3053.05155	-53648		3053.05155	0.31328	0.31458	0.31543	0.31661	0.317	0.31799	0.31824	0.31919	0.31942	0.32026	0.32146	0.32299															1355.84033	2.5E-5	-4E-4	1.68E-4	1285.44407	-4.65E-4	6.46881E-4
							1945.04	-0.00139	-0.00161	3052.08722	27826	3052.08722	-51593		3052.08722	0.31233	0.31363	0.31449	0.31565	0.31606	0.31705	0.3173	0.31825	0.3185	0.31932	0.32054	0.32205															1354.876	1.4E-5	-3.83E-4	1.68E-4	1284.47976	-4.58E-4	6.45413E-4
							1946.01	-0.00132	-0.00154	3051.1229	28257	3051.1229	-50049		3051.1229	0.31137	0.31268	0.31355	0.31469	0.31511	0.31611	0.31635	0.31731	0.31757	0.31838	0.31959	0.32112															1353.91168	2E-5	-3.65E-4	1.52E-4	1283.51544	-4.57E-4	6.36422E-4
							1946.97	-0.00125	-0.00147	3050.15857	34013	3050.15857	-49978		3050.15857	0.3104	0.31172	0.31259	0.31373	0.31416	0.31516	0.3154	0.31637	0.31661	0.31744	0.31862	0.32018															1352.94735	2.7E-5	-3.5E-4	1.42E-4	1282.55112	-4.65E-4	6.06367E-4
							1947.94	-0.0012	-0.00141	3049.19425	42118	3049.19425	-51957		3049.19425	0.30942	0.31075	0.31162	0.31278	0.3132	0.31419	0.31444	0.31541	0.31563	0.31648	0.31766	0.31923															1351.98303	4.2E-5	-3.44E-4	1.5E-4	1281.5868	-4.61E-4	5.83848E-4
							1948.9	-0.00114	-0.00135	3048.22992	48836	3048.22992	-50219		3048.22992	0.30844	0.30976	0.31065	0.31181	0.31223	0.31321	0.31348	0.31445	0.31466	0.31553	0.3167	0.31827															1351.0187	6.8E-5	-3.49E-4	1.44E-4	1280.62248	-4.31E-4	5.75337E-4
							1949.86	-0.00109	-0.00129	3047.2656	54748	3047.2656	-44155		3047.2656	0.30746	0.30877	0.30967	0.31082	0.31126	0.31223	0.31251	0.31349	0.31369	0.31457	0.31574	0.3173															1350.05438	8.8E-5	-3.63E-4	1.21E-4	1279.65817	-4.1E-4	5.4685E-4
							1950.83	-0.00103	-0.00123	3046.30127	61471	3046.30127	-39131		3046.30127	0.30648	0.30779	0.30868	0.30983	0.31028	0.31126	0.31153	0.31252	0.31272	0.3136	0.31478	0.31635															1349.09006	8.5E-5	-3.78E-4	1.17E-4	1278.69385	-4.32E-4	5.18795E-4
							1951.79	-9.637E-4	-0.00115	3045.33695	67318	3045.33695	-33383		3045.33695	0.30549	0.3068	0.30768	0.30884	0.30928	0.31028	0.31053	0.31154	0.31175	0.31262	0.31381	0.3154															1348.12573	6.6E-5	-3.76E-4	1.32E-4	1277.72953	-4.75E-4	5.21159E-4
							1952.76	-8.85949E-4	-0.00107	3044.37263	70581	3044.37263	-22551		3044.37263	0.30451	0.3058	0.30669	0.30786	0.30828	0.30931	0.30954	0.31055	0.31078	0.31164	0.31283	0.31443															1347.16141	4.4E-5	-3.63E-4	1.27E-4	1276.76521	-4.94E-4	5.45778E-4
							1953.72	-8.26322E-4	-0.001	3043.4083	71859	3043.4083	-9758		3043.4083	0.30351	0.3048	0.3057	0.30687	0.30729	0.30834	0.30857	0.30957	0.3098	0.31066	0.31186	0.31344															1346.19708	2.6E-5	-3.69E-4	1.04E-4	1275.80089	-4.77E-4	5.76893E-4
							1954.69	-7.78211E-4	-9.36321E-4	3042.44398	71382	3042.44398	2267		3042.44398	0.3025	0.30382	0.3047	0.30587	0.3063	0.30734	0.30759	0.30858	0.30881	0.30967	0.31088	0.31245															1345.23276	1.5E-5	-3.93E-4	8.7E-5	1274.83657	-4.51E-4	5.88563E-4
							1955.65	-7.19034E-4	-8.53656E-4	3041.47965	68729	3041.47965	14076		3041.47965	0.30149	0.30283	0.3037	0.30488	0.30532	0.30634	0.30661	0.30758	0.30782	0.30868	0.30989	0.31146															1344.26843	6E-6	-4.13E-4	8.2E-5	1273.87226	-4.35E-4	5.70983E-4
							1956.61	-6.52974E-4	-7.75782E-4	3040.51533	65409	3040.51533	22535		3040.51533	0.30048	0.30182	0.30269	0.30388	0.30434	0.30534	0.30562	0.30659	0.30685	0.3077	0.3089	0.31048															1343.30411	-1.3E-5	-4.31E-4	8.9E-5	1272.90794	-4.33E-4	5.40674E-4
							1957.58	-5.89437E-4	-7.1614E-4	3039.551	63927	3039.551	25507		3039.551	0.29948	0.30082	0.3017	0.3029	0.30335	0.30435	0.30464	0.3056	0.30587	0.30672	0.30791	0.30949															1342.33978	-3.1E-5	-4.55E-4	1.09E-4	1271.94362	-4.5E-4	5.11804E-4
							1958.54	-5.18755E-4	-6.49614E-4	3038.58668	64295	3038.58668	26645		3038.58668	0.29848	0.29982	0.30072	0.30191	0.30235	0.30337	0.30366	0.30461	0.30488	0.30573	0.30693	0.3085															1341.37546	-3E-5	-4.63E-4	1.18E-4	1270.9793	-4.74E-4	4.92136E-4
							1959.51	-4.41183E-4	-5.69894E-4	3037.62235	64319	3037.62235	29755		3037.62235	0.29749	0.29883	0.29974	0.30092	0.30136	0.30238	0.30267	0.30362	0.30387	0.30474	0.30596	0.30752															1340.41113	-2.1E-5	-4.43E-4	1.14E-4	1270.01498	-4.88E-4	4.84843E-4
							1960.47	-3.71615E-4	-4.98588E-4	3036.65803	63039	3036.65803	33051		3036.65803	0.29648	0.29783	0.29873	0.29992	0.30036	0.30139	0.30168	0.30263	0.30287	0.30374	0.30498	0.30654															1339.44681	-1E-5	-4.13E-4	1.24E-4	1269.05066	-5.05E-4	4.85967E-4
							1961.44	-3.07779E-4	-4.29805E-4	3035.6937	61723	3035.6937	30525		3035.6937	0.29548	0.29683	0.29772	0.29894	0.29937	0.30041	0.3007	0.30165	0.30189	0.30276	0.30399	0.30556															1338.48249	1.1E-5	-3.92E-4	1.44E-4	1268.08635	-5.42E-4	4.71356E-4
							1962.4	-2.31669E-4	-3.4632E-4	3034.72938	61385	3034.72938	19935		3034.72938	0.29448	0.29583	0.29672	0.29796	0.29837	0.29943	0.29972	0.30067	0.30091	0.30178	0.303	0.30458															1337.51816	2.5E-5	-4.06E-4	1.49E-4	1267.12203	-5.79E-4	4.17357E-4
							1963.36	-1.48974E-4	-2.59766E-4	3033.76506	61170	3033.76506	4096		3033.76506	0.29348	0.29483	0.29573	0.29698	0.29738	0.29843	0.29872	0.29968	0.29993	0.3008	0.30201	0.30361															1336.55384	2.2E-5	-4.48E-4	1.43E-4	1266.15771	-5.85E-4	3.50124E-4
							1964.33	-7.96179E-4	-1.85614E-4	3032.80073	60406	3032.80073	-15223		3032.80073	0.29248	0.29383	0.29473	0.29599	0.29638	0.29743	0.29773	0.29869	0.29896	0.29981	0.30103	0.30263															1335.58951	7E-6	-4.77E-4	1.4E-4	1265.19339	-5.69E-4	2.99615E-4
							1965.29	-1.39782E-4	-1.16471E-4	3031.83641	59612	3031.83641	-37825		3031.83641	0.29149	0.29284	0.29374	0.29498	0.2954	0.29644	0.29673	0.2977	0.29797	0.29883	0.30004	0.30165															1334.62519	-2E-6	-4.94E-4	1.35E-4	1264.22907	-5.67E-4	2.46003E-4
							1966.26	6.18719E-4	-4.07944E-4	3030.87208	58275	3030.87208	-61083		3030.87208	0.29048	0.29183	0.29275	0.29396	0.29442	0.29546	0.29573	0.29672	0.29697	0.29784	0.29905	0.30066															1333.66086	4E-6	-5E-4	1.23E-4	1263.26475	-5.9E-4	2.14223E-4
							1967.22	1.41335E-4	3.96332E-4	3029.90776	54933	3029.90776	-81007		3029.90776	0.28946	0.29082	0.29176	0.29295	0.29343	0.29447	0.29473	0.29572	0.29597	0.29685	0.29805	0.29966															1332.69654	1.3E-5	-4.73E-4	1.26E-4	1262.30044	-6.15E-4	2.61337E-4
							1968.19	2.22935E-4	1.24011E-4	3028.94343	50505	3028.94343	-93377		3028.94343	0.28844	0.2898	0.29077	0.29195	0.29243	0.29347	0.29373	0.29471	0.29496	0.29584	0.29705	0.29866															1331.73221	1E-5	-4.48E-4	1.45E-4	1261.33612	-6.02E-4	3.42043E-4
							1969.15	3.04733E-4	2.14311E-4	3027.97911	48174	3027.97911	-92510		3027.97911	0.28742	0.28879	0.28976	0.29094	0.29141	0.29246	0.29272	0.2937	0.29395	0.29483	0.29602	0.29765															1330.76789	-1.2E-5	-4.78E-4	1.5E-4	1260.3718	-5.64E-4	3.85884E-4
							1970.12	3.77478E-4	3.06158E-4	3027.01478	49882	3027.01478	-75070		3027.01478	0.28639	0.28777	0.28872	0.28992	0.29037	0.29143	0.29168	0.29268	0.29293	0.29381	0.29499	0.29662															1329.80356	-3.6E-5	-5.34E-4	1.4E-4	1259.40748	-5.51E-4	4.04164E-4
							1971.08	4.48965E-4	3.96651E-4	3026.05046	55679	3026.05046	-44527		3026.05046	0.28535	0.28673	0.28767	0.28888	0.28933	0.29038	0.29064	0.29165	0.2919	0.29278	0.29396	0.29557															1328.83924	-3.8E-5	-5.61E-4	1.27E-4	1258.44316	-5.65E-4	4.10672E-4
							1972.04	5.33112E-4	4.85193E-4	3025.08613	65070	3025.08613	-10620		3025.08613	0.28429	0.28566	0.28661	0.28783	0.28827	0.28931	0.28959	0.29061	0.29085	0.29171	0.29292	0.29452															1327.87491	-3.2E-5	-5.56E-4	1.13E-4	1257.47885	-5.89E-4	3.95308E-4
							1973.01	6.22252E-4	5.68154E-4	3024.12181	75422	3024.12181	16888		3024.12181	0.28322	0.28459	0.28554	0.28676	0.28721	0.28825	0.28854	0.28955	0.28979	0.29064	0.29187	0.29348															1326.91059	-4.9E-5	-5.54E-4	1.13E-4	1256.51453	-6.19E-4	3.96079E-4
							1973.97	7.09207E-4	6.48098E-4	3023.15749	82611	3023.15749	36920		3023.15749	0.28216	0.28352	0.28446	0.28569	0.28614	0.28719	0.28749	0.28849	0.28874	0.28958	0.29081	0.29244															1325.94627	-8.1E-5	-5.8E-4	1.29E-4	1255.55021	-6.25E-4	4.32062E-4
							1974.94	7.99784E-4	7.36951E-4	3022.19316	86339	3022.19316	54788		3022.19316	0.2811	0.28246	0.28339	0.28461	0.28507	0.28613	0.28644	0.28742	0.28769	0.28853	0.28975	0.29139															1324.98194	-9.1E-5	-6.09E-4	1.41E-4	1254.58589	-6.19E-4	4.34397E-4
							1975.9	8.8846E-4	8.38946E-4	3021.22884	89345	3021.22884	70713		3021.22884	0.28003	0.28141	0.28234	0.28354	0.28401	0.28507	0.28538	0.28637	0.28664	0.28749	0.2887	0.29033															1324.01762	-6.7E-5	-6.05E-4	1.41E-4	1253.62157	-6.48E-4	3.82787E-4
							1976.87	9.70876E-4	9.42131E-4	3020.26451	92937	3020.26451	81787		3020.26451	0.27898	0.28037	0.28131	0.2825	0.28296	0.28403	0.28434	0.28533	0.28559	0.28646	0.28766	0.28929															1323.05329	-3.8E-5	-5.74E-4	1.32E-4	1252.65725	-7.02E-4	3.36079E-4
							1977.83	0.00106	0.00104	3019.30019	97463	3019.30019	90241		3019.30019	0.27793	0.27933	0.28029	0.28148	0.28194	0.28299	0.28331	0.28431	0.28456	0.28545	0.28662	0.28827															1322.08897	-3.5E-5	-5.38E-4	1.31E-4	1251.69294	-7.43E-4	3.19423E-4
							1978.79	0.00115	0.00114	3018.33586	103112	3018.33586	98879		3018.33586	0.27688	0.27828	0.27926	0.28046	0.28092	0.28196	0.28227	0.28329	0.28354	0.28442	0.28558	0.28724															1321.12464	-4.6E-5	-5.18E-4	1.52E-4	1250.72862	-7.4E-4	3.07537E-4
							1979.76	0.00125	0.00125	3017.37154	108573	3017.37154	109018		3017.37154	0.27584	0.27724	0.27823	0.27943	0.2799	0.28095	0.28124	0.28227	0.28252	0.28337	0.28456	0.28621															1320.16032	-5.1E-5	-5.27E-4	1.76E-4	1249.7643	-7.03E-4	2.72059E-4
							1980.72	0.00133	0.00134	3016.40721	111701	3016.40721	121538		3016.40721	0.27482	0.27623	0.27722	0.27841	0.27888	0.27996	0.28022	0.28125	0.2815	0.28235	0.28355	0.28519															1319.19599	-6.5E-5	-5.46E-4	1.78E-4	1248.79998	-6.94E-4	2.19729E-4
							1981.69	0.00142	0.00143	3015.44289	111950	3015.44289	133531		3015.44289	0.27381	0.27522	0.27621	0.27741	0.27788	0.27896	0.27921	0.28024	0.2805	0.28135	0.28256	0.28419															1318.23167	-8E-5	-5.71E-4	1.76E-4	1247.83566	-7.31E-4	1.79722E-4
							1982.65	0.00152	0.00152	3014.47856	110834	3014.47856	140350		3014.47856	0.27282	0.27421	0.27521	0.27642	0.27689	0.27796	0.27822	0.27924	0.2795	0.28035	0.28157	0.28321															1317.26734	-6.9E-5	-6.18E-4	1.83E-4	1246.87134	-7.43E-4	1.74277E-4
							1983.62	0.00161	0.00162	3013.51424	109738	3013.51424	138237		3013.51424	0.27184	0.27323	0.27422	0.27544	0.27591	0.27696	0.27724	0.27824	0.27852	0.27938	0.28059	0.28224															1316.30302	-5.1E-5	-6.54E-4	1.76E-4	1245.90703	-7.18E-4	1.97004E-4
							1984.58	0.00171	0.00173	3012.54992	108668	3012.54991	129024		3012.54992	0.27086	0.27226	0.27324	0.27446	0.27492	0.27597	0.27627	0.27725	0.27755	0.27841	0.27962	0.28126															1315.3387	-3.1E-5	-6.41E-4	1.68E-4	1244.94271	-7.02E-4	2.16843E-4
							1985.54	0.00181	0.00184	3011.58559	107518	3011.58559	122978		3011.58559	0.26988	0.27128	0.27226	0.27348	0.27394	0.27499	0.2753	0.27628	0.27657	0.27745	0.27865	0.28029															1314.37437	9E-6	-5.99E-4	1.73E-4	1243.97839	-6.99E-4	2.22592E-4
							1986.51	0.00191	0.00195	3010.62127	106331	3010.62127	126587		3010.62127	0.26891	0.27031	0.27129	0.27251	0.27297	0.27402	0.27434	0.27533	0.2756	0.27648	0.27771	0.27933															1313.41005	3.8E-5	-5.55E-4	1.69E-4	1243.01407	-7.11E-4	2.19893E-4
							1987.47	0.002	0.00206	3009.65694	105469	3009.65694	135630		3009.65694	0.26795	0.26935	0.27033	0.27154	0.27202	0.27306	0.2734	0.27439	0.27464	0.27552	0.27677	0.27838															1312.44572	3.1E-5	-5.08E-4	1.6E-4	1242.04975	-7.28E-4	2.17938E-4
							1988.44	0.00211	0.00217	3008.69262	106527	3008.69262	146425		3008.69262	0.26701	0.2684	0.2694	0.27059	0.27108	0.2721	0.27247	0.27345	0.27371	0.27457	0.27584	0.27743															1311.4814	1.5E-5	-4.67E-4	1.53E-4	1241.08543	-7.29E-4	2.22988E-4
							1989.4	0.00222	0.00228	3007.72829	110318	3007.72829	159445		3007.72829	0.26608	0.26746	0.26847	0.26966	0.27016	0.27118	0.27154	0.27251	0.27279	0.27365	0.27492	0.2765															1310.51707	1E-5	-4.39E-4	1.51E-4	1240.12112	-7.28E-4	2.34276E-4
							1990.37	0.00232	0.00239	3006.76397	115984	3006.76397	174196		3006.76397	0.26517	0.26652	0.26756	0.26874	0.26924	0.27028	0.27062	0.27159	0.27188	0.27274	0.27401	0.27558															1309.55275	1.1E-5	-4.25E-4	1.53E-4	1239.1568	-7.26E-4	2.58204E-4
							1991.33	0.00243	0.0025	3005.79964	122450	3005.79964	192664		3005.79964	0.26427	0.26561	0.26667	0.26782	0.26834	0.26938	0.26972	0.27068	0.27098	0.27184	0.27312	0.27469															1308.58842	1.5E-5	-4.16E-4	1.45E-4	1238.19248	-7.13E-4	2.97985E-4
							1992.29	0.00254	0.0026	3004.83532	128879	3004.83532	216283		3004.83532	0.26338	0.26472	0.26578	0.26691	0.26745	0.26849	0.26884	0.26978	0.2701	0.27094	0.27224	0.27382															1307.6241	1.5E-5	-4.13E-4	1.23E-4	1237.22816	-7E-4	3.49334E-4
							1993.26	0.00264	0.00271	3003.87099	135345	3003.87099	240987		3003.87099	0.2625	0.26385	0.26489	0.26603	0.26658	0.26761	0.26798	0.26891	0.26923	0.27007	0.27136	0.27294															1306.65977	1E-5	-4.19E-4	1.2E-4	1236.26384	-6.82E-4	3.91146E-4
							1994.22	0.00275	0.00282	3002.90667	141773	3002.90667	263805		3002.90667	0.26162	0.26301	0.26402	0.26519	0.26573	0.26675	0.26712	0.26806	0.26837	0.26921	0.27051	0.27208															1305.69545	2.4E-5	-4.3E-4	1.38E-4	1235.29952	-6.44E-4	3.99212E-4
							1995.19	0.00287	0.00294	3001.94235	146506	3001.94234	285908		3001.94235	0.26078	0.26217	0.26318	0.26436	0.26491	0.26591	0.26628	0.26722	0.26754	0.26837	0.26968	0.27125															1304.73113	5E-5	-4.47E-4	1.49E-4	1234.33521	-6.01E-4	3.97863E-4
							1996.15	0.00298	0.00307	3000.97802	148990	3000.97802	309527		3000.97802	0.25997	0.26135	0.26238	0.26355	0.2641	0.26509	0.26546	0.26641	0.26673	0.26755	0.26888	0.27043															1303.7668	6E-5	-4.57E-4	1.58E-4	1233.37089	-5.78E-4	4.17578E-4
							1997.12	0.00309	0.00318	3000.0137	150302	3000.0137	334730		3000.0137	0.2592	0.26056	0.2616	0.26276	0.26332	0.26429	0.26468	0.26563	0.26595	0.26676	0.26811	0.26964															1302.80248	4.6E-5	-4.63E-4	1.74E-4	1232.40657	-5.72E-4	4.45123E-4
							1998.08	0.00321	0.0033	2999.04937	150782	2999.04937	359104		2999.04937	0.25844	0.2598	0.26083	0.26199	0.26257	0.26353	0.26392	0.26487	0.2652	0.266	0.26737	0.26889															1301.83815	2.7E-5	-4.74E-4	1.8E-4	1231.44225	-5.55E-4	4.78168E-4
							1999.04	0.00333	0.00343	2998.08505	150458	2998.08505	379907		2998.08505	0.25772	0.25908	0.2601	0.26126	0.26183	0.26279	0.26319	0.26413	0.26448	0.26528	0.26665	0.26817															1300.87383	2.3E-5	-4.79E-4	1.74E-4	1230.47793	-5.39E-4	5.30327E-4
							2000.01	0.00344	0.00355	2997.12072	149624	2997.12072	396508		2997.12072	0.25703	0.25838	0.25942	0.26057	0.26112	0.26209	0.26251	0.26344	0.26379	0.26458	0.26596	0.26749															1299.9095	4.6E-5	-4.94E-4	1.69E-4	1229.51362	-5.66E-4	5.80098E-4
							2000.97	0.00356	0.00368	2996.1564	148323	2996.1564	411105		2996.1564	0.25638	0.25771	0.25878	0.25991	0.26045	0.26143	0.26186	0.26279	0.26313	0.26392	0.2653	0.26684															1298.94518	7.6E-5	-5.11E-4	1.6E-4	1228.5493	-6.3E-4	5.96327E-4
							2001.94	0.00368	0.00381	2995.19207	146488	2995.19207	423521		2995.19207	0.25576	0.25708	0.25815	0.25928	0.25983	0.2608	0.26125	0.26216	0.2625	0.2633	0.26469	0.26621															1297.98085	7.8E-5	-4.98E-4	1.4E-4	1227.58498	-6.93E-4	5.77672E-4
							2002.9	0.00378	0.00393	2994.22775	145153	2994.22775	429868		2994.22775	0.25516	0.25648	0.25755	0.25868	0.25925	0.26021	0.26066	0.26155	0.26191	0.26272	0.26411	0.26561															1297.01653	6.8E-5	-4.64E-4	1.21E-4	1226.62066	-7.41E-4	5.4312E-4
							2003.87	0.0039	0.00405	2993.26342	146388	2993.26342	427173		2993.26342	0.25462	0.25593	0.25699	0.25813	0.25871	0.25967	0.26012	0.26099	0.26137	0.26217	0.26356	0.26507															1296.0522	8.1E-5	-4.25E-4	1.32E-4	1225.65634	-7.6E-4	5.15062E-4
							2004.83	0.00402	0.00417	2992.2991	148292	2992.2991	416699		2992.2991	0.25411	0.25542	0.25648	0.25763	0.2582	0.25917	0.25961	0.26048	0.26087	0.26165	0.26306	0.26457															1295.08788	1.09E-4	-3.81E-4	1.68E-4	1224.69202	-7.2E-4	5.16482E-4
							2005.8	0.00414	0.0043	2991.33478	146462	2991.33477	404689		2991.33478	0.25363	0.25494	0.25602	0.25716	0.25773	0.2587	0.25912	0.26	0.26039	0.26117	0.26259	0.2641															1294.12356	1.24E-4	-3.44E-4	1.94E-4	1223.72771	-6.54E-4	5.52431E-4
							2006.76	0.00425	0.00442	2990.37045	141124	2990.37045	396961		2990.37045	0.25319	0.25451	0.25559	0.25672	0.2573	0.25827	0.25868	0.25956	0.25996	0.26074	0.26218	0.26368															1293.15923	1.21E-4	-3.35E-4	1.79E-4	1222.76339	-6.22E-4	5.97892E-4
							2007.72	0.00439	0.00456	2989.40613	135117	2989.40613	393276		2989.40613	0.25279	0.2541	0.25519	0.25631	0.2569	0.25787	0.25829	0.25917	0.25956	0.26034	0.26181	0.2633															1292.19491	1.23E-4	-3.46E-4	1.39E-4	1221.79907	-6.18E-4	6.35086E-4
							2008.69	0.00453	0.00468	2988.4418	129727	2988.4418	391041		2988.4418	0.25243	0.25372	0.2548	0.25593	0.25653	0.25748	0.25793	0.2588	0.25919	0.25996	0.26147	0.26295															1291.23058	1.46E-4	-3.55E-4	1.25E-4	1220.83475	-6.02E-4	6.65324E-4
							2009.65	0.00465	0.00481	2987.47748	124848	2987.47748	390371		2987.47748	0.25211	0.25338	0.25445	0.2556	0.25619	0.25713	0.25761	0.25847	0.25886	0.25963	0.26114	0.26264															1290.26626	1.64E-4	-3.66E-4	1.37E-4	1219.87043	-5.6E-4	6.94485E-4
							2010.62	0.00476	0.00493	2986.51315	120180	2986.51315	390969		2986.51315	0.25182	0.25309	0.25415	0.25532	0.25591	0.25684	0.25733	0.25818	0.25858	0.25935	0.26087	0.26235															1289.30193	1.57E-4	-3.83E-4	1.46E-4	1218.90611	-4.88E-4	7.30453E-4
							2011.58	0.00488	0.00506	2985.54883	115856	2985.54883	388258		2985.54883	0.25157	0.25284	0.25391	0.25506	0.25566	0.2566	0.25707	0.25793	0.25835	0.2591	0.26063	0.2621															1288.33761	1.4E-4	-3.86E-4	1.48E-4	1217.9418	-4.23E-4	7.72884E-4
							2012.55	0.005	0.00518	2984.5845	110925	2984.5845	377427		2984.5845	0.25134	0.25261	0.2537	0.25483	0.25545	0.25639	0.25685	0.25772	0.25815	0.25889	0.26044	0.2619															1287.37328	1.35E-4	-3.81E-4	1.51E-4	1216.97748	-4.28E-4	8.05275E-4
							2013.51	0.00513	0.0053	2983.62018	103780	2983.62018	356245		2983.62018	0.25116	0.25242	0.25354	0.25465	0.25528	0.25621	0.25667	0.25756	0.25798	0.25872	0.26029	0.26174															1286.40896	1.31E-4	-4.06E-4	1.46E-4	1216.01316	-4.54E-4	8.09208E-4
							2014.47	0.00528	0.00544	2982.65585	93647	2982.65585	324650		2982.65585	0.25102	0.25228	0.25341	0.25452	0.25516	0.25607	0.25654	0.25743	0.25785	0.2586	0.26018	0.26161															1285.44463	1.11E-4	-4.44E-4	1.39E-4	1215.04884	-4.33E-4	7.98865E-4
							2015.44	0.0054	0.00558	2981.69153	80208	2981.69153	286412		2981.69153	0.25092	0.25218	0.2533	0.25441	0.25507	0.25596	0.25644	0.25732	0.25775	0.2585	0.26009	0.26151															1284.48031	8.7E-5	-4.3E-4	1.5E-4	1214.08452	-4E-4	7.9994E-4
							2016.4	0.00553	0.00571	2980.72721	64586	2980.7272	250031		2980.72721	0.25084	0.2521	0.25322	0.25432	0.255	0.25589	0.25637	0.25725	0.25768	0.25843	0.26003	0.26145															1283.51599	6.2E-5	-3.68E-4	1.69E-4	1213.1202	-3.86E-4	8.09272E-4
							2017.37	0.00566	0.00585	2979.76288	48565	2979.76288	224733		2979.76288	0.2508	0.25206	0.25319	0.25427	0.25495	0.25586	0.25634	0.2572	0.25765	0.25838	0.26	0.26142															1282.55166	3.2E-5	-3.2E-4	1.8E-4	1212.15589	-4.03E-4	8.06961E-4
							2018.33	0.00579	0.00598	2978.79856	31352	2978.79856	213586		2978.79856	0.25078	0.25203	0.25317	0.25425	0.25491	0.25584	0.25632	0.25718	0.25763	0.25836	0.25999	0.26142															1281.58734	3.8E-5	-3.18E-4	1.79E-4	1211.19157	-4.63E-4	7.805E-4
							2019.3	0.00591	0.00611	2977.83423	10525	2977.83423	210581		2977.83423	0.25078	0.25202	0.25317	0.25425	0.25491	0.25583	0.25633	0.25718	0.25763	0.25836	0.26001	0.26143															1280.62301	9E-5	-3.49E-4	1.65E-4	1210.22725	-5.41E-4	7.51786E-4
							2020.26	0.00604	0.00625	2976.86991	-14682	2976.86991	205667		2976.86991	0.25078	0.25203	0.25319	0.25426	0.25494	0.25585	0.25636	0.25721	0.25766	0.25839	0.26005	0.26148															1279.65869	1.22E-4	-3.7E-4	1.61E-4	1209.26293	-6.05E-4	7.51733E-4
							2021.22	0.00617	0.0064	2975.90558	-42473	2975.90558	190305		2975.90558	0.2508	0.25206	0.25323	0.2543	0.25498	0.25589	0.2564	0.25725	0.2577	0.25844	0.26012	0.26155															1278.69436	1.19E-4	-3.61E-4	1.76E-4	1208.29861	-6.15E-4	7.66342E-4
							2022.19	0.0063	0.00653	2974.94126	-70225	2974.94126	155588		2974.94126	0.25085	0.25211	0.25327	0.25436	0.25504	0.25594	0.25646	0.25729	0.25777	0.2585	0.26021	0.26161															1277.73004	1.23E-4	-3.47E-4	1.8E-4	1207.3343	-5.81E-4	7.57298E-4
							2023.15	0.00644	0.00666	2973.97693	-96184	2973.97693	92878		2973.97693	0.25093	0.25218	0.25334	0.25443	0.25512	0.25601	0.25654	0.25736	0.25785	0.25858	0.26031	0.26169															1276.76571	1.39E-4	-3.39E-4	1.71E-4	1206.36998	-5.7E-4	7.30312E-4
							2024.12	0.00657	0.0068	2973.01261	-119408	2973.01261	3232		2973.01261	0.25104	0.25226	0.25344	0.25452	0.25522	0.2561	0.25664	0.25747	0.25795	0.25868	0.26041	0.26179															1275.80139	1.55E-4	-3.31E-4	1.74E-4	1205.40566	-5.78E-4	7.35526E-4
							2025.08	0.0067	0.00693	2972.04828	-139896	2972.04828	-103686		2972.04828	0.25116	0.25236	0.25355	0.25462	0.25534	0.25622	0.25676	0.25759	0.25806	0.25878	0.26053	0.2619															1274.83706	1.58E-4	-3.29E-4	1.83E-4	1204.44134	-5.59E-4	7.73105E-4
							2026.05	0.00683	0.00706	2971.08396	-158404	2971.08396	-219301		2971.08396	0.25128	0.25245	0.25366	0.25473	0.25546	0.25633	0.25689	0.25771	0.25819	0.25889	0.26067	0.26203															1273.87274	1.36E-4	-3.51E-4	1.81E-4	1203.47702	-5.18E-4	7.87033E-4
							2027.01	0.00698	0.0072	2970.11963	-176019	2970.11963	-335517		2970.11963	0.25137	0.25254	0.25376	0.25483	0.25556	0.25643	0.257	0.25782	0.25831	0.259	0.2608	0.26217															1272.90842	1.05E-4	-3.87E-4	1.78E-4	1202.5127	-4.7E-4	7.62888E-4
							2027.97	0.00713	0.00733	2969.15531	-193188	2969.15531	-446371		2969.15531	0.25142	0.25261	0.25384	0.25491	0.25563	0.25651	0.25708	0.25791	0.2584	0.25907	0.2609	0.26228															1271.94409	8.4E-5	-4.07E-4	1.76E-4	1201.54839	-4.29E-4	7.34084E-4
							2028.94	0.00727	0.00747	2968.19099	-208266	2968.19099	-553255		2968.19099	0.25144	0.25267	0.25387	0.25495	0.25567	0.25656	0.25712	0.25796	0.25844	0.25912	0.26095	0.26234															1270.97977	6.1E-5	-4.15E-4	1.65E-4	1200.58407	-4.27E-4	7.28712E-4
							2029.9	0.00742	0.00761	2967.22666	-219293	2967.22666	-658313		2967.22666	0.25143	0.25268	0.25387	0.25495	0.25567	0.25657	0.25713	0.25797	0.25845	0.25915	0.26097	0.26237															1270.01544	4.7E-5	-4.26E-4	1.6E-4	1199.61975	-4.48E-4	7.43471E-4
							2030.87	0.00755	0.00776	2966.26234	-225050	2966.26234	-760753		2966.26234	0.25137	0.25263	0.25383	0.25491	0.25564	0.25654	0.25709	0.25795	0.25843	0.25914	0.26094	0.26236															1269.05112	5.5E-5	-4.31E-4	1.73E-4
							2031.83	0.00768	0.00789	2965.29801	-224270	2965.29801	-861434		2965.29801	0.25126	0.25253	0.25373	0.25483	0.25556	0.25646	0.25699	0.25787	0.25836	0.25907	0.26086	0.2623															1268.08679	6E-5	-4.15E-4	1.88E-4
							2032.8	0.00781	0.00802	2964.33369	-216807	2964.33369	-958909		2964.33369	0.25109	0.25235	0.25357	0.25468	0.2554	0.25631	0.25684	0.25772	0.25823	0.25892	0.26072	0.26216															1267.12247	6.2E-5	-3.88E-4	1.99E-4
							2033.76	0.00796	0.00815	2963.36936	-202930	2963.36936	-1045378		2963.36936	0.25084	0.25211	0.25333	0.25444	0.25516	0.25608	0.25661	0.25748	0.25799	0.25869	0.26048	0.26193															1266.15814	8.4E-5	-3.7E-4	2.14E-4
							2034.72	0.00808	0.00827	2962.40504	-181258	2962.40504	-1111072		2962.40504	0.25048	0.25176	0.25299	0.2541	0.25481	0.25576	0.25629	0.25716	0.25764	0.25837	0.26014	0.2616															1265.19382	1.12E-4	-3.66E-4	2.25E-4
							2035.69	0.00821	0.0084	2961.44071	-149920	2961.44071	-1146151		2961.44071	0.25003	0.25132	0.25254	0.25366	0.25436	0.25532	0.25586	0.25673	0.2572	0.25794	0.25971	0.26118															1264.22949	1.23E-4	-3.59E-4	2.16E-4
							2036.65	0.00835	0.00855	2960.47639	-109335	2960.47639	-1139270		2960.47639	0.24947	0.25077	0.25199	0.25311	0.25382	0.25477	0.25531	0.2562	0.25668	0.2574	0.25919	0.26065															1263.26517	1.12E-4	-3.21E-4	1.95E-4
							2037.62	0.0085	0.00869	2959.51206	-62185	2959.51206	-1080211		2959.51206	0.24881	0.25011	0.25134	0.25244	0.25318	0.2541	0.25467	0.25554	0.25605	0.25676	0.25857	0.26001															1262.30085	9.8E-5	-2.63E-4	1.83E-4
							2038.58	0.00864	0.00882	2958.54774	-10812	2958.54774	-965767		2958.54774	0.24806	0.24935	0.2506	0.25168	0.25244	0.25335	0.25393	0.25479	0.25532	0.25602	0.25785	0.25928															1261.33652	1.05E-4	-2.32E-4	1.82E-4
							2039.55	0.00878	0.00896	2957.58342	42266	2957.58342	-801747		2957.58342	0.24724	0.24852	0.24978	0.25086	0.25162	0.25254	0.2531	0.25397	0.2545	0.2552	0.25705	0.25846															1260.3722	1.18E-4	-2.56E-4	1.85E-4
							2040.51	0.00892	0.0091	2956.61909	92966	2956.61909	-596170		2956.61909	0.24633	0.24761	0.24889	0.24996	0.25071	0.25166	0.2522	0.25306	0.2536	0.2543	0.25616	0.25758															1259.40787	1.11E-4	-3.09E-4	1.94E-4
							2041.48	0.00905	0.00922	2955.65477	138571	2955.65477	-356145		2955.65477	0.24536	0.24663	0.24792	0.24899	0.24976	0.25069	0.25125	0.2521	0.25264	0.25333	0.25521	0.25665															1258.44355	1.08E-4	-3.37E-4	2.03E-4
							2042.44	0.00918	0.00935	2954.69044	178929	2954.69044	-97742		2954.69044	0.24435	0.24562	0.24692	0.248	0.24877	0.24967	0.25026	0.25112	0.25164	0.25234	0.25424	0.25568															1257.47922	1.2E-4	-3.33E-4	2.05E-4
							2043.4	0.00931	0.00949	2953.72612	213444	2953.72612	152712		2953.72612	0.24333	0.24461	0.24589	0.247	0.24777	0.24865	0.24926	0.25013	0.25065	0.25135	0.25327	0.25469															1256.5149	1.31E-4	-3.25E-4	2.01E-4
							2044.37	0.00945	0.00963	2952.76179	240540	2952.76179	374532		2952.76179	0.24232	0.24362	0.24488	0.24601	0.24679	0.24766	0.24827	0.24914	0.24967	0.25038	0.25231	0.25371															1255.55057	1.4E-4	-3.33E-4	1.96E-4
							2045.33	0.00959	0.00976	2951.79747	259017	2951.79747	555890		2951.79747	0.24136	0.24266	0.24394	0.24506	0.24585	0.24671	0.24734	0.2482	0.24873	0.24945	0.2514	0.25279															1254.58625	1.51E-4	-3.47E-4	1.93E-4
							2046.3	0.00973	0.00989	2950.83314	268952	2950.83314	685405		2950.83314	0.24047	0.24176	0.24306	0.24416	0.24496	0.24583	0.24646	0.24732	0.24785	0.24856	0.25052	0.25191															1253.62192	1.59E-4	-3.34E-4	1.93E-4
							2047.26	0.00986	0.01003	2949.86882	270790	2949.86882	757068		2949.86882	0.23964	0.24092	0.24223	0.24332	0.24413	0.24501	0.24564	0.24649	0.24702	0.24773	0.24968	0.25108															1252.6576	1.71E-4	-2.98E-4	2E-4
							2048.23	0.00999	0.01016	2948.90449	264054	2948.90449	776637		2948.90449	0.23886	0.24012	0.24144	0.24254	0.24334	0.24422	0.24485	0.24571	0.24625	0.24695	0.2489	0.25029															1251.69328	1.87E-4	-2.58E-4	2.13E-4
							2049.19	0.01012	0.01029	2947.94017	248091	2947.94017	755316		2947.94017	0.23811	0.23936	0.24069	0.2418	0.2426	0.24348	0.24409	0.24497	0.24553	0.24621	0.24818	0.24956															1250.72895	1.97E-4	-2.2E-4	2.19E-4
							2050.15	0.01025	0.01042	2946.97585	223560	2946.97585	701670		2946.97585	0.23742	0.23865	0.24001	0.24109	0.2419	0.24279	0.2434	0.24428	0.24485	0.24552	0.24752	0.24888															1249.76463	1.93E-4	-2.11E-4	2.02E-4
							2051.12	0.01037	0.01054	2946.01152	192693	2946.01152	620332		2946.01152	0.23677	0.238	0.23937	0.24044	0.24125	0.24215	0.24276	0.24364	0.24421	0.24489	0.2469	0.24826															1248.8003	1.8E-4	-2.16E-4	1.77E-4
							2052.08	0.0105	0.01065	2945.0472	157283	2945.0472	515508		2945.0472	0.23617	0.23741	0.23878	0.23984	0.24065	0.24155	0.24217	0.24306	0.24362	0.24432	0.24632	0.24769															1247.83598	1.87E-4	-2.06E-4	1.75E-4
							2053.05	0.01064	0.01078	2944.08287	117562	2944.08287	391966		2944.08287	0.23562	0.23686	0.23823	0.2393	0.2401	0.241	0.24163	0.24252	0.24309	0.24378	0.24579	0.24717															1246.87165	2.3E-4	-1.83E-4	1.85E-4
							2054.01	0.01078	0.01091	2943.11855	75540	2943.11855	251599		2943.11855	0.23511	0.23635	0.23772	0.23878	0.2396	0.24049	0.24114	0.242	0.24258	0.24328	0.24529	0.24667															1245.90733	2.69E-4	-1.5E-4	1.82E-4
							2054.98	0.01091	0.01102	2942.15422	35186	2942.15422	95410		2942.15422	0.23462	0.23586	0.23723	0.23829	0.23911	0.24	0.24066	0.24151	0.2421	0.24278	0.24481	0.2462															1244.943	2.65E-4	-1.18E-4	1.68E-4
							2055.94	0.01102	0.01113	2941.1899	-1117	2941.1899	-67436		2941.1899	0.23415	0.23538	0.23675	0.23781	0.23864	0.23952	0.24019	0.24104	0.24163	0.24229	0.24436	0.24574															1243.97868	2.26E-4	-8.7E-5	1.65E-4
							2056.9	0.01113	0.01124	2940.22557	-32216	2940.22557	-222933		2940.22557	0.23366	0.23488	0.23625	0.23732	0.23817	0.23903	0.2397	0.24056	0.24114	0.24181	0.2439	0.24526															1243.01435	1.92E-4	-6.5E-5	1.69E-4
							2057.87	0.01125	0.01136	2939.26125	-57939	2939.26125	-362074		2939.26125	0.23313	0.23436	0.23573	0.23681	0.23766	0.23852	0.23919	0.24005	0.24062	0.2413	0.24339	0.24475															1242.05003	1.93E-4	-8.6E-5	1.6E-4
							2058.83	0.01138	0.01148	2938.29692	-79352	2938.29692	-477556		2938.29692	0.23256	0.23379	0.23516	0.23625	0.2371	0.23797	0.23864	0.23948	0.24005	0.24075	0.24282	0.24419															1241.0857	2.14E-4	-1.22E-4	1.5E-4
							2059.8	0.01149	0.0116	2937.3326	-95485	2937.3326	-559619		2937.3326	0.23195	0.23316	0.23454	0.23563	0.23647	0.23735	0.23804	0.23885	0.23944	0.24014	0.2422	0.24358															1240.12138	2.29E-4	-1.09E-4	1.52E-4
							2060.76	0.0116	0.01171	2936.36828	-103817	2936.36827	-601132		2936.36828	0.23128	0.23249	0.23388	0.23496	0.2358	0.23667	0.23738	0.23818	0.23878	0.23946	0.24154	0.24292															1239.15706	2.45E-4	-6.4E-5	1.62E-4
							2061.73	0.01172	0.01183	2935.40395	-104935	2935.40395	-603359		2935.40395	0.23054	0.23176	0.23316	0.23423	0.23509	0.23595	0.23666	0.23745	0.23807	0.23872	0.24083	0.2422															1238.19273	2.52E-4	-3.6E-5	1.81E-4
							2062.69	0.01185	0.01195	2934.43963	-102239	2934.43963	-573254		2934.43963	0.22976	0.23099	0.23238	0.23345	0.23432	0.23518	0.23589	0.23668	0.23731	0.23795	0.24005	0.24143															1237.22841	2.31E-4	-2.1E-5	1.99E-4
							2063.65	0.01197	0.01206	2933.4753	-96857	2933.4753	-518161		2933.4753	0.22894	0.23016	0.23156	0.23262	0.2335	0.23436	0.23507	0.23586	0.2365	0.23713	0.23921	0.24061															1236.26408	2.13E-4	-2.8E-5	2.12E-4
							2064.62	0.01208	0.01216	2932.51098	-87250	2932.51098	-446179		2932.51098	0.22808	0.22928	0.23069	0.23175	0.23262	0.23348	0.23421	0.235	0.23564	0.23627	0.23833	0.23974															1235.29976	2.21E-4	-7.2E-5	2.27E-4
							2065.58	0.01218	0.01226	2931.54665	-72960	2931.54665	-364647		2931.54665	0.22717	0.22837	0.22979	0.23085	0.2317	0.23258	0.23329	0.23411	0.23472	0.23537	0.23743	0.23881															1234.33543	2.34E-4	-1.07E-4	2.35E-4
							2066.55	0.01227	0.01236	2930.58233	-55299	2930.58233	-279820		2930.58233	0.22622	0.22744	0.22884	0.22992	0.23075	0.23165	0.23234	0.23317	0.23378	0.23443	0.23649	0.23786															1233.37111	2.39E-4	-1.05E-4	2.33E-4
							2067.51	0.01237	0.01246	2929.618	-37131	2929.618	-198796		2929.618	0.22526	0.2265	0.22787	0.22896	0.22979	0.23069	0.23139	0.23221	0.23282	0.23348	0.23553	0.23691															1232.40678	2.44E-4	-8.7E-5	2.26E-4
							2068.48	0.01246	0.01256	2928.65368	-22679	2928.65368	-130866		2928.65368	0.2243	0.22554	0.22691	0.228	0.22884	0.22972	0.23042	0.23126	0.23186	0.23252	0.23456	0.23594															1231.44246	2.6E-4	-6.9E-5	2.19E-4
							2069.44	0.01255	0.01265	2927.68935	-14026	2927.68935	-83350		2927.68935	0.22335	0.22458	0.22595	0.22704	0.22789	0.22875	0.22945	0.2303	0.23088	0.23156	0.2336	0.23497															1230.47813	2.81E-4	-3.8E-5	2.17E-4
							2070.4	0.01265	0.01273	2926.72503	-10406	2926.72503	-53719		2926.72503	0.22238	0.22361	0.22499	0.22607	0.22693	0.22779	0.22849	0.22932	0.2299	0.23059	0.23264	0.234															1229.51381	2.9E-4	8E-6	2.15E-4
							2071.37	0.01274	0.01282	2925.76071	-11608	2925.7607	-35531		2925.76071	0.22143	0.22266	0.22403	0.22512	0.22597	0.22684	0.22753	0.22837	0.22894	0.22963	0.23169	0.23304															1228.54949	2.82E-4	3.6E-5	2E-4
							2072.33	0.01284	0.01292	2924.79638	-17631	2924.79638	-26360		2924.79638	0.22047	0.22172	0.22309	0.22418	0.22503	0.22592	0.22659	0.22744	0.228	0.22869	0.23074	0.23208															1227.58516	2.81E-4	9E-6	1.91E-4
							2073.3	0.01294	0.01303	2923.83206	-26824	2923.83206	-25984		2923.83206	0.21952	0.2208	0.22215	0.22326	0.2241	0.22499	0.22567	0.22653	0.22708	0.22777	0.22978	0.23114															1226.62084	2.88E-4	-5E-5	1.94E-4
							2074.26	0.01302	0.01311	2922.86773	-36766	2922.86773	-33319		2922.86773	0.21857	0.21987	0.22121	0.22234	0.22317	0.22406	0.22475	0.2256	0.22616	0.22685	0.22883	0.23021															1225.65651	2.8E-4	-7.7E-5	1.9E-4
							2075.23	0.01309	0.01318	2921.90341	-44926	2921.90341	-43668		2921.90341	0.21763	0.21894	0.22028	0.22142	0.22224	0.22313	0.22382	0.22466	0.22523	0.22592	0.22788	0.22926															1224.69219	2.7E-4	-5.1E-5	1.89E-4
							2076.19	0.01318	0.01326	2920.93908	-48480	2920.93908	-47840		2920.93908	0.21669	0.21801	0.21935	0.22049	0.2213	0.2222	0.22288	0.22372	0.22429	0.225	0.22693	0.22832															1223.72786	2.7E-4	-1.7E-5	1.97E-4
							2077.16	0.01327	0.01335	2919.97476	-44764	2919.97476	-38716		2919.97476	0.21572	0.21704	0.21839	0.21953	0.22034	0.22124	0.22193	0.22276	0.22332	0.22404	0.22594	0.22737															1222.76354	2.58E-4	-1.2E-5	2.04E-4
							2078.12	0.01336	0.01342	2919.01043	-32893	2919.01043	-21351		2919.01043	0.21471	0.21604	0.2174	0.21853	0.21933	0.22022	0.22092	0.22176	0.22231	0.22303	0.22491	0.22637															1221.79921	2.27E-4	-8E-6	2.05E-4
							2079.08	0.01343	0.0135	2918.04611	-14417	2918.04611	-4627		2918.04611	0.21366	0.21498	0.21635	0.21749	0.21827	0.21918	0.21986	0.22073	0.22126	0.22198	0.22386	0.22531															1220.83489	2.07E-4	1.2E-5	1.99E-4
							2080.05	0.01351	0.01359	2917.08178	8121	2917.08178	13612		2917.08178	0.21258	0.2139	0.21526	0.2164	0.21718	0.21811	0.21875	0.21964	0.22017	0.22089	0.22278	0.22421															1219.87056	2.22E-4	2.3E-5	1.86E-4
							2081.01	0.01357	0.01366	2916.11746	33001	2916.11746	39791		2916.11746	0.21145	0.21279	0.21415	0.21529	0.21608	0.217	0.21762	0.21853	0.21905	0.21978	0.22165	0.22308															1218.90624	2.35E-4	1.6E-5	1.7E-4
							2081.98	0.01363	0.01372	2915.15314	59645	2915.15313	74495		2915.15314	0.21032	0.21167	0.21302	0.21417	0.21498	0.21588	0.2165	0.21741	0.21794	0.21867	0.22053	0.22197															1217.94192	2.12E-4	-1.1E-5	1.52E-4
							2082.94	0.0137	0.01378	2914.18881	85613	2914.18881	115375		2914.18881	0.20922	0.21057	0.21192	0.21307	0.21387	0.21477	0.2154	0.21633	0.21686	0.21757	0.21944	0.22088															1216.97759	1.89E-4	-4.6E-5	1.42E-4
							2083.91	0.01379	0.01385	2913.22449	106504	2913.22449	160421		2913.22449	0.20816	0.20949	0.21084	0.212	0.21277	0.21369	0.21434	0.21526	0.2158	0.21651	0.21838	0.21983															1216.01327	1.77E-4	-7.7E-5	1.48E-4
							2084.87	0.01387	0.01392	2912.26016	121079	2912.26016	203778		2912.26016	0.20713	0.20846	0.2098	0.21097	0.21172	0.21265	0.21331	0.21422	0.21476	0.21548	0.21735	0.21881															1215.04894	1.5E-4	-1.17E-4	1.65E-4
							2085.83	0.01393	0.01398	2911.29584	131522	2911.29584	238492		2911.29584	0.20614	0.20747	0.20881	0.21	0.21074	0.21168	0.21233	0.21322	0.21377	0.2145	0.21637	0.21783															1214.08462	1.19E-4	-1.61E-4	1.78E-4
							2086.8	0.01399	0.01405	2910.33151	137944	2910.33151	264742		2910.33151	0.2052	0.20654	0.20787	0.20906	0.20982	0.21077	0.2114	0.2123	0.21284	0.21357	0.21545	0.21689															1213.12029	1.04E-4	-1.72E-4	1.79E-4
							2087.76	0.01405	0.01412	2909.36719	138779	2909.36719	284545		2909.36719	0.20429	0.20565	0.20698	0.20816	0.20893	0.20988	0.2105	0.21142	0.21194	0.21269	0.21457	0.21601															1212.15597	1.03E-4	-1.48E-4	1.77E-4
							2088.73	0.01411	0.01418	2908.40286	135036	2908.40286	294341		2908.40286	0.20343	0.20479	0.20613	0.20729	0.20808	0.20902	0.20965	0.21056	0.21109	0.21184	0.21373	0.21516															1211.19164	1.03E-4	-1.52E-4	1.77E-4
							2089.69	0.01417	0.01423	2907.43854	129089	2907.43854	291776		2907.43854	0.20261	0.20397	0.20531	0.20648	0.20727	0.20821	0.20885	0.20974	0.21028	0.21102	0.21292	0.21436															1210.22732	9.9E-5	-1.96E-4	1.67E-4
							2090.66	0.01422	0.01428	2906.47421	122504	2906.47421	282294		2906.47421	0.20184	0.2032	0.20453	0.20571	0.20649	0.20744	0.20808	0.20896	0.20951	0.21025	0.21214	0.21358															1209.26299	8.9E-5	-2.1E-4	1.46E-4
							2091.62	0.01425	0.01434	2905.50989	117157	2905.50989	271743		2905.50989	0.20109	0.20245	0.20378	0.20497	0.20574	0.20671	0.20734	0.20822	0.20876	0.20951	0.2114	0.21285															1208.29867	8.6E-5	-1.83E-4	1.22E-4
							2092.58	0.0143	0.01439	2904.54557	113988	2904.54556	259320		2904.54557	0.20037	0.20174	0.20306	0.20426	0.20502	0.20599	0.20663	0.20751	0.20806	0.2088	0.21071	0.21215															1207.33435	9E-5	-1.66E-4	1.05E-4
							2093.55	0.01435	0.01444	2903.58124	110627	2903.58124	243072		2903.58124	0.19968	0.20105	0.20238	0.20357	0.20434	0.2053	0.20595	0.20682	0.20738	0.20812	0.21005	0.21148															1206.37002	9.8E-5	-1.79E-4	1.13E-4
							2094.51	0.0144	0.01447	2902.61692	104490	2902.61692	223855		2902.61692	0.19903	0.20038	0.20174	0.20291	0.20369	0.20465	0.20531	0.20618	0.20673	0.20747	0.20943	0.21084															1205.4057	1.11E-4	-2.02E-4	1.41E-4
							2095.48	0.01446	0.01451	2901.65259	97426	2901.65259	201406		2901.65259	0.19841	0.19975	0.20113	0.20228	0.20308	0.20402	0.20469	0.20556	0.20612	0.20686	0.20882	0.21023															1204.44137	1.15E-4	-2.05E-4	1.61E-4
							2096.44	0.01452	0.01456	2900.68827	93553	2900.68827	173233		2900.68827	0.19781	0.19915	0.20053	0.20167	0.20248	0.20343	0.20408	0.20497	0.20554	0.20627	0.20824	0.20966															1203.47705	9.8E-5	-1.97E-4	1.61E-4
							2097.41	0.01456	0.01461	2899.72394	93582	2899.72394	139317		2899.72394	0.19723	0.19856	0.19994	0.20108	0.2019	0.20284	0.2035	0.20439	0.20497	0.20569	0.20768	0.2091															1202.51272	8E-5	-1.95E-4	1.56E-4
							2098.37	0.01461	0.01464	2898.75962	94798	2898.75962	104445		2898.75962	0.19666	0.19799	0.19936	0.2005	0.20133	0.20227	0.20293	0.20383	0.2044	0.20511	0.20713	0.20855															1201.5484	7.8E-5	-1.88E-4	1.62E-4
							2099.33	0.01466	0.01467	2897.79529	95675	2897.79529	75361		2897.79529	0.19611	0.19743	0.1988	0.19994	0.20078	0.20172	0.20238	0.20328	0.20384	0.20456	0.20659	0.20801															1200.58407	9.9E-5	-1.74E-4	1.69E-4
							2100.3	0.0147	0.01472	2896.83097	96861	2896.83097	56711		2896.83097	0.19555	0.19688	0.19824	0.19938	0.20022	0.20117	0.20183	0.20273	0.20328	0.20401	0.20605	0.20747
							2101.26	0.01474	0.01477	2895.86664	99411	2895.86664	49338		2895.86664	0.19497	0.1963	0.19766	0.19881	0.19965	0.2006	0.20127	0.20217	0.20273	0.20345	0.20551	0.20692
							2102.23	0.01478	0.01481	2894.90232	103885	2894.90232	51117		2894.90232	0.19439	0.19571	0.1971	0.19825	0.19909	0.20002	0.20072	0.2016	0.20219	0.20289	0.20497	0.20637
							2103.19	0.01483	0.01483	2893.93799	110123	2893.93799	61470		2893.93799	0.19381	0.19512	0.19653	0.19768	0.19852	0.19943	0.20017	0.20103	0.20162	0.20231	0.20443	0.20582
							2104.16	0.01487	0.01486	2892.97367	117319	2892.97367	83167		2892.97367	0.19321	0.19453	0.19594	0.19709	0.19794	0.19884	0.19959	0.20044	0.20104	0.20172	0.20386	0.20525
							2105.12	0.01491	0.01488	2892.00935	124271	2892.00935	116487		2892.00935	0.19261	0.19394	0.19536	0.19649	0.19735	0.19825	0.19901	0.19984	0.20046	0.20114	0.20328	0.20467
							2106.08	0.01493	0.01492	2891.04502	129810	2891.04502	157961		2891.04502	0.19202	0.19334	0.19477	0.1959	0.19676	0.19767	0.19843	0.19925	0.19988	0.20055	0.2027	0.20409
							2107.05	0.01495	0.01496	2890.0807	132564	2890.0807	205600		2890.0807	0.19143	0.19274	0.19417	0.1953	0.19617	0.19708	0.19783	0.19867	0.1993	0.19997	0.20213	0.20351
							2108.01	0.01498	0.01498	2889.11637	130550	2889.11637	257289		2889.11637	0.19083	0.19214	0.19358	0.19471	0.19558	0.19648	0.19723	0.19808	0.19872	0.19939	0.20156	0.20293
							2108.98	0.01502	0.01499	2888.15205	122834	2888.15205	307445		2888.15205	0.19025	0.19156	0.193	0.19413	0.195	0.19591	0.19666	0.19751	0.19815	0.19883	0.20099	0.20236
							2109.94	0.01506	0.01501	2887.18772	109761	2887.18772	350685		2887.18772	0.18969	0.19099	0.19245	0.19356	0.19444	0.19535	0.19611	0.19695	0.19759	0.19827	0.20044	0.20183
							2110.91	0.01508	0.01503	2886.2234	91099	2886.2234	382888		2886.2234	0.18915	0.19043	0.1919	0.19301	0.1939	0.19481	0.19557	0.19641	0.19704	0.19772	0.1999	0.20131
							2111.87	0.01511	0.01505	2885.25907	65951	2885.25907	395850		2885.25907	0.18862	0.1899	0.19136	0.19248	0.19338	0.19428	0.19505	0.19588	0.19651	0.19719	0.19939	0.2008
							2112.84	0.01515	0.01506	2884.29475	33907	2884.29475	377139		2884.29475	0.18812	0.18941	0.19087	0.19199	0.19289	0.19378	0.19456	0.19538	0.19603	0.1967	0.19892	0.20032
							2113.8	0.01518	0.01507	2883.33042	-4192	2883.33042	317517		2883.33042	0.18765	0.18896	0.19041	0.19155	0.19244	0.19332	0.19411	0.19494	0.19558	0.19625	0.19847	0.19988
							2114.76	0.0152	0.01509	2882.3661	-45681	2882.3661	216630		2882.3661	0.18722	0.18853	0.18998	0.19113	0.19201	0.1929	0.19368	0.19453	0.19517	0.19584	0.19805	0.19946
							2115.73	0.01522	0.01511	2881.40178	-86199	2881.40178	80986		2881.40178	0.18683	0.18812	0.18958	0.19073	0.19162	0.19251	0.19328	0.19414	0.19478	0.19545	0.19766	0.19907
							2116.69	0.01526	0.01513	2880.43745	-121772	2880.43745	-79265		2880.43745	0.18644	0.18775	0.18921	0.19035	0.19125	0.19213	0.19291	0.19376	0.19441	0.19508	0.1973	0.19869
							2117.66	0.01528	0.01513	2879.47313	-151110	2879.47313	-251122		2879.47313	0.18605	0.18736	0.18884	0.18996	0.19086	0.19175	0.19253	0.19339	0.19404	0.1947	0.19693	0.19832
							2118.62	0.01529	0.01515	2878.5088	-173701	2878.5088	-420858		2878.5088	0.18565	0.18695	0.18845	0.18957	0.19045	0.19136	0.19214	0.19299	0.19364	0.19432	0.19655	0.19794
							2119.59	0.0153	0.01516	2877.54448	-187378	2877.54448	-574627		2877.54448	0.18522	0.18651	0.18801	0.18914	0.19002	0.19093	0.19171	0.19256	0.1932	0.19389	0.19613	0.19754
							2120.55	0.01532	0.01518	2876.58015	-189625	2876.58015	-697149		2876.58015	0.18472	0.18603	0.18751	0.18866	0.18956	0.19046	0.19124	0.19208	0.19272	0.19341	0.19566	0.19706
							2121.51	0.01534	0.0152	2875.61583	-179915	2875.61583	-774476		2875.61583	0.18416	0.18548	0.18696	0.18811	0.18902	0.18992	0.19071	0.19155	0.1922	0.19287	0.19513	0.19652
							2122.48	0.01536	0.01521	2874.6515	-159738	2874.6515	-799809		2874.6515	0.18356	0.18487	0.18636	0.18751	0.18841	0.1893	0.1901	0.19095	0.1916	0.19226	0.19453	0.19591
							2123.44	0.01538	0.01521	2873.68718	-130414	2873.68718	-775261		2873.68718	0.18289	0.18418	0.18568	0.18682	0.18773	0.18861	0.18941	0.19027	0.19092	0.19158	0.19385	0.19524
							2124.41	0.01541	0.0152	2872.72285	-92811	2872.72285	-708595		2872.72285	0.18213	0.18343	0.18493	0.18606	0.18698	0.18786	0.18867	0.18952	0.19017	0.19083	0.1931	0.19449
							2125.37	0.01543	0.01519	2871.75853	-50629	2871.75853	-610495		2871.75853	0.18131	0.18261	0.18411	0.18523	0.18617	0.18705	0.18785	0.1887	0.18935	0.19002	0.19228	0.19368
							2126.34	0.01545	0.01519	2870.79421	-9507	2870.79421	-491779		2870.79421	0.18043	0.18174	0.18325	0.18437	0.1853	0.18619	0.18697	0.18783	0.18848	0.18916	0.19141	0.19281
							2127.3	0.01545	0.01519	2869.82988	27644	2869.82988	-360904		2869.82988	0.17952	0.18083	0.18234	0.18348	0.1844	0.18529	0.18606	0.18693	0.18758	0.18826	0.19051	0.1919
							2128.26	0.01545	0.0152	2868.86556	60371	2868.86556	-226519		2868.86556	0.17858	0.1799	0.18139	0.18255	0.18347	0.18436	0.18514	0.18601	0.18667	0.18734	0.18958	0.19098
							2129.23	0.01545	0.0152	2867.90123	88282	2867.90123	-100158		2867.90123	0.17764	0.17897	0.18044	0.18161	0.18252	0.18343	0.1842	0.18508	0.18573	0.1864	0.18864	0.19005
							2130.19	0.01546	0.01519	2866.93691	110334	2866.93691	7861		2866.93691	0.1767	0.17803	0.17951	0.18066	0.18158	0.1825	0.18327	0.18414	0.18479	0.18547	0.18771	0.18912
							2131.16	0.01547	0.01518	2865.97258	125162	2865.97258	92339		2865.97258	0.17576	0.17709	0.17858	0.17973	0.18066	0.18156	0.18234	0.18321	0.18385	0.18454	0.18678	0.18819
							2132.12	0.01547	0.01517	2865.00826	133042	2865.00826	152575		2865.00826	0.17484	0.17617	0.17767	0.17881	0.17974	0.18063	0.18143	0.1823	0.18294	0.18362	0.18586	0.18727
							2133.09	0.01548	0.01516	2864.04393	135755	2864.04393	191264		2864.04393	0.17395	0.17527	0.17677	0.17792	0.17883	0.17974	0.18053	0.1814	0.18204	0.18272	0.18495	0.18637
							2134.05	0.01548	0.01514	2863.07961	135001	2863.07961	212719		2863.07961	0.17308	0.1744	0.17588	0.17704	0.17796	0.17887	0.17965	0.18053	0.18117	0.18185	0.18408	0.1855
							2135.01	0.01548	0.01513	2862.11528	132156	2862.11528	219879		2862.11528	0.17224	0.17355	0.17505	0.17619	0.17712	0.17803	0.1788	0.17968	0.18032	0.181	0.18325	0.18466
							2135.98	0.01547	0.01511	2861.15096	127589	2861.15096	213347		2861.15096	0.17141	0.17274	0.17425	0.17538	0.1763	0.17721	0.17799	0.17886	0.17951	0.18019	0.18243	0.18385
							2136.94	0.01546	0.0151	2860.18664	120316	2860.18663	196462		2860.18664	0.17061	0.17195	0.17346	0.17459	0.17551	0.17642	0.1772	0.17805	0.17871	0.1794	0.18162	0.18305
							2137.91	0.01545	0.01509	2859.22231	108737	2859.22231	177749		2859.22231	0.16984	0.17117	0.17268	0.17381	0.17472	0.17564	0.17642	0.17728	0.17793	0.17862	0.18083	0.18227
							2138.87	0.01546	0.01507	2858.25799	91695	2858.25799	162831		2858.25799	0.16908	0.1704	0.1719	0.17304	0.17395	0.17488	0.17566	0.17652	0.17716	0.17784	0.18007	0.1815
							2139.84	0.01546	0.01506	2857.29366	69315	2857.29366	149115		2857.29366	0.16833	0.16965	0.17114	0.17228	0.1732	0.17411	0.17491	0.17578	0.17642	0.17708	0.17933	0.18074
							2140.8	0.01544	0.01504	2856.32934	42876	2856.32934	131245		2856.32934	0.16759	0.16891	0.1704	0.17154	0.17247	0.17337	0.17417	0.17504	0.17569	0.17634	0.1786	0.17999
							2141.76	0.01543	0.01502	2855.36501	15245	2855.36501	107232		2855.36501	0.16689	0.1682	0.16969	0.17083	0.17175	0.17265	0.17346	0.17433	0.17498	0.17564	0.17788	0.17928
							2142.73	0.01542	0.015	2854.40069	-9296	2854.40069	81565		2854.40069	0.16621	0.16751	0.16901	0.17014	0.17106	0.17197	0.17277	0.17365	0.1743	0.17496	0.17719	0.17859
							2143.69	0.01542	0.01498	2853.43636	-27121	2853.43636	63745		2853.43636	0.16554	0.16683	0.16834	0.16948	0.1704	0.17131	0.17211	0.17298	0.17363	0.17429	0.17651	0.17792
							2144.66	0.0154	0.01494	2852.47204	-36498	2852.47204	60098		2852.47204	0.16487	0.16617	0.16767	0.16883	0.16975	0.17066	0.17144	0.17231	0.17297	0.17363	0.17584	0.17726
							2145.62	0.01537	0.01491	2851.50771	-38006	2851.50771	68562		2851.50771	0.16421	0.16551	0.167	0.16816	0.1691	0.17001	0.17077	0.17163	0.1723	0.17296	0.17518	0.1766
							2146.59	0.01536	0.01489	2850.54339	-31535	2850.54339	83061		2850.54339	0.16349	0.16481	0.1663	0.16744	0.16839	0.1693	0.17007	0.17091	0.17158	0.17225	0.17447	0.17588
							2147.55	0.01534	0.01487	2849.57907	-14899	2849.57906	98507		2849.57907	0.16271	0.16404	0.16553	0.16666	0.1676	0.16851	0.16929	0.17014	0.1708	0.17147	0.17369	0.17509
							2148.52	0.01533	0.01484	2848.61474	9888	2848.61474	113858		2848.61474	0.16187	0.1632	0.1647	0.16583	0.16676	0.16767	0.16844	0.1693	0.16996	0.17062	0.17285	0.17424
							2149.48	0.01531	0.01481	2847.65042	37423	2847.65042	129551		2847.65042	0.16102	0.16234	0.16384	0.16499	0.16589	0.1668	0.16758	0.16844	0.16909	0.16976	0.17199	0.17338
							2150.44	0.0153	0.01478	2846.68609	64611	2846.68609	140548		2846.68609	0.16018	0.1615	0.163	0.16414	0.16504	0.16595	0.16674	0.16759	0.16825	0.16892	0.17114	0.17253
							2151.41	0.01529	0.01474	2845.72177	87415	2845.72177	140066		2845.72177	0.15936	0.16068	0.16218	0.16332	0.16422	0.16512	0.16593	0.16678	0.16743	0.1681	0.17031	0.1717
							2152.37	0.01526	0.01471	2844.75744	100722	2844.75744	129116		2844.75744	0.15858	0.1599	0.16139	0.16253	0.16344	0.16434	0.16515	0.166	0.16665	0.16731	0.16952	0.17092
							2153.34	0.01524	0.01467	2843.79312	103603	2843.79312	114520		2843.79312	0.15783	0.15914	0.16062	0.16178	0.16268	0.1636	0.16438	0.16524	0.1659	0.16656	0.16876	0.17017
							2154.3	0.01522	0.01463	2842.82879	98476	2842.82879	102329		2842.82879	0.1571	0.1584	0.15988	0.16105	0.16195	0.16287	0.16364	0.16451	0.16516	0.16582	0.16802	0.16944
							2155.27	0.01519	0.0146	2841.86447	87807	2841.86447	94849		2841.86447	0.15638	0.15768	0.15916	0.16034	0.16123	0.16215	0.16291	0.16379	0.16443	0.1651	0.16729	0.16871
							2156.23	0.01516	0.01456	2840.90014	74563	2840.90014	90135		2840.90014	0.15567	0.15697	0.15846	0.15963	0.16053	0.16144	0.16221	0.16309	0.16372	0.16439	0.16656	0.168
							2157.19	0.01513	0.01453	2839.93582	62323	2839.93582	85840		2839.93582	0.15498	0.15629	0.15777	0.15892	0.15983	0.16074	0.16151	0.16238	0.16302	0.16369	0.16586	0.1673
							2158.16	0.01509	0.01449	2838.9715	52779	2838.97149	81860		2838.9715	0.15428	0.1556	0.15708	0.15823	0.15913	0.16005	0.16082	0.16168	0.16233	0.163	0.16517	0.16659
							2159.12	0.01504	0.01444	2838.00717	46100	2838.00717	76814		2838.00717	0.15359	0.15491	0.15639	0.15754	0.15844	0.15935	0.16013	0.16099	0.16164	0.16231	0.16448	0.16589
							2160.09	0.015	0.01439	2837.04285	42695	2837.04285	70329		2837.04285	0.15291	0.15422	0.15571	0.15685	0.15776	0.15866	0.15945	0.16031	0.16096	0.16162	0.16379	0.16519
							2161.05	0.01496	0.01434	2836.07852	41482	2836.07852	65364		2836.07852	0.15223	0.15355	0.15503	0.15617	0.15709	0.15798	0.15876	0.15962	0.16027	0.16093	0.1631	0.1645
							2162.02	0.01493	0.0143	2835.1142	40850	2835.1142	62024		2835.1142	0.15157	0.15289	0.15436	0.15551	0.15643	0.15731	0.15808	0.15895	0.1596	0.16026	0.16242	0.16382
							2162.98	0.01489	0.01424	2834.14987	40920	2834.14987	58045		2834.14987	0.15091	0.15223	0.15369	0.15485	0.15576	0.15665	0.15741	0.15829	0.15894	0.1596	0.16175	0.16315
							2163.94	0.01486	0.01419	2833.18555	41313	2833.18555	52713		2833.18555	0.15026	0.15157	0.15304	0.1542	0.1551	0.15599	0.15675	0.15764	0.15828	0.15894	0.16108	0.16249
							2164.91	0.01482	0.01414	2832.22122	41069	2832.22122	45047		2832.22122	0.1496	0.15092	0.15238	0.15353	0.15444	0.15534	0.15609	0.15699	0.15762	0.15829	0.16041	0.16183
							2165.87	0.01478	0.0141	2831.2569	39587	2831.2569	35324		2831.2569	0.14895	0.15027	0.15173	0.15288	0.15379	0.15469	0.15544	0.15634	0.15697	0.15764	0.15975	0.16118
							2166.84	0.01473	0.01405	2830.29257	36194	2830.29257	26827		2830.29257	0.1483	0.14963	0.15108	0.15223	0.15313	0.15404	0.15479	0.15569	0.15632	0.15698	0.1591	0.16052
							2167.8	0.01468	0.014	2829.32825	32290	2829.32825	22176		2829.32825	0.14767	0.149	0.15044	0.15159	0.15249	0.1534	0.15414	0.15504	0.15567	0.15634	0.15845	0.15987
							2168.77	0.01464	0.01393	2828.36393	30095	2828.36392	21952		2828.36393	0.14704	0.14837	0.1498	0.15096	0.15185	0.15275	0.15351	0.1544	0.15502	0.1557	0.15781	0.15923
							2169.73	0.01459	0.01387	2827.3996	29093	2827.3996	25369		2827.3996	0.14641	0.14773	0.14917	0.15033	0.15121	0.15212	0.15288	0.15376	0.15439	0.15506	0.15717	0.15859
							2170.69	0.01454	0.01381	2826.43528	28445	2826.43528	29670		2826.43528	0.14578	0.14711	0.14855	0.1497	0.15059	0.15149	0.15226	0.15313	0.15376	0.15442	0.15654	0.15795
							2171.66	0.0145	0.01375	2825.47095	29025	2825.47095	33017		2825.47095	0.14515	0.14649	0.14793	0.14908	0.14997	0.15087	0.15164	0.1525	0.15314	0.1538	0.1559	0.15732
							2172.62	0.01446	0.01367	2824.50663	30329	2824.50663	35326		2824.50663	0.14452	0.14586	0.14732	0.14846	0.14934	0.15024	0.15102	0.15188	0.15252	0.15317	0.15527	0.15669
							2173.59	0.0144	0.01361	2823.5423	30383	2823.5423	34852		2823.5423	0.14389	0.14524	0.1467	0.14784	0.14871	0.14963	0.15039	0.15126	0.15189	0.15255	0.15465	0.15605
							2174.55	0.01434	0.01356	2822.57798	29696	2822.57798	29708		2822.57798	0.14328	0.14463	0.14608	0.14722	0.14809	0.14901	0.14976	0.15064	0.15127	0.15193	0.15403	0.15542
							2175.52	0.01428	0.01352	2821.61365	29610	2821.61365	20612		2821.61365	0.14268	0.14402	0.14545	0.14661	0.14749	0.1484	0.14914	0.15003	0.15064	0.15131	0.1534	0.1548
							2176.48	0.01422	0.01347	2820.64933	28602	2820.64933	10124		2820.64933	0.14209	0.14341	0.14483	0.146	0.14688	0.14779	0.14853	0.14941	0.15003	0.1507	0.15278	0.15417
							2177.44	0.01419	0.0134	2819.685	25750	2819.685	949		2819.685	0.14149	0.1428	0.14423	0.14539	0.14628	0.14718	0.14792	0.14879	0.14942	0.15009	0.15216	0.15355
							2178.41	0.01414	0.01332	2818.72068	23040	2818.72068	-4945		2818.72068	0.14088	0.14218	0.14363	0.14478	0.14566	0.14658	0.14732	0.14818	0.14881	0.14948	0.15155	0.15293
							2179.37	0.01408	0.01326	2817.75636	21017	2817.75635	-6053		2817.75636	0.14027	0.14158	0.14303	0.14417	0.14505	0.14597	0.14672	0.14757	0.1482	0.14887	0.15093	0.15233
							2180.34	0.01401	0.01322	2816.79203	18656	2816.79203	-2598		2816.79203	0.13966	0.14099	0.14243	0.14357	0.14444	0.14536	0.14612	0.14696	0.14759	0.14826	0.15032	0.15173
							2181.3	0.01395	0.01316	2815.82771	16716	2815.82771	1425		2815.82771	0.13906	0.14039	0.14182	0.14297	0.14385	0.14476	0.14551	0.14636	0.14699	0.14766	0.14972	0.15113
							2182.27	0.01388	0.01308	2814.86338	16566	2814.86338	1960		2814.86338	0.13846	0.1398	0.14122	0.14237	0.14325	0.14415	0.1449	0.14575	0.14638	0.14705	0.14912	0.15052
							2183.23	0.01382	0.01301	2813.89906	17878	2813.89906	-213		2813.89906	0.13786	0.1392	0.14063	0.14178	0.14265	0.14355	0.1443	0.14516	0.14577	0.14645	0.14851	0.1499
							2184.2	0.01376	0.01295	2812.93473	19729	2812.93473	-2338		2812.93473	0.13726	0.13859	0.14003	0.14117	0.14204	0.14294	0.14368	0.14456	0.14516	0.14584	0.1479	0.14928
							2185.16	0.0137	0.01289	2811.97041	22126	2811.97041	-3977		2811.97041	0.13667	0.13799	0.13943	0.14055	0.14143	0.14235	0.14308	0.14395	0.14455	0.14524	0.14729	0.14867
							2186.12	0.01363	0.01281	2811.00608	24813	2811.00608	-4766		2811.00608	0.13607	0.1374	0.13883	0.13996	0.14083	0.14175	0.14248	0.14335	0.14396	0.14463	0.14668	0.14807
							2187.09	0.01356	0.01274	2810.04176	26726	2810.04176	-4816		2810.04176	0.13547	0.1368	0.13823	0.13936	0.14023	0.14115	0.14188	0.14274	0.14336	0.14402	0.14607	0.14746
							2188.05	0.0135	0.01268	2809.07743	27497	2809.07743	-7239		2809.07743	0.13486	0.1362	0.13762	0.13876	0.13962	0.14053	0.14127	0.14212	0.14274	0.1434	0.14546	0.14685
							2189.02	0.01343	0.01261	2808.11311	26950	2808.11311	-11812		2808.11311	0.13426	0.13559	0.13701	0.13815	0.13901	0.13992	0.14066	0.14151	0.14213	0.14279	0.14485	0.14623
							2189.98	0.01336	0.01254	2807.14878	25416	2807.14878	-13948		2807.14878	0.13367	0.13499	0.13641	0.13755	0.1384	0.13932	0.14006	0.14091	0.14152	0.14218	0.14425	0.14562
							2190.95	0.01329	0.01248	2806.18446	24515	2806.18446	-15280		2806.18446	0.13307	0.13438	0.1358	0.13694	0.13779	0.1387	0.13944	0.14029	0.14091	0.14157	0.14362	0.14499
							2191.91	0.01323	0.01241	2805.22014	24658	2805.22014	-20724		2805.22014	0.13245	0.13376	0.13518	0.13633	0.13717	0.13808	0.13881	0.13967	0.14029	0.14096	0.14299	0.14436
							2192.87	0.01316	0.01234	2804.25581	24117	2804.25581	-28278		2804.25581	0.13184	0.13314	0.13456	0.13571	0.13656	0.13746	0.1382	0.13906	0.13967	0.14034	0.14237	0.14374
							2193.84	0.01308	0.01226	2803.29149	22009	2803.29149	-32413		2803.29149	0.13123	0.13253	0.13395	0.13509	0.13594	0.13685	0.13758	0.13844	0.13905	0.13972	0.14174	0.14312
							2194.8	0.01302	0.01218	2802.32716	18966	2802.32716	-31876		2802.32716	0.13062	0.13191	0.13335	0.13447	0.13532	0.13622	0.13696	0.13781	0.13842	0.13909	0.14112	0.1425
							2195.77	0.01296	0.01211	2801.36284	16157	2801.36284	-27469		2801.36284	0.13001	0.1313	0.13274	0.13385	0.13471	0.13561	0.13634	0.1372	0.13781	0.13847	0.14049	0.14187
							2196.73	0.01292	0.01204	2800.39851	14866	2800.39851	-18340		2800.39851	0.1294	0.13069	0.13212	0.13323	0.1341	0.13499	0.13573	0.13659	0.1372	0.13785	0.13987	0.14124
							2197.7	0.01285	0.01196	2799.43419	16011	2799.43419	-6764		2799.43419	0.12878	0.13008	0.1315	0.13262	0.13349	0.13436	0.13511	0.13596	0.13658	0.13722	0.13923	0.14061
							2198.66	0.01278	0.01188	2798.46986	19294	2798.46986	378		2798.46986	0.12814	0.12945	0.13087	0.13199	0.13286	0.13372	0.13447	0.13533	0.13594	0.13658	0.13859	0.13997
							2199.62	0.0127	0.0118	2797.50554	22663	2797.50554	1458		2797.50554	0.12752	0.12882	0.13024	0.13136	0.13223	0.13308	0.13383	0.13469	0.1353	0.13595	0.13795	0.13933
							2200.59	0.01263	0.01174	2796.54121	24264	2796.54121	2514		2796.54121	0.1269	0.12819	0.12961	0.13072	0.13159	0.13244	0.1332	0.13406	0.13465	0.13531	0.13731	0.13868
							2201.55	0.01255	0.01167	2795.57689	24549	2795.57689	5282		2795.57689	0.12627	0.12756	0.12897	0.13008	0.13094	0.1318	0.13257	0.13342	0.13401	0.13467	0.13666	0.13802
							2202.52	0.01246	0.01159	2794.61257	24365	2794.61257	5008		2794.61257	0.12565	0.12693	0.12834	0.12944	0.1303	0.13116	0.13193	0.13278	0.13338	0.13403	0.13602	0.13737
							2203.48	0.01239	0.01151	2793.64824	23563	2793.64824	2805		2793.64824	0.12502	0.1263	0.12771	0.12881	0.12967	0.13053	0.1313	0.13213	0.13274	0.13339	0.13539	0.13674
							2204.45	0.01233	0.01144	2792.68392	22469	2792.68392	3466		2792.68392	0.1244	0.12566	0.12708	0.12818	0.12903	0.1299	0.13066	0.13149	0.13211	0.13275	0.13475	0.1361
							2205.41	0.01227	0.01137	2791.71959	22659	2791.71959	4955		2791.71959	0.12377	0.12502	0.12645	0.12754	0.1284	0.12926	0.13001	0.13085	0.13147	0.13211	0.13411	0.13545
							2206.37	0.0122	0.01129	2790.75527	24014	2790.75527	4344		2790.75527	0.12313	0.1244	0.12581	0.12691	0.12776	0.12863	0.12938	0.13021	0.13083	0.13147	0.13347	0.13481
							2207.34	0.01213	0.01121	2789.79094	23433	2789.79094	5310		2789.79094	0.1225	0.12377	0.12517	0.12627	0.12713	0.12799	0.12874	0.12956	0.13019	0.13082	0.13283	0.13416
							2208.3	0.01205	0.01113	2788.82662	19804	2788.82662	8694		2788.82662	0.12186	0.12313	0.12453	0.12562	0.12649	0.12734	0.1281	0.12891	0.12953	0.13017	0.13217	0.1335
							2209.27	0.01197	0.01105	2787.86229	15731	2787.86229	8757		2787.86229	0.12123	0.12249	0.1239	0.12498	0.12585	0.12671	0.12746	0.12826	0.12889	0.12952	0.13151	0.13284
							2210.23	0.01188	0.01096	2786.89797	12927	2786.89797	5964		2786.89797	0.1206	0.12187	0.12326	0.12434	0.12522	0.12607	0.12682	0.12762	0.12825	0.12888	0.13087	0.13219
							2211.2	0.01179	0.01087	2785.93364	12020	2785.93364	7408		2785.93364	0.11997	0.12124	0.12262	0.12371	0.12458	0.12543	0.12618	0.12697	0.1276	0.12824	0.13023	0.13155
							2212.16	0.01172	0.01081	2784.96932	14001	2784.96932	13366		2784.96932	0.11934	0.12061	0.12198	0.12307	0.12394	0.12479	0.12553	0.12634	0.12696	0.12759	0.12959	0.1309
							2213.12	0.01165	0.01075	2784.005	17614	2784.005	19277		2784.005	0.11872	0.11998	0.12136	0.12244	0.12331	0.12416	0.12489	0.12571	0.12633	0.12695	0.12896	0.13026
							2214.09	0.01158	0.01067	2783.04067	19579	2783.04067	24714		2783.04067	0.1181	0.11935	0.12074	0.12182	0.12268	0.12354	0.12426	0.12508	0.1257	0.12632	0.12833	0.12962
							2215.05	0.01151	0.01059	2782.07635	18751	2782.07635	30408		2782.07635	0.11747	0.11872	0.12011	0.12119	0.12205	0.1229	0.12362	0.12444	0.12506	0.12568	0.12769	0.12897
							2216.02	0.01144	0.01052	2781.11202	17408	2781.11202	35020		2781.11202	0.11685	0.1181	0.11948	0.12057	0.12142	0.12225	0.123	0.1238	0.12442	0.12505	0.12705	0.12833
							2216.98	0.01137	0.01045	2780.1477	17693	2780.1477	37313		2780.1477	0.11623	0.11747	0.11886	0.11994	0.12081	0.12162	0.12238	0.12317	0.12379	0.12443	0.12642	0.1277
							2217.95	0.01131	0.01037	2779.18337	18647	2779.18337	38188		2779.18337	0.11562	0.11685	0.11825	0.11931	0.12018	0.121	0.12176	0.12254	0.12317	0.1238	0.12579	0.12707
							2218.91	0.01125	0.01029	2778.21905	19167	2778.21905	39104		2778.21905	0.11502	0.11623	0.11764	0.1187	0.11955	0.12039	0.12114	0.12193	0.12255	0.12318	0.12517	0.12644
							2219.88	0.01118	0.01019	2777.25472	19916	2777.25472	38381		2777.25472	0.11442	0.11562	0.11703	0.11809	0.11895	0.11977	0.12053	0.12132	0.12193	0.12256	0.12455	0.12583
							2220.84	0.0111	0.01011	2776.2904	20098	2776.2904	36594		2776.2904	0.11382	0.11502	0.11641	0.11748	0.11834	0.11916	0.11991	0.1207	0.12133	0.12193	0.12392	0.12521
							2221.8	0.01103	0.01004	2775.32607	18044	2775.32607	37808		2775.32607	0.11321	0.11442	0.1158	0.11687	0.11772	0.11855	0.11929	0.12008	0.12071	0.12131	0.12329	0.12458
							2222.77	0.01098	0.00997	2774.36175	14992	2774.36175	39652		2774.36175	0.11259	0.11381	0.11519	0.11625	0.11711	0.11794	0.11867	0.11947	0.1201	0.1207	0.12268	0.12396
							2223.73	0.01092	0.0099	2773.39743	13379	2773.39742	37597		2773.39743	0.11199	0.11321	0.11459	0.11565	0.11651	0.11733	0.11806	0.11886	0.11949	0.12009	0.12207	0.12334
							2224.7	0.01087	0.00982	2772.4331	13657	2772.4331	34583		2772.4331	0.11141	0.11262	0.114	0.11506	0.11593	0.11674	0.11747	0.11826	0.11889	0.11949	0.12147	0.12274
							2225.66	0.01084	0.00975	2771.46878	15522	2771.46878	33452		2771.46878	0.11084	0.11204	0.11342	0.11448	0.11535	0.11616	0.11689	0.11767	0.1183	0.1189	0.12088	0.12215
							2226.63	0.01082	0.00968	2770.50445	18816	2770.50445	32218		2770.50445	0.11026	0.11146	0.11284	0.11389	0.11476	0.11557	0.11631	0.11708	0.11771	0.11831	0.12028	0.12155
							2227.59	0.01079	0.00959	2769.54013	21669	2769.54013	30892		2769.54013	0.10968	0.11087	0.11226	0.1133	0.11417	0.11497	0.11572	0.11649	0.11712	0.11772	0.11969	0.12094
							2228.55	0.01077	0.00949	2768.5758	22128	2768.5758	30502		2768.5758	0.1091	0.11029	0.11168	0.11272	0.11358	0.11438	0.11513	0.1159	0.11652	0.11713	0.11909	0.12034
							2229.52	0.01076	0.00941	2767.61148	21374	2767.61148	29808		2767.61148	0.10853	0.10972	0.1111	0.11213	0.11301	0.1138	0.11455	0.11532	0.11594	0.11654	0.11851	0.11975
							2230.48	0.01075	0.00935	2766.64715	20858	2766.64715	28598		2766.64715	0.10797	0.10915	0.11053	0.11156	0.11243	0.11323	0.11397	0.11475	0.11536	0.11595	0.11793	0.11917
							2231.45	0.01075	0.00927	2765.68283	19886	2765.68283	27544		2765.68283	0.10742	0.10859	0.10997	0.11099	0.11185	0.11265	0.11339	0.11418	0.11479	0.11538	0.11735	0.11859
							2232.41	0.01074	0.00919	2764.7185	18614	2764.7185	25784		2764.7185	0.10685	0.10803	0.10941	0.11043	0.11128	0.11208	0.11282	0.1136	0.11422	0.1148	0.11677	0.11801
							2233.38	0.01073	0.00912	2763.75418	17985	2763.75418	21294		2763.75418	0.10628	0.10746	0.10885	0.10985	0.11071	0.11151	0.11224	0.11303	0.11365	0.11422	0.11619	0.11742
							2234.34	0.01069	0.00904	2762.78986	17411	2762.78985	14230		2762.78986	0.10571	0.10689	0.10828	0.10928	0.11014	0.11094	0.11168	0.11245	0.11307	0.11365	0.11561	0.11684
							2235.3	0.01063	0.00895	2761.82553	16524	2761.82553	8389		2761.82553	0.10516	0.10633	0.10771	0.10872	0.10957	0.11038	0.11112	0.11188	0.11249	0.11308	0.11504	0.11627
							2236.27	0.01055	0.00886	2760.86121	16331	2760.86121	6552		2760.86121	0.1046	0.10578	0.10715	0.10816	0.109	0.10981	0.11055	0.11131	0.11192	0.11251	0.11446	0.11569
							2237.23	0.01045	0.00878	2759.89688	17565	2759.89688	7209		2759.89688	0.10404	0.10522	0.10658	0.10759	0.10842	0.10924	0.10997	0.11073	0.11135	0.11194	0.11388	0.11511
							2238.2	0.01033	0.00872	2758.93256	20078	2758.93256	8097		2758.93256	0.10348	0.10464	0.10603	0.10703	0.10787	0.10867	0.1094	0.11016	0.11077	0.11137	0.11331	0.11453
							2239.16	0.0102	0.00864	2757.96823	23362	2757.96823	10620		2757.96823	0.10293	0.10408	0.10547	0.10647	0.10732	0.10811	0.10884	0.10959	0.11021	0.1108	0.11275	0.11396
							2240.13	0.01006	0.00856	2757.00391	26898	2757.00391	17127		2757.00391	0.10238	0.10353	0.10492	0.10591	0.10677	0.10755	0.10828	0.10903	0.10965	0.11023	0.11217	0.11338
							2241.09	0.00993	0.00848	2756.03958	29473	2756.03958	25483		2756.03958	0.10184	0.10299	0.10436	0.10535	0.10621	0.107	0.10773	0.10847	0.10909	0.10967	0.1116	0.11281
							2242.05	0.00979	0.0084	2755.07526	29332	2755.07526	31596		2755.07526	0.1013	0.10245	0.10381	0.1048	0.10565	0.10644	0.10717	0.10791	0.10853	0.10911	0.11104	0.11224
							2243.02	0.00964	0.00834	2754.11093	26559	2754.11093	34021		2754.11093	0.10075	0.1019	0.10325	0.10424	0.10509	0.10588	0.10661	0.10736	0.10797	0.10855	0.11048	0.11168
							2243.98	0.00949	0.00828	2753.14661	23150	2753.14661	32838		2753.14661	0.10021	0.10135	0.1027	0.10369	0.10453	0.10532	0.10605	0.1068	0.10741	0.10799	0.10991	0.11112
							2244.95	0.00934	0.00821	2752.18229	20038	2752.18228	29220		2752.18229	0.09967	0.1008	0.10214	0.10314	0.10398	0.10477	0.1055	0.10625	0.10685	0.10743	0.10935	0.11055
							2245.91	0.0092	0.00812	2751.21796	16847	2751.21796	25865		2751.21796	0.09913	0.10025	0.10159	0.10259	0.10343	0.10422	0.10494	0.10569	0.10629	0.10687	0.10879	0.10998
							2246.88	0.00908	0.00803	2750.25364	14053	2750.25364	23284		2750.25364	0.09858	0.09971	0.10104	0.10204	0.10288	0.10366	0.10438	0.10513	0.10573	0.1063	0.10822	0.10942
							2247.84	0.00898	0.00796	2749.28931	12439	2749.28931	20463		2749.28931	0.09803	0.09917	0.1005	0.1015	0.10234	0.1031	0.10383	0.10458	0.10518	0.10574	0.10766	0.10886
							2248.8	0.00888	0.00789	2748.32499	11403	2748.32499	17683		2748.32499	0.0975	0.09864	0.09996	0.10096	0.1018	0.10255	0.10328	0.10403	0.10463	0.1052	0.10711	0.1083
							2249.77	0.00876	0.00783	2747.36066	10361	2747.36066	15446		2747.36066	0.09697	0.0981	0.09942	0.10042	0.10124	0.10201	0.10273	0.10348	0.10408	0.10465	0.10656	0.10774
[truncated: 1,813 more rows]
